# Supplementary material
Source: publisher figshare collection journal article supplement (https://gsajournals.figshare.com/ndownloader/files/13352108)
Supplement: Supplementary file 1 [file 13352108]

## Sheet: Senterica112
Query	DbSeq	Count	%match	matchLen	NumMismatch	GO	q.start	q.end	dbSeqStart	dbSeqEnd	evalue	bitScore	forward	Site	Count of mapped 3' end
NC_003198.1:288913-289117	SeqGr4358204_1	1	100	23	0	0	84	106	28	6	0.0009	44.9	22	1	0
NC_003198.1:288913-289117	SeqGr3863632_1	1	100	23	0	0	84	106	31	9	0.0009	44.9	22	2	0
NC_003198.1:288913-289117	SeqGr2828859_1	1	100	23	0	0	84	106	28	6	0.0009	44.9	22	3	0
NC_003198.1:288913-289117	SeqGr2518127_1	1	100	23	0	0	84	106	30	8	0.0009	44.9	22	4	0
NC_003198.1:288913-289117	SeqGr1445422_1	1	100	23	0	0	84	106	29	7	0.0009	44.9	22	5	0
NC_003198.1:288913-289117	SeqGr943738_1	1	100	23	0	0	84	106	28	6	0.0009	44.9	22	6	0
NC_003198.1:288913-289117	SeqGr447418_3	3	100	23	0	0	84	106	28	6	0.0009	44.9	22	7	0
NC_003198.1:288913-289117	SeqGr3246495_1	1	100	24	0	0	83	106	29	6	0.0002	46.8	23	8	0
NC_003198.1:288913-289117	SeqGr2292442_1	1	100	24	0	0	83	106	28	5	0.0002	46.8	23	9	0
NC_003198.1:288913-289117	SeqGr2125500_1	1	100	24	0	0	83	106	30	7	0.0002	46.8	23	10	0
NC_003198.1:288913-289117	SeqGr2834100_1	1	100	25	0	0	82	106	30	6	6e-05	48.8	24	11	0
NC_003198.1:288913-289117	SeqGr2542266_1	1	100	25	0	0	82	106	30	6	6e-05	48.8	24	12	0
NC_003198.1:288913-289117	SeqGr5190164_1	1	100	26	0	0	81	106	31	6	2e-05	50.7	25	13	0
NC_003198.1:288913-289117	SeqGr4241092_1	1	100	26	0	0	81	106	32	7	2e-05	50.7	25	14	0
NC_003198.1:288913-289117	SeqGr4231259_1	1	100	26	0	0	23	48	26	1	2e-05	50.7	25	15	0
NC_003198.1:288913-289117	SeqGr4078886_1	1	100	30	0	0	77	106	35	6	8e-08	58.4	29	16	0
NC_003198.1:288913-289117	SeqGr500987_1	1	100	30	0	0	77	106	35	6	8e-08	58.4	29	17	0
NC_003198.1:288913-289117	SeqGr2177156_1	1	100	32	0	0	75	106	37	6	5e-09	62.2	31	18	0
NC_003198.1:288913-289117	SeqGr4630226_1	1	100	33	0	0	74	106	38	6	1e-09	64.1	32	19	0
NC_003198.1:288913-289117	SeqGr1123938_1	1	91.43	35	3	0	58	92	48	14	2e-05	50.7	34	20	0
NC_003198.1:288913-289117	SeqGr4847048_1	1	100	36	0	0	71	106	42	7	3e-11	69.9	35	21	0
NC_003198.1:288913-289117	SeqGr2343632_1	1	100	36	0	0	71	106	41	6	3e-11	69.9	35	22	0
NC_003198.1:288913-289117	SeqGr5224570_1	1	97.3	37	1	0	12	48	37	1	4e-10	66.1	36	23	0
NC_003198.1:288913-289117	SeqGr1905680_1	1	97.3	37	1	0	70	106	42	6	4e-10	66.1	36	24	0
NC_003198.1:288913-289117	SeqGr3162794_1	1	100	40	0	0	67	106	45	6	1e-13	77.6	39	25	0
NC_003198.1:288913-289117	SeqGr465028_1	1	97.5	40	1	0	67	106	45	6	7e-12	71.8	39	26	0
NC_003198.1:288913-289117	SeqGr456485_1	1	95	40	2	0	67	106	45	6	4e-10	66.1	39	27	0
NC_003198.1:288913-289117	SeqGr3673118_1	1	100	41	0	0	66	106	46	6	3e-14	79.5	40	28	0
NC_003198.1:288913-289117	SeqGr2673528_1	1	88.1	42	5	0	58	99	48	7	4e-06	52.6	41	29	0
NC_003198.1:288913-289117	SeqGr1165422_1	1	88.1	42	5	0	58	99	48	7	4e-06	52.6	41	30	0
NC_003198.1:288913-289117	SeqGr753734_1	1	88.1	42	5	0	58	99	49	8	4e-06	52.6	41	31	0
NC_003198.1:288913-289117	SeqGr640254_1	1	88.1	42	5	0	58	99	48	7	4e-06	52.6	41	32	0
NC_003198.1:288913-289117	SeqGr357546_1	1	88.1	42	5	0	58	99	49	8	4e-06	52.6	41	33	0
NC_003198.1:288913-289117	SeqGr2865656_1	1	85.71	42	6	0	66	107	48	7	0.0002	46.8	41	34	0
NC_003198.1:288913-289117	SeqGr2160601_1	1	85.71	42	6	0	58	99	48	7	0.0002	46.8	41	35	0
NC_003198.1:288913-289117	SeqGr481891_1	1	85.71	42	6	0	66	107	48	7	0.0002	46.8	41	36	0
NC_003198.1:288913-289117	SeqGr4080297_1	1	86.05	43	6	0	65	107	49	7	6e-05	48.8	42	37	0
NC_003198.1:288913-289117	SeqGr3866793_1	1	86.05	43	6	0	65	107	49	7	6e-05	48.8	42	38	0
NC_003198.1:288913-289117	SeqGr2754076_1	1	86.05	43	6	0	65	107	48	6	6e-05	48.8	42	39	0
NC_003198.1:288913-289117	SeqGr2687337_1	1	86.05	43	6	0	65	107	49	7	6e-05	48.8	42	40	0
NC_003198.1:288913-289117	SeqGr4733702_1	1	100	44	0	0	63	106	50	7	6e-16	85.3	43	41	0
NC_003198.1:288913-289117	SeqGr1101252_1	1	86.36	44	6	0	64	107	50	7	2e-05	50.7	43	42	0
NC_003198.1:288913-289117	SeqGr3533165_1	1	100	45	0	0	62	106	50	6	2e-16	87.2	44	43	0
NC_003198.1:288913-289117	SeqGr2018742_1	1	100	45	0	0	62	106	50	6	2e-16	87.2	44	44	0
NC_003198.1:288913-289117	SeqGr266553_1	1	97.78	45	1	0	62	106	50	6	9e-15	81.4	44	45	0
NC_003198.1:288913-289117	SeqGr1275507_1	1	100	46	0	0	27	72	46	1	4e-17	89.1	45	46	0
NC_003198.1:288913-289117	SeqGr4890789_1	1	97.92	48	1	0	1	48	48	1	2e-16	87.2	47	47	0
NC_003198.1:288913-289117	SeqGr4853214_1	1	97.96	49	1	0	62	110	50	2	4e-17	89.1	48	48	3
NC_003198.1:288913-289117	SeqGr2655762_1	1	98	50	1	0	3	52	50	1	1e-17	91.1	49	49	0
														50	0
														51	0
														52	1
														53	0
														54	0
														55	0
														56	0
														57	0
														58	0
														59	0
														60	0
														61	0
														62	0
														63	0
														64	0
														65	0
														66	0
														67	0
														68	0
														69	0
														70	0
														71	0
														72	1
														73	0
														74	0
														75	0
														76	0
														77	0
														78	0
														79	0
														80	0
														81	0
														82	0
														83	0
														84	0
														85	0
														86	0
														87	0
														88	0
														89	0
														90	0
														91	0
														92	1
														93	0
														94	0
														95	0
														96	0
														97	0
														98	0
														99	6
														100	0
														101	0
														102	0
														103	0
														104	0
														105	0
														106	31
														107	7
														108	0
														109	0
														110	1
														111	0
														112	0
														113	0
														114	0
														115	0
														116	0
														117	0
														118	0
														119	0
														120	0
														121	0
														122	0
														123	0
														124	0
														125	0
														126	0
														127	0
														128	0
														129	0
														130	0
														131	0
														132	0
														133	0
														134	0
														135	0
														136	0
														137	0
														138	0
														139	0
														140	0
														141	0
														142	0
														143	0
														144	0
														145	0
														146	0
														147	0
														148	0
														149	0
														150	0
														151	0
														152	0
														153	0
														154	0
														155	0
														156	0
														157	0
														158	0
														159	0
														160	0
														161	0
														162	0
														163	0
														164	0
														165	0
														166	0
														167	0
														168	0
														169	0
														170	0
														171	0
														172	0
														173	0
														174	0
														175	0
														176	0
														177	0
														178	0
														179	0
														180	0
														181	0
														182	0
														183	0
														184	0
														185	0
														186	0
														187	0
														188	0
														189	0
														190	0
														191	0
														192	0
														193	0
														194	0
														195	0
														196	0
														197	0
														198	0
														199	0
														200	0
														201	0
														202	0
														203	0
														204	0
														205	0

## Sheet: Senterica113
Query	DbSeq	Count	%match	matchLen	NumMismatch	GO	q.start	q.end	dbSeqStart	dbSeqEnd	evalue	bitScore	forward	Site	Count of mapped 3' end
NC_003198.1:288913-289117	SeqGr5001793_1	1	94	50	3	0	27	76	50	1	4e-14	79.5	-49	1	0
NC_003198.1:288913-289117	SeqGr3087296_1	1	100	48	0	0	60	107	50	3	3e-18	93	-47	2	0
NC_003198.1:288913-289117	SeqGr4456087_1	1	100	47	0	0	60	106	50	4	1e-17	91.1	-46	3	0
NC_003198.1:288913-289117	SeqGr4352383_1	1	100	47	0	0	60	106	50	4	1e-17	91.1	-46	4	0
NC_003198.1:288913-289117	SeqGr6057353_1	1	100	46	0	0	23	68	46	1	5e-17	89.1	-45	5	0
NC_003198.1:288913-289117	SeqGr516891_1	1	100	46	0	0	61	106	50	5	5e-17	89.1	-45	6	0
NC_003198.1:288913-289117	SeqGr737272_1	1	100	45	0	0	62	106	50	6	2e-16	87.2	-44	7	0
NC_003198.1:288913-289117	SeqGr251699_1	1	100	45	0	0	62	106	50	6	2e-16	87.2	-44	8	0
NC_003198.1:288913-289117	SeqGr4780334_1	1	97.78	45	1	0	62	106	50	6	1e-14	81.4	-44	9	0
NC_003198.1:288913-289117	SeqGr3617623_1	1	97.78	45	1	0	62	106	50	6	1e-14	81.4	-44	10	0
NC_003198.1:288913-289117	SeqGr2966081_1	1	97.78	45	1	0	62	106	50	6	1e-14	81.4	-44	11	0
NC_003198.1:288913-289117	SeqGr2297727_1	1	97.78	45	1	0	62	106	50	6	1e-14	81.4	-44	12	0
NC_003198.1:288913-289117	SeqGr1967208_1	1	97.78	45	1	0	62	106	50	6	1e-14	81.4	-44	13	0
NC_003198.1:288913-289117	SeqGr960384_1	1	97.78	45	1	0	62	106	50	6	1e-14	81.4	-44	14	0
NC_003198.1:288913-289117	SeqGr1892148_1	1	100	44	0	0	63	106	50	7	7e-16	85.3	-43	15	0
NC_003198.1:288913-289117	SeqGr5105171_1	1	97.73	44	1	0	1	44	44	1	4e-14	79.5	-43	16	0
NC_003198.1:288913-289117	SeqGr4018429_1	1	97.73	44	1	0	63	106	50	7	4e-14	79.5	-43	17	0
NC_003198.1:288913-289117	SeqGr2610265_1	1	97.73	44	1	0	14	57	44	1	4e-14	79.5	-43	18	0
NC_003198.1:288913-289117	SeqGr725662_1	1	86.36	44	6	0	64	107	50	7	2e-05	50.7	-43	19	0
NC_003198.1:288913-289117	SeqGr2202319_1	1	100	43	0	0	64	106	50	8	3e-15	83.4	-42	20	0
NC_003198.1:288913-289117	SeqGr1959449_1	1	95.35	43	2	0	64	106	48	6	8e-12	71.8	-42	21	0
NC_003198.1:288913-289117	SeqGr5032154_1	1	88.37	43	5	0	65	107	49	7	1e-06	54.5	-42	22	0
NC_003198.1:288913-289117	SeqGr5513075_1	1	86.05	43	6	0	65	107	49	7	7e-05	48.8	-42	23	0
NC_003198.1:288913-289117	SeqGr1891868_1	1	86.05	43	6	0	65	107	49	7	7e-05	48.8	-42	24	0
NC_003198.1:288913-289117	SeqGr41153_1	1	86.05	43	6	0	65	107	49	7	7e-05	48.8	-42	25	0
NC_003198.1:288913-289117	SeqGr5176744_1	1	100	42	0	0	65	106	47	6	1e-14	81.4	-41	26	0
NC_003198.1:288913-289117	SeqGr2054517_1	1	100	42	0	0	65	106	47	6	1e-14	81.4	-41	27	0
NC_003198.1:288913-289117	SeqGr1453613_1	1	100	42	0	0	65	106	47	6	1e-14	81.4	-41	28	0
NC_003198.1:288913-289117	SeqGr812120_1	1	100	42	0	0	61	102	50	9	1e-14	81.4	-41	29	1
NC_003198.1:288913-289117	SeqGr348668_1	1	100	42	0	0	65	106	48	7	1e-14	81.4	-41	30	1
NC_003198.1:288913-289117	SeqGr2817131_1	1	97.62	42	1	0	65	106	50	9	5e-13	75.7	-41	31	1
NC_003198.1:288913-289117	SeqGr2426959_1	1	95.24	42	2	0	65	106	47	6	3e-11	69.9	-41	32	0
NC_003198.1:288913-289117	SeqGr3449579_1	1	88.1	42	5	0	58	99	49	8	5e-06	52.6	-41	33	0
NC_003198.1:288913-289117	SeqGr2791433_1	1	88.1	42	5	0	58	99	49	8	5e-06	52.6	-41	34	0
NC_003198.1:288913-289117	SeqGr2374511_1	1	88.1	42	5	0	58	99	48	7	5e-06	52.6	-41	35	0
NC_003198.1:288913-289117	SeqGr1356246_1	1	88.1	42	5	0	58	99	49	8	5e-06	52.6	-41	36	0
NC_003198.1:288913-289117	SeqGr5683542_1	1	85.71	42	6	0	66	107	50	9	0.0003	46.8	-41	37	0
NC_003198.1:288913-289117	SeqGr4938807_1	1	85.71	42	6	0	66	107	48	7	0.0003	46.8	-41	38	0
NC_003198.1:288913-289117	SeqGr2565610_1	1	85.71	42	6	0	58	99	48	7	0.0003	46.8	-41	39	1
NC_003198.1:288913-289117	SeqGr2034356_1	1	85.71	42	6	0	66	107	48	7	0.0003	46.8	-41	40	0
NC_003198.1:288913-289117	SeqGr2005162_1	1	100	41	0	0	66	106	50	10	4e-14	79.5	-40	41	0
NC_003198.1:288913-289117	SeqGr3421551_1	1	87.8	41	5	0	59	99	47	7	2e-05	50.7	-40	42	0
NC_003198.1:288913-289117	SeqGr1885857_1	1	85.37	41	6	0	67	107	47	7	0.001	44.9	-40	43	0
NC_003198.1:288913-289117	SeqGr1145681_1	1	97.5	40	1	0	67	106	45	6	8e-12	71.8	-39	44	2
NC_003198.1:288913-289117	SeqGr1668487_1	1	87.5	40	5	0	60	99	50	11	7e-05	48.8	-39	45	0
NC_003198.1:288913-289117	SeqGr431193_1	1	100	39	0	0	68	106	45	7	5e-13	75.7	-38	46	0
NC_003198.1:288913-289117	SeqGr5996078_1	1	97.44	39	1	0	1	39	39	1	3e-11	69.9	-38	47	0
NC_003198.1:288913-289117	SeqGr1508383_1	1	100	37	0	0	70	106	42	6	8e-12	71.8	-36	48	0
NC_003198.1:288913-289117	SeqGr5414532_1	1	100	36	0	0	71	106	41	6	3e-11	69.9	-35	49	0
NC_003198.1:288913-289117	SeqGr2589359_1	1	100	36	0	0	71	106	42	7	3e-11	69.9	-35	50	0
NC_003198.1:288913-289117	SeqGr3675672_1	1	97.22	36	1	0	71	106	42	7	2e-09	64.1	-35	51	0
NC_003198.1:288913-289117	SeqGr4156300_1	1	100	34	0	0	73	106	39	6	4e-10	66.1	-33	52	0
NC_003198.1:288913-289117	SeqGr2126486_1	1	100	34	0	0	73	106	40	7	4e-10	66.1	-33	53	0
NC_003198.1:288913-289117	SeqGr6012572_1	1	100	33	0	0	74	106	38	6	2e-09	64.1	-32	54	0
NC_003198.1:288913-289117	SeqGr5033579_1	1	100	32	0	0	75	106	38	7	6e-09	62.2	-31	55	0
NC_003198.1:288913-289117	SeqGr2509056_1	1	100	32	0	0	75	106	50	19	6e-09	62.2	-31	56	0
NC_003198.1:288913-289117	SeqGr3772227_1	1	96.88	32	1	0	13	44	32	1	3e-07	56.4	-31	57	1
NC_003198.1:288913-289117	SeqGr5367889_1	1	100	31	0	0	76	106	38	8	2e-08	60.3	-30	58	0
NC_003198.1:288913-289117	SeqGr5317488_1	1	96.77	31	1	0	1	31	31	1	1e-06	54.5	-30	59	0
NC_003198.1:288913-289117	SeqGr3524344_1	1	96.67	30	1	0	1	30	30	1	5e-06	52.6	-29	60	0
NC_003198.1:288913-289117	SeqGr4505862_1	1	96.55	29	1	0	1	29	29	1	2e-05	50.7	-28	61	0
NC_003198.1:288913-289117	SeqGr1685854_1	1	96.55	29	1	0	78	106	35	7	2e-05	50.7	-28	62	0
NC_003198.1:288913-289117	SeqGr3823938_1	1	100	28	0	0	79	106	33	6	1e-06	54.5	-27	63	0
NC_003198.1:288913-289117	SeqGr2915456_1	1	100	25	0	0	82	106	50	26	7e-05	48.8	-24	64	0
NC_003198.1:288913-289117	SeqGr2491009_1	1	100	25	0	0	82	106	46	22	7e-05	48.8	-24	65	0
NC_003198.1:288913-289117	SeqGr5737588_1	1	100	24	0	0	83	106	29	6	0.0003	46.8	-23	66	0
NC_003198.1:288913-289117	SeqGr3378337_1	1	100	24	0	0	83	106	30	7	0.0003	46.8	-23	67	0
NC_003198.1:288913-289117	SeqGr2692030_1	1	100	24	0	0	83	106	29	6	0.0003	46.8	-23	68	1
NC_003198.1:288913-289117	SeqGr1484728_1	1	100	24	0	0	83	106	31	8	0.0003	46.8	-23	69	0
NC_003198.1:288913-289117	SeqGr1184590_1	1	100	24	0	0	83	106	33	10	0.0003	46.8	-23	70	0
NC_003198.1:288913-289117	SeqGr5227319_1	1	100	23	0	0	84	106	30	8	0.001	44.9	-22	71	0
NC_003198.1:288913-289117	SeqGr3756079_1	1	100	23	0	0	84	106	27	5	0.001	44.9	-22	72	0
NC_003198.1:288913-289117	SeqGr3081444_1	1	100	23	0	0	84	106	28	6	0.001	44.9	-22	73	0
NC_003198.1:288913-289117	SeqGr1851554_1	1	100	23	0	0	84	106	29	7	0.001	44.9	-22	74	0
NC_003198.1:288913-289117	SeqGr1436471_1	1	100	23	0	0	84	106	28	6	0.001	44.9	-22	75	0
NC_003198.1:288913-289117	SeqGr1063147_1	1	100	23	0	0	84	106	27	5	0.001	44.9	-22	76	1
NC_003198.1:288913-289117	SeqGr922778_1	1	100	23	0	0	84	106	29	7	0.001	44.9	-22	77	0
NC_003198.1:288913-289117	SeqGr428929_1	1	100	23	0	0	84	106	28	6	0.001	44.9	-22	78	0
NC_003198.1:288913-289117	SeqGr300553_2	2	100	23	0	0	84	106	28	6	0.001	44.9	-22	79	0
														80	0
														81	0
														82	0
														83	0
														84	0
														85	0
														86	0
														87	0
														88	0
														89	0
														90	0
														91	0
														92	0
														93	0
														94	0
														95	0
														96	0
														97	0
														98	0
														99	7
														100	0
														101	0
														102	1
														103	0
														104	0
														105	0
														106	53
														107	10
														108	0
														109	0
														110	0
														111	0
														112	0
														113	0
														114	0
														115	0
														116	0
														117	0
														118	0
														119	0
														120	0
														121	0
														122	0
														123	0
														124	0
														125	0
														126	0
														127	0
														128	0
														129	0
														130	0
														131	0
														132	0
														133	0
														134	0
														135	0
														136	0
														137	0
														138	0
														139	0
														140	0
														141	0
														142	0
														143	0
														144	0
														145	0
														146	0
														147	0
														148	0
														149	0
														150	0
														151	0
														152	0
														153	0
														154	0
														155	0
														156	0
														157	0
														158	0
														159	0
														160	0
														161	0
														162	0
														163	0
														164	0
														165	0
														166	0
														167	0
														168	0
														169	0
														170	0
														171	0
														172	0
														173	0
														174	0
														175	0
														176	0
														177	0
														178	0
														179	0
														180	0
														181	0
														182	0
														183	0
														184	0
														185	0
														186	0
														187	0
														188	0
														189	0
														190	0
														191	0
														192	0
														193	0
														194	0
														195	0
														196	0
														197	0
														198	0
														199	0
														200	0
														201	0
														202	0
														203	0
														204	0
														205	0

## Sheet: Senterica_ALL
Site	Sent112	Sent113	sum count
1	0	0	0
2	0	0	0
3	0	0	0
4	0	0	0
5	0	0	0
6	0	0	0
7	0	0	0
8	0	0	0
9	0	0	0
10	0	0	0
11	0	0	0
12	0	0	0
13	0	0	0
14	0	0	0
15	0	0	0
16	0	0	0
17	0	0	0
18	0	0	0
19	0	0	0
20	0	0	0
21	0	0	0
22	0	0	0
23	0	0	0
24	0	0	0
25	0	0	0
26	0	0	0
27	0	0	0
28	0	0	0
29	0	1	1
30	0	1	1
31	0	1	1
32	0	0	0
33	0	0	0
34	0	0	0
35	0	0	0
36	0	0	0
37	0	0	0
38	0	0	0
39	0	1	1
40	0	0	0
41	0	0	0
42	0	0	0
43	0	0	0
44	0	2	2
45	0	0	0
46	0	0	0
47	0	0	0
48	3	0	3
49	0	0	0
50	0	0	0
51	0	0	0
52	1	0	1
53	0	0	0
54	0	0	0
55	0	0	0
56	0	0	0
57	0	1	1
58	0	0	0
59	0	0	0
60	0	0	0
61	0	0	0
62	0	0	0
63	0	0	0
64	0	0	0
65	0	0	0
66	0	0	0
67	0	0	0
68	0	1	1
69	0	0	0
70	0	0	0
71	0	0	0
72	1	0	1
73	0	0	0
74	0	0	0
75	0	0	0
76	0	1	1
77	0	0	0
78	0	0	0
79	0	0	0
80	0	0	0
81	0	0	0
82	0	0	0
83	0	0	0
84	0	0	0
85	0	0	0
86	0	0	0
87	0	0	0
88	0	0	0
89	0	0	0
90	0	0	0
91	0	0	0
92	1	0	1
93	0	0	0
94	0	0	0
95	0	0	0
96	0	0	0
97	0	0	0
98	0	0	0
99	6	7	13
100	0	0	0
101	0	0	0
102	0	1	1
103	0	0	0
104	0	0	0
105	0	0	0
106	31	53	84
107	7	10	17
108	0	0	0
109	0	0	0
110	1	0	1
111	0	0	0
112	0	0	0
113	0	0	0
114	0	0	0
115	0	0	0
116	0	0	0
117	0	0	0
118	0	0	0
119	0	0	0
120	0	0	0
121	0	0	0
122	0	0	0
123	0	0	0
124	0	0	0
125	0	0	0
126	0	0	0
127	0	0	0
128	0	0	0
129	0	0	0
130	0	0	0
131	0	0	0
132	0	0	0
133	0	0	0
134	0	0	0
135	0	0	0
136	0	0	0
137	0	0	0
138	0	0	0
139	0	0	0
140	0	0	0
141	0	0	0
142	0	0	0
143	0	0	0
144	0	0	0
145	0	0	0
146	0	0	0
147	0	0	0
148	0	0	0
149	0	0	0
150	0	0	0
151	0	0	0
152	0	0	0
153	0	0	0
154	0	0	0
155	0	0	0
156	0	0	0
157	0	0	0
158	0	0	0
159	0	0	0
160	0	0	0
161	0	0	0
162	0	0	0
163	0	0	0
164	0	0	0
165	0	0	0
166	0	0	0
167	0	0	0
168	0	0	0
169	0	0	0
170	0	0	0
171	0	0	0
172	0	0	0
173	0	0	0
174	0	0	0
175	0	0	0
176	0	0	0
177	0	0	0
178	0	0	0
179	0	0	0
180	0	0	0
181	0	0	0
182	0	0	0
183	0	0	0
184	0	0	0
185	0	0	0
186	0	0	0
187	0	0	0
188	0	0	0
189	0	0	0
190	0	0	0
191	0	0	0
192	0	0	0
193	0	0	0
194	0	0	0
195	0	0	0
196	0	0	0
197	0	0	0
198	0	0	0
199	0	0	0
200	0	0	0
201	0	0	0
202	0	0	0
203	0	0	0
204	0	0	0
205	0	0	0

## Sheet: Ssp287
Query	DbSeq	count	%match	matchLen	NumMismatch	GO	q.start	q.end	dbSeqStart	dbSeqEnd	evalue	bitScore	forward	Site	Count of mapped 3' end			NC_000911.1:3326434-3326638	SeqGr457965_1	1	100	22	0	0	184	205	1	22	0.0003	43	21	Site	Count of mapped 3' end
NC_000911.1:3326434-3326638	SeqGr344943_1	1	96	50	2	0	51	100	50	1	6e-17	85.3	-49	1	0			NC_000911.1:3326434-3326638	SeqGr246794_1	1	100	22	0	0	118	139	29	50	0.0003	43	21	1	0
NC_000911.1:3326434-3326638	SeqGr37869_1	1	91.84	49	4	0	46	94	49	1	7e-13	71.8	-48	2	0			NC_000911.1:3326434-3326638	SeqGr211999_1	1	100	22	0	0	184	205	1	22	0.0003	43	21	2	0
NC_000911.1:3326434-3326638	SeqGr128466_1	1	93.75	48	3	0	61	108	48	1	5e-14	75.7	-47	3	0			NC_000911.1:3326434-3326638	SeqGr155432_1	1	100	22	0	0	104	125	29	50	0.0003	43	21	3	0
NC_000911.1:3326434-3326638	SeqGr42976_1	1	95.74	47	2	0	62	108	50	4	3e-15	79.5	-46	4	0			NC_000911.1:3326434-3326638	SeqGr52592_1	1	100	22	0	0	177	198	29	50	0.0003	43	21	4	0
NC_000911.1:3326434-3326638	SeqGr21409_1	1	85.11	47	7	0	60	106	50	4	2e-06	50.7	-46	5	0			NC_000911.1:3326434-3326638	SeqGr469533_1	1	100	23	0	0	119	141	28	50	9e-05	44.9	22	5	0
NC_000911.1:3326434-3326638	SeqGr161870_1	1	95.35	43	2	0	66	108	49	7	7e-13	71.8	-42	6	0			NC_000911.1:3326434-3326638	SeqGr408202_1	1	100	23	0	0	130	152	28	50	9e-05	44.9	22	6	0
NC_000911.1:3326434-3326638	SeqGr114483_1	1	93.02	43	3	0	47	89	45	3	4e-11	66.1	-42	7	0			NC_000911.1:3326434-3326638	SeqGr336247_1	1	100	23	0	0	123	145	28	50	9e-05	44.9	22	7	0
NC_000911.1:3326434-3326638	SeqGr335355_1	1	91.67	36	3	0	65	100	36	1	4e-07	52.6	-35	8	0			NC_000911.1:3326434-3326638	SeqGr286052_1	1	100	23	0	0	146	168	1	23	9e-05	44.9	22	8	0
NC_000911.1:3326434-3326638	SeqGr380432_1	1	96.97	33	1	0	47	79	45	13	8e-09	58.4	-32	9	0			NC_000911.1:3326434-3326638	SeqGr276481_1	1	100	23	0	0	33	55	1	23	9e-05	44.9	22	9	0
NC_000911.1:3326434-3326638	SeqGr326666_1	1	96.97	33	1	0	47	79	43	11	8e-09	58.4	-32	10	0			NC_000911.1:3326434-3326638	SeqGr271067_1	1	100	23	0	0	146	168	1	23	9e-05	44.9	22	10	0
NC_000911.1:3326434-3326638	SeqGr261439_1	1	96.97	33	1	0	47	79	44	12	8e-09	58.4	-32	11	0			NC_000911.1:3326434-3326638	SeqGr195752_1	1	100	23	0	0	1	23	28	50	9e-05	44.9	22	11	0
NC_000911.1:3326434-3326638	SeqGr171394_1	1	93.94	33	2	0	47	79	35	3	4e-07	52.6	-32	12	0			NC_000911.1:3326434-3326638	SeqGr168662_1	1	100	23	0	0	183	205	28	50	9e-05	44.9	22	12	0
NC_000911.1:3326434-3326638	SeqGr148983_1	1	93.94	33	2	0	47	79	36	4	4e-07	52.6	-32	13	0			NC_000911.1:3326434-3326638	SeqGr38467_1	1	100	23	0	0	183	205	1	23	9e-05	44.9	22	13	0
NC_000911.1:3326434-3326638	SeqGr227763_1	1	100	28	0	0	52	79	30	3	1e-07	54.5	-27	14	0			NC_000911.1:3326434-3326638	SeqGr473097_1	1	100	24	0	0	122	145	27	50	2e-05	46.8	23	14	0
NC_000911.1:3326434-3326638	SeqGr84582_1	1	96.15	26	1	0	83	108	34	9	9e-05	44.9	-25	15	0			NC_000911.1:3326434-3326638	SeqGr389739_1	1	100	24	0	0	182	205	1	24	2e-05	46.8	23	15	0
NC_000911.1:3326434-3326638	SeqGr396922_1	1	96	25	1	0	84	108	25	1	0.0003	43	-24	16	0			NC_000911.1:3326434-3326638	SeqGr258157_1	1	100	24	0	0	182	205	13	36	2e-05	46.8	23	16	0
														17	0			NC_000911.1:3326434-3326638	SeqGr239178_1	1	100	24	0	0	148	171	1	24	2e-05	46.8	23	17	0
														18	0			NC_000911.1:3326434-3326638	SeqGr172236_1	1	100	24	0	0	179	202	1	24	2e-05	46.8	23	18	0
														19	0			NC_000911.1:3326434-3326638	SeqGr56250_1	1	100	24	0	0	177	200	27	50	2e-05	46.8	23	19	0
														20	0			NC_000911.1:3326434-3326638	SeqGr51965_1	1	100	24	0	0	114	137	27	50	2e-05	46.8	23	20	0
														21	0			NC_000911.1:3326434-3326638	SeqGr15776_1	1	100	24	0	0	182	205	1	24	2e-05	46.8	23	21	0
														22	0			NC_000911.1:3326434-3326638	SeqGr1568_1	1	100	24	0	0	182	205	1	24	2e-05	46.8	23	22	0
														23	0			NC_000911.1:3326434-3326638	SeqGr232885_1	1	100	25	0	0	119	143	2	26	6e-06	48.8	24	23	1
														24	0			NC_000911.1:3326434-3326638	SeqGr410484_1	1	100	25	0	0	119	143	26	50	6e-06	48.8	24	24	0
														25	0			NC_000911.1:3326434-3326638	SeqGr409371_1	1	100	25	0	0	157	181	1	25	6e-06	48.8	24	25	0
														26	0			NC_000911.1:3326434-3326638	SeqGr321539_1	1	100	25	0	0	168	192	1	25	6e-06	48.8	24	26	1
														27	0			NC_000911.1:3326434-3326638	SeqGr312325_1	1	100	25	0	0	124	148	26	50	6e-06	48.8	24	27	1
														28	0			NC_000911.1:3326434-3326638	SeqGr299181_1	1	100	25	0	0	181	205	2	26	6e-06	48.8	24	28	1
														29	0			NC_000911.1:3326434-3326638	SeqGr290002_1	1	100	25	0	0	126	150	26	50	6e-06	48.8	24	29	0
														30	0			NC_000911.1:3326434-3326638	SeqGr152558_1	1	100	25	0	0	122	146	26	50	6e-06	48.8	24	30	0
														31	0			NC_000911.1:3326434-3326638	SeqGr43024_1	1	96	25	1	0	122	146	26	50	0.0003	43	24	31	2
														32	0			NC_000911.1:3326434-3326638	SeqGr457314_1	1	100	26	0	0	180	205	1	26	2e-06	50.7	25	32	1
														33	0			NC_000911.1:3326434-3326638	SeqGr456398_1	1	100	26	0	0	180	205	1	26	2e-06	50.7	25	33	0
														34	0			NC_000911.1:3326434-3326638	SeqGr437939_1	1	100	26	0	0	180	205	1	26	2e-06	50.7	25	34	0
														35	0			NC_000911.1:3326434-3326638	SeqGr386068_1	1	100	26	0	0	154	179	1	26	2e-06	50.7	25	35	0
														36	0			NC_000911.1:3326434-3326638	SeqGr329151_1	1	100	26	0	0	180	205	1	26	2e-06	50.7	25	36	0
														37	0			NC_000911.1:3326434-3326638	SeqGr311459_1	1	100	26	0	0	140	165	1	26	2e-06	50.7	25	37	0
														38	0			NC_000911.1:3326434-3326638	SeqGr297303_1	1	100	26	0	0	180	205	1	26	2e-06	50.7	25	38	2
														39	0			NC_000911.1:3326434-3326638	SeqGr295452_1	1	100	26	0	0	99	124	25	50	2e-06	50.7	25	39	0
														40	0			NC_000911.1:3326434-3326638	SeqGr294102_1	1	100	26	0	0	1	26	25	50	2e-06	50.7	25	40	0
														41	0			NC_000911.1:3326434-3326638	SeqGr255907_1	1	100	26	0	0	180	205	1	26	2e-06	50.7	25	41	0
														42	0			NC_000911.1:3326434-3326638	SeqGr232885_1	1	100	26	0	0	141	166	25	50	2e-06	50.7	25	42	0
														43	0			NC_000911.1:3326434-3326638	SeqGr206946_1	1	100	26	0	0	20	45	1	26	2e-06	50.7	25	43	1
														44	0			NC_000911.1:3326434-3326638	SeqGr193621_1	1	100	26	0	0	180	205	1	26	2e-06	50.7	25	44	0
														45	0			NC_000911.1:3326434-3326638	SeqGr190735_1	1	100	26	0	0	180	205	1	26	2e-06	50.7	25	45	1
														46	0			NC_000911.1:3326434-3326638	SeqGr190164_1	1	100	26	0	0	180	205	1	26	2e-06	50.7	25	46	0
														47	0			NC_000911.1:3326434-3326638	SeqGr178291_1	1	100	26	0	0	180	205	1	26	2e-06	50.7	25	47	0
														48	0			NC_000911.1:3326434-3326638	SeqGr172373_1	1	100	26	0	0	180	205	1	26	2e-06	50.7	25	48	1
														49	0			NC_000911.1:3326434-3326638	SeqGr128849_1	1	100	26	0	0	131	156	25	50	2e-06	50.7	25	49	0
														50	0			NC_000911.1:3326434-3326638	SeqGr110628_1	1	100	26	0	0	180	205	1	26	2e-06	50.7	25	50	0
														51	0			NC_000911.1:3326434-3326638	SeqGr54189_1	1	100	26	0	0	157	182	1	26	2e-06	50.7	25	51	0
														52	0			NC_000911.1:3326434-3326638	SeqGr46716_1	1	100	26	0	0	180	205	1	26	2e-06	50.7	25	52	0
														53	0			NC_000911.1:3326434-3326638	SeqGr39153_1	1	100	26	0	0	145	170	1	26	2e-06	50.7	25	53	0
														54	0			NC_000911.1:3326434-3326638	SeqGr13607_1	1	100	26	0	0	180	205	1	26	2e-06	50.7	25	54	0
														55	0			NC_000911.1:3326434-3326638	SeqGr211798_1	1	96.15	26	1	0	180	205	1	26	9e-05	44.9	25	55	3
														56	0			NC_000911.1:3326434-3326638	SeqGr383981_1	1	100	27	0	0	179	205	14	40	4e-07	52.6	26	56	0
														57	0			NC_000911.1:3326434-3326638	SeqGr326375_1	1	100	27	0	0	177	203	24	50	4e-07	52.6	26	57	0
														58	0			NC_000911.1:3326434-3326638	SeqGr312786_1	1	100	27	0	0	169	195	24	50	4e-07	52.6	26	58	0
														59	0			NC_000911.1:3326434-3326638	SeqGr249495_1	1	100	27	0	0	1	27	24	50	4e-07	52.6	26	59	0
														60	0			NC_000911.1:3326434-3326638	SeqGr192062_1	1	100	27	0	0	119	145	24	50	4e-07	52.6	26	60	0
														61	0			NC_000911.1:3326434-3326638	SeqGr183089_1	1	100	27	0	0	179	205	1	27	4e-07	52.6	26	61	0
														62	0			NC_000911.1:3326434-3326638	SeqGr131229_1	1	100	27	0	0	153	179	1	27	4e-07	52.6	26	62	0
														63	0			NC_000911.1:3326434-3326638	SeqGr97929_1	1	100	27	0	0	131	157	24	50	4e-07	52.6	26	63	0
														64	0			NC_000911.1:3326434-3326638	SeqGr22785_1	1	100	27	0	0	179	205	24	50	4e-07	52.6	26	64	0
														65	0			NC_000911.1:3326434-3326638	SeqGr468133_1	1	100	28	0	0	177	204	23	50	1e-07	54.5	27	65	0
														66	0			NC_000911.1:3326434-3326638	SeqGr417217_1	1	100	28	0	0	119	146	20	47	1e-07	54.5	27	66	0
														67	0			NC_000911.1:3326434-3326638	SeqGr398153_1	1	100	28	0	0	1	28	23	50	1e-07	54.5	27	67	0
														68	0			NC_000911.1:3326434-3326638	SeqGr51470_1	1	100	28	0	0	178	205	1	28	1e-07	54.5	27	68	0
														69	0			NC_000911.1:3326434-3326638	SeqGr466587_1	1	100	29	0	0	20	48	1	29	3e-08	56.4	28	69	0
														70	0			NC_000911.1:3326434-3326638	SeqGr422504_1	1	100	29	0	0	177	205	1	29	3e-08	56.4	28	70	0
														71	0			NC_000911.1:3326434-3326638	SeqGr407829_1	1	100	29	0	0	177	205	1	29	3e-08	56.4	28	71	0
														72	0			NC_000911.1:3326434-3326638	SeqGr334090_1	1	100	29	0	0	177	205	1	29	3e-08	56.4	28	72	0
														73	0			NC_000911.1:3326434-3326638	SeqGr287043_1	1	100	29	0	0	177	205	1	29	3e-08	56.4	28	73	0
														74	0			NC_000911.1:3326434-3326638	SeqGr268437_1	1	100	29	0	0	177	205	1	29	3e-08	56.4	28	74	0
														75	0			NC_000911.1:3326434-3326638	SeqGr232526_1	1	100	29	0	0	177	205	1	29	3e-08	56.4	28	75	0
														76	0			NC_000911.1:3326434-3326638	SeqGr232034_1	1	100	29	0	0	177	205	1	29	3e-08	56.4	28	76	0
														77	0			NC_000911.1:3326434-3326638	SeqGr138141_1	1	100	29	0	0	177	205	1	29	3e-08	56.4	28	77	0
														78	0			NC_000911.1:3326434-3326638	SeqGr90053_1	1	100	29	0	0	177	205	1	29	3e-08	56.4	28	78	0
														79	6			NC_000911.1:3326434-3326638	SeqGr22399_1	1	100	29	0	0	177	205	1	29	3e-08	56.4	28	79	0
														80	0			NC_000911.1:3326434-3326638	SeqGr3682_1	1	100	29	0	0	177	205	1	29	3e-08	56.4	28	80	0
														81	0			NC_000911.1:3326434-3326638	SeqGr467215_1	1	96.55	29	1	0	122	150	22	50	2e-06	50.7	28	81	0
														82	0			NC_000911.1:3326434-3326638	SeqGr209481_1	1	96.55	29	1	0	177	205	1	29	2e-06	50.7	28	82	0
														83	0			NC_000911.1:3326434-3326638	SeqGr431045_1	1	100	30	0	0	119	148	21	50	8e-09	58.4	29	83	0
														84	0			NC_000911.1:3326434-3326638	SeqGr400461_1	1	100	30	0	0	126	155	21	50	8e-09	58.4	29	84	0
														85	0			NC_000911.1:3326434-3326638	SeqGr380969_1	1	100	30	0	0	138	167	1	30	8e-09	58.4	29	85	0
														86	0			NC_000911.1:3326434-3326638	SeqGr284364_1	1	100	30	0	0	126	155	21	50	8e-09	58.4	29	86	0
														87	0			NC_000911.1:3326434-3326638	SeqGr172968_1	1	100	30	0	0	176	205	1	30	8e-09	58.4	29	87	0
														88	0			NC_000911.1:3326434-3326638	SeqGr108119_1	1	100	30	0	0	176	205	9	38	8e-09	58.4	29	88	0
														89	1			NC_000911.1:3326434-3326638	SeqGr72944_1	1	100	30	0	0	176	205	1	30	8e-09	58.4	29	89	0
														90	0			NC_000911.1:3326434-3326638	SeqGr446952_1	1	100	31	0	0	126	156	20	50	2e-09	60.3	30	90	0
														91	0			NC_000911.1:3326434-3326638	SeqGr352743_1	1	100	31	0	0	168	198	20	50	2e-09	60.3	30	91	0
														92	0			NC_000911.1:3326434-3326638	SeqGr273923_1	1	100	31	0	0	1	31	20	50	2e-09	60.3	30	92	0
														93	0			NC_000911.1:3326434-3326638	SeqGr267667_1	1	100	31	0	0	1	31	2	32	2e-09	60.3	30	93	1
														94	1			NC_000911.1:3326434-3326638	SeqGr256710_1	1	100	31	0	0	123	153	6	36	2e-09	60.3	30	94	0
														95	0			NC_000911.1:3326434-3326638	SeqGr245195_1	1	100	31	0	0	25	55	1	31	2e-09	60.3	30	95	0
														96	0			NC_000911.1:3326434-3326638	SeqGr233872_1	1	100	31	0	0	126	156	20	50	2e-09	60.3	30	96	0
														97	0			NC_000911.1:3326434-3326638	SeqGr142332_1	1	96.77	31	1	0	175	205	18	48	1e-07	54.5	30	97	0
														98	0			NC_000911.1:3326434-3326638	SeqGr275536_1	1	100	32	0	0	174	205	1	32	5e-10	62.2	31	98	0
														99	0			NC_000911.1:3326434-3326638	SeqGr260604_1	1	100	32	0	0	126	157	19	50	5e-10	62.2	31	99	0
														100	2			NC_000911.1:3326434-3326638	SeqGr197204_1	1	100	32	0	0	126	157	19	50	5e-10	62.2	31	100	0
														101	0			NC_000911.1:3326434-3326638	SeqGr196289_1	1	100	32	0	0	119	150	19	50	5e-10	62.2	31	101	0
														102	0			NC_000911.1:3326434-3326638	SeqGr164856_1	1	100	32	0	0	124	155	19	50	5e-10	62.2	31	102	0
														103	0			NC_000911.1:3326434-3326638	SeqGr157385_1	1	100	32	0	0	1	32	19	50	5e-10	62.2	31	103	0
														104	0			NC_000911.1:3326434-3326638	SeqGr303550_1	1	100	33	0	0	173	205	1	33	1e-10	64.1	32	104	0
														105	0			NC_000911.1:3326434-3326638	SeqGr89952_1	1	100	33	0	0	133	165	18	50	1e-10	64.1	32	105	0
														106	1			NC_000911.1:3326434-3326638	SeqGr39417_1	1	100	33	0	0	119	151	18	50	1e-10	64.1	32	106	0
														107	0			NC_000911.1:3326434-3326638	SeqGr370664_1	1	100	34	0	0	172	205	1	34	4e-11	66.1	33	107	0
														108	5			NC_000911.1:3326434-3326638	SeqGr265087_1	1	100	34	0	0	126	159	17	50	4e-11	66.1	33	108	0
														109	0			NC_000911.1:3326434-3326638	SeqGr242368_1	1	100	34	0	0	172	205	1	34	4e-11	66.1	33	109	0
														110	0			NC_000911.1:3326434-3326638	SeqGr68079_1	1	100	34	0	0	172	205	6	39	4e-11	66.1	33	110	0
														111	0			NC_000911.1:3326434-3326638	SeqGr56542_1	1	100	34	0	0	172	205	1	34	4e-11	66.1	33	111	0
														112	0			NC_000911.1:3326434-3326638	SeqGr1734_1	1	100	34	0	0	119	152	17	50	4e-11	66.1	33	112	0
														113	0			NC_000911.1:3326434-3326638	SeqGr345971_1	1	100	35	0	0	171	205	1	35	1e-11	68	34	113	0
														114	0			NC_000911.1:3326434-3326638	SeqGr265896_1	1	100	35	0	0	171	205	14	48	1e-11	68	34	114	1
														115	0			NC_000911.1:3326434-3326638	SeqGr199096_1	1	100	35	0	0	171	205	1	35	1e-11	68	34	115	0
														116	0			NC_000911.1:3326434-3326638	SeqGr41271_1	1	100	35	0	0	126	160	16	50	1e-11	68	34	116	0
														117	0			NC_000911.1:3326434-3326638	SeqGr35060_1	1	100	35	0	0	171	205	1	35	1e-11	68	34	117	0
														118	0			NC_000911.1:3326434-3326638	SeqGr199704_1	1	100	36	0	0	112	147	15	50	3e-12	69.9	35	118	1
														119	0			NC_000911.1:3326434-3326638	SeqGr131970_1	1	100	37	0	0	123	159	14	50	7e-13	71.8	36	119	0
														120	0			NC_000911.1:3326434-3326638	SeqGr121855_1	1	100	37	0	0	112	148	14	50	7e-13	71.8	36	120	0
														121	0			NC_000911.1:3326434-3326638	SeqGr50679_1	1	100	37	0	0	2	38	1	37	7e-13	71.8	36	121	0
														122	0			NC_000911.1:3326434-3326638	SeqGr443213_1	1	100	38	0	0	1	38	4	41	2e-13	73.7	37	122	0
														123	0			NC_000911.1:3326434-3326638	SeqGr421056_1	1	100	38	0	0	142	179	1	38	2e-13	73.7	37	123	0
														124	0			NC_000911.1:3326434-3326638	SeqGr302435_1	1	100	38	0	0	168	205	1	38	2e-13	73.7	37	124	1
														125	0			NC_000911.1:3326434-3326638	SeqGr48271_1	1	100	38	0	0	123	160	13	50	2e-13	73.7	37	125	1
														126	0			NC_000911.1:3326434-3326638	SeqGr400396_1	1	100	39	0	0	141	179	1	39	5e-14	75.7	38	126	0
														127	0			NC_000911.1:3326434-3326638	SeqGr288051_1	1	100	39	0	0	167	205	1	39	5e-14	75.7	38	127	0
														128	0			NC_000911.1:3326434-3326638	SeqGr66433_1	1	100	39	0	0	123	161	12	50	5e-14	75.7	38	128	0
														129	0			NC_000911.1:3326434-3326638	SeqGr169001_1	1	100	40	0	0	16	55	1	40	1e-14	77.6	39	129	0
														130	0			NC_000911.1:3326434-3326638	SeqGr104782_1	1	100	40	0	0	166	205	1	40	1e-14	77.6	39	130	0
														131	0			NC_000911.1:3326434-3326638	SeqGr19145_1	1	100	40	0	0	166	205	1	40	1e-14	77.6	39	131	0
														132	0			NC_000911.1:3326434-3326638	SeqGr193000_1	1	100	41	0	0	141	181	1	41	3e-15	79.5	40	132	0
														133	0			NC_000911.1:3326434-3326638	SeqGr30954_1	1	100	41	0	0	165	205	1	41	3e-15	79.5	40	133	0
														134	0			NC_000911.1:3326434-3326638	SeqGr435299_1	1	100	42	0	0	164	205	1	42	9e-16	81.4	41	134	0
														135	0			NC_000911.1:3326434-3326638	SeqGr417919_1	1	100	43	0	0	137	179	1	43	2e-16	83.4	42	135	0
														136	0			NC_000911.1:3326434-3326638	SeqGr361303_1	1	100	43	0	0	1	43	4	46	2e-16	83.4	42	136	0
														137	0			NC_000911.1:3326434-3326638	SeqGr339344_1	1	100	43	0	0	120	162	8	50	2e-16	83.4	42	137	1
														138	0			NC_000911.1:3326434-3326638	SeqGr34745_1	1	100	43	0	0	163	205	1	43	2e-16	83.4	42	138	0
														139	0			NC_000911.1:3326434-3326638	SeqGr424691_1	1	100	45	0	0	136	180	1	45	2e-17	87.2	44	139	1
														140	0			NC_000911.1:3326434-3326638	SeqGr180610_1	1	100	45	0	0	123	167	6	50	2e-17	87.2	44	140	0
														141	0			NC_000911.1:3326434-3326638	SeqGr315149_1	1	100	46	0	0	129	174	1	46	4e-18	89.1	45	141	1
														142	0			NC_000911.1:3326434-3326638	SeqGr298526_1	1	100	46	0	0	160	205	1	46	4e-18	89.1	45	142	0
														143	0			NC_000911.1:3326434-3326638	SeqGr13990_1	1	100	46	0	0	120	165	2	47	4e-18	89.1	45	143	2
														144	0			NC_000911.1:3326434-3326638	SeqGr474981_1	1	100	47	0	0	119	165	1	47	1e-18	91.1	46	144	0
														145	0			NC_000911.1:3326434-3326638	SeqGr69322_1	1	100	47	0	0	100	146	1	47	1e-18	91.1	46	145	3
														146	0			NC_000911.1:3326434-3326638	SeqGr56122_1	1	100	47	0	0	119	165	1	47	1e-18	91.1	46	146	5
														147	0			NC_000911.1:3326434-3326638	SeqGr2565_1	1	100	48	0	0	158	205	1	48	3e-19	93	47	147	1
														148	0			NC_000911.1:3326434-3326638	SeqGr404135_1	1	100	49	0	0	123	171	2	50	8e-20	94.9	48	148	3
														149	0			NC_000911.1:3326434-3326638	SeqGr309516_1	1	100	49	0	0	126	174	1	49	8e-20	94.9	48	149	0
														150	0			NC_000911.1:3326434-3326638	SeqGr136513_1	1	100	49	0	0	119	167	2	50	8e-20	94.9	48	150	3
														151	0			NC_000911.1:3326434-3326638	SeqGr128556_1	1	100	49	0	0	119	167	2	50	8e-20	94.9	48	151	1
														152	0			NC_000911.1:3326434-3326638	SeqGr42017_1	1	100	49	0	0	157	205	1	49	8e-20	94.9	48	152	3
														153	0			NC_000911.1:3326434-3326638	SeqGr456585_1	1	100	50	0	0	69	118	1	50	2e-20	96.8	49	153	1
														154	0			NC_000911.1:3326434-3326638	SeqGr395481_1	1	100	50	0	0	122	171	1	50	2e-20	96.8	49	154	0
														155	0			NC_000911.1:3326434-3326638	SeqGr371867_1	1	100	50	0	0	97	146	1	50	2e-20	96.8	49	155	3
														156	0			NC_000911.1:3326434-3326638	SeqGr333603_1	1	100	50	0	0	44	93	1	50	2e-20	96.8	49	156	3
														157	0			NC_000911.1:3326434-3326638	SeqGr311067_1	1	100	50	0	0	152	201	1	50	2e-20	96.8	49	157	3
														158	0			NC_000911.1:3326434-3326638	SeqGr294827_1	1	100	50	0	0	154	203	1	50	2e-20	96.8	49	158	0
														159	0			NC_000911.1:3326434-3326638	SeqGr263487_1	1	100	50	0	0	65	114	1	50	2e-20	96.8	49	159	2
														160	0			NC_000911.1:3326434-3326638	SeqGr261305_1	1	100	50	0	0	142	191	1	50	2e-20	96.8	49	160	2
														161	0			NC_000911.1:3326434-3326638	SeqGr225924_1	1	100	50	0	0	103	152	1	50	2e-20	96.8	49	161	6
														162	0			NC_000911.1:3326434-3326638	SeqGr218485_1	1	100	50	0	0	126	175	1	50	2e-20	96.8	49	162	1
														163	0			NC_000911.1:3326434-3326638	SeqGr160276_1	1	100	50	0	0	156	205	1	50	2e-20	96.8	49	163	0
														164	0			NC_000911.1:3326434-3326638	SeqGr149348_1	1	100	50	0	0	141	190	1	50	2e-20	96.8	49	164	0
														165	0			NC_000911.1:3326434-3326638	SeqGr130997_1	1	100	50	0	0	124	173	1	50	2e-20	96.8	49	165	5
														166	0			NC_000911.1:3326434-3326638	SeqGr101642_1	1	100	50	0	0	134	183	1	50	2e-20	96.8	49	166	1
														167	0			NC_000911.1:3326434-3326638	SeqGr38459_1	1	100	50	0	0	138	187	1	50	2e-20	96.8	49	167	4
														168	0			NC_000911.1:3326434-3326638	SeqGr27214_1	1	100	50	0	0	155	204	1	50	2e-20	96.8	49	168	2
														169	0			NC_000911.1:3326434-3326638	SeqGr21253_1	1	100	50	0	0	136	185	1	50	2e-20	96.8	49	169	0
														170	0			NC_000911.1:3326434-3326638	SeqGr16717_1	1	100	50	0	0	130	179	1	50	2e-20	96.8	49	170	1
														171	0			NC_000911.1:3326434-3326638	SeqGr15924_1	1	100	50	0	0	137	186	1	50	2e-20	96.8	49	171	3
														172	0			NC_000911.1:3326434-3326638	SeqGr15877_1	1	100	50	0	0	112	161	1	50	2e-20	96.8	49	172	0
														173	0			NC_000911.1:3326434-3326638	SeqGr440216_1	1	98	50	1	0	112	161	1	50	1e-18	91.1	49	173	1
														174	0			NC_000911.1:3326434-3326638	SeqGr351908_1	1	98	50	1	0	112	161	1	50	1e-18	91.1	49	174	2
														175	0			NC_000911.1:3326434-3326638	SeqGr331682_1	1	98	50	1	0	112	161	1	50	1e-18	91.1	49	175	1
														176	0			NC_000911.1:3326434-3326638	SeqGr57389_1	1	98	50	1	0	112	161	1	50	1e-18	91.1	49	176	0
														177	0																	177	0
														178	0																	178	0
														179	0																	179	6
														180	0																	180	1
														181	0																	181	2
														182	0																	182	1
														183	0																	183	1
														184	0																	184	0
														185	0																	185	1
														186	0																	186	1
														187	0																	187	1
														188	0																	188	0
														189	0																	189	0
														190	0																	190	1
														191	0																	191	1
														192	0																	192	1
														193	0																	193	0
														194	0																	194	0
														195	0																	195	1
														196	0																	196	0
														197	0																	197	0
														198	0																	198	2
														199	0																	199	0
														200	0																	200	1
														201	0																	201	1
														202	0																	202	1
														203	0																	203	2
														204	0																	204	2
														205	0																	205	65

## Sheet: Ssp285
Query	DbSeq	Count	%match	matchLen	NumMismatch	GO	q.start	q.end	dbSeqStart	dbSeqEnd	evalue	bitScore	forward	Site	Count of mapped 3' end	Query	DbSeq	Count	%match	matchLen	NumMismatch	GO	q.start	q.end	dbSeqStart	dbSeqEnd	evalue	bitScore	forward	Site	Count of mapped 3' end
NC_000911.1:3326434-3326638	SeqGr300757_1	1	100	25	0	0	119	143	26	50	4e-06	48.8	24	1	0	NC_000911.1:3326434-3326638	SeqGr224087_1	1	96	50	2	0	51	100	50	1	4e-17	85.3	-49	1	0
NC_000911.1:3326434-3326638	SeqGr296232_1	1	100	25	0	0	181	205	2	26	4e-06	48.8	24	2	0	NC_000911.1:3326434-3326638	SeqGr106401_1	1	94	50	3	0	59	108	50	1	2e-15	79.5	-49	2	0
NC_000911.1:3326434-3326638	SeqGr274530_1	1	100	25	0	0	141	165	1	25	4e-06	48.8	24	3	0	NC_000911.1:3326434-3326638	SeqGr66488_1	1	94	50	3	0	59	108	50	1	2e-15	79.5	-49	3	0
NC_000911.1:3326434-3326638	SeqGr259998_1	1	100	25	0	0	181	205	1	25	4e-06	48.8	24	4	0	NC_000911.1:3326434-3326638	SeqGr184226_1	1	92	50	4	0	54	103	50	1	1e-13	73.7	-49	4	0
NC_000911.1:3326434-3326638	SeqGr255827_1	1	100	25	0	0	126	150	26	50	4e-06	48.8	24	5	0	NC_000911.1:3326434-3326638	SeqGr61209_1	1	92	50	4	0	59	108	50	1	1e-13	73.7	-49	5	0
NC_000911.1:3326434-3326638	SeqGr208035_1	1	100	25	0	0	118	142	1	25	4e-06	48.8	24	6	0	NC_000911.1:3326434-3326638	SeqGr189039_1	1	95.92	49	2	0	60	108	50	2	2e-16	83.4	-48	6	0
NC_000911.1:3326434-3326638	SeqGr205462_1	1	100	25	0	0	124	148	26	50	4e-06	48.8	24	7	0	NC_000911.1:3326434-3326638	SeqGr227510_1	1	95.83	48	2	0	51	98	48	1	6e-16	81.4	-47	7	0
NC_000911.1:3326434-3326638	SeqGr201127_1	1	100	25	0	0	181	205	1	25	4e-06	48.8	24	8	0	NC_000911.1:3326434-3326638	SeqGr72075_1	1	85.11	47	7	0	60	106	50	4	1e-06	50.7	-46	8	0
NC_000911.1:3326434-3326638	SeqGr162104_1	1	100	25	0	0	122	146	26	50	4e-06	48.8	24	9	0	NC_000911.1:3326434-3326638	SeqGr274358_1	1	95.65	46	2	0	63	108	50	5	9e-15	77.6	-45	9	0
NC_000911.1:3326434-3326638	SeqGr101060_1	1	100	25	0	0	177	201	26	50	4e-06	48.8	24	10	0	NC_000911.1:3326434-3326638	SeqGr191304_1	1	84.78	46	7	0	61	106	50	5	4e-06	48.8	-45	10	0
NC_000911.1:3326434-3326638	SeqGr10079_1	1	100	25	0	0	141	165	1	25	4e-06	48.8	24	11	0	NC_000911.1:3326434-3326638	SeqGr292147_1	1	95.45	44	2	0	65	108	49	6	1e-13	73.7	-43	11	0
NC_000911.1:3326434-3326638	SeqGr325174_1	1	100	26	0	0	180	205	1	26	1e-06	50.7	25	12	0	NC_000911.1:3326434-3326638	SeqGr215454_1	1	93.02	43	3	0	47	89	45	3	3e-11	66.1	-42	12	0
NC_000911.1:3326434-3326638	SeqGr321209_1	1	100	26	0	0	126	151	25	50	1e-06	50.7	25	13	0	NC_000911.1:3326434-3326638	SeqGr188368_1	1	93.02	43	3	0	47	89	43	1	3e-11	66.1	-42	13	0
NC_000911.1:3326434-3326638	SeqGr306346_1	1	100	26	0	0	154	179	1	26	1e-06	50.7	25	14	0	NC_000911.1:3326434-3326638	SeqGr82246_1	1	93.02	43	3	0	47	89	45	3	3e-11	66.1	-42	14	0
NC_000911.1:3326434-3326638	SeqGr297308_1	1	100	26	0	0	180	205	1	26	1e-06	50.7	25	15	0	NC_000911.1:3326434-3326638	SeqGr35928_1	1	93.02	43	3	0	47	89	43	1	3e-11	66.1	-42	15	0
NC_000911.1:3326434-3326638	SeqGr274154_1	1	100	26	0	0	180	205	1	26	1e-06	50.7	25	16	0	NC_000911.1:3326434-3326638	SeqGr284454_1	1	95.24	42	2	0	67	108	42	1	2e-12	69.9	-41	16	0
NC_000911.1:3326434-3326638	SeqGr272272_1	1	100	26	0	0	180	205	1	26	1e-06	50.7	25	17	0	NC_000911.1:3326434-3326638	SeqGr57098_1	1	94.44	36	2	0	65	100	37	2	5e-09	58.4	-35	17	0
NC_000911.1:3326434-3326638	SeqGr255288_1	1	100	26	0	0	180	205	1	26	1e-06	50.7	25	18	0	NC_000911.1:3326434-3326638	SeqGr322043_1	1	96.97	33	1	0	47	79	43	11	5e-09	58.4	-32	18	0
NC_000911.1:3326434-3326638	SeqGr244773_1	1	100	26	0	0	180	205	1	26	1e-06	50.7	25	19	0	NC_000911.1:3326434-3326638	SeqGr147039_1	1	96.97	33	1	0	47	79	45	13	5e-09	58.4	-32	19	0
NC_000911.1:3326434-3326638	SeqGr240737_1	1	100	26	0	0	126	151	25	50	1e-06	50.7	25	20	0	NC_000911.1:3326434-3326638	SeqGr94528_1	1	96.97	33	1	0	47	79	33	1	5e-09	58.4	-32	20	0
NC_000911.1:3326434-3326638	SeqGr233452_1	1	100	26	0	0	180	205	1	26	1e-06	50.7	25	21	0	NC_000911.1:3326434-3326638	SeqGr70035_1	1	96.97	33	1	0	52	84	42	10	5e-09	58.4	-32	21	0
NC_000911.1:3326434-3326638	SeqGr198553_1	1	100	26	0	0	180	205	1	26	1e-06	50.7	25	22	0	NC_000911.1:3326434-3326638	SeqGr44499_1	1	96.97	33	1	0	47	79	44	12	5e-09	58.4	-32	22	0
NC_000911.1:3326434-3326638	SeqGr197811_1	1	100	26	0	0	180	205	1	26	1e-06	50.7	25	23	0	NC_000911.1:3326434-3326638	SeqGr74380_1	1	93.94	33	2	0	47	79	36	4	3e-07	52.6	-32	23	0
NC_000911.1:3326434-3326638	SeqGr193383_1	1	100	26	0	0	180	205	1	26	1e-06	50.7	25	24	0	NC_000911.1:3326434-3326638	SeqGr117592_1	1	96.88	32	1	0	47	78	32	1	2e-08	56.4	-31	24	0
NC_000911.1:3326434-3326638	SeqGr176340_1	1	100	26	0	0	180	205	1	26	1e-06	50.7	25	25	0	NC_000911.1:3326434-3326638	SeqGr106949_1	1	96.55	29	1	0	51	79	29	1	1e-06	50.7	-28	25	0
NC_000911.1:3326434-3326638	SeqGr168592_1	1	100	26	0	0	180	205	1	26	1e-06	50.7	25	26	0	NC_000911.1:3326434-3326638	SeqGr297243_1	1	100	27	0	0	47	73	49	23	3e-07	52.6	-26	26	0
NC_000911.1:3326434-3326638	SeqGr158284_1	1	100	26	0	0	180	205	1	26	1e-06	50.7	25	27	0	NC_000911.1:3326434-3326638	SeqGr163263_1	1	100	27	0	0	47	73	29	3	3e-07	52.6	-26	27	0
NC_000911.1:3326434-3326638	SeqGr145565_1	1	100	26	0	0	180	205	1	26	1e-06	50.7	25	28	1	NC_000911.1:3326434-3326638	SeqGr154354_1	1	100	27	0	0	47	73	30	4	3e-07	52.6	-26	28	0
NC_000911.1:3326434-3326638	SeqGr138411_1	1	100	26	0	0	180	205	1	26	1e-06	50.7	25	29	0															29	0
NC_000911.1:3326434-3326638	SeqGr114512_1	1	100	26	0	0	118	143	25	50	1e-06	50.7	25	30	2															30	0
NC_000911.1:3326434-3326638	SeqGr105123_1	1	100	26	0	0	180	205	1	26	1e-06	50.7	25	31	1															31	0
NC_000911.1:3326434-3326638	SeqGr99373_1	1	100	26	0	0	180	205	1	26	1e-06	50.7	25	32	1															32	0
NC_000911.1:3326434-3326638	SeqGr79506_1	1	100	26	0	0	180	205	1	26	1e-06	50.7	25	33	1															33	0
NC_000911.1:3326434-3326638	SeqGr79228_1	1	100	26	0	0	180	205	1	26	1e-06	50.7	25	34	0															34	0
NC_000911.1:3326434-3326638	SeqGr79055_1	1	100	26	0	0	180	205	1	26	1e-06	50.7	25	35	0															35	0
NC_000911.1:3326434-3326638	SeqGr73573_1	1	100	26	0	0	165	190	25	50	1e-06	50.7	25	36	1															36	0
NC_000911.1:3326434-3326638	SeqGr70081_1	1	100	26	0	0	180	205	1	26	1e-06	50.7	25	37	1															37	0
NC_000911.1:3326434-3326638	SeqGr63844_1	1	100	26	0	0	180	205	24	49	1e-06	50.7	25	38	3															38	0
NC_000911.1:3326434-3326638	SeqGr58599_1	1	100	26	0	0	180	205	1	26	1e-06	50.7	25	39	0															39	0
NC_000911.1:3326434-3326638	SeqGr56097_1	1	100	26	0	0	180	205	1	26	1e-06	50.7	25	40	0															40	0
NC_000911.1:3326434-3326638	SeqGr54168_1	1	100	26	0	0	119	144	25	50	1e-06	50.7	25	41	0															41	0
NC_000911.1:3326434-3326638	SeqGr48977_1	1	100	26	0	0	180	205	1	26	1e-06	50.7	25	42	0															42	0
NC_000911.1:3326434-3326638	SeqGr46156_1	1	100	26	0	0	180	205	1	26	1e-06	50.7	25	43	2															43	0
NC_000911.1:3326434-3326638	SeqGr38907_1	1	100	26	0	0	180	205	1	26	1e-06	50.7	25	44	2															44	0
NC_000911.1:3326434-3326638	SeqGr21893_1	1	100	26	0	0	125	150	25	50	1e-06	50.7	25	45	2															45	0
NC_000911.1:3326434-3326638	SeqGr17459_1	1	100	26	0	0	180	205	1	26	1e-06	50.7	25	46	1															46	0
NC_000911.1:3326434-3326638	SeqGr3366_1	1	100	26	0	0	126	151	25	50	1e-06	50.7	25	47	0															47	0
NC_000911.1:3326434-3326638	SeqGr705_1	1	100	26	0	0	180	205	1	26	1e-06	50.7	25	48	0															48	0
NC_000911.1:3326434-3326638	SeqGr288775_1	1	100	27	0	0	131	157	24	50	3e-07	52.6	26	49	0															49	0
NC_000911.1:3326434-3326638	SeqGr261339_1	1	100	27	0	0	119	145	24	50	3e-07	52.6	26	50	0															50	0
NC_000911.1:3326434-3326638	SeqGr199432_1	1	100	27	0	0	18	44	1	27	3e-07	52.6	26	51	0															51	0
NC_000911.1:3326434-3326638	SeqGr182043_1	1	100	27	0	0	136	162	1	27	3e-07	52.6	26	52	0															52	0
NC_000911.1:3326434-3326638	SeqGr181575_1	1	100	27	0	0	153	179	1	27	3e-07	52.6	26	53	1															53	0
NC_000911.1:3326434-3326638	SeqGr152877_1	1	100	27	0	0	154	180	1	27	3e-07	52.6	26	54	2															54	0
NC_000911.1:3326434-3326638	SeqGr100626_1	1	100	27	0	0	122	148	1	27	3e-07	52.6	26	55	1															55	0
NC_000911.1:3326434-3326638	SeqGr88385_1	1	100	27	0	0	179	205	1	27	3e-07	52.6	26	56	0															56	0
NC_000911.1:3326434-3326638	SeqGr24401_1	1	100	27	0	0	126	152	24	50	3e-07	52.6	26	57	0															57	0
NC_000911.1:3326434-3326638	SeqGr22238_1	1	100	27	0	0	17	43	1	27	3e-07	52.6	26	58	0															58	0
NC_000911.1:3326434-3326638	SeqGr329908_1	1	100	28	0	0	125	152	23	50	8e-08	54.5	27	59	0															59	0
NC_000911.1:3326434-3326638	SeqGr324935_1	1	100	28	0	0	178	205	22	49	8e-08	54.5	27	60	0															60	0
NC_000911.1:3326434-3326638	SeqGr290916_1	1	100	28	0	0	178	205	1	28	8e-08	54.5	27	61	0															61	0
NC_000911.1:3326434-3326638	SeqGr283384_1	1	100	28	0	0	178	205	1	28	8e-08	54.5	27	62	0															62	0
NC_000911.1:3326434-3326638	SeqGr277988_1	1	100	28	0	0	166	193	1	28	8e-08	54.5	27	63	0															63	0
NC_000911.1:3326434-3326638	SeqGr271896_1	1	100	28	0	0	178	205	1	28	8e-08	54.5	27	64	0															64	0
NC_000911.1:3326434-3326638	SeqGr261335_1	1	100	28	0	0	126	153	23	50	8e-08	54.5	27	65	0															65	0
NC_000911.1:3326434-3326638	SeqGr100533_1	1	100	28	0	0	178	205	1	28	8e-08	54.5	27	66	0															66	0
NC_000911.1:3326434-3326638	SeqGr61541_1	1	100	28	0	0	119	146	23	50	8e-08	54.5	27	67	0															67	0
NC_000911.1:3326434-3326638	SeqGr60306_1	1	100	28	0	0	119	146	20	47	8e-08	54.5	27	68	1															68	0
NC_000911.1:3326434-3326638	SeqGr55668_1	1	100	28	0	0	1	28	23	50	8e-08	54.5	27	69	1															69	0
NC_000911.1:3326434-3326638	SeqGr46913_1	1	100	28	0	0	119	146	20	47	8e-08	54.5	27	70	0															70	0
NC_000911.1:3326434-3326638	SeqGr31717_1	1	100	28	0	0	28	55	1	28	8e-08	54.5	27	71	0															71	0
NC_000911.1:3326434-3326638	SeqGr311384_1	1	100	29	0	0	177	205	1	29	2e-08	56.4	28	72	0															72	0
NC_000911.1:3326434-3326638	SeqGr291581_1	1	100	29	0	0	177	205	1	29	2e-08	56.4	28	73	0															73	3
NC_000911.1:3326434-3326638	SeqGr287153_1	1	100	29	0	0	177	205	1	29	2e-08	56.4	28	74	0															74	0
NC_000911.1:3326434-3326638	SeqGr286010_1	1	100	29	0	0	177	205	1	29	2e-08	56.4	28	75	0															75	0
NC_000911.1:3326434-3326638	SeqGr276990_1	1	100	29	0	0	177	205	1	29	2e-08	56.4	28	76	0															76	0
NC_000911.1:3326434-3326638	SeqGr253292_1	1	100	29	0	0	177	205	1	29	2e-08	56.4	28	77	0															77	0
NC_000911.1:3326434-3326638	SeqGr234472_1	1	100	29	0	0	177	205	1	29	2e-08	56.4	28	78	0															78	1
NC_000911.1:3326434-3326638	SeqGr214470_1	1	100	29	0	0	137	165	1	29	2e-08	56.4	28	79	0															79	6
NC_000911.1:3326434-3326638	SeqGr195743_1	1	100	29	0	0	119	147	22	50	2e-08	56.4	28	80	0															80	0
NC_000911.1:3326434-3326638	SeqGr168568_1	1	100	29	0	0	177	205	1	29	2e-08	56.4	28	81	0															81	0
NC_000911.1:3326434-3326638	SeqGr162196_1	1	100	29	0	0	168	196	22	50	2e-08	56.4	28	82	1															82	0
NC_000911.1:3326434-3326638	SeqGr157383_1	1	100	29	0	0	119	147	22	50	2e-08	56.4	28	83	0															83	0
NC_000911.1:3326434-3326638	SeqGr131810_1	1	100	29	0	0	124	152	22	50	2e-08	56.4	28	84	0															84	1
NC_000911.1:3326434-3326638	SeqGr127312_1	1	100	29	0	0	177	205	1	29	2e-08	56.4	28	85	0															85	0
NC_000911.1:3326434-3326638	SeqGr107615_1	1	100	29	0	0	177	205	1	29	2e-08	56.4	28	86	0															86	0
NC_000911.1:3326434-3326638	SeqGr91096_1	1	100	29	0	0	177	205	1	29	2e-08	56.4	28	87	0															87	0
NC_000911.1:3326434-3326638	SeqGr57272_1	1	100	29	0	0	131	159	22	50	2e-08	56.4	28	88	0															88	0
NC_000911.1:3326434-3326638	SeqGr52941_1	1	100	29	0	0	177	205	1	29	2e-08	56.4	28	89	0															89	4
NC_000911.1:3326434-3326638	SeqGr223_1	1	100	29	0	0	177	205	1	29	2e-08	56.4	28	90	0															90	0
NC_000911.1:3326434-3326638	SeqGr177413_1	1	96.55	29	1	0	177	205	1	29	1e-06	50.7	28	91	0															91	0
NC_000911.1:3326434-3326638	SeqGr174526_1	1	96.55	29	1	0	177	205	1	29	1e-06	50.7	28	92	0															92	0
NC_000911.1:3326434-3326638	SeqGr147959_1	1	96.55	29	1	0	177	205	1	29	1e-06	50.7	28	93	0															93	0
NC_000911.1:3326434-3326638	SeqGr328852_1	1	100	30	0	0	117	146	18	47	5e-09	58.4	29	94	0															94	0
NC_000911.1:3326434-3326638	SeqGr312126_1	1	100	30	0	0	132	161	21	50	5e-09	58.4	29	95	0															95	0
NC_000911.1:3326434-3326638	SeqGr288154_1	1	100	30	0	0	1	30	21	50	5e-09	58.4	29	96	0															96	0
NC_000911.1:3326434-3326638	SeqGr267086_1	1	100	30	0	0	117	146	21	50	5e-09	58.4	29	97	0															97	0
NC_000911.1:3326434-3326638	SeqGr246538_1	1	100	30	0	0	1	30	21	50	5e-09	58.4	29	98	0															98	1
NC_000911.1:3326434-3326638	SeqGr231765_1	1	100	30	0	0	119	148	21	50	5e-09	58.4	29	99	0															99	0
NC_000911.1:3326434-3326638	SeqGr218628_1	1	100	30	0	0	39	68	1	30	5e-09	58.4	29	100	0															100	2
NC_000911.1:3326434-3326638	SeqGr100694_1	1	100	30	0	0	142	171	21	50	5e-09	58.4	29	101	0															101	0
NC_000911.1:3326434-3326638	SeqGr37707_1	1	100	30	0	0	126	155	21	50	5e-09	58.4	29	102	0															102	0
NC_000911.1:3326434-3326638	SeqGr30387_1	1	100	30	0	0	126	155	21	50	5e-09	58.4	29	103	0															103	1
NC_000911.1:3326434-3326638	SeqGr25221_1	1	96.67	30	1	0	121	150	21	50	3e-07	52.6	29	104	0															104	0
NC_000911.1:3326434-3326638	SeqGr325981_1	1	100	31	0	0	175	205	1	31	1e-09	60.3	30	105	1															105	0
NC_000911.1:3326434-3326638	SeqGr288485_1	1	100	31	0	0	130	160	20	50	1e-09	60.3	30	106	0															106	2
NC_000911.1:3326434-3326638	SeqGr237494_1	1	100	31	0	0	165	195	20	50	1e-09	60.3	30	107	0															107	0
NC_000911.1:3326434-3326638	SeqGr186747_1	1	100	31	0	0	125	155	20	50	1e-09	60.3	30	108	0															108	7
NC_000911.1:3326434-3326638	SeqGr94895_1	1	100	31	0	0	1	31	20	50	1e-09	60.3	30	109	0															109	0
NC_000911.1:3326434-3326638	SeqGr141900_1	1	96.77	31	1	0	118	148	20	50	8e-08	54.5	30	110	0															110	0
NC_000911.1:3326434-3326638	SeqGr323409_1	1	100	32	0	0	129	160	19	50	4e-10	62.2	31	111	0															111	0
NC_000911.1:3326434-3326638	SeqGr221892_1	1	100	32	0	0	38	69	1	32	4e-10	62.2	31	112	0															112	0
NC_000911.1:3326434-3326638	SeqGr209816_1	1	100	32	0	0	1	32	19	50	4e-10	62.2	31	113	0															113	0
NC_000911.1:3326434-3326638	SeqGr133848_1	1	100	32	0	0	131	162	19	50	4e-10	62.2	31	114	0															114	0
NC_000911.1:3326434-3326638	SeqGr125240_1	1	100	32	0	0	124	155	19	50	4e-10	62.2	31	115	0															115	0
NC_000911.1:3326434-3326638	SeqGr124633_1	1	100	32	0	0	117	148	19	50	4e-10	62.2	31	116	0															116	0
NC_000911.1:3326434-3326638	SeqGr112981_1	1	100	32	0	0	136	167	1	32	4e-10	62.2	31	117	1															117	0
NC_000911.1:3326434-3326638	SeqGr26120_1	1	100	32	0	0	174	205	1	32	4e-10	62.2	31	118	1															118	0
NC_000911.1:3326434-3326638	SeqGr329259_1	1	96.88	32	1	0	122	153	19	50	2e-08	56.4	31	119	1															119	0
NC_000911.1:3326434-3326638	SeqGr328626_1	1	100	33	0	0	121	153	1	33	1e-10	64.1	32	120	0															120	0
NC_000911.1:3326434-3326638	SeqGr234824_1	1	100	33	0	0	6	38	1	33	1e-10	64.1	32	121	0															121	0
NC_000911.1:3326434-3326638	SeqGr165978_1	1	100	33	0	0	21	53	1	33	1e-10	64.1	32	122	0															122	0
NC_000911.1:3326434-3326638	SeqGr145220_1	1	100	33	0	0	1	33	18	50	1e-10	64.1	32	123	0															123	0
NC_000911.1:3326434-3326638	SeqGr92883_1	1	100	33	0	0	131	163	18	50	1e-10	64.1	32	124	0															124	0
NC_000911.1:3326434-3326638	SeqGr63272_1	1	100	33	0	0	126	158	18	50	1e-10	64.1	32	125	0															125	0
NC_000911.1:3326434-3326638	SeqGr108216_1	1	96.97	33	1	0	122	154	18	50	5e-09	58.4	32	126	0															126	0
NC_000911.1:3326434-3326638	SeqGr291053_1	1	100	34	0	0	172	205	5	38	3e-11	66.1	33	127	0															127	0
NC_000911.1:3326434-3326638	SeqGr250588_1	1	100	34	0	0	172	205	1	34	3e-11	66.1	33	128	0															128	0
NC_000911.1:3326434-3326638	SeqGr206539_1	1	100	34	0	0	172	205	4	37	3e-11	66.1	33	129	0															129	0
NC_000911.1:3326434-3326638	SeqGr135341_1	1	100	34	0	0	172	205	1	34	3e-11	66.1	33	130	1															130	0
NC_000911.1:3326434-3326638	SeqGr122989_1	1	100	34	0	0	141	174	1	34	3e-11	66.1	33	131	0															131	0
NC_000911.1:3326434-3326638	SeqGr120506_1	1	100	34	0	0	168	201	17	50	3e-11	66.1	33	132	0															132	0
NC_000911.1:3326434-3326638	SeqGr56185_1	1	100	34	0	0	21	54	1	34	3e-11	66.1	33	133	0															133	0
NC_000911.1:3326434-3326638	SeqGr27373_1	1	100	34	0	0	172	205	1	34	3e-11	66.1	33	134	0															134	0
NC_000911.1:3326434-3326638	SeqGr291015_1	1	97.06	34	1	0	123	156	6	39	1e-09	60.3	33	135	0															135	0
NC_000911.1:3326434-3326638	SeqGr332634_1	1	100	35	0	0	171	205	6	40	7e-12	68	34	136	0															136	0
NC_000911.1:3326434-3326638	SeqGr235074_1	1	100	35	0	0	96	130	1	35	7e-12	68	34	137	0															137	0
NC_000911.1:3326434-3326638	SeqGr229585_1	1	100	35	0	0	131	165	13	47	7e-12	68	34	138	0															138	0
NC_000911.1:3326434-3326638	SeqGr225217_1	1	100	35	0	0	145	179	1	35	7e-12	68	34	139	0															139	0
NC_000911.1:3326434-3326638	SeqGr98366_1	1	100	35	0	0	119	153	16	50	7e-12	68	34	140	0															140	0
NC_000911.1:3326434-3326638	SeqGr67270_1	1	100	35	0	0	119	153	16	50	7e-12	68	34	141	0															141	0
NC_000911.1:3326434-3326638	SeqGr56677_1	1	100	35	0	0	171	205	7	41	7e-12	68	34	142	1															142	0
NC_000911.1:3326434-3326638	SeqGr25046_1	1	100	35	0	0	171	205	1	35	7e-12	68	34	143	2															143	0
NC_000911.1:3326434-3326638	SeqGr222803_1	1	97.14	35	1	0	171	205	1	35	4e-10	62.2	34	144	1															144	0
NC_000911.1:3326434-3326638	SeqGr30031_1	1	97.14	35	1	0	171	205	1	35	4e-10	62.2	34	145	1															145	0
NC_000911.1:3326434-3326638	SeqGr289395_1	1	100	36	0	0	131	166	15	50	2e-12	69.9	35	146	6															146	0
NC_000911.1:3326434-3326638	SeqGr251889_1	1	100	36	0	0	1	36	15	50	2e-12	69.9	35	147	2															147	0
NC_000911.1:3326434-3326638	SeqGr89058_1	1	100	36	0	0	170	205	1	36	2e-12	69.9	35	148	5															148	0
NC_000911.1:3326434-3326638	SeqGr33514_1	1	100	36	0	0	125	160	15	50	2e-12	69.9	35	149	0															149	0
NC_000911.1:3326434-3326638	SeqGr7027_1	1	100	36	0	0	145	180	1	36	2e-12	69.9	35	150	4															150	0
NC_000911.1:3326434-3326638	SeqGr171510_1	1	97.22	36	1	0	119	154	15	50	1e-10	64.1	35	151	4															151	0
NC_000911.1:3326434-3326638	SeqGr238125_1	1	100	37	0	0	119	155	14	50	5e-13	71.8	36	152	3															152	0
NC_000911.1:3326434-3326638	SeqGr223270_1	1	100	37	0	0	1	37	14	50	5e-13	71.8	36	153	5															153	0
NC_000911.1:3326434-3326638	SeqGr134425_1	1	100	37	0	0	119	155	14	50	5e-13	71.8	36	154	3															154	0
NC_000911.1:3326434-3326638	SeqGr100797_1	1	100	37	0	0	169	205	1	37	5e-13	71.8	36	155	6															155	0
NC_000911.1:3326434-3326638	SeqGr331729_1	1	100	38	0	0	126	163	13	50	1e-13	73.7	37	156	4															156	0
NC_000911.1:3326434-3326638	SeqGr302565_1	1	100	38	0	0	1	38	4	41	1e-13	73.7	37	157	1															157	0
NC_000911.1:3326434-3326638	SeqGr252018_1	1	100	38	0	0	119	156	1	38	1e-13	73.7	37	158	1															158	0
NC_000911.1:3326434-3326638	SeqGr238958_1	1	100	38	0	0	1	38	13	50	1e-13	73.7	37	159	1															159	0
NC_000911.1:3326434-3326638	SeqGr233605_1	1	100	38	0	0	119	156	10	47	1e-13	73.7	37	160	6															160	0
NC_000911.1:3326434-3326638	SeqGr171386_1	1	100	38	0	0	123	160	13	50	1e-13	73.7	37	161	5															161	0
NC_000911.1:3326434-3326638	SeqGr143993_1	1	100	38	0	0	131	168	8	45	1e-13	73.7	37	162	5															162	0
NC_000911.1:3326434-3326638	SeqGr115780_1	1	100	38	0	0	168	205	1	38	1e-13	73.7	37	163	2															163	0
NC_000911.1:3326434-3326638	SeqGr87084_1	1	100	38	0	0	168	205	1	38	1e-13	73.7	37	164	0															164	0
NC_000911.1:3326434-3326638	SeqGr15742_1	1	100	38	0	0	119	156	13	50	1e-13	73.7	37	165	6															165	0
NC_000911.1:3326434-3326638	SeqGr307001_1	1	100	39	0	0	131	169	1	39	3e-14	75.7	38	166	1															166	0
NC_000911.1:3326434-3326638	SeqGr286201_1	1	100	39	0	0	112	150	1	39	3e-14	75.7	38	167	2															167	0
NC_000911.1:3326434-3326638	SeqGr254996_1	1	100	39	0	0	167	205	1	39	3e-14	75.7	38	168	1															168	0
NC_000911.1:3326434-3326638	SeqGr251272_1	1	100	39	0	0	124	162	12	50	3e-14	75.7	38	169	1															169	0
NC_000911.1:3326434-3326638	SeqGr235009_1	1	100	39	0	0	141	179	1	39	3e-14	75.7	38	170	1															170	0
NC_000911.1:3326434-3326638	SeqGr200955_1	1	100	39	0	0	16	54	1	39	3e-14	75.7	38	171	2															171	0
NC_000911.1:3326434-3326638	SeqGr89654_1	1	100	39	0	0	167	205	2	40	3e-14	75.7	38	172	0															172	0
NC_000911.1:3326434-3326638	SeqGr1111_1	1	100	39	0	0	167	205	1	39	3e-14	75.7	38	173	1															173	0
NC_000911.1:3326434-3326638	SeqGr241038_1	1	100	40	0	0	123	162	11	50	9e-15	77.6	39	174	1															174	0
NC_000911.1:3326434-3326638	SeqGr102603_1	1	100	40	0	0	166	205	1	40	9e-15	77.6	39	175	1															175	0
NC_000911.1:3326434-3326638	SeqGr52961_1	1	100	40	0	0	140	179	1	40	9e-15	77.6	39	176	1															176	0
NC_000911.1:3326434-3326638	SeqGr33922_1	1	100	40	0	0	166	205	1	40	9e-15	77.6	39	177	1															177	0
NC_000911.1:3326434-3326638	SeqGr2034_1	1	100	40	0	0	166	205	1	40	9e-15	77.6	39	178	0															178	0
NC_000911.1:3326434-3326638	SeqGr284440_1	1	97.5	40	1	0	166	205	1	40	5e-13	71.8	39	179	8															179	0
NC_000911.1:3326434-3326638	SeqGr185907_1	1	100	41	0	0	111	151	1	41	2e-15	79.5	40	180	9															180	0
NC_000911.1:3326434-3326638	SeqGr25226_1	1	100	41	0	0	165	205	1	41	2e-15	79.5	40	181	4															181	0
NC_000911.1:3326434-3326638	SeqGr258442_1	1	100	42	0	0	119	160	9	50	6e-16	81.4	41	182	0															182	0
NC_000911.1:3326434-3326638	SeqGr97161_1	1	100	42	0	0	164	205	1	42	6e-16	81.4	41	183	1															183	0
NC_000911.1:3326434-3326638	SeqGr323719_1	1	100	43	0	0	1	43	5	47	2e-16	83.4	42	184	0															184	0
NC_000911.1:3326434-3326638	SeqGr74694_1	1	100	43	0	0	163	205	1	43	2e-16	83.4	42	185	2															185	0
NC_000911.1:3326434-3326638	SeqGr39907_1	1	100	43	0	0	120	162	8	50	2e-16	83.4	42	186	1															186	0
NC_000911.1:3326434-3326638	SeqGr312401_1	1	100	44	0	0	136	179	1	44	4e-17	85.3	43	187	1															187	0
NC_000911.1:3326434-3326638	SeqGr165528_1	1	100	44	0	0	137	180	1	44	4e-17	85.3	43	188	1															188	0
NC_000911.1:3326434-3326638	SeqGr148723_1	1	100	44	0	0	1	44	2	45	4e-17	85.3	43	189	1															189	0
NC_000911.1:3326434-3326638	SeqGr68180_1	1	100	44	0	0	136	179	1	44	4e-17	85.3	43	190	2															190	0
NC_000911.1:3326434-3326638	SeqGr50103_1	1	100	44	0	0	162	205	1	44	4e-17	85.3	43	191	0															191	0
NC_000911.1:3326434-3326638	SeqGr265305_1	1	100	45	0	0	161	205	1	45	1e-17	87.2	44	192	0															192	0
NC_000911.1:3326434-3326638	SeqGr146359_1	1	100	45	0	0	135	179	1	45	1e-17	87.2	44	193	2															193	0
NC_000911.1:3326434-3326638	SeqGr90244_1	1	100	45	0	0	1	45	6	50	1e-17	87.2	44	194	0															194	0
NC_000911.1:3326434-3326638	SeqGr214827_1	1	97.78	45	1	0	1	45	6	50	6e-16	81.4	44	195	1															195	0
NC_000911.1:3326434-3326638	SeqGr305413_1	1	100	46	0	0	135	180	1	46	3e-18	89.1	45	196	1															196	0
NC_000911.1:3326434-3326638	SeqGr277924_1	1	100	46	0	0	160	205	1	46	3e-18	89.1	45	197	0															197	0
NC_000911.1:3326434-3326638	SeqGr171484_1	1	100	46	0	0	1	46	5	50	3e-18	89.1	45	198	0															198	0
NC_000911.1:3326434-3326638	SeqGr150388_1	1	100	46	0	0	135	180	1	46	3e-18	89.1	45	199	0															199	0
NC_000911.1:3326434-3326638	SeqGr212336_1	1	100	47	0	0	135	181	1	47	8e-19	91.1	46	200	0															200	0
NC_000911.1:3326434-3326638	SeqGr10438_1	1	100	47	0	0	159	205	1	47	8e-19	91.1	46	201	2															201	0
NC_000911.1:3326434-3326638	SeqGr9091_1	1	100	47	0	0	135	181	1	47	8e-19	91.1	46	202	0															202	0
NC_000911.1:3326434-3326638	SeqGr6326_1	1	100	47	0	0	119	165	1	47	8e-19	91.1	46	203	1															203	0
NC_000911.1:3326434-3326638	SeqGr232670_1	1	97.87	47	1	0	119	165	1	47	4e-17	85.3	46	204	1															204	0
NC_000911.1:3326434-3326638	SeqGr175440_1	1	97.87	47	1	0	135	181	1	47	4e-17	85.3	46	205	89															205	0
NC_000911.1:3326434-3326638	SeqGr308971_1	1	100	48	0	0	158	205	1	48	2e-19	93	47		0																0
NC_000911.1:3326434-3326638	SeqGr26559_1	1	100	48	0	0	158	205	1	48	2e-19	93	47
NC_000911.1:3326434-3326638	SeqGr216985_1	1	100	49	0	0	119	167	2	50	5e-20	94.9	48
NC_000911.1:3326434-3326638	SeqGr77971_1	1	100	49	0	0	137	185	2	50	5e-20	94.9	48
NC_000911.1:3326434-3326638	SeqGr15271_1	1	100	49	0	0	157	205	1	49	5e-20	94.9	48
NC_000911.1:3326434-3326638	SeqGr151959_1	1	97.96	49	1	0	157	205	1	49	3e-18	89.1	48
NC_000911.1:3326434-3326638	SeqGr303947_1	1	100	50	0	0	56	105	1	50	1e-20	96.8	49
NC_000911.1:3326434-3326638	SeqGr274756_1	1	100	50	0	0	70	119	1	50	1e-20	96.8	49
NC_000911.1:3326434-3326638	SeqGr271944_1	1	100	50	0	0	144	193	1	50	1e-20	96.8	49
NC_000911.1:3326434-3326638	SeqGr257182_1	1	100	50	0	0	68	117	1	50	1e-20	96.8	49
NC_000911.1:3326434-3326638	SeqGr247123_1	1	100	50	0	0	33	82	1	50	1e-20	96.8	49
NC_000911.1:3326434-3326638	SeqGr214655_1	1	100	50	0	0	138	187	1	50	1e-20	96.8	49
NC_000911.1:3326434-3326638	SeqGr197338_1	1	100	50	0	0	69	118	1	50	1e-20	96.8	49
NC_000911.1:3326434-3326638	SeqGr192550_1	1	100	50	0	0	111	160	1	50	1e-20	96.8	49
NC_000911.1:3326434-3326638	SeqGr159468_1	1	100	50	0	0	154	203	1	50	1e-20	96.8	49
NC_000911.1:3326434-3326638	SeqGr148733_1	1	100	50	0	0	155	204	1	50	1e-20	96.8	49
NC_000911.1:3326434-3326638	SeqGr118434_1	1	100	50	0	0	132	181	1	50	1e-20	96.8	49
NC_000911.1:3326434-3326638	SeqGr113793_1	1	100	50	0	0	127	176	1	50	1e-20	96.8	49
NC_000911.1:3326434-3326638	SeqGr99363_1	1	100	50	0	0	140	189	1	50	1e-20	96.8	49
NC_000911.1:3326434-3326638	SeqGr96613_1	1	100	50	0	0	128	177	1	50	1e-20	96.8	49
NC_000911.1:3326434-3326638	SeqGr95760_1	1	100	50	0	0	139	188	1	50	1e-20	96.8	49
NC_000911.1:3326434-3326638	SeqGr80278_1	1	100	50	0	0	156	205	1	50	1e-20	96.8	49
NC_000911.1:3326434-3326638	SeqGr70912_1	1	100	50	0	0	134	183	1	50	1e-20	96.8	49
NC_000911.1:3326434-3326638	SeqGr44514_1	1	100	50	0	0	136	185	1	50	1e-20	96.8	49
NC_000911.1:3326434-3326638	SeqGr36828_1	1	100	50	0	0	121	170	1	50	1e-20	96.8	49
NC_000911.1:3326434-3326638	SeqGr35094_1	1	100	50	0	0	124	173	1	50	1e-20	96.8	49
NC_000911.1:3326434-3326638	SeqGr13002_1	1	100	50	0	0	122	171	1	50	1e-20	96.8	49
NC_000911.1:3326434-3326638	SeqGr8337_1	1	100	50	0	0	131	180	1	50	1e-20	96.8	49
NC_000911.1:3326434-3326638	SeqGr6934_1	1	100	50	0	0	141	190	1	50	1e-20	96.8	49
NC_000911.1:3326434-3326638	SeqGr6072_1	1	100	50	0	0	126	175	1	50	1e-20	96.8	49
NC_000911.1:3326434-3326638	SeqGr4261_1	1	100	50	0	0	137	186	1	50	1e-20	96.8	49
NC_000911.1:3326434-3326638	SeqGr1773_1	1	100	50	0	0	112	161	1	50	1e-20	96.8	49
NC_000911.1:3326434-3326638	SeqGr201925_1	1	98	50	1	0	131	180	1	50	8e-19	91.1	49
NC_000911.1:3326434-3326638	SeqGr149390_1	1	98	50	1	0	105	154	1	50	8e-19	91.1	49
NC_000911.1:3326434-3326638	SeqGr142228_1	1	98	50	1	0	112	161	1	50	8e-19	91.1	49
NC_000911.1:3326434-3326638	SeqGr105241_1	1	98	50	1	0	131	180	1	50	8e-19	91.1	49
NC_000911.1:3326434-3326638	SeqGr75586_1	1	98	50	1	0	112	161	1	50	8e-19	91.1	49
NC_000911.1:3326434-3326638	SeqGr45020_1	1	98	50	1	0	131	180	1	50	8e-19	91.1	49
NC_000911.1:3326434-3326638	SeqGr227615_1	1	92	50	4	0	112	161	1	50	1e-13	73.7	49

## Sheet: Ssp286
Query	DbSeq	Count	%match	matchLen	NumMismatch	GO	q.start	q.end	dbSeqStart	dbSeqEnd	evalue	bitScore	forward	Site	Count of mapped 3' end	Query	DbSeq	Count	%match	matchLen	NumMismatch	GO	q.start	q.end	dbSeqStart	dbSeqEnd	evalue	bitScore	forward	Site	Count of mapped 3' end
NC_000911.1:3326434-3326638	SeqGr143978_1	1	100	25	0	0	119	143	2	26	6e-06	48.8	24	1	0	NC_000911.1:3326434-3326638	SeqGr233540_1	1	96	50	2	0	51	100	50	1	6e-17	85.3	-49	1	0
NC_000911.1:3326434-3326638	SeqGr462583_1	1	100	25	0	0	157	181	23	47	6e-06	48.8	24	2	0	NC_000911.1:3326434-3326638	SeqGr86076_1	1	94	50	3	0	56	105	50	1	3e-15	79.5	-49	2	0
NC_000911.1:3326434-3326638	SeqGr454680_1	1	100	25	0	0	177	201	1	25	6e-06	48.8	24	3	0	NC_000911.1:3326434-3326638	SeqGr79541_1	1	94	50	3	0	51	100	50	1	3e-15	79.5	-49	3	0
NC_000911.1:3326434-3326638	SeqGr415588_1	1	100	25	0	0	181	205	2	26	6e-06	48.8	24	4	0	NC_000911.1:3326434-3326638	SeqGr35762_1	1	94	50	3	0	59	108	50	1	3e-15	79.5	-49	4	0
NC_000911.1:3326434-3326638	SeqGr380709_1	1	100	25	0	0	119	143	26	50	6e-06	48.8	24	5	0	NC_000911.1:3326434-3326638	SeqGr337745_1	1	86	50	7	0	51	100	50	1	3e-08	56.4	-49	5	0
NC_000911.1:3326434-3326638	SeqGr367298_1	1	100	25	0	0	180	204	1	25	6e-06	48.8	24	6	0	NC_000911.1:3326434-3326638	SeqGr178705_1	1	93.88	49	3	0	60	108	50	2	1e-14	77.6	-48	6	0
NC_000911.1:3326434-3326638	SeqGr338845_1	1	100	25	0	0	1	25	26	50	6e-06	48.8	24	7	0	NC_000911.1:3326434-3326638	SeqGr376677_1	1	93.75	48	3	0	61	108	50	3	5e-14	75.7	-47	7	0
NC_000911.1:3326434-3326638	SeqGr310468_1	1	100	25	0	0	119	143	26	50	6e-06	48.8	24	8	0	NC_000911.1:3326434-3326638	SeqGr373247_1	1	93.62	47	3	0	54	100	47	1	2e-13	73.7	-46	8	0
NC_000911.1:3326434-3326638	SeqGr304109_1	1	100	25	0	0	119	143	26	50	6e-06	48.8	24	9	0	NC_000911.1:3326434-3326638	SeqGr293431_1	1	93.62	47	3	0	57	103	47	1	2e-13	73.7	-46	9	0
NC_000911.1:3326434-3326638	SeqGr242284_1	1	100	25	0	0	126	150	26	50	6e-06	48.8	24	10	0	NC_000911.1:3326434-3326638	SeqGr136804_1	1	85.11	47	7	0	60	106	50	4	2e-06	50.7	-46	10	0
NC_000911.1:3326434-3326638	SeqGr225708_1	1	100	25	0	0	131	155	26	50	6e-06	48.8	24	11	0	NC_000911.1:3326434-3326638	SeqGr272760_1	1	95.65	46	2	0	55	100	46	1	1e-14	77.6	-45	11	0
NC_000911.1:3326434-3326638	SeqGr207303_1	1	100	25	0	0	126	150	26	50	6e-06	48.8	24	12	0	NC_000911.1:3326434-3326638	SeqGr365029_1	1	84.78	46	7	0	61	106	50	5	6e-06	48.8	-45	12	0
NC_000911.1:3326434-3326638	SeqGr167374_1	1	100	25	0	0	177	201	26	50	6e-06	48.8	24	13	0	NC_000911.1:3326434-3326638	SeqGr404630_1	1	95.45	44	2	0	65	108	44	1	2e-13	73.7	-43	13	0
NC_000911.1:3326434-3326638	SeqGr155081_1	1	100	25	0	0	181	205	1	25	6e-06	48.8	24	14	0	NC_000911.1:3326434-3326638	SeqGr239507_1	1	95.45	44	2	0	65	108	44	1	2e-13	73.7	-43	14	0
NC_000911.1:3326434-3326638	SeqGr126272_1	1	100	25	0	0	119	143	26	50	6e-06	48.8	24	15	0	NC_000911.1:3326434-3326638	SeqGr50578_1	1	95.45	44	2	0	65	108	46	3	2e-13	73.7	-43	15	0
NC_000911.1:3326434-3326638	SeqGr1877_1	1	100	25	0	0	181	205	23	47	6e-06	48.8	24	16	0	NC_000911.1:3326434-3326638	SeqGr455339_1	1	93.18	44	3	0	60	103	44	1	1e-11	68	-43	16	0
NC_000911.1:3326434-3326638	SeqGr462744_1	1	100	26	0	0	180	205	1	26	2e-06	50.7	25	17	0	NC_000911.1:3326434-3326638	SeqGr232318_1	1	95.35	43	2	0	66	108	43	1	7e-13	71.8	-42	17	0
NC_000911.1:3326434-3326638	SeqGr445163_1	1	100	26	0	0	180	205	1	26	2e-06	50.7	25	18	0	NC_000911.1:3326434-3326638	SeqGr423467_1	1	93.02	43	3	0	47	89	43	1	4e-11	66.1	-42	18	0
NC_000911.1:3326434-3326638	SeqGr427564_1	1	100	26	0	0	180	205	1	26	2e-06	50.7	25	19	0	NC_000911.1:3326434-3326638	SeqGr421516_1	1	94.87	39	2	0	65	103	39	1	1e-10	64.1	-38	19	0
NC_000911.1:3326434-3326638	SeqGr423369_1	1	100	26	0	0	180	205	22	47	2e-06	50.7	25	20	0	NC_000911.1:3326434-3326638	SeqGr27813_1	1	94.12	34	2	0	75	108	34	1	1e-07	54.5	-33	20	0
NC_000911.1:3326434-3326638	SeqGr405782_1	1	100	26	0	0	180	205	1	26	2e-06	50.7	25	21	0	NC_000911.1:3326434-3326638	SeqGr315265_1	1	96.97	33	1	0	47	79	44	12	8e-09	58.4	-32	21	0
NC_000911.1:3326434-3326638	SeqGr387750_1	1	100	26	0	0	180	205	1	26	2e-06	50.7	25	22	0	NC_000911.1:3326434-3326638	SeqGr274403_1	1	96.97	33	1	0	47	79	43	11	8e-09	58.4	-32	22	0
NC_000911.1:3326434-3326638	SeqGr360364_1	1	100	26	0	0	180	205	1	26	2e-06	50.7	25	23	0	NC_000911.1:3326434-3326638	SeqGr205733_1	1	96.97	33	1	0	47	79	33	1	8e-09	58.4	-32	23	0
NC_000911.1:3326434-3326638	SeqGr352798_1	1	100	26	0	0	180	205	1	26	2e-06	50.7	25	24	0	NC_000911.1:3326434-3326638	SeqGr33119_1	1	96.97	33	1	0	47	79	44	12	8e-09	58.4	-32	24	0
NC_000911.1:3326434-3326638	SeqGr329639_1	1	100	26	0	0	180	205	1	26	2e-06	50.7	25	25	1	NC_000911.1:3326434-3326638	SeqGr269285_1	1	93.94	33	2	0	47	79	35	3	4e-07	52.6	-32	25	0
NC_000911.1:3326434-3326638	SeqGr319749_1	1	100	26	0	0	180	205	1	26	2e-06	50.7	25	26	2	NC_000911.1:3326434-3326638	SeqGr418367_1	1	96.88	32	1	0	47	78	32	1	3e-08	56.4	-31	26	0
NC_000911.1:3326434-3326638	SeqGr317590_1	1	100	26	0	0	118	143	25	50	2e-06	50.7	25	27	1	NC_000911.1:3326434-3326638	SeqGr403889_1	1	93.55	31	2	0	59	89	33	3	6e-06	48.8	-30	27	0
NC_000911.1:3326434-3326638	SeqGr312273_1	1	100	26	0	0	180	205	1	26	2e-06	50.7	25	28	1	NC_000911.1:3326434-3326638	SeqGr234214_1	1	96.55	29	1	0	51	79	40	12	2e-06	50.7	-28	28	0
NC_000911.1:3326434-3326638	SeqGr310965_1	1	100	26	0	0	131	156	25	50	2e-06	50.7	25	29	1	NC_000911.1:3326434-3326638	SeqGr415400_1	1	96.43	28	1	0	52	79	39	12	6e-06	48.8	-27	29	0
NC_000911.1:3326434-3326638	SeqGr300592_1	1	100	26	0	0	180	205	1	26	2e-06	50.7	25	30	0	NC_000911.1:3326434-3326638	SeqGr456909_1	1	100	27	0	0	47	73	28	2	4e-07	52.6	-26	30	0
NC_000911.1:3326434-3326638	SeqGr298092_1	1	100	26	0	0	125	150	25	50	2e-06	50.7	25	31	1	NC_000911.1:3326434-3326638	SeqGr253408_1	1	100	27	0	0	47	73	29	3	4e-07	52.6	-26	31	0
NC_000911.1:3326434-3326638	SeqGr294999_1	1	100	26	0	0	180	205	1	26	2e-06	50.7	25	32	1	NC_000911.1:3326434-3326638	SeqGr233142_1	1	100	27	0	0	47	73	30	4	4e-07	52.6	-26	32	0
NC_000911.1:3326434-3326638	SeqGr284979_1	1	100	26	0	0	180	205	1	26	2e-06	50.7	25	33	1	NC_000911.1:3326434-3326638	SeqGr350068_1	1	100	25	0	0	49	73	26	2	6e-06	48.8	-24	33	0
NC_000911.1:3326434-3326638	SeqGr281182_1	1	100	26	0	0	180	205	1	26	2e-06	50.7	25	34	0															34	0
NC_000911.1:3326434-3326638	SeqGr280096_1	1	100	26	0	0	180	205	1	26	2e-06	50.7	25	35	0															35	0
NC_000911.1:3326434-3326638	SeqGr234311_1	1	100	26	0	0	180	205	24	49	2e-06	50.7	25	36	0															36	0
NC_000911.1:3326434-3326638	SeqGr230706_1	1	100	26	0	0	141	166	25	50	2e-06	50.7	25	37	0															37	0
NC_000911.1:3326434-3326638	SeqGr223400_1	1	100	26	0	0	180	205	1	26	2e-06	50.7	25	38	2															38	0
NC_000911.1:3326434-3326638	SeqGr205158_1	1	100	26	0	0	125	150	25	50	2e-06	50.7	25	39	0															39	0
NC_000911.1:3326434-3326638	SeqGr190389_1	1	100	26	0	0	177	202	1	26	2e-06	50.7	25	40	0															40	0
NC_000911.1:3326434-3326638	SeqGr189309_1	1	100	26	0	0	180	205	1	26	2e-06	50.7	25	41	1															41	0
NC_000911.1:3326434-3326638	SeqGr180710_1	1	100	26	0	0	180	205	1	26	2e-06	50.7	25	42	0															42	0
NC_000911.1:3326434-3326638	SeqGr164851_1	1	100	26	0	0	1	26	14	39	2e-06	50.7	25	43	3															43	0
NC_000911.1:3326434-3326638	SeqGr143978_1	1	100	26	0	0	141	166	25	50	2e-06	50.7	25	44	0															44	0
NC_000911.1:3326434-3326638	SeqGr140905_1	1	100	26	0	0	180	205	1	26	2e-06	50.7	25	45	1															45	0
NC_000911.1:3326434-3326638	SeqGr139620_1	1	100	26	0	0	180	205	1	26	2e-06	50.7	25	46	0															46	0
NC_000911.1:3326434-3326638	SeqGr138017_1	1	100	26	0	0	180	205	1	26	2e-06	50.7	25	47	0															47	0
NC_000911.1:3326434-3326638	SeqGr130142_1	1	100	26	0	0	180	205	1	26	2e-06	50.7	25	48	2															48	0
NC_000911.1:3326434-3326638	SeqGr127994_1	1	100	26	0	0	180	205	1	26	2e-06	50.7	25	49	1															49	0
NC_000911.1:3326434-3326638	SeqGr120181_1	1	100	26	0	0	180	205	1	26	2e-06	50.7	25	50	2															50	0
NC_000911.1:3326434-3326638	SeqGr115245_1	1	100	26	0	0	180	205	1	26	2e-06	50.7	25	51	0															51	0
NC_000911.1:3326434-3326638	SeqGr110927_1	1	100	26	0	0	180	205	1	26	2e-06	50.7	25	52	0															52	0
NC_000911.1:3326434-3326638	SeqGr109676_1	1	100	26	0	0	1	26	25	50	2e-06	50.7	25	53	2															53	0
NC_000911.1:3326434-3326638	SeqGr77197_1	1	100	26	0	0	118	143	25	50	2e-06	50.7	25	54	4															54	0
NC_000911.1:3326434-3326638	SeqGr41720_1	1	100	26	0	0	180	205	1	26	2e-06	50.7	25	55	2															55	0
NC_000911.1:3326434-3326638	SeqGr16350_1	1	100	26	0	0	180	205	12	37	2e-06	50.7	25	56	2															56	0
NC_000911.1:3326434-3326638	SeqGr15676_1	1	100	26	0	0	180	205	1	26	2e-06	50.7	25	57	0															57	0
NC_000911.1:3326434-3326638	SeqGr14979_1	1	100	26	0	0	180	205	1	26	2e-06	50.7	25	58	0															58	0
NC_000911.1:3326434-3326638	SeqGr2484_1	1	100	26	0	0	180	205	1	26	2e-06	50.7	25	59	0															59	0
NC_000911.1:3326434-3326638	SeqGr460482_1	1	100	27	0	0	177	203	24	50	4e-07	52.6	26	60	0															60	0
NC_000911.1:3326434-3326638	SeqGr451999_1	1	100	27	0	0	177	203	24	50	4e-07	52.6	26	61	0															61	0
NC_000911.1:3326434-3326638	SeqGr441105_1	1	100	27	0	0	153	179	1	27	4e-07	52.6	26	62	0															62	0
NC_000911.1:3326434-3326638	SeqGr436922_1	1	100	27	0	0	141	167	7	33	4e-07	52.6	26	63	0															63	0
NC_000911.1:3326434-3326638	SeqGr432990_1	1	100	27	0	0	177	203	1	27	4e-07	52.6	26	64	0															64	0
NC_000911.1:3326434-3326638	SeqGr416366_1	1	100	27	0	0	179	205	1	27	4e-07	52.6	26	65	0															65	0
NC_000911.1:3326434-3326638	SeqGr392315_1	1	100	27	0	0	179	205	3	29	4e-07	52.6	26	66	1															66	0
NC_000911.1:3326434-3326638	SeqGr359724_1	1	100	27	0	0	117	143	24	50	4e-07	52.6	26	67	0															67	0
NC_000911.1:3326434-3326638	SeqGr343898_1	1	100	27	0	0	153	179	1	27	4e-07	52.6	26	68	0															68	0
NC_000911.1:3326434-3326638	SeqGr343034_1	1	100	27	0	0	179	205	1	27	4e-07	52.6	26	69	0															69	0
NC_000911.1:3326434-3326638	SeqGr342952_1	1	100	27	0	0	24	50	1	27	4e-07	52.6	26	70	0															70	0
NC_000911.1:3326434-3326638	SeqGr339287_1	1	100	27	0	0	126	152	24	50	4e-07	52.6	26	71	0															71	0
NC_000911.1:3326434-3326638	SeqGr247785_1	1	100	27	0	0	153	179	1	27	4e-07	52.6	26	72	0															72	0
NC_000911.1:3326434-3326638	SeqGr226183_1	1	100	27	0	0	126	152	24	50	4e-07	52.6	26	73	0															73	4
NC_000911.1:3326434-3326638	SeqGr181214_1	1	100	27	0	0	22	48	1	27	4e-07	52.6	26	74	0															74	0
NC_000911.1:3326434-3326638	SeqGr161239_1	1	100	27	0	0	122	148	24	50	4e-07	52.6	26	75	0															75	0
NC_000911.1:3326434-3326638	SeqGr94105_1	1	100	27	0	0	1	27	24	50	4e-07	52.6	26	76	0															76	0
NC_000911.1:3326434-3326638	SeqGr87738_1	1	100	27	0	0	126	152	24	50	4e-07	52.6	26	77	0															77	0
NC_000911.1:3326434-3326638	SeqGr84448_1	1	100	27	0	0	126	152	24	50	4e-07	52.6	26	78	0															78	1
NC_000911.1:3326434-3326638	SeqGr29301_1	1	100	27	0	0	119	145	24	50	4e-07	52.6	26	79	1															79	7
NC_000911.1:3326434-3326638	SeqGr425855_1	1	100	28	0	0	122	149	1	28	1e-07	54.5	27	80	0															80	0
NC_000911.1:3326434-3326638	SeqGr378814_1	1	100	28	0	0	178	205	1	28	1e-07	54.5	27	81	0															81	0
NC_000911.1:3326434-3326638	SeqGr363288_1	1	100	28	0	0	178	205	9	36	1e-07	54.5	27	82	0															82	0
NC_000911.1:3326434-3326638	SeqGr350185_1	1	100	28	0	0	119	146	20	47	1e-07	54.5	27	83	0															83	0
NC_000911.1:3326434-3326638	SeqGr335822_1	1	100	28	0	0	119	146	20	47	1e-07	54.5	27	84	0															84	0
NC_000911.1:3326434-3326638	SeqGr150641_1	1	100	28	0	0	112	139	1	28	1e-07	54.5	27	85	0															85	0
NC_000911.1:3326434-3326638	SeqGr150332_1	1	100	28	0	0	126	153	23	50	1e-07	54.5	27	86	0															86	0
NC_000911.1:3326434-3326638	SeqGr128511_1	1	100	28	0	0	178	205	1	28	1e-07	54.5	27	87	0															87	0
NC_000911.1:3326434-3326638	SeqGr97180_1	1	100	28	0	0	178	205	1	28	1e-07	54.5	27	88	1															88	0
NC_000911.1:3326434-3326638	SeqGr5550_1	1	100	28	0	0	1	28	23	50	1e-07	54.5	27	89	0															89	2
NC_000911.1:3326434-3326638	SeqGr228687_1	1	96.43	28	1	0	177	204	1	28	6e-06	48.8	27	90	0															90	0
NC_000911.1:3326434-3326638	SeqGr465061_1	1	100	29	0	0	177	205	1	29	3e-08	56.4	28	91	0															91	0
NC_000911.1:3326434-3326638	SeqGr461519_1	1	100	29	0	0	177	205	1	29	3e-08	56.4	28	92	0															92	0
NC_000911.1:3326434-3326638	SeqGr461094_1	1	100	29	0	0	177	205	1	29	3e-08	56.4	28	93	0															93	0
NC_000911.1:3326434-3326638	SeqGr443265_1	1	100	29	0	0	119	147	22	50	3e-08	56.4	28	94	0															94	0
NC_000911.1:3326434-3326638	SeqGr427705_1	1	100	29	0	0	177	205	1	29	3e-08	56.4	28	95	1															95	0
NC_000911.1:3326434-3326638	SeqGr405651_1	1	100	29	0	0	177	205	21	49	3e-08	56.4	28	96	0															96	0
NC_000911.1:3326434-3326638	SeqGr394038_1	1	100	29	0	0	177	205	1	29	3e-08	56.4	28	97	0															97	0
NC_000911.1:3326434-3326638	SeqGr389462_1	1	100	29	0	0	1	29	20	48	3e-08	56.4	28	98	0															98	0
NC_000911.1:3326434-3326638	SeqGr387836_1	1	100	29	0	0	177	205	1	29	3e-08	56.4	28	99	0															99	0
NC_000911.1:3326434-3326638	SeqGr378873_1	1	100	29	0	0	137	165	1	29	3e-08	56.4	28	100	0															100	5
NC_000911.1:3326434-3326638	SeqGr354379_1	1	100	29	0	0	177	205	1	29	3e-08	56.4	28	101	0															101	0
NC_000911.1:3326434-3326638	SeqGr354131_1	1	100	29	0	0	119	147	22	50	3e-08	56.4	28	102	0															102	0
NC_000911.1:3326434-3326638	SeqGr305133_1	1	100	29	0	0	177	205	1	29	3e-08	56.4	28	103	0															103	3
NC_000911.1:3326434-3326638	SeqGr279008_1	1	100	29	0	0	117	145	22	50	3e-08	56.4	28	104	0															104	0
NC_000911.1:3326434-3326638	SeqGr275365_1	1	100	29	0	0	98	126	22	50	3e-08	56.4	28	105	1															105	1
NC_000911.1:3326434-3326638	SeqGr262558_1	1	100	29	0	0	177	205	1	29	3e-08	56.4	28	106	0															106	2
NC_000911.1:3326434-3326638	SeqGr230575_1	1	100	29	0	0	177	205	1	29	3e-08	56.4	28	107	0															107	0
NC_000911.1:3326434-3326638	SeqGr190492_1	1	100	29	0	0	177	205	1	29	3e-08	56.4	28	108	0															108	8
NC_000911.1:3326434-3326638	SeqGr186913_1	1	100	29	0	0	159	187	1	29	3e-08	56.4	28	109	0															109	0
NC_000911.1:3326434-3326638	SeqGr179143_1	1	100	29	0	0	177	205	1	29	3e-08	56.4	28	110	0															110	0
NC_000911.1:3326434-3326638	SeqGr159262_1	1	100	29	0	0	177	205	1	29	3e-08	56.4	28	111	0															111	0
NC_000911.1:3326434-3326638	SeqGr158676_1	1	100	29	0	0	153	181	1	29	3e-08	56.4	28	112	0															112	0
NC_000911.1:3326434-3326638	SeqGr154285_1	1	100	29	0	0	131	159	22	50	3e-08	56.4	28	113	0															113	0
NC_000911.1:3326434-3326638	SeqGr129587_1	1	100	29	0	0	177	205	1	29	3e-08	56.4	28	114	0															114	0
NC_000911.1:3326434-3326638	SeqGr98925_1	1	100	29	0	0	177	205	20	48	3e-08	56.4	28	115	0															115	0
NC_000911.1:3326434-3326638	SeqGr55553_1	1	100	29	0	0	177	205	1	29	3e-08	56.4	28	116	0															116	0
NC_000911.1:3326434-3326638	SeqGr52598_1	1	100	29	0	0	177	205	1	29	3e-08	56.4	28	117	2															117	0
NC_000911.1:3326434-3326638	SeqGr36008_1	1	100	29	0	0	177	205	1	29	3e-08	56.4	28	118	1															118	0
NC_000911.1:3326434-3326638	SeqGr19811_1	1	100	29	0	0	177	205	1	29	3e-08	56.4	28	119	1															119	0
NC_000911.1:3326434-3326638	SeqGr208726_1	1	96.55	29	1	0	163	191	22	50	2e-06	50.7	28	120	0															120	0
NC_000911.1:3326434-3326638	SeqGr88900_1	1	96.55	29	1	0	177	205	1	29	2e-06	50.7	28	121	0															121	0
NC_000911.1:3326434-3326638	SeqGr57957_1	1	96.55	29	1	0	122	150	22	50	2e-06	50.7	28	122	0															122	0
NC_000911.1:3326434-3326638	SeqGr448242_1	1	100	30	0	0	119	148	21	50	8e-09	58.4	29	123	0															123	0
NC_000911.1:3326434-3326638	SeqGr440218_1	1	100	30	0	0	21	50	1	30	8e-09	58.4	29	124	0															124	0
NC_000911.1:3326434-3326638	SeqGr400015_1	1	100	30	0	0	170	199	21	50	8e-09	58.4	29	125	0															125	0
NC_000911.1:3326434-3326638	SeqGr399209_1	1	100	30	0	0	124	153	21	50	8e-09	58.4	29	126	1															126	0
NC_000911.1:3326434-3326638	SeqGr350487_1	1	100	30	0	0	126	155	1	30	8e-09	58.4	29	127	0															127	0
NC_000911.1:3326434-3326638	SeqGr328050_1	1	100	30	0	0	119	148	21	50	8e-09	58.4	29	128	0															128	0
NC_000911.1:3326434-3326638	SeqGr297260_1	1	100	30	0	0	119	148	21	50	8e-09	58.4	29	129	0															129	0
NC_000911.1:3326434-3326638	SeqGr296892_1	1	100	30	0	0	176	205	10	39	8e-09	58.4	29	130	0															130	0
NC_000911.1:3326434-3326638	SeqGr257179_1	1	100	30	0	0	124	153	21	50	8e-09	58.4	29	131	0															131	0
NC_000911.1:3326434-3326638	SeqGr253684_1	1	100	30	0	0	125	154	21	50	8e-09	58.4	29	132	0															132	0
NC_000911.1:3326434-3326638	SeqGr249692_1	1	100	30	0	0	123	152	21	50	8e-09	58.4	29	133	0															133	0
NC_000911.1:3326434-3326638	SeqGr215166_1	1	100	30	0	0	37	66	1	30	8e-09	58.4	29	134	0															134	0
NC_000911.1:3326434-3326638	SeqGr180204_1	1	100	30	0	0	131	160	21	50	8e-09	58.4	29	135	0															135	0
NC_000911.1:3326434-3326638	SeqGr168948_1	1	100	30	0	0	125	154	21	50	8e-09	58.4	29	136	0															136	0
NC_000911.1:3326434-3326638	SeqGr131672_1	1	100	30	0	0	158	187	1	30	8e-09	58.4	29	137	0															137	0
NC_000911.1:3326434-3326638	SeqGr130764_1	1	100	30	0	0	176	205	3	32	8e-09	58.4	29	138	0															138	0
NC_000911.1:3326434-3326638	SeqGr461886_1	1	96.67	30	1	0	122	151	21	50	4e-07	52.6	29	139	1															139	0
NC_000911.1:3326434-3326638	SeqGr391554_1	1	96.67	30	1	0	121	150	21	50	4e-07	52.6	29	140	0															140	0
NC_000911.1:3326434-3326638	SeqGr52132_1	1	96.67	30	1	0	122	151	17	46	4e-07	52.6	29	141	0															141	0
NC_000911.1:3326434-3326638	SeqGr465409_1	1	100	31	0	0	25	55	1	31	2e-09	60.3	30	142	1															142	0
NC_000911.1:3326434-3326638	SeqGr391286_1	1	100	31	0	0	163	193	1	31	2e-09	60.3	30	143	9															143	0
NC_000911.1:3326434-3326638	SeqGr354486_1	1	100	31	0	0	175	205	1	31	2e-09	60.3	30	144	1															144	0
NC_000911.1:3326434-3326638	SeqGr326899_1	1	100	31	0	0	24	54	1	31	2e-09	60.3	30	145	5															145	0
NC_000911.1:3326434-3326638	SeqGr297725_1	1	100	31	0	0	1	31	20	50	2e-09	60.3	30	146	5															146	0
NC_000911.1:3326434-3326638	SeqGr265244_1	1	100	31	0	0	157	187	1	31	2e-09	60.3	30	147	2															147	0
NC_000911.1:3326434-3326638	SeqGr235440_1	1	100	31	0	0	170	200	20	50	2e-09	60.3	30	148	5															148	0
NC_000911.1:3326434-3326638	SeqGr214550_1	1	100	31	0	0	130	160	20	50	2e-09	60.3	30	149	1															149	0
NC_000911.1:3326434-3326638	SeqGr179195_1	1	100	31	0	0	126	156	1	31	2e-09	60.3	30	150	9															150	0
NC_000911.1:3326434-3326638	SeqGr96117_1	1	100	31	0	0	126	156	1	31	2e-09	60.3	30	151	4															151	0
NC_000911.1:3326434-3326638	SeqGr73083_1	1	100	31	0	0	116	146	17	47	2e-09	60.3	30	152	6															152	0
NC_000911.1:3326434-3326638	SeqGr48956_1	1	100	31	0	0	112	142	1	31	2e-09	60.3	30	153	3															153	0
NC_000911.1:3326434-3326638	SeqGr272577_1	1	96.77	31	1	0	115	145	20	50	1e-07	54.5	30	154	2															154	0
NC_000911.1:3326434-3326638	SeqGr93442_1	1	96.77	31	1	0	118	148	20	50	1e-07	54.5	30	155	6															155	0
NC_000911.1:3326434-3326638	SeqGr272898_1	1	93.55	31	2	0	65	95	3	33	6e-06	48.8	30	156	4															156	0
NC_000911.1:3326434-3326638	SeqGr461559_1	1	100	32	0	0	112	143	1	32	5e-10	62.2	31	157	4															157	0
NC_000911.1:3326434-3326638	SeqGr372861_1	1	100	32	0	0	126	157	19	50	5e-10	62.2	31	158	0															158	0
NC_000911.1:3326434-3326638	SeqGr312561_1	1	100	32	0	0	126	157	19	50	5e-10	62.2	31	159	2															159	0
NC_000911.1:3326434-3326638	SeqGr260275_1	1	100	32	0	0	126	157	19	50	5e-10	62.2	31	160	9															160	0
NC_000911.1:3326434-3326638	SeqGr251459_1	1	100	32	0	0	142	173	16	47	5e-10	62.2	31	161	7															161	0
NC_000911.1:3326434-3326638	SeqGr202968_1	1	100	32	0	0	174	205	1	32	5e-10	62.2	31	162	3															162	0
NC_000911.1:3326434-3326638	SeqGr196373_1	1	100	32	0	0	125	156	19	50	5e-10	62.2	31	163	0															163	0
NC_000911.1:3326434-3326638	SeqGr127987_1	1	100	32	0	0	119	150	19	50	5e-10	62.2	31	164	1															164	0
NC_000911.1:3326434-3326638	SeqGr98592_1	1	100	32	0	0	174	205	1	32	5e-10	62.2	31	165	10															165	0
NC_000911.1:3326434-3326638	SeqGr67249_1	1	100	32	0	0	1	32	19	50	5e-10	62.2	31	166	4															166	0
NC_000911.1:3326434-3326638	SeqGr37148_1	1	100	32	0	0	22	53	1	32	5e-10	62.2	31	167	3															167	0
NC_000911.1:3326434-3326638	SeqGr6179_1	1	100	32	0	0	119	150	19	50	5e-10	62.2	31	168	1															168	0
NC_000911.1:3326434-3326638	SeqGr281215_1	1	96.88	32	1	0	121	152	19	50	3e-08	56.4	31	169	0															169	0
NC_000911.1:3326434-3326638	SeqGr374802_1	1	100	33	0	0	1	33	18	50	1e-10	64.1	32	170	1															170	0
NC_000911.1:3326434-3326638	SeqGr141349_1	1	100	33	0	0	136	168	1	33	1e-10	64.1	32	171	3															171	0
NC_000911.1:3326434-3326638	SeqGr135864_1	1	100	33	0	0	112	144	18	50	1e-10	64.1	32	172	0															172	0
NC_000911.1:3326434-3326638	SeqGr104957_1	1	100	33	0	0	119	151	18	50	1e-10	64.1	32	173	4															173	0
NC_000911.1:3326434-3326638	SeqGr100413_1	1	100	33	0	0	21	53	1	33	1e-10	64.1	32	174	5															174	0
NC_000911.1:3326434-3326638	SeqGr17246_1	1	100	33	0	0	173	205	1	33	1e-10	64.1	32	175	5															175	0
NC_000911.1:3326434-3326638	SeqGr162094_1	1	96.97	33	1	0	47	79	1	33	8e-09	58.4	32	176	1															176	0
NC_000911.1:3326434-3326638	SeqGr457232_1	1	100	34	0	0	171	204	1	34	4e-11	66.1	33	177	1															177	0
NC_000911.1:3326434-3326638	SeqGr440137_1	1	100	34	0	0	21	54	1	34	4e-11	66.1	33	178	1															178	0
NC_000911.1:3326434-3326638	SeqGr392105_1	1	100	34	0	0	141	174	6	39	4e-11	66.1	33	179	15															179	0
NC_000911.1:3326434-3326638	SeqGr317035_1	1	100	34	0	0	172	205	1	34	4e-11	66.1	33	180	4															180	0
NC_000911.1:3326434-3326638	SeqGr135038_1	1	100	34	0	0	21	54	1	34	4e-11	66.1	33	181	7															181	0
NC_000911.1:3326434-3326638	SeqGr124684_1	1	100	34	0	0	172	205	2	35	4e-11	66.1	33	182	1															182	0
NC_000911.1:3326434-3326638	SeqGr85473_1	1	100	34	0	0	172	205	2	35	4e-11	66.1	33	183	3															183	0
NC_000911.1:3326434-3326638	SeqGr23367_1	1	100	34	0	0	172	205	1	34	4e-11	66.1	33	184	0															184	0
NC_000911.1:3326434-3326638	SeqGr424375_1	1	97.06	34	1	0	122	155	17	50	2e-09	60.3	33	185	2															185	0
NC_000911.1:3326434-3326638	SeqGr284882_1	1	97.06	34	1	0	122	155	17	50	2e-09	60.3	33	186	2															186	0
NC_000911.1:3326434-3326638	SeqGr120103_1	1	97.06	34	1	0	172	205	6	39	2e-09	60.3	33	187	6															187	0
NC_000911.1:3326434-3326638	SeqGr449615_1	1	100	35	0	0	21	55	1	35	1e-11	68	34	188	1															188	0
NC_000911.1:3326434-3326638	SeqGr440350_1	1	100	35	0	0	171	205	5	39	1e-11	68	34	189	1															189	0
NC_000911.1:3326434-3326638	SeqGr438749_1	1	100	35	0	0	112	146	1	35	1e-11	68	34	190	1															190	0
NC_000911.1:3326434-3326638	SeqGr425659_1	1	100	35	0	0	126	160	16	50	1e-11	68	34	191	1															191	0
NC_000911.1:3326434-3326638	SeqGr405270_1	1	100	35	0	0	171	205	13	47	1e-11	68	34	192	1															192	0
NC_000911.1:3326434-3326638	SeqGr346644_1	1	100	35	0	0	171	205	8	42	1e-11	68	34	193	2															193	0
NC_000911.1:3326434-3326638	SeqGr311195_1	1	100	35	0	0	171	205	8	42	1e-11	68	34	194	0															194	0
NC_000911.1:3326434-3326638	SeqGr291547_1	1	100	35	0	0	126	160	1	35	1e-11	68	34	195	0															195	0
NC_000911.1:3326434-3326638	SeqGr264337_1	1	100	35	0	0	171	205	5	39	1e-11	68	34	196	1															196	0
NC_000911.1:3326434-3326638	SeqGr253590_1	1	100	35	0	0	111	145	1	35	1e-11	68	34	197	0															197	0
NC_000911.1:3326434-3326638	SeqGr252286_1	1	100	35	0	0	171	205	1	35	1e-11	68	34	198	0															198	0
NC_000911.1:3326434-3326638	SeqGr239360_1	1	100	35	0	0	171	205	6	40	1e-11	68	34	199	2															199	0
NC_000911.1:3326434-3326638	SeqGr237935_1	1	100	35	0	0	126	160	16	50	1e-11	68	34	200	1															200	0
NC_000911.1:3326434-3326638	SeqGr216357_1	1	100	35	0	0	131	165	13	47	1e-11	68	34	201	2															201	0
NC_000911.1:3326434-3326638	SeqGr172296_1	1	100	35	0	0	171	205	16	50	1e-11	68	34	202	3															202	0
NC_000911.1:3326434-3326638	SeqGr148280_1	1	100	35	0	0	171	205	5	39	1e-11	68	34	203	4															203	0
NC_000911.1:3326434-3326638	SeqGr135009_1	1	100	35	0	0	171	205	2	36	1e-11	68	34	204	6															204	0
NC_000911.1:3326434-3326638	SeqGr133387_1	1	100	35	0	0	168	202	1	35	1e-11	68	34	205	113															205	0
NC_000911.1:3326434-3326638	SeqGr97265_1	1	100	35	0	0	112	146	1	35	1e-11	68	34		0																0
NC_000911.1:3326434-3326638	SeqGr93918_1	1	100	35	0	0	20	54	1	35	1e-11	68	34
NC_000911.1:3326434-3326638	SeqGr89482_1	1	100	35	0	0	171	205	7	41	1e-11	68	34
NC_000911.1:3326434-3326638	SeqGr46106_1	1	100	35	0	0	171	205	11	45	1e-11	68	34
NC_000911.1:3326434-3326638	SeqGr35389_1	1	100	35	0	0	171	205	7	41	1e-11	68	34
NC_000911.1:3326434-3326638	SeqGr20179_1	1	100	35	0	0	131	165	16	50	1e-11	68	34
NC_000911.1:3326434-3326638	SeqGr6399_1	1	100	35	0	0	171	205	1	35	1e-11	68	34
NC_000911.1:3326434-3326638	SeqGr390042_1	1	100	36	0	0	21	56	1	36	3e-12	69.9	35
NC_000911.1:3326434-3326638	SeqGr213982_1	1	100	36	0	0	3	38	1	36	3e-12	69.9	35
NC_000911.1:3326434-3326638	SeqGr211819_1	1	100	36	0	0	126	161	15	50	3e-12	69.9	35
NC_000911.1:3326434-3326638	SeqGr200791_1	1	100	36	0	0	141	176	1	36	3e-12	69.9	35
NC_000911.1:3326434-3326638	SeqGr175734_1	1	100	36	0	0	82	117	15	50	3e-12	69.9	35
NC_000911.1:3326434-3326638	SeqGr85077_1	1	100	36	0	0	126	161	1	36	3e-12	69.9	35
NC_000911.1:3326434-3326638	SeqGr370463_1	1	100	37	0	0	123	159	14	50	7e-13	71.8	36
NC_000911.1:3326434-3326638	SeqGr172677_1	1	100	37	0	0	119	155	14	50	7e-13	71.8	36
NC_000911.1:3326434-3326638	SeqGr142862_1	1	100	37	0	0	168	204	1	37	7e-13	71.8	36
NC_000911.1:3326434-3326638	SeqGr10001_1	1	100	37	0	0	119	155	14	50	7e-13	71.8	36
NC_000911.1:3326434-3326638	SeqGr413610_1	1	100	38	0	0	1	38	6	43	2e-13	73.7	37
NC_000911.1:3326434-3326638	SeqGr396485_1	1	100	38	0	0	168	205	1	38	2e-13	73.7	37
NC_000911.1:3326434-3326638	SeqGr256478_1	1	100	38	0	0	168	205	1	38	2e-13	73.7	37
NC_000911.1:3326434-3326638	SeqGr192547_1	1	100	38	0	0	168	205	1	38	2e-13	73.7	37
NC_000911.1:3326434-3326638	SeqGr75176_1	1	100	38	0	0	168	205	1	38	2e-13	73.7	37
NC_000911.1:3326434-3326638	SeqGr47067_1	1	100	38	0	0	142	179	1	38	2e-13	73.7	37
NC_000911.1:3326434-3326638	SeqGr20420_1	1	100	38	0	0	123	160	13	50	2e-13	73.7	37
NC_000911.1:3326434-3326638	SeqGr18912_1	1	100	38	0	0	124	161	13	50	2e-13	73.7	37
NC_000911.1:3326434-3326638	SeqGr5908_1	1	100	38	0	0	168	205	1	38	2e-13	73.7	37
NC_000911.1:3326434-3326638	SeqGr358491_1	1	100	39	0	0	112	150	1	39	5e-14	75.7	38
NC_000911.1:3326434-3326638	SeqGr281443_1	1	100	39	0	0	141	179	1	39	5e-14	75.7	38
NC_000911.1:3326434-3326638	SeqGr265353_1	1	100	39	0	0	167	205	1	39	5e-14	75.7	38
NC_000911.1:3326434-3326638	SeqGr237678_1	1	100	39	0	0	141	179	6	44	5e-14	75.7	38
NC_000911.1:3326434-3326638	SeqGr232545_1	1	100	39	0	0	149	187	12	50	5e-14	75.7	38
NC_000911.1:3326434-3326638	SeqGr216388_1	1	100	39	0	0	141	179	1	39	5e-14	75.7	38
NC_000911.1:3326434-3326638	SeqGr149984_1	1	100	39	0	0	141	179	12	50	5e-14	75.7	38
NC_000911.1:3326434-3326638	SeqGr57851_1	1	100	39	0	0	167	205	1	39	5e-14	75.7	38
NC_000911.1:3326434-3326638	SeqGr24513_1	1	100	39	0	0	136	174	2	40	5e-14	75.7	38
NC_000911.1:3326434-3326638	SeqGr430337_1	1	97.44	39	1	0	124	162	12	50	3e-12	69.9	38
NC_000911.1:3326434-3326638	SeqGr398097_1	1	100	40	0	0	166	205	1	40	1e-14	77.6	39
NC_000911.1:3326434-3326638	SeqGr385100_1	1	100	40	0	0	157	196	1	40	1e-14	77.6	39
NC_000911.1:3326434-3326638	SeqGr349458_1	1	100	40	0	0	166	205	1	40	1e-14	77.6	39
NC_000911.1:3326434-3326638	SeqGr329942_1	1	100	40	0	0	166	205	1	40	1e-14	77.6	39
NC_000911.1:3326434-3326638	SeqGr294434_1	1	100	40	0	0	140	179	1	40	1e-14	77.6	39
NC_000911.1:3326434-3326638	SeqGr287215_1	1	100	40	0	0	166	205	1	40	1e-14	77.6	39
NC_000911.1:3326434-3326638	SeqGr253974_1	1	100	40	0	0	142	181	1	40	1e-14	77.6	39
NC_000911.1:3326434-3326638	SeqGr80764_1	1	100	40	0	0	166	205	1	40	1e-14	77.6	39
NC_000911.1:3326434-3326638	SeqGr27626_1	1	100	40	0	0	166	205	1	40	1e-14	77.6	39
NC_000911.1:3326434-3326638	SeqGr151151_1	1	97.5	40	1	0	126	165	8	47	7e-13	71.8	39
NC_000911.1:3326434-3326638	SeqGr229069_1	1	100	41	0	0	1	41	10	50	3e-15	79.5	40
NC_000911.1:3326434-3326638	SeqGr207050_1	1	100	41	0	0	141	181	7	47	3e-15	79.5	40
NC_000911.1:3326434-3326638	SeqGr6944_1	1	100	41	0	0	165	205	1	41	3e-15	79.5	40
NC_000911.1:3326434-3326638	SeqGr401512_1	1	100	42	0	0	119	160	9	50	9e-16	81.4	41
NC_000911.1:3326434-3326638	SeqGr373027_1	1	100	42	0	0	124	165	5	46	9e-16	81.4	41
NC_000911.1:3326434-3326638	SeqGr349355_1	1	100	42	0	0	164	205	8	49	9e-16	81.4	41
NC_000911.1:3326434-3326638	SeqGr316567_1	1	100	42	0	0	145	186	9	50	9e-16	81.4	41
NC_000911.1:3326434-3326638	SeqGr153516_1	1	100	42	0	0	164	205	1	42	9e-16	81.4	41
NC_000911.1:3326434-3326638	SeqGr115624_1	1	100	42	0	0	119	160	1	42	9e-16	81.4	41
NC_000911.1:3326434-3326638	SeqGr467417_1	1	100	43	0	0	1	43	4	46	2e-16	83.4	42
NC_000911.1:3326434-3326638	SeqGr428206_1	1	100	43	0	0	1	43	5	47	2e-16	83.4	42
NC_000911.1:3326434-3326638	SeqGr260339_1	1	100	43	0	0	1	43	5	47	2e-16	83.4	42
NC_000911.1:3326434-3326638	SeqGr230868_1	1	100	43	0	0	141	183	8	50	2e-16	83.4	42
NC_000911.1:3326434-3326638	SeqGr205063_1	1	100	43	0	0	145	187	8	50	2e-16	83.4	42
NC_000911.1:3326434-3326638	SeqGr90851_1	1	100	43	0	0	163	205	1	43	2e-16	83.4	42
NC_000911.1:3326434-3326638	SeqGr391224_1	1	100	44	0	0	136	179	1	44	6e-17	85.3	43
NC_000911.1:3326434-3326638	SeqGr375018_1	1	100	44	0	0	136	179	1	44	6e-17	85.3	43
NC_000911.1:3326434-3326638	SeqGr351219_1	1	100	44	0	0	136	179	1	44	6e-17	85.3	43
NC_000911.1:3326434-3326638	SeqGr335215_1	1	100	44	0	0	136	179	1	44	6e-17	85.3	43
NC_000911.1:3326434-3326638	SeqGr312584_1	1	100	44	0	0	162	205	2	45	6e-17	85.3	43
NC_000911.1:3326434-3326638	SeqGr307512_1	1	100	44	0	0	136	179	1	44	6e-17	85.3	43
NC_000911.1:3326434-3326638	SeqGr306740_1	1	100	44	0	0	136	179	1	44	6e-17	85.3	43
NC_000911.1:3326434-3326638	SeqGr299951_1	1	100	44	0	0	137	180	1	44	6e-17	85.3	43
NC_000911.1:3326434-3326638	SeqGr287958_1	1	100	44	0	0	137	180	1	44	6e-17	85.3	43
NC_000911.1:3326434-3326638	SeqGr101521_1	1	100	44	0	0	123	166	7	50	6e-17	85.3	43
NC_000911.1:3326434-3326638	SeqGr259491_1	1	100	45	0	0	161	205	3	47	2e-17	87.2	44
NC_000911.1:3326434-3326638	SeqGr254885_1	1	100	45	0	0	1	45	6	50	2e-17	87.2	44
NC_000911.1:3326434-3326638	SeqGr245927_1	1	100	45	0	0	121	165	2	46	2e-17	87.2	44
NC_000911.1:3326434-3326638	SeqGr159659_1	1	100	45	0	0	130	174	6	50	2e-17	87.2	44
NC_000911.1:3326434-3326638	SeqGr89034_1	1	100	45	0	0	155	199	6	50	2e-17	87.2	44
NC_000911.1:3326434-3326638	SeqGr33634_1	1	100	45	0	0	123	167	6	50	2e-17	87.2	44
NC_000911.1:3326434-3326638	SeqGr405422_1	1	100	46	0	0	117	162	5	50	4e-18	89.1	45
NC_000911.1:3326434-3326638	SeqGr381514_1	1	100	46	0	0	136	181	2	47	4e-18	89.1	45
NC_000911.1:3326434-3326638	SeqGr342380_1	1	100	46	0	0	136	181	1	46	4e-18	89.1	45
NC_000911.1:3326434-3326638	SeqGr323971_1	1	100	46	0	0	119	164	1	46	4e-18	89.1	45
NC_000911.1:3326434-3326638	SeqGr273391_1	1	100	46	0	0	11	56	1	46	4e-18	89.1	45
NC_000911.1:3326434-3326638	SeqGr240693_1	1	100	46	0	0	112	157	1	46	4e-18	89.1	45
NC_000911.1:3326434-3326638	SeqGr72292_1	1	100	46	0	0	160	205	1	46	4e-18	89.1	45
NC_000911.1:3326434-3326638	SeqGr372146_1	1	97.83	46	1	0	106	151	5	50	2e-16	83.4	45
NC_000911.1:3326434-3326638	SeqGr260007_1	1	100	47	0	0	119	165	1	47	1e-18	91.1	46
NC_000911.1:3326434-3326638	SeqGr58378_1	1	100	47	0	0	135	181	1	47	1e-18	91.1	46
NC_000911.1:3326434-3326638	SeqGr54154_1	1	100	47	0	0	159	205	1	47	1e-18	91.1	46
NC_000911.1:3326434-3326638	SeqGr10426_1	1	100	47	0	0	119	165	1	47	1e-18	91.1	46
NC_000911.1:3326434-3326638	SeqGr441446_1	1	97.87	47	1	0	119	165	1	47	6e-17	85.3	46
NC_000911.1:3326434-3326638	SeqGr73685_1	1	97.87	47	1	0	119	165	1	47	6e-17	85.3	46
NC_000911.1:3326434-3326638	SeqGr445897_1	1	100	48	0	0	126	173	1	48	3e-19	93	47
NC_000911.1:3326434-3326638	SeqGr380814_1	1	100	48	0	0	1	48	3	50	3e-19	93	47
NC_000911.1:3326434-3326638	SeqGr251592_1	1	100	48	0	0	136	183	3	50	3e-19	93	47
NC_000911.1:3326434-3326638	SeqGr236495_1	1	100	48	0	0	127	174	3	50	3e-19	93	47
NC_000911.1:3326434-3326638	SeqGr5286_1	1	100	48	0	0	158	205	1	48	3e-19	93	47
NC_000911.1:3326434-3326638	SeqGr443821_1	1	100	49	0	0	127	175	2	50	8e-20	94.9	48
NC_000911.1:3326434-3326638	SeqGr309019_1	1	100	49	0	0	1	49	2	50	8e-20	94.9	48
NC_000911.1:3326434-3326638	SeqGr228669_1	1	100	49	0	0	69	117	1	49	8e-20	94.9	48
NC_000911.1:3326434-3326638	SeqGr171392_1	1	100	49	0	0	156	204	2	50	8e-20	94.9	48
NC_000911.1:3326434-3326638	SeqGr81039_1	1	100	49	0	0	123	171	2	50	8e-20	94.9	48
NC_000911.1:3326434-3326638	SeqGr45078_1	1	100	49	0	0	119	167	2	50	8e-20	94.9	48
NC_000911.1:3326434-3326638	SeqGr21320_1	1	100	49	0	0	157	205	1	49	8e-20	94.9	48
NC_000911.1:3326434-3326638	SeqGr466574_1	1	100	50	0	0	143	192	1	50	2e-20	96.8	49
NC_000911.1:3326434-3326638	SeqGr431133_1	1	100	50	0	0	56	105	1	50	2e-20	96.8	49
NC_000911.1:3326434-3326638	SeqGr406638_1	1	100	50	0	0	155	204	1	50	2e-20	96.8	49
NC_000911.1:3326434-3326638	SeqGr399428_1	1	100	50	0	0	96	145	1	50	2e-20	96.8	49
NC_000911.1:3326434-3326638	SeqGr396231_1	1	100	50	0	0	117	166	1	50	2e-20	96.8	49
NC_000911.1:3326434-3326638	SeqGr391015_1	1	100	50	0	0	70	119	1	50	2e-20	96.8	49
NC_000911.1:3326434-3326638	SeqGr337161_1	1	100	50	0	0	139	188	1	50	2e-20	96.8	49
NC_000911.1:3326434-3326638	SeqGr333263_1	1	100	50	0	0	128	177	1	50	2e-20	96.8	49
NC_000911.1:3326434-3326638	SeqGr306584_1	1	100	50	0	0	129	178	1	50	2e-20	96.8	49
NC_000911.1:3326434-3326638	SeqGr276122_1	1	100	50	0	0	153	202	1	50	2e-20	96.8	49
NC_000911.1:3326434-3326638	SeqGr258525_1	1	100	50	0	0	140	189	1	50	2e-20	96.8	49
NC_000911.1:3326434-3326638	SeqGr231033_1	1	100	50	0	0	125	174	1	50	2e-20	96.8	49
NC_000911.1:3326434-3326638	SeqGr184347_1	1	100	50	0	0	144	193	1	50	2e-20	96.8	49
NC_000911.1:3326434-3326638	SeqGr150813_1	1	100	50	0	0	122	171	1	50	2e-20	96.8	49
NC_000911.1:3326434-3326638	SeqGr129840_1	1	100	50	0	0	141	190	1	50	2e-20	96.8	49
NC_000911.1:3326434-3326638	SeqGr126710_1	1	100	50	0	0	121	170	1	50	2e-20	96.8	49
NC_000911.1:3326434-3326638	SeqGr121777_1	1	100	50	0	0	138	187	1	50	2e-20	96.8	49
NC_000911.1:3326434-3326638	SeqGr111393_1	1	100	50	0	0	133	182	1	50	2e-20	96.8	49
NC_000911.1:3326434-3326638	SeqGr95326_1	1	100	50	0	0	39	88	1	50	2e-20	96.8	49
NC_000911.1:3326434-3326638	SeqGr86698_1	1	100	50	0	0	124	173	1	50	2e-20	96.8	49
NC_000911.1:3326434-3326638	SeqGr85961_1	1	100	50	0	0	154	203	1	50	2e-20	96.8	49
NC_000911.1:3326434-3326638	SeqGr69044_1	1	100	50	0	0	113	162	1	50	2e-20	96.8	49
NC_000911.1:3326434-3326638	SeqGr67706_1	1	100	50	0	0	156	205	1	50	2e-20	96.8	49
NC_000911.1:3326434-3326638	SeqGr62174_1	1	100	50	0	0	111	160	1	50	2e-20	96.8	49
NC_000911.1:3326434-3326638	SeqGr37496_1	1	100	50	0	0	131	180	1	50	2e-20	96.8	49
NC_000911.1:3326434-3326638	SeqGr24386_1	1	100	50	0	0	69	118	1	50	2e-20	96.8	49
NC_000911.1:3326434-3326638	SeqGr23857_1	1	100	50	0	0	134	183	1	50	2e-20	96.8	49
NC_000911.1:3326434-3326638	SeqGr16501_1	1	100	50	0	0	126	175	1	50	2e-20	96.8	49
NC_000911.1:3326434-3326638	SeqGr16246_1	1	100	50	0	0	136	185	1	50	2e-20	96.8	49
NC_000911.1:3326434-3326638	SeqGr13514_1	1	100	50	0	0	137	186	1	50	2e-20	96.8	49
NC_000911.1:3326434-3326638	SeqGr1887_1	1	100	50	0	0	112	161	1	50	2e-20	96.8	49
NC_000911.1:3326434-3326638	SeqGr359538_1	1	98	50	1	0	136	185	1	50	1e-18	91.1	49
NC_000911.1:3326434-3326638	SeqGr343151_1	1	98	50	1	0	112	161	1	50	1e-18	91.1	49
NC_000911.1:3326434-3326638	SeqGr302525_1	1	98	50	1	0	122	171	1	50	1e-18	91.1	49
NC_000911.1:3326434-3326638	SeqGr299373_1	1	98	50	1	0	112	161	1	50	1e-18	91.1	49
NC_000911.1:3326434-3326638	SeqGr257103_1	1	98	50	1	0	126	175	1	50	1e-18	91.1	49
NC_000911.1:3326434-3326638	SeqGr245958_1	1	98	50	1	0	131	180	1	50	1e-18	91.1	49
NC_000911.1:3326434-3326638	SeqGr157431_1	1	98	50	1	0	126	175	1	50	1e-18	91.1	49
NC_000911.1:3326434-3326638	SeqGr147332_1	1	98	50	1	0	124	173	1	50	1e-18	91.1	49
NC_000911.1:3326434-3326638	SeqGr86514_1	1	98	50	1	0	126	175	1	50	1e-18	91.1	49
NC_000911.1:3326434-3326638	SeqGr118661_1	1	96	50	2	0	112	161	1	50	6e-17	85.3	49

## Sheet: Ssp288
Query	DbSeq	Count	%match	matchLen	NumMismatch	GO	q.start	q.end	dbSeqStart	dbSeqEnd	evalue	bitScore	forward	Site	Count of mapped 3' end	Query	DbSeq	Count	%match	matchLen	NumMismatch	GO	q.start	q.end	dbSeqStart	dbSeqEnd	evalue	bitScore	forward	Site	Count of mapped 3' end
NC_000911.1:3326434-3326638	SeqGr321954_1	1	100	25	0	0	155	179	1	25	7e-06	48.8	24	1	0	NC_000911.1:3326434-3326638	SeqGr298951_1	1	94	50	3	0	51	100	50	1	4e-15	79.5	-49	1	0
NC_000911.1:3326434-3326638	SeqGr312556_1	1	100	25	0	0	112	136	1	25	7e-06	48.8	24	2	0	NC_000911.1:3326434-3326638	SeqGr279744_1	1	93.88	49	3	0	60	108	50	2	1e-14	77.6	-48	2	0
NC_000911.1:3326434-3326638	SeqGr276592_1	1	100	25	0	0	119	143	26	50	7e-06	48.8	24	3	0	NC_000911.1:3326434-3326638	SeqGr92869_1	1	85.11	47	7	0	60	106	50	4	2e-06	50.7	-46	3	0
NC_000911.1:3326434-3326638	SeqGr275074_1	1	100	25	0	0	177	201	26	50	7e-06	48.8	24	4	0	NC_000911.1:3326434-3326638	SeqGr127092_1	1	84.78	46	7	0	61	106	50	5	7e-06	48.8	-45	4	0
NC_000911.1:3326434-3326638	SeqGr252472_1	1	100	25	0	0	181	205	2	26	7e-06	48.8	24	5	0	NC_000911.1:3326434-3326638	SeqGr451690_1	1	94.29	35	2	0	69	103	35	1	3e-08	56.4	-34	5	0
NC_000911.1:3326434-3326638	SeqGr228692_1	1	100	25	0	0	149	173	22	46	7e-06	48.8	24	6	0	NC_000911.1:3326434-3326638	SeqGr282701_1	1	94.12	34	2	0	75	108	40	7	1e-07	54.5	-33	6	0
NC_000911.1:3326434-3326638	SeqGr213849_1	1	100	25	0	0	119	143	9	33	7e-06	48.8	24	7	0	NC_000911.1:3326434-3326638	SeqGr491690_1	1	96.97	33	1	0	47	79	43	11	8e-09	58.4	-32	7	0
NC_000911.1:3326434-3326638	SeqGr506344_1	1	100	26	0	0	180	205	1	26	2e-06	50.7	25	8	0	NC_000911.1:3326434-3326638	SeqGr10593_1	1	96.88	32	1	0	47	78	32	1	3e-08	56.4	-31	8	0
NC_000911.1:3326434-3326638	SeqGr431690_1	1	100	26	0	0	180	205	1	26	2e-06	50.7	25	9	0	NC_000911.1:3326434-3326638	SeqGr467598_1	1	96.77	31	1	0	47	77	33	3	1e-07	54.5	-30	9	0
NC_000911.1:3326434-3326638	SeqGr361110_1	1	100	26	0	0	180	205	1	26	2e-06	50.7	25	10	0	NC_000911.1:3326434-3326638	SeqGr367434_1	1	96.77	31	1	0	49	79	41	11	1e-07	54.5	-30	10	0
NC_000911.1:3326434-3326638	SeqGr351469_1	1	100	26	0	0	112	137	1	26	2e-06	50.7	25	11	0	NC_000911.1:3326434-3326638	SeqGr203169_1	1	100	28	0	0	52	79	50	23	1e-07	54.5	-27	11	0
NC_000911.1:3326434-3326638	SeqGr316095_1	1	100	26	0	0	180	205	1	26	2e-06	50.7	25	12	0	NC_000911.1:3326434-3326638	SeqGr532054_1	1	100	27	0	0	47	73	29	3	5e-07	52.6	-26	12	0
NC_000911.1:3326434-3326638	SeqGr315598_1	1	100	26	0	0	180	205	1	26	2e-06	50.7	25	13	0	NC_000911.1:3326434-3326638	SeqGr119550_1	1	100	27	0	0	47	73	30	4	5e-07	52.6	-26	13	0
NC_000911.1:3326434-3326638	SeqGr261340_1	1	100	26	0	0	180	205	1	26	2e-06	50.7	25	14	0															14	0
NC_000911.1:3326434-3326638	SeqGr239132_1	1	100	26	0	0	125	150	25	50	2e-06	50.7	25	15	0															15	0
NC_000911.1:3326434-3326638	SeqGr238464_1	1	100	26	0	0	180	205	1	26	2e-06	50.7	25	16	0															16	0
NC_000911.1:3326434-3326638	SeqGr106728_1	1	100	26	0	0	180	205	1	26	2e-06	50.7	25	17	0															17	0
NC_000911.1:3326434-3326638	SeqGr77262_1	1	100	26	0	0	119	144	25	50	2e-06	50.7	25	18	0															18	0
NC_000911.1:3326434-3326638	SeqGr53687_1	1	100	26	0	0	180	205	1	26	2e-06	50.7	25	19	0															19	0
NC_000911.1:3326434-3326638	SeqGr45439_1	1	100	26	0	0	177	202	1	26	2e-06	50.7	25	20	0															20	0
NC_000911.1:3326434-3326638	SeqGr10244_1	1	100	26	0	0	180	205	1	26	2e-06	50.7	25	21	0															21	0
NC_000911.1:3326434-3326638	SeqGr3700_1	1	100	26	0	0	180	205	1	26	2e-06	50.7	25	22	0															22	0
NC_000911.1:3326434-3326638	SeqGr1336_1	1	100	26	0	0	112	137	1	26	2e-06	50.7	25	23	0															23	0
NC_000911.1:3326434-3326638	SeqGr509608_1	1	100	27	0	0	136	162	24	50	5e-07	52.6	26	24	0															24	0
NC_000911.1:3326434-3326638	SeqGr477377_1	1	100	27	0	0	142	168	1	27	5e-07	52.6	26	25	0															25	0
NC_000911.1:3326434-3326638	SeqGr388852_1	1	100	27	0	0	126	152	24	50	5e-07	52.6	26	26	0															26	0
NC_000911.1:3326434-3326638	SeqGr359451_1	1	100	27	0	0	179	205	1	27	5e-07	52.6	26	27	0															27	0
NC_000911.1:3326434-3326638	SeqGr258994_1	1	100	27	0	0	2	28	1	27	5e-07	52.6	26	28	1															28	0
NC_000911.1:3326434-3326638	SeqGr218929_1	1	100	27	0	0	141	167	24	50	5e-07	52.6	26	29	0															29	0
NC_000911.1:3326434-3326638	SeqGr196159_1	1	100	27	0	0	171	197	24	50	5e-07	52.6	26	30	0															30	0
NC_000911.1:3326434-3326638	SeqGr135659_1	1	100	27	0	0	141	167	1	27	5e-07	52.6	26	31	1															31	0
NC_000911.1:3326434-3326638	SeqGr101048_1	1	100	27	0	0	117	143	24	50	5e-07	52.6	26	32	1															32	0
NC_000911.1:3326434-3326638	SeqGr92320_1	1	100	27	0	0	112	138	1	27	5e-07	52.6	26	33	1															33	0
NC_000911.1:3326434-3326638	SeqGr82737_1	1	100	27	0	0	141	167	24	50	5e-07	52.6	26	34	0															34	0
NC_000911.1:3326434-3326638	SeqGr26734_1	1	100	27	0	0	126	152	24	50	5e-07	52.6	26	35	0															35	0
NC_000911.1:3326434-3326638	SeqGr347593_1	1	100	28	0	0	178	205	1	28	1e-07	54.5	27	36	0															36	0
NC_000911.1:3326434-3326638	SeqGr279400_1	1	100	28	0	0	141	168	12	39	1e-07	54.5	27	37	0															37	0
NC_000911.1:3326434-3326638	SeqGr265322_1	1	100	28	0	0	21	48	1	28	1e-07	54.5	27	38	0															38	0
NC_000911.1:3326434-3326638	SeqGr182571_1	1	100	28	0	0	119	146	20	47	1e-07	54.5	27	39	0															39	0
NC_000911.1:3326434-3326638	SeqGr533034_1	1	100	29	0	0	119	147	22	50	3e-08	56.4	28	40	0															40	0
NC_000911.1:3326434-3326638	SeqGr522621_1	1	100	29	0	0	118	146	19	47	3e-08	56.4	28	41	0															41	0
NC_000911.1:3326434-3326638	SeqGr487314_1	1	100	29	0	0	177	205	1	29	3e-08	56.4	28	42	0															42	0
NC_000911.1:3326434-3326638	SeqGr452847_1	1	100	29	0	0	177	205	1	29	3e-08	56.4	28	43	0															43	0
NC_000911.1:3326434-3326638	SeqGr405029_1	1	100	29	0	0	119	147	22	50	3e-08	56.4	28	44	0															44	0
NC_000911.1:3326434-3326638	SeqGr380187_1	1	100	29	0	0	177	205	1	29	3e-08	56.4	28	45	1															45	0
NC_000911.1:3326434-3326638	SeqGr290422_1	1	100	29	0	0	177	205	1	29	3e-08	56.4	28	46	0															46	0
NC_000911.1:3326434-3326638	SeqGr282273_1	1	100	29	0	0	177	205	1	29	3e-08	56.4	28	47	0															47	0
NC_000911.1:3326434-3326638	SeqGr244708_1	1	100	29	0	0	177	205	1	29	3e-08	56.4	28	48	1															48	0
NC_000911.1:3326434-3326638	SeqGr185604_1	1	100	29	0	0	177	205	1	29	3e-08	56.4	28	49	0															49	0
NC_000911.1:3326434-3326638	SeqGr184314_1	1	100	29	0	0	119	147	22	50	3e-08	56.4	28	50	2															50	0
NC_000911.1:3326434-3326638	SeqGr145261_1	1	100	29	0	0	22	50	1	29	3e-08	56.4	28	51	0															51	0
NC_000911.1:3326434-3326638	SeqGr107454_1	1	100	29	0	0	177	205	1	29	3e-08	56.4	28	52	0															52	0
NC_000911.1:3326434-3326638	SeqGr77574_1	1	100	29	0	0	177	205	1	29	3e-08	56.4	28	53	0															53	0
NC_000911.1:3326434-3326638	SeqGr70725_1	1	100	29	0	0	177	205	1	29	3e-08	56.4	28	54	1															54	0
NC_000911.1:3326434-3326638	SeqGr55406_1	1	100	29	0	0	177	205	1	29	3e-08	56.4	28	55	1															55	0
NC_000911.1:3326434-3326638	SeqGr23803_1	1	100	29	0	0	177	205	1	29	3e-08	56.4	28	56	0															56	0
NC_000911.1:3326434-3326638	SeqGr359787_1	1	96.55	29	1	0	122	150	22	50	2e-06	50.7	28	57	0															57	0
NC_000911.1:3326434-3326638	SeqGr333648_1	1	96.55	29	1	0	177	205	1	29	2e-06	50.7	28	58	0															58	0
NC_000911.1:3326434-3326638	SeqGr493235_1	1	100	30	0	0	171	200	21	50	8e-09	58.4	29	59	0															59	0
NC_000911.1:3326434-3326638	SeqGr350748_1	1	100	30	0	0	158	187	1	30	8e-09	58.4	29	60	0															60	0
NC_000911.1:3326434-3326638	SeqGr185475_1	1	100	30	0	0	176	205	1	30	8e-09	58.4	29	61	0															61	0
NC_000911.1:3326434-3326638	SeqGr95424_1	1	100	30	0	0	153	182	1	30	8e-09	58.4	29	62	0															62	0
NC_000911.1:3326434-3326638	SeqGr404370_1	1	100	31	0	0	127	157	20	50	2e-09	60.3	30	63	0															63	0
NC_000911.1:3326434-3326638	SeqGr254603_1	1	100	31	0	0	117	147	20	50	2e-09	60.3	30	64	0															64	0
NC_000911.1:3326434-3326638	SeqGr115159_1	1	100	31	0	0	1	31	20	50	2e-09	60.3	30	65	0															65	0
NC_000911.1:3326434-3326638	SeqGr523816_1	1	100	32	0	0	1	32	19	50	6e-10	62.2	31	66	0															66	0
NC_000911.1:3326434-3326638	SeqGr467951_1	1	100	32	0	0	23	54	1	32	6e-10	62.2	31	67	0															67	0
NC_000911.1:3326434-3326638	SeqGr343407_1	1	100	32	0	0	119	150	19	50	6e-10	62.2	31	68	0															68	0
NC_000911.1:3326434-3326638	SeqGr207238_1	1	100	32	0	0	171	202	19	50	6e-10	62.2	31	69	0															69	0
NC_000911.1:3326434-3326638	SeqGr102184_1	1	100	32	0	0	112	143	1	32	6e-10	62.2	31	70	0															70	0
NC_000911.1:3326434-3326638	SeqGr52641_1	1	100	32	0	0	174	205	1	32	6e-10	62.2	31	71	0															71	0
NC_000911.1:3326434-3326638	SeqGr434974_1	1	96.88	32	1	0	174	205	1	32	3e-08	56.4	31	72	0															72	0
NC_000911.1:3326434-3326638	SeqGr179832_1	1	96.88	32	1	0	136	167	1	32	3e-08	56.4	31	73	0															73	2
NC_000911.1:3326434-3326638	SeqGr495555_1	1	100	33	0	0	158	190	18	50	2e-10	64.1	32	74	0															74	0
NC_000911.1:3326434-3326638	SeqGr344427_1	1	100	33	0	0	171	203	18	50	2e-10	64.1	32	75	0															75	0
NC_000911.1:3326434-3326638	SeqGr263560_1	1	100	33	0	0	111	143	1	33	2e-10	64.1	32	76	0															76	0
NC_000911.1:3326434-3326638	SeqGr249219_1	1	100	33	0	0	123	155	13	45	2e-10	64.1	32	77	0															77	1
NC_000911.1:3326434-3326638	SeqGr202152_1	1	100	33	0	0	171	203	7	39	2e-10	64.1	32	78	0															78	1
NC_000911.1:3326434-3326638	SeqGr132790_1	1	100	33	0	0	1	33	18	50	2e-10	64.1	32	79	0															79	3
NC_000911.1:3326434-3326638	SeqGr110646_1	1	100	33	0	0	119	151	18	50	2e-10	64.1	32	80	0															80	0
NC_000911.1:3326434-3326638	SeqGr17126_1	1	100	33	0	0	133	165	18	50	2e-10	64.1	32	81	0															81	0
NC_000911.1:3326434-3326638	SeqGr1550_1	1	100	33	0	0	173	205	1	33	2e-10	64.1	32	82	0															82	0
NC_000911.1:3326434-3326638	SeqGr111421_1	1	96.97	33	1	0	123	155	6	38	8e-09	58.4	32	83	0															83	0
NC_000911.1:3326434-3326638	SeqGr515238_1	1	100	34	0	0	172	205	5	38	4e-11	66.1	33	84	0															84	0
NC_000911.1:3326434-3326638	SeqGr385431_1	1	100	34	0	0	126	159	17	50	4e-11	66.1	33	85	0															85	0
NC_000911.1:3326434-3326638	SeqGr375976_1	1	100	34	0	0	141	174	1	34	4e-11	66.1	33	86	0															86	0
NC_000911.1:3326434-3326638	SeqGr341381_1	1	100	34	0	0	112	145	1	34	4e-11	66.1	33	87	0															87	0
NC_000911.1:3326434-3326638	SeqGr203924_1	1	100	34	0	0	119	152	17	50	4e-11	66.1	33	88	0															88	0
NC_000911.1:3326434-3326638	SeqGr131976_1	1	100	34	0	0	118	151	6	39	4e-11	66.1	33	89	0															89	0
NC_000911.1:3326434-3326638	SeqGr4380_1	1	100	34	0	0	172	205	1	34	4e-11	66.1	33	90	0															90	0
NC_000911.1:3326434-3326638	SeqGr291009_1	1	100	35	0	0	165	199	16	50	1e-11	68	34	91	0															91	0
NC_000911.1:3326434-3326638	SeqGr163091_1	1	100	35	0	0	171	205	2	36	1e-11	68	34	92	0															92	0
NC_000911.1:3326434-3326638	SeqGr116662_1	1	100	35	0	0	171	205	7	41	1e-11	68	34	93	0															93	0
NC_000911.1:3326434-3326638	SeqGr110806_1	1	100	35	0	0	123	157	16	50	1e-11	68	34	94	0															94	0
NC_000911.1:3326434-3326638	SeqGr60727_1	1	100	35	0	0	171	205	6	40	1e-11	68	34	95	0															95	0
NC_000911.1:3326434-3326638	SeqGr19984_1	1	100	35	0	0	171	205	1	35	1e-11	68	34	96	0															96	0
NC_000911.1:3326434-3326638	SeqGr471401_1	1	100	36	0	0	170	205	1	36	3e-12	69.9	35	97	0															97	0
NC_000911.1:3326434-3326638	SeqGr416136_1	1	100	36	0	0	112	147	1	36	3e-12	69.9	35	98	0															98	0
NC_000911.1:3326434-3326638	SeqGr380884_1	1	100	36	0	0	168	203	1	36	3e-12	69.9	35	99	0															99	0
NC_000911.1:3326434-3326638	SeqGr380206_1	1	100	36	0	0	144	179	1	36	3e-12	69.9	35	100	0															100	1
NC_000911.1:3326434-3326638	SeqGr354689_1	1	100	36	0	0	119	154	15	50	3e-12	69.9	35	101	0															101	0
NC_000911.1:3326434-3326638	SeqGr397282_1	1	100	37	0	0	124	160	2	38	8e-13	71.8	36	102	0															102	0
NC_000911.1:3326434-3326638	SeqGr397061_1	1	100	37	0	0	169	205	1	37	8e-13	71.8	36	103	0															103	1
NC_000911.1:3326434-3326638	SeqGr364498_1	1	100	37	0	0	119	155	14	50	8e-13	71.8	36	104	0															104	0
NC_000911.1:3326434-3326638	SeqGr67911_1	1	100	37	0	0	111	147	1	37	8e-13	71.8	36	105	0															105	0
NC_000911.1:3326434-3326638	SeqGr481242_1	1	100	38	0	0	168	205	12	49	2e-13	73.7	37	106	0															106	2
NC_000911.1:3326434-3326638	SeqGr443792_1	1	100	38	0	0	168	205	1	38	2e-13	73.7	37	107	0															107	0
NC_000911.1:3326434-3326638	SeqGr294976_1	1	100	38	0	0	123	160	13	50	2e-13	73.7	37	108	0															108	2
NC_000911.1:3326434-3326638	SeqGr55606_1	1	100	38	0	0	168	205	1	38	2e-13	73.7	37	109	0															109	0
NC_000911.1:3326434-3326638	SeqGr48439_1	1	100	38	0	0	112	149	1	38	2e-13	73.7	37	110	0															110	0
NC_000911.1:3326434-3326638	SeqGr244521_1	1	100	39	0	0	124	162	12	50	5e-14	75.7	38	111	0															111	0
NC_000911.1:3326434-3326638	SeqGr14412_1	1	100	39	0	0	167	205	1	39	5e-14	75.7	38	112	0															112	0
NC_000911.1:3326434-3326638	SeqGr506775_1	1	100	40	0	0	119	158	11	50	1e-14	77.6	39	113	0															113	0
NC_000911.1:3326434-3326638	SeqGr250502_1	1	100	40	0	0	117	156	11	50	1e-14	77.6	39	114	0															114	0
NC_000911.1:3326434-3326638	SeqGr220885_1	1	100	40	0	0	166	205	1	40	1e-14	77.6	39	115	1															115	0
NC_000911.1:3326434-3326638	SeqGr70271_1	1	100	40	0	0	166	205	1	40	1e-14	77.6	39	116	0															116	0
NC_000911.1:3326434-3326638	SeqGr48533_1	1	100	40	0	0	142	181	1	40	1e-14	77.6	39	117	0															117	0
NC_000911.1:3326434-3326638	SeqGr26256_1	1	100	40	0	0	166	205	1	40	1e-14	77.6	39	118	1															118	0
NC_000911.1:3326434-3326638	SeqGr473112_1	1	100	41	0	0	124	164	10	50	4e-15	79.5	40	119	0															119	0
NC_000911.1:3326434-3326638	SeqGr334465_1	1	100	41	0	0	122	162	1	41	4e-15	79.5	40	120	0															120	0
NC_000911.1:3326434-3326638	SeqGr277244_1	1	100	41	0	0	140	180	1	41	4e-15	79.5	40	121	0															121	0
NC_000911.1:3326434-3326638	SeqGr52211_1	1	100	41	0	0	165	205	1	41	4e-15	79.5	40	122	0															122	0
NC_000911.1:3326434-3326638	SeqGr382443_1	1	100	42	0	0	119	160	9	50	1e-15	81.4	41	123	0															123	0
NC_000911.1:3326434-3326638	SeqGr88195_1	1	100	42	0	0	164	205	5	46	1e-15	81.4	41	124	0															124	0
NC_000911.1:3326434-3326638	SeqGr471027_1	1	100	43	0	0	163	205	1	43	3e-16	83.4	42	125	0															125	0
NC_000911.1:3326434-3326638	SeqGr358443_1	1	100	43	0	0	117	159	5	47	3e-16	83.4	42	126	0															126	0
NC_000911.1:3326434-3326638	SeqGr480353_1	1	100	44	0	0	123	166	7	50	7e-17	85.3	43	127	0															127	0
NC_000911.1:3326434-3326638	SeqGr399635_1	1	100	44	0	0	112	155	1	44	7e-17	85.3	43	128	0															128	0
NC_000911.1:3326434-3326638	SeqGr344561_1	1	100	44	0	0	137	180	1	44	7e-17	85.3	43	129	0															129	0
NC_000911.1:3326434-3326638	SeqGr77370_1	1	100	44	0	0	119	162	2	45	7e-17	85.3	43	130	0															130	0
NC_000911.1:3326434-3326638	SeqGr253068_1	1	100	45	0	0	123	167	6	50	2e-17	87.2	44	131	0															131	0
NC_000911.1:3326434-3326638	SeqGr17230_1	1	100	45	0	0	1	45	6	50	2e-17	87.2	44	132	0															132	0
NC_000911.1:3326434-3326638	SeqGr494868_1	1	100	46	0	0	136	181	2	47	5e-18	89.1	45	133	0															133	0
NC_000911.1:3326434-3326638	SeqGr415401_1	1	100	46	0	0	136	181	1	46	5e-18	89.1	45	134	0															134	0
NC_000911.1:3326434-3326638	SeqGr324098_1	1	95.65	46	2	0	142	187	5	50	1e-14	77.6	45	135	0															135	0
NC_000911.1:3326434-3326638	SeqGr400307_1	1	100	47	0	0	119	165	1	47	1e-18	91.1	46	136	1															136	0
NC_000911.1:3326434-3326638	SeqGr386328_1	1	100	47	0	0	159	205	1	47	1e-18	91.1	46	137	2															137	0
NC_000911.1:3326434-3326638	SeqGr78836_1	1	100	47	0	0	135	181	1	47	1e-18	91.1	46	138	1															138	0
NC_000911.1:3326434-3326638	SeqGr72405_1	1	100	47	0	0	119	165	1	47	1e-18	91.1	46	139	0															139	0
NC_000911.1:3326434-3326638	SeqGr188327_1	1	100	48	0	0	123	170	3	50	3e-19	93	47	140	0															140	0
NC_000911.1:3326434-3326638	SeqGr106418_1	1	100	48	0	0	158	205	1	48	3e-19	93	47	141	0															141	0
NC_000911.1:3326434-3326638	SeqGr109430_1	1	100	49	0	0	119	167	2	50	9e-20	94.9	48	142	0															142	0
NC_000911.1:3326434-3326638	SeqGr57789_1	1	100	49	0	0	157	205	1	49	9e-20	94.9	48	143	5															143	0
NC_000911.1:3326434-3326638	SeqGr540831_1	1	100	50	0	0	125	174	1	50	2e-20	96.8	49	144	1															144	0
NC_000911.1:3326434-3326638	SeqGr514242_1	1	100	50	0	0	128	177	1	50	2e-20	96.8	49	145	2															145	0
NC_000911.1:3326434-3326638	SeqGr505741_1	1	100	50	0	0	129	178	1	50	2e-20	96.8	49	146	3															146	0
NC_000911.1:3326434-3326638	SeqGr422497_1	1	100	50	0	0	155	204	1	50	2e-20	96.8	49	147	7															147	0
NC_000911.1:3326434-3326638	SeqGr415920_1	1	100	50	0	0	113	162	1	50	2e-20	96.8	49	148	0															148	0
NC_000911.1:3326434-3326638	SeqGr394456_1	1	100	50	0	0	96	145	1	50	2e-20	96.8	49	149	1															149	0
NC_000911.1:3326434-3326638	SeqGr375570_1	1	100	50	0	0	146	195	1	50	2e-20	96.8	49	150	3															150	0
NC_000911.1:3326434-3326638	SeqGr359068_1	1	100	50	0	0	97	146	1	50	2e-20	96.8	49	151	2															151	0
NC_000911.1:3326434-3326638	SeqGr343744_1	1	100	50	0	0	1	50	1	50	2e-20	96.8	49	152	3															152	0
NC_000911.1:3326434-3326638	SeqGr326354_1	1	100	50	0	0	143	192	1	50	2e-20	96.8	49	153	0															153	0
NC_000911.1:3326434-3326638	SeqGr324343_1	1	100	50	0	0	156	205	1	50	2e-20	96.8	49	154	1															154	0
NC_000911.1:3326434-3326638	SeqGr307682_1	1	100	50	0	0	98	147	1	50	2e-20	96.8	49	155	4															155	0
NC_000911.1:3326434-3326638	SeqGr297546_1	1	100	50	0	0	121	170	1	50	2e-20	96.8	49	156	1															156	0
NC_000911.1:3326434-3326638	SeqGr240095_1	1	100	50	0	0	6	55	1	50	2e-20	96.8	49	157	2															157	0
NC_000911.1:3326434-3326638	SeqGr223339_1	1	100	50	0	0	69	118	1	50	2e-20	96.8	49	158	1															158	0
NC_000911.1:3326434-3326638	SeqGr192037_1	1	100	50	0	0	137	186	1	50	2e-20	96.8	49	159	2															159	0
NC_000911.1:3326434-3326638	SeqGr181958_1	1	100	50	0	0	139	188	1	50	2e-20	96.8	49	160	3															160	0
NC_000911.1:3326434-3326638	SeqGr152180_1	1	100	50	0	0	141	190	1	50	2e-20	96.8	49	161	4															161	0
NC_000911.1:3326434-3326638	SeqGr131491_1	1	100	50	0	0	154	203	1	50	2e-20	96.8	49	162	5															162	0
NC_000911.1:3326434-3326638	SeqGr124011_1	1	100	50	0	0	122	171	1	50	2e-20	96.8	49	163	0															163	0
NC_000911.1:3326434-3326638	SeqGr89787_1	1	100	50	0	0	140	189	1	50	2e-20	96.8	49	164	1															164	0
NC_000911.1:3326434-3326638	SeqGr66940_1	1	100	50	0	0	126	175	1	50	2e-20	96.8	49	165	3															165	0
NC_000911.1:3326434-3326638	SeqGr63700_1	1	100	50	0	0	124	173	1	50	2e-20	96.8	49	166	2															166	0
NC_000911.1:3326434-3326638	SeqGr51682_1	1	100	50	0	0	66	115	1	50	2e-20	96.8	49	167	6															167	0
NC_000911.1:3326434-3326638	SeqGr41711_1	1	100	50	0	0	117	166	1	50	2e-20	96.8	49	168	2															168	0
NC_000911.1:3326434-3326638	SeqGr21178_1	1	100	50	0	0	136	185	1	50	2e-20	96.8	49	169	0															169	0
NC_000911.1:3326434-3326638	SeqGr13977_1	1	100	50	0	0	127	176	1	50	2e-20	96.8	49	170	2															170	0
NC_000911.1:3326434-3326638	SeqGr4151_1	1	100	50	0	0	112	161	1	50	2e-20	96.8	49	171	1															171	0
NC_000911.1:3326434-3326638	SeqGr347463_1	1	98	50	1	0	112	161	1	50	1e-18	91.1	49	172	0															172	0
NC_000911.1:3326434-3326638	SeqGr226593_1	1	98	50	1	0	112	161	1	50	1e-18	91.1	49	173	2															173	0
NC_000911.1:3326434-3326638	SeqGr96742_1	1	98	50	1	0	112	161	1	50	1e-18	91.1	49	174	2															174	0
														175	1															175	0
														176	1															176	0
														177	1															177	0
														178	1															178	0
														179	2															179	0
														180	2															180	0
														181	4															181	0
														182	1															182	0
														183	0															183	0
														184	0															184	0
														185	1															185	0
														186	1															186	0
														187	2															187	0
														188	1															188	0
														189	1															189	0
														190	2															190	0
														191	0															191	0
														192	1															192	0
														193	0															193	0
														194	0															194	0
														195	1															195	0
														196	0															196	0
														197	1															197	0
														198	0															198	0
														199	1															199	0
														200	1															200	0
														201	1															201	0
														202	2															202	0
														203	4															203	0
														204	1															204	0
														205	53															205	0
															0																0

## Sheet: Ssp_ALL
Site	Ssp287	Ssp285	Ssp286	Ssp288	sum count
1	0	0	0	0	0
2	0	0	0	0	0
3	0	0	0	0	0
4	0	0	0	0	0
5	0	0	0	0	0
6	0	0	0	0	0
7	0	0	0	0	0
8	0	0	0	0	0
9	0	0	0	0	0
10	0	0	0	0	0
11	0	0	0	0	0
12	0	0	0	0	0
13	0	0	0	0	0
14	0	0	0	0	0
15	0	0	0	0	0
16	0	0	0	0	0
17	0	0	0	0	0
18	0	0	0	0	0
19	0	0	0	0	0
20	0	0	0	0	0
21	0	0	0	0	0
22	0	0	0	0	0
23	0	0	0	0	0
24	0	0	0	0	0
25	0	0	0	0	0
26	0	0	0	0	0
27	0	0	0	0	0
28	0	0	0	0	0
29	0	0	0	0	0
30	0	0	0	0	0
31	0	0	0	0	0
32	0	0	0	0	0
33	0	0	0	0	0
34	0	0	0	0	0
35	0	0	0	0	0
36	0	0	0	0	0
37	0	0	0	0	0
38	0	0	0	0	0
39	0	0	0	0	0
40	0	0	0	0	0
41	0	0	0	0	0
42	0	0	0	0	0
43	0	0	0	0	0
44	0	0	0	0	0
45	0	0	0	0	0
46	0	0	0	0	0
47	0	0	0	0	0
48	0	0	0	0	0
49	0	0	0	0	0
50	0	0	0	0	0
51	0	0	0	0	0
52	0	0	0	0	0
53	0	0	0	0	0
54	0	0	0	0	0
55	0	0	0	0	0
56	0	0	0	0	0
57	0	0	0	0	0
58	0	0	0	0	0
59	0	0	0	0	0
60	0	0	0	0	0
61	0	0	0	0	0
62	0	0	0	0	0
63	0	0	0	0	0
64	0	0	0	0	0
65	0	0	0	0	0
66	0	0	0	0	0
67	0	0	0	0	0
68	0	0	0	0	0
69	0	0	0	0	0
70	0	0	0	0	0
71	0	0	0	0	0
72	0	0	0	0	0
73	0	3	4	2	9
74	0	0	0	0	0
75	0	0	0	0	0
76	0	0	0	0	0
77	0	0	0	1	1
78	0	1	1	1	3
79	6	6	7	3	22
80	0	0	0	0	0
81	0	0	0	0	0
82	0	0	0	0	0
83	0	0	0	0	0
84	0	1	0	0	1
85	0	0	0	0	0
86	0	0	0	0	0
87	0	0	0	0	0
88	0	0	0	0	0
89	1	4	2	0	7
90	0	0	0	0	0
91	0	0	0	0	0
92	0	0	0	0	0
93	0	0	0	0	0
94	1	0	0	0	1
95	0	0	0	0	0
96	0	0	0	0	0
97	0	0	0	0	0
98	0	1	0	0	1
99	0	0	0	0	0
100	2	2	5	1	10
101	0	0	0	0	0
102	0	0	0	0	0
103	0	1	3	1	5
104	0	0	0	0	0
105	0	0	1	0	1
106	1	2	2	2	7
107	0	0	0	0	0
108	5	7	8	2	22
109	0	0	0	0	0
110	0	0	0	0	0
111	0	0	0	0	0
112	0	0	0	0	0
113	0	0	0	0	0
114	0	0	0	0	0
115	0	0	0	0	0
116	0	0	0	0	0
117	0	0	0	0	0
118	0	0	0	0	0
119	0	0	0	0	0
120	0	0	0	0	0
121	0	0	0	0	0
122	0	0	0	0	0
123	0	0	0	0	0
124	0	0	0	0	0
125	0	0	0	0	0
126	0	0	0	0	0
127	0	0	0	0	0
128	0	0	0	0	0
129	0	0	0	0	0
130	0	0	0	0	0
131	0	0	0	0	0
132	0	0	0	0	0
133	0	0	0	0	0
134	0	0	0	0	0
135	0	0	0	0	0
136	0	0	0	0	0
137	0	0	0	0	0
138	0	0	0	0	0
139	0	0	0	0	0
140	0	0	0	0	0
141	0	0	0	0	0
142	0	0	0	0	0
143	0	0	0	0	0
144	0	0	0	0	0
145	0	0	0	0	0
146	0	0	0	0	0
147	0	0	0	0	0
148	0	0	0	0	0
149	0	0	0	0	0
150	0	0	0	0	0
151	0	0	0	0	0
152	0	0	0	0	0
153	0	0	0	0	0
154	0	0	0	0	0
155	0	0	0	0	0
156	0	0	0	0	0
157	0	0	0	0	0
158	0	0	0	0	0
159	0	0	0	0	0
160	0	0	0	0	0
161	0	0	0	0	0
162	0	0	0	0	0
163	0	0	0	0	0
164	0	0	0	0	0
165	0	0	0	0	0
166	0	0	0	0	0
167	0	0	0	0	0
168	0	0	0	0	0
169	0	0	0	0	0
170	0	0	0	0	0
171	0	0	0	0	0
172	0	0	0	0	0
173	0	0	0	0	0
174	0	0	0	0	0
175	0	0	0	0	0
176	0	0	0	0	0
177	0	0	0	0	0
178	0	0	0	0	0
179	0	0	0	0	0
180	0	0	0	0	0
181	0	0	0	0	0
182	0	0	0	0	0
183	0	0	0	0	0
184	0	0	0	0	0
185	0	0	0	0	0
186	0	0	0	0	0
187	0	0	0	0	0
188	0	0	0	0	0
189	0	0	0	0	0
190	0	0	0	0	0
191	0	0	0	0	0
192	0	0	0	0	0
193	0	0	0	0	0
194	0	0	0	0	0
195	0	0	0	0	0
196	0	0	0	0	0
197	0	0	0	0	0
198	0	0	0	0	0
199	0	0	0	0	0
200	0	0	0	0	0
201	0	0	0	0	0
202	0	0	0	0	0
203	0	0	0	0	0
204	0	0	0	0	0
205	0	0	0	0	0

## Sheet: Nmeningitidis108
Query	DbSeq	Count	%match	matchLen	NumMismatch	GO	q.start	q.end	dbSeqStart	dbSeqEnd	evalue	bitScore	forward	Site	Count of mapped 3' end
N.meningitidis_16S	SeqGr465201_1	1	100	101	0	0	34	134	1	101	1e-47	187	100	1	0
N.meningitidis_16S	SeqGr446900_1	1	100	101	0	0	32	132	1	101	1e-47	187	100	2	0
N.meningitidis_16S	SeqGr354887_1	1	100	101	0	0	38	138	1	101	1e-47	187	100	3	0
N.meningitidis_16S	SeqGr351806_1	1	100	101	0	0	35	135	1	101	1e-47	187	100	4	0
N.meningitidis_16S	SeqGr307620_1	1	100	101	0	0	31	131	1	101	1e-47	187	100	5	0
N.meningitidis_16S	SeqGr294247_1	1	100	101	0	0	28	128	1	101	1e-47	187	100	6	0
N.meningitidis_16S	SeqGr224682_1	1	100	101	0	0	26	126	1	101	1e-47	187	100	7	0
N.meningitidis_16S	SeqGr199860_1	1	100	101	0	0	30	130	1	101	1e-47	187	100	8	0
N.meningitidis_16S	SeqGr155704_1	1	100	101	0	0	37	137	1	101	1e-47	187	100	9	0
N.meningitidis_16S	SeqGr101342_1	1	100	101	0	0	41	141	1	101	1e-47	187	100	10	0
N.meningitidis_16S	SeqGr60606_1	1	100	101	0	0	29	129	1	101	1e-47	187	100	11	0
N.meningitidis_16S	SeqGr51864_1	1	100	101	0	0	33	133	1	101	1e-47	187	100	12	0
N.meningitidis_16S	SeqGr51168_1	1	100	101	0	0	39	139	1	101	1e-47	187	100	13	0
N.meningitidis_16S	SeqGr47650_1	1	100	101	0	0	54	154	1	101	1e-47	187	100	14	0
N.meningitidis_16S	SeqGr428962_1	1	100	100	0	0	25	124	2	101	5e-47	185	99	15	0
N.meningitidis_16S	SeqGr208448_1	1	100	100	0	0	41	140	1	100	5e-47	185	99	16	0
N.meningitidis_16S	SeqGr203240_1	1	100	100	0	0	38	137	1	100	5e-47	185	99	17	0
N.meningitidis_16S	SeqGr193521_1	1	100	100	0	0	44	143	1	100	5e-47	185	99	18	0
N.meningitidis_16S	SeqGr174510_1	1	100	100	0	0	41	140	1	100	5e-47	185	99	19	0
N.meningitidis_16S	SeqGr212723_1	1	100	99	0	0	25	123	3	101	2e-46	183	98	20	0
N.meningitidis_16S	SeqGr170482_1	1	100	99	0	0	42	140	1	99	2e-46	183	98	21	0
N.meningitidis_16S	SeqGr405163_1	1	99.01	101	1	0	28	128	1	101	6e-46	182	100	22	0
N.meningitidis_16S	SeqGr373827_1	1	99.02	102	0	1	67	168	1	101	6e-46	182	100	23	0
N.meningitidis_16S	SeqGr371212_1	1	100	98	0	0	44	141	1	98	6e-46	182	97	24	0
N.meningitidis_16S	SeqGr323569_1	1	100	98	0	0	41	138	1	98	6e-46	182	97	25	0
N.meningitidis_16S	SeqGr279285_1	1	99.02	102	0	1	66	167	1	101	6e-46	182	100	26	0
N.meningitidis_16S	SeqGr264035_1	1	100	98	0	0	39	136	1	98	6e-46	182	97	27	0
N.meningitidis_16S	SeqGr260448_1	1	100	98	0	0	41	138	1	98	6e-46	182	97	28	0
N.meningitidis_16S	SeqGr251893_1	1	100	98	0	0	37	134	4	101	6e-46	182	97	29	0
N.meningitidis_16S	SeqGr211500_1	1	100	98	0	0	43	140	1	98	6e-46	182	97	30	0
N.meningitidis_16S	SeqGr202206_1	1	100	98	0	0	45	142	1	98	6e-46	182	97	31	0
N.meningitidis_16S	SeqGr201407_1	1	100	98	0	0	44	141	1	98	6e-46	182	97	32	0
N.meningitidis_16S	SeqGr177097_1	1	99.01	101	1	0	34	134	1	101	6e-46	182	100	33	0
N.meningitidis_16S	SeqGr163156_1	1	99.01	101	1	0	21	121	1	101	6e-46	182	100	34	0
N.meningitidis_16S	SeqGr127108_1	1	100	98	0	0	25	122	4	101	6e-46	182	97	35	0
N.meningitidis_16S	SeqGr62590_1	1	99.01	101	1	0	19	119	1	101	6e-46	182	100	36	25
N.meningitidis_16S	SeqGr47974_1	1	100	98	0	0	42	139	1	98	6e-46	182	97	37	47
N.meningitidis_16S	SeqGr40286_1	1	99.02	102	0	1	65	166	1	101	6e-46	182	100	38	77
N.meningitidis_16S	SeqGr482375_1	1	100	97	0	0	45	141	1	97	2e-45	180	96	39	28
N.meningitidis_16S	SeqGr415484_1	1	99	100	1	0	42	141	1	100	2e-45	180	99	40	58
N.meningitidis_16S	SeqGr204773_1	1	99	100	1	0	17	116	2	101	2e-45	180	99	41	21
N.meningitidis_16S	SeqGr202474_1	1	99	100	1	0	17	116	2	101	2e-45	180	99	42	34
N.meningitidis_16S	SeqGr176863_1	1	100	97	0	0	42	138	1	97	2e-45	180	96	43	41
N.meningitidis_16S	SeqGr141091_1	1	100	97	0	0	44	140	1	97	2e-45	180	96	44	33
N.meningitidis_16S	SeqGr467489_1	1	100	96	0	0	44	139	1	96	8e-45	178	95	45	51
N.meningitidis_16S	SeqGr185460_1	1	98.99	99	1	0	17	115	3	101	8e-45	178	98	46	22
N.meningitidis_16S	SeqGr166828_1	1	100	96	0	0	47	142	1	96	8e-45	178	95	47	17
N.meningitidis_16S	SeqGr147461_1	1	100	96	0	0	45	140	1	96	8e-45	178	95	48	20
N.meningitidis_16S	SeqGr109200_1	1	100	96	0	0	46	141	1	96	8e-45	178	95	49	3
N.meningitidis_16S	SeqGr47044_1	1	99	100	0	1	106	205	1	99	8e-45	178	98	50	4
N.meningitidis_16S	SeqGr39312_1	1	100	96	0	0	59	154	1	96	8e-45	178	95	51	5
N.meningitidis_16S	SeqGr404380_1	1	98.02	101	2	0	34	134	1	101	3e-44	176	100	52	4
N.meningitidis_16S	SeqGr389724_1	1	100	95	0	0	44	138	1	95	3e-44	176	94	53	3
N.meningitidis_16S	SeqGr344295_1	1	100	95	0	0	46	140	1	95	3e-44	176	94	54	10
N.meningitidis_16S	SeqGr318023_1	1	98.98	98	1	0	17	114	1	98	3e-44	176	97	55	11
N.meningitidis_16S	SeqGr256195_1	1	98.02	101	2	0	12	112	1	101	3e-44	176	100	56	21
N.meningitidis_16S	SeqGr254113_1	1	98.98	98	1	0	17	114	4	101	3e-44	176	97	57	17
N.meningitidis_16S	SeqGr208743_1	1	98.02	101	2	0	11	111	1	101	3e-44	176	100	58	13
N.meningitidis_16S	SeqGr181401_1	1	98.04	102	1	1	66	167	1	101	3e-44	176	100	59	3
N.meningitidis_16S	SeqGr60397_1	1	98.98	98	1	0	25	122	4	101	3e-44	176	97	60	18
N.meningitidis_16S	SeqGr24439_1	1	98.04	102	1	1	66	167	1	101	3e-44	176	100	61	7
N.meningitidis_16S	SeqGr18991_1	1	98.98	98	1	0	25	122	4	101	3e-44	176	97	62	7
N.meningitidis_16S	SeqGr517410_1	1	98.97	97	1	0	44	140	1	97	1e-43	174	96	63	7
N.meningitidis_16S	SeqGr469263_1	1	98.98	98	0	1	67	164	1	97	1e-43	174	96	64	3
N.meningitidis_16S	SeqGr305390_1	1	98.97	97	1	0	45	141	1	97	1e-43	174	96	65	8
N.meningitidis_16S	SeqGr153892_1	1	100	94	0	0	48	141	1	94	1e-43	174	93	66	3
N.meningitidis_16S	SeqGr79839_1	1	98	100	2	0	11	110	2	101	1e-43	174	99	67	0
N.meningitidis_16S	SeqGr330880_1	1	100	93	0	0	46	138	1	93	4e-43	172	92	68	1
N.meningitidis_16S	SeqGr314541_1	1	98.96	96	1	0	45	140	1	96	4e-43	172	95	69	2
N.meningitidis_16S	SeqGr299643_1	1	97.98	99	2	0	17	115	3	101	4e-43	172	98	70	1
N.meningitidis_16S	SeqGr162461_1	1	100	93	0	0	66	158	1	93	4e-43	172	92	71	1
N.meningitidis_16S	SeqGr151337_1	1	100	93	0	0	49	141	1	93	4e-43	172	92	72	1
N.meningitidis_16S	SeqGr149937_1	1	100	93	0	0	46	138	1	93	4e-43	172	92	73	1
N.meningitidis_16S	SeqGr467478_1	1	100	92	0	0	47	138	1	92	1e-42	171	91	74	1
N.meningitidis_16S	SeqGr378675_1	1	100	92	0	0	50	141	1	92	1e-42	171	91	75	3
N.meningitidis_16S	SeqGr360710_1	1	98.95	95	1	0	44	138	1	95	1e-42	171	94	76	1
N.meningitidis_16S	SeqGr354385_1	1	97.03	101	3	0	3	103	1	101	1e-42	171	100	77	1
N.meningitidis_16S	SeqGr307027_1	1	100	92	0	0	50	141	1	92	1e-42	171	91	78	2
N.meningitidis_16S	SeqGr243287_1	1	97.03	101	3	0	6	106	1	101	1e-42	171	100	79	4
N.meningitidis_16S	SeqGr210293_1	1	97.06	102	2	1	66	167	1	101	1e-42	171	100	80	2
N.meningitidis_16S	SeqGr189851_1	1	97.03	101	3	0	4	104	1	101	1e-42	171	100	81	0
N.meningitidis_16S	SeqGr511609_1	1	97	100	3	0	1	100	2	101	5e-42	169	99	82	1
N.meningitidis_16S	SeqGr330515_1	1	97	100	3	0	6	105	2	101	5e-42	169	99	83	3
N.meningitidis_16S	SeqGr157926_1	1	98.94	94	1	0	46	139	1	94	5e-42	169	93	84	0
N.meningitidis_16S	SeqGr213070_1	1	100	90	0	0	51	140	1	90	2e-41	167	89	85	0
N.meningitidis_16S	SeqGr213034_1	1	96.97	99	3	0	2	100	3	101	2e-41	167	98	86	0
N.meningitidis_16S	SeqGr123201_1	1	100	90	0	0	49	138	1	90	2e-41	167	89	87	1
N.meningitidis_16S	SeqGr80609_1	1	96.97	99	3	0	1	99	3	101	2e-41	167	98	88	1
N.meningitidis_16S	SeqGr16064_1	1	98.92	93	1	0	18	110	1	93	2e-41	167	92	89	0
N.meningitidis_16S	SeqGr403120_1	1	98.91	92	1	0	17	108	3	94	6e-41	165	91	90	1
N.meningitidis_16S	SeqGr258372_1	1	100	89	0	0	50	138	1	89	6e-41	165	88	91	4
N.meningitidis_16S	SeqGr101916_1	1	100	89	0	0	66	154	1	89	6e-41	165	88	92	1
N.meningitidis_16S	SeqGr20473_1	1	96.04	101	4	0	7	107	1	101	6e-41	165	100	93	0
N.meningitidis_16S	SeqGr234078_1	1	100	88	0	0	54	141	1	88	2e-40	163	87	94	1
N.meningitidis_16S	SeqGr90349_2	2	100	88	0	0	54	141	1	88	2e-40	163	87	95	2
N.meningitidis_16S	SeqGr75877_1	1	100	88	0	0	52	139	1	88	2e-40	163	87	96	2
N.meningitidis_16S	SeqGr495855_1	1	100	87	0	0	46	132	1	87	8e-40	161	86	97	5
N.meningitidis_16S	SeqGr432910_2	2	100	87	0	0	55	141	1	87	8e-40	161	86	98	6
N.meningitidis_16S	SeqGr418735_1	1	100	87	0	0	54	140	1	87	8e-40	161	86	99	4
N.meningitidis_16S	SeqGr283588_1	1	96.88	96	3	0	1	96	6	101	8e-40	161	95	100	4
N.meningitidis_16S	SeqGr89649_1	1	98.9	91	0	1	115	205	1	90	8e-40	161	89	101	1
N.meningitidis_16S	SeqGr79349_1	1	100	87	0	0	54	140	1	87	8e-40	161	86	102	0
N.meningitidis_16S	SeqGr497734_1	1	100	86	0	0	54	139	1	86	3e-39	159	85	103	1
N.meningitidis_16S	SeqGr482324_1	1	100	86	0	0	42	127	2	87	3e-39	159	85	104	4
N.meningitidis_16S	SeqGr426758_1	1	96.84	95	3	0	1	95	7	101	3e-39	159	94	105	6
N.meningitidis_16S	SeqGr402235_1	1	100	86	0	0	51	136	1	86	3e-39	159	85	106	3
N.meningitidis_16S	SeqGr186104_1	1	100	86	0	0	54	139	1	86	3e-39	159	85	107	3
N.meningitidis_16S	SeqGr170422_1	1	100	86	0	0	55	140	1	86	3e-39	159	85	108	4
N.meningitidis_16S	SeqGr164033_1	1	98.89	90	0	1	116	205	1	89	3e-39	159	88	109	28
N.meningitidis_16S	SeqGr99535_1	1	100	86	0	0	69	154	1	86	3e-39	159	85	110	55
N.meningitidis_16S	SeqGr57812_1	1	100	86	0	0	56	141	1	86	3e-39	159	85	111	76
N.meningitidis_16S	SeqGr9230_1	1	100	86	0	0	54	139	1	86	3e-39	159	85	112	8
N.meningitidis_16S	SeqGr463988_1	1	100	85	0	0	54	138	1	85	1e-38	158	84	113	1
N.meningitidis_16S	SeqGr417554_1	1	100	85	0	0	56	140	1	85	1e-38	158	84	114	10
N.meningitidis_16S	SeqGr272376_1	1	100	85	0	0	57	141	1	85	1e-38	158	84	115	2
N.meningitidis_16S	SeqGr121709_1	1	98.88	89	0	1	117	205	1	88	1e-38	158	87	116	4
N.meningitidis_16S	SeqGr112990_1	1	98.88	89	0	1	116	204	1	88	1e-38	158	87	117	0
N.meningitidis_16S	SeqGr504630_1	1	94.95	99	5	0	25	123	3	101	4e-38	156	98	118	0
N.meningitidis_16S	SeqGr356191_1	1	100	84	0	0	55	138	1	84	4e-38	156	83	119	3
N.meningitidis_16S	SeqGr270283_1	1	100	84	0	0	54	137	1	84	4e-38	156	83	120	0
N.meningitidis_16S	SeqGr145036_1	1	97.8	91	1	1	115	205	1	90	4e-38	156	89	121	1
N.meningitidis_16S	SeqGr24630_1	1	98.85	87	1	0	56	142	1	87	4e-38	156	86	122	4
N.meningitidis_16S	SeqGr531425_1	1	98.85	87	0	1	116	202	1	86	1e-37	154	85	123	8
N.meningitidis_16S	SeqGr474044_1	1	95.79	95	4	0	1	95	7	101	1e-37	154	94	124	5
N.meningitidis_16S	SeqGr416845_1	1	100	83	0	0	59	141	1	83	1e-37	154	82	125	3
N.meningitidis_16S	SeqGr348339_1	1	100	83	0	0	59	141	1	83	1e-37	154	82	126	5
N.meningitidis_16S	SeqGr205661_1	1	100	83	0	0	59	141	1	83	1e-37	154	82	127	3
N.meningitidis_16S	SeqGr46803_1	1	100	83	0	0	59	141	1	83	1e-37	154	82	128	10
N.meningitidis_16S	SeqGr38721_3	3	100	83	0	0	59	141	1	83	1e-37	154	82	129	3
N.meningitidis_16S	SeqGr32987_1	1	98.84	86	1	0	54	139	1	86	1e-37	154	85	130	5
N.meningitidis_16S	SeqGr437541_1	1	100	82	0	0	66	147	1	82	5e-37	152	81	131	5
N.meningitidis_16S	SeqGr300299_1	1	100	82	0	0	59	140	1	82	5e-37	152	81	132	14
N.meningitidis_16S	SeqGr179944_1	1	100	82	0	0	59	140	1	82	5e-37	152	81	133	2
N.meningitidis_16S	SeqGr124758_1	1	100	82	0	0	59	140	1	82	5e-37	152	81	134	15
N.meningitidis_16S	SeqGr92477_1	1	100	82	0	0	59	140	1	82	5e-37	152	81	135	6
N.meningitidis_16S	SeqGr83641_1	1	95.74	94	4	0	1	94	8	101	5e-37	152	93	136	132
N.meningitidis_16S	SeqGr73127_1	1	96.7	91	3	0	1	91	11	101	5e-37	152	90	137	102
N.meningitidis_16S	SeqGr469866_1	1	100	81	0	0	59	139	1	81	2e-36	150	80	138	839
N.meningitidis_16S	SeqGr333297_1	1	100	81	0	0	60	140	1	81	2e-36	150	80	139	413
N.meningitidis_16S	SeqGr230115_1	1	98.81	84	1	0	53	136	1	84	2e-36	150	83	140	1829
N.meningitidis_16S	SeqGr170491_1	1	96.67	90	3	0	1	90	12	101	2e-36	150	89	141	2431
N.meningitidis_16S	SeqGr105719_1	1	100	81	0	0	62	142	1	81	2e-36	150	80	142	292
N.meningitidis_16S	SeqGr93938_1	1	100	81	0	0	62	142	1	81	2e-36	150	80	143	8
N.meningitidis_16S	SeqGr529556_1	1	100	80	0	0	62	141	1	80	6e-36	148	79	144	2
N.meningitidis_16S	SeqGr439066_1	1	100	80	0	0	59	138	1	80	6e-36	148	79	145	0
N.meningitidis_16S	SeqGr371533_1	1	100	80	0	0	62	141	1	80	6e-36	148	79	146	2
N.meningitidis_16S	SeqGr321777_1	1	100	80	0	0	61	140	3	82	6e-36	148	79	147	9
N.meningitidis_16S	SeqGr315287_1	1	100	80	0	0	62	141	1	80	6e-36	148	79	148	36
N.meningitidis_16S	SeqGr229679_1	1	100	80	0	0	59	138	1	80	6e-36	148	79	149	2
N.meningitidis_16S	SeqGr90199_1	1	98.8	83	1	0	54	136	1	83	6e-36	148	82	150	7
N.meningitidis_16S	SeqGr38794_1	1	98.8	83	1	0	59	141	1	83	6e-36	148	82	151	7
N.meningitidis_16S	SeqGr17386_2	2	100	80	0	0	62	141	1	80	6e-36	148	79	152	40
N.meningitidis_16S	SeqGr477005_1	1	100	79	0	0	62	140	1	79	2e-35	147	78	153	98
N.meningitidis_16S	SeqGr379968_1	1	100	79	0	0	33	111	1	79	2e-35	147	78	154	79
N.meningitidis_16S	SeqGr332796_1	1	100	79	0	0	61	139	1	79	2e-35	147	78	155	4
N.meningitidis_16S	SeqGr281921_1	1	100	79	0	0	63	141	1	79	2e-35	147	78	156	3
N.meningitidis_16S	SeqGr246719_1	1	96.59	88	3	0	1	88	14	101	2e-35	147	87	157	12
N.meningitidis_16S	SeqGr206336_1	1	100	79	0	0	63	141	1	79	2e-35	147	78	158	8
N.meningitidis_16S	SeqGr177059_1	1	100	79	0	0	62	140	1	79	2e-35	147	78	159	1
N.meningitidis_16S	SeqGr147174_1	1	100	79	0	0	62	140	1	79	2e-35	147	78	160	0
N.meningitidis_16S	SeqGr134772_1	1	95.6	91	4	0	1	91	11	101	2e-35	147	90	161	0
N.meningitidis_16S	SeqGr121604_1	1	100	79	0	0	63	141	1	79	2e-35	147	78	162	0
N.meningitidis_16S	SeqGr116503_1	1	100	79	0	0	62	140	1	79	2e-35	147	78	163	0
N.meningitidis_16S	SeqGr17416_1	1	100	79	0	0	62	140	1	79	2e-35	147	78	164	2
N.meningitidis_16S	SeqGr7894_2	2	100	79	0	0	62	140	1	79	2e-35	147	78	165	0
N.meningitidis_16S	SeqGr525218_1	1	98.77	81	1	0	59	139	1	81	8e-35	145	80	166	2
N.meningitidis_16S	SeqGr394183_1	1	96.55	87	3	0	1	87	15	101	8e-35	145	86	167	4
N.meningitidis_16S	SeqGr333586_1	1	100	78	0	0	50	127	1	78	8e-35	145	77	168	1
N.meningitidis_16S	SeqGr168987_1	1	100	78	0	0	59	136	1	78	8e-35	145	77	169	0
N.meningitidis_16S	SeqGr118385_1	1	100	78	0	0	62	139	1	78	8e-35	145	77	170	0
N.meningitidis_16S	SeqGr115451_1	1	98.78	82	0	1	115	196	1	81	8e-35	145	80	171	5
N.meningitidis_16S	SeqGr109478_1	1	100	78	0	0	63	140	1	78	8e-35	145	77	172	29
N.meningitidis_16S	SeqGr94117_1	1	100	78	0	0	64	141	1	78	8e-35	145	77	173	8
N.meningitidis_16S	SeqGr68263_1	1	100	78	0	0	62	139	1	78	8e-35	145	77	174	8
N.meningitidis_16S	SeqGr50772_1	1	100	78	0	0	59	136	1	78	8e-35	145	77	175	17
N.meningitidis_16S	SeqGr12855_2	2	100	78	0	0	63	140	1	78	8e-35	145	77	176	11
N.meningitidis_16S	SeqGr10418_2	2	100	78	0	0	64	141	1	78	8e-35	145	77	177	3
N.meningitidis_16S	SeqGr507641_1	1	98.77	81	0	1	125	205	1	80	3e-34	143	79	178	15
N.meningitidis_16S	SeqGr377638_1	1	100	77	0	0	72	148	1	77	3e-34	143	76	179	11
N.meningitidis_16S	SeqGr336945_1	1	100	77	0	0	64	140	1	77	3e-34	143	76	180	18
N.meningitidis_16S	SeqGr329180_1	1	100	77	0	0	63	139	1	77	3e-34	143	76	181	2
N.meningitidis_16S	SeqGr237011_1	1	100	77	0	0	62	138	1	77	3e-34	143	76	182	5
N.meningitidis_16S	SeqGr226466_1	1	100	77	0	0	62	138	1	77	3e-34	143	76	183	13
N.meningitidis_16S	SeqGr216909_1	1	100	77	0	0	62	138	1	77	3e-34	143	76	184	10
N.meningitidis_16S	SeqGr213418_1	1	100	77	0	0	62	138	1	77	3e-34	143	76	185	104
N.meningitidis_16S	SeqGr196211_1	1	100	77	0	0	60	136	1	77	3e-34	143	76	186	9
N.meningitidis_16S	SeqGr173134_2	2	100	77	0	0	65	141	1	77	3e-34	143	76	187	23
N.meningitidis_16S	SeqGr169277_1	1	100	77	0	0	65	141	1	77	3e-34	143	76	188	63
N.meningitidis_16S	SeqGr131573_1	1	98.75	80	1	0	62	141	1	80	3e-34	143	79	189	30
N.meningitidis_16S	SeqGr95652_1	1	100	77	0	0	65	141	1	77	3e-34	143	76	190	100
N.meningitidis_16S	SeqGr61589_1	1	98.75	80	1	0	62	141	1	80	3e-34	143	79	191	52
N.meningitidis_16S	SeqGr49222_3	3	100	77	0	0	66	142	1	77	3e-34	143	76	192	164
N.meningitidis_16S	SeqGr42053_1	1	98.75	80	1	0	62	141	1	80	3e-34	143	79	193	46
N.meningitidis_16S	SeqGr470909_1	1	100	76	0	0	63	138	1	76	1e-33	141	75	194	74
N.meningitidis_16S	SeqGr395097_1	1	100	76	0	0	63	138	1	76	1e-33	141	75	195	63
N.meningitidis_16S	SeqGr385473_1	1	100	76	0	0	65	140	1	76	1e-33	141	75	196	140
N.meningitidis_16S	SeqGr351837_1	1	100	76	0	0	63	138	1	76	1e-33	141	75	197	6
N.meningitidis_16S	SeqGr324336_1	1	100	76	0	0	66	141	1	76	1e-33	141	75	198	17
N.meningitidis_16S	SeqGr324100_1	1	100	76	0	0	65	140	1	76	1e-33	141	75	199	38
N.meningitidis_16S	SeqGr317490_1	1	98.73	79	1	0	62	140	1	79	1e-33	141	78	200	12
N.meningitidis_16S	SeqGr317235_1	1	100	76	0	0	66	141	1	76	1e-33	141	75	201	12
N.meningitidis_16S	SeqGr313493_1	1	100	76	0	0	66	141	1	76	1e-33	141	75	202	90
N.meningitidis_16S	SeqGr304997_1	1	100	76	0	0	64	139	1	76	1e-33	141	75	203	63
N.meningitidis_16S	SeqGr298866_1	1	98.73	79	1	0	66	144	1	79	1e-33	141	78	204	212
N.meningitidis_16S	SeqGr292095_1	1	100	76	0	0	67	142	1	76	1e-33	141	75	205	1731
N.meningitidis_16S	SeqGr282972_1	1	100	76	0	0	66	141	1	76	1e-33	141	75
N.meningitidis_16S	SeqGr191949_1	1	100	76	0	0	66	141	1	76	1e-33	141	75
N.meningitidis_16S	SeqGr132244_1	1	100	76	0	0	66	141	1	76	1e-33	141	75
N.meningitidis_16S	SeqGr99176_1	1	100	76	0	0	66	141	1	76	1e-33	141	75
N.meningitidis_16S	SeqGr45324_1	1	100	76	0	0	66	141	1	76	1e-33	141	75
N.meningitidis_16S	SeqGr14245_3	3	100	76	0	0	66	141	1	76	1e-33	141	75
N.meningitidis_16S	SeqGr6010_4	4	100	76	0	0	65	140	1	76	1e-33	141	75
N.meningitidis_16S	SeqGr1537_16	16	100	76	0	0	66	141	1	76	1e-33	141	75
N.meningitidis_16S	SeqGr461880_1	1	100	75	0	0	62	136	1	75	4e-33	139	74
N.meningitidis_16S	SeqGr378501_1	1	100	75	0	0	66	140	1	75	4e-33	139	74
N.meningitidis_16S	SeqGr361164_1	1	100	75	0	0	66	140	1	75	4e-33	139	74
N.meningitidis_16S	SeqGr343128_1	1	100	75	0	0	65	139	1	75	4e-33	139	74
N.meningitidis_16S	SeqGr331907_1	1	100	75	0	0	66	140	1	75	4e-33	139	74
N.meningitidis_16S	SeqGr331473_1	1	100	75	0	0	66	140	1	75	4e-33	139	74
N.meningitidis_16S	SeqGr259010_1	1	100	75	0	0	66	140	1	75	4e-33	139	74
N.meningitidis_16S	SeqGr243866_1	1	100	75	0	0	62	136	1	75	4e-33	139	74
N.meningitidis_16S	SeqGr178718_1	1	100	75	0	0	66	140	1	75	4e-33	139	74
N.meningitidis_16S	SeqGr172712_1	1	100	75	0	0	64	138	1	75	4e-33	139	74
N.meningitidis_16S	SeqGr99787_2	2	100	75	0	0	66	140	1	75	4e-33	139	74
N.meningitidis_16S	SeqGr87963_2	2	100	75	0	0	67	141	1	75	4e-33	139	74
N.meningitidis_16S	SeqGr15005_9	9	100	75	0	0	66	140	1	75	4e-33	139	74
N.meningitidis_16S	SeqGr8717_4	4	100	75	0	0	66	140	1	75	4e-33	139	74
N.meningitidis_16S	SeqGr6831_2	2	100	75	0	0	67	141	1	75	4e-33	139	74
N.meningitidis_16S	SeqGr6392_16	16	100	75	0	0	66	140	1	75	4e-33	139	74
N.meningitidis_16S	SeqGr4186_1	1	100	75	0	0	68	142	1	75	4e-33	139	74
N.meningitidis_16S	SeqGr515327_1	1	98.7	77	1	0	64	140	1	77	1e-32	137	76
N.meningitidis_16S	SeqGr495661_1	1	100	74	0	0	67	140	1	74	1e-32	137	73
N.meningitidis_16S	SeqGr492859_1	1	100	74	0	0	67	140	1	74	1e-32	137	73
N.meningitidis_16S	SeqGr453577_1	1	100	74	0	0	68	141	1	74	1e-32	137	73
N.meningitidis_16S	SeqGr428451_1	1	100	74	0	0	66	139	1	74	1e-32	137	73
N.meningitidis_16S	SeqGr364225_1	1	98.7	77	1	0	65	141	1	77	1e-32	137	76
N.meningitidis_16S	SeqGr360678_1	1	100	74	0	0	66	139	1	74	1e-32	137	73
N.meningitidis_16S	SeqGr360116_1	1	96.39	83	3	0	1	83	19	101	1e-32	137	82
N.meningitidis_16S	SeqGr345683_1	1	98.7	77	1	0	65	141	1	77	1e-32	137	76
N.meningitidis_16S	SeqGr293235_2	2	100	74	0	0	66	139	1	74	1e-32	137	73
N.meningitidis_16S	SeqGr266813_1	1	100	74	0	0	63	136	1	74	1e-32	137	73
N.meningitidis_16S	SeqGr265832_1	1	98.7	77	1	0	62	138	1	77	1e-32	137	76
N.meningitidis_16S	SeqGr162733_3	3	100	74	0	0	67	140	1	74	1e-32	137	73
N.meningitidis_16S	SeqGr134190_1	1	100	74	0	0	66	139	1	74	1e-32	137	73
N.meningitidis_16S	SeqGr101344_2	2	100	74	0	0	65	138	1	74	1e-32	137	73
N.meningitidis_16S	SeqGr94350_4	4	100	74	0	0	67	140	1	74	1e-32	137	73
N.meningitidis_16S	SeqGr67730_1	1	96.39	83	3	0	1	83	19	101	1e-32	137	82
N.meningitidis_16S	SeqGr14911_4	4	100	74	0	0	69	142	1	74	1e-32	137	73
N.meningitidis_16S	SeqGr10239_2	2	100	74	0	0	65	138	1	74	1e-32	137	73
N.meningitidis_16S	SeqGr1385_4	4	100	74	0	0	66	139	1	74	1e-32	137	73
N.meningitidis_16S	SeqGr818_5	5	100	74	0	0	66	139	1	74	1e-32	137	73
N.meningitidis_16S	SeqGr495512_1	1	98.68	76	1	0	66	141	1	76	5e-32	135	75
N.meningitidis_16S	SeqGr490016_1	1	100	73	0	0	69	141	1	73	5e-32	135	72
N.meningitidis_16S	SeqGr470725_1	1	98.68	76	1	0	66	141	1	76	5e-32	135	75
N.meningitidis_16S	SeqGr454808_1	1	98.68	76	1	0	63	138	1	76	5e-32	135	75
N.meningitidis_16S	SeqGr418718_1	1	97.47	79	2	0	62	140	1	79	5e-32	135	78
N.meningitidis_16S	SeqGr412072_1	1	98.68	76	1	0	66	141	1	76	5e-32	135	75
N.meningitidis_16S	SeqGr375763_1	1	98.68	76	1	0	66	141	1	76	5e-32	135	75
N.meningitidis_16S	SeqGr367525_1	1	100	73	0	0	64	136	1	73	5e-32	135	72
N.meningitidis_16S	SeqGr361640_1	1	98.68	76	1	0	66	141	1	76	5e-32	135	75
N.meningitidis_16S	SeqGr360376_1	1	98.68	76	1	0	66	141	1	76	5e-32	135	75
N.meningitidis_16S	SeqGr355168_1	1	98.68	76	1	0	66	141	1	76	5e-32	135	75
N.meningitidis_16S	SeqGr351759_1	1	100	73	0	0	66	138	2	74	5e-32	135	72
N.meningitidis_16S	SeqGr342661_1	1	98.68	76	1	0	66	141	1	76	5e-32	135	75
N.meningitidis_16S	SeqGr337264_1	1	100	73	0	0	69	141	4	76	5e-32	135	72
N.meningitidis_16S	SeqGr324475_1	1	100	73	0	0	67	139	1	73	5e-32	135	72
N.meningitidis_16S	SeqGr319525_1	1	100	73	0	0	67	139	2	74	5e-32	135	72
N.meningitidis_16S	SeqGr294647_1	1	100	73	0	0	66	138	1	73	5e-32	135	72
N.meningitidis_16S	SeqGr291379_1	1	98.68	76	1	0	66	141	1	76	5e-32	135	75
N.meningitidis_16S	SeqGr251823_1	1	100	73	0	0	64	136	1	73	5e-32	135	72
N.meningitidis_16S	SeqGr210980_1	1	98.68	76	1	0	66	141	1	76	5e-32	135	75
N.meningitidis_16S	SeqGr206920_1	1	100	73	0	0	69	141	1	73	5e-32	135	72
N.meningitidis_16S	SeqGr206034_6	6	100	73	0	0	66	138	1	73	5e-32	135	72
N.meningitidis_16S	SeqGr158750_1	1	98.68	76	1	0	66	141	1	76	5e-32	135	75
N.meningitidis_16S	SeqGr127083_4	4	100	73	0	0	66	138	1	73	5e-32	135	72
N.meningitidis_16S	SeqGr105964_1	1	100	73	0	0	66	138	1	73	5e-32	135	72
N.meningitidis_16S	SeqGr103275_1	1	98.68	76	1	0	66	141	1	76	5e-32	135	75
N.meningitidis_16S	SeqGr98808_4	4	100	73	0	0	69	141	1	73	5e-32	135	72
N.meningitidis_16S	SeqGr87938_2	2	100	73	0	0	67	139	1	73	5e-32	135	72
N.meningitidis_16S	SeqGr75443_1	1	98.68	76	1	0	66	141	1	76	5e-32	135	75
N.meningitidis_16S	SeqGr74181_1	1	98.68	76	1	0	64	139	1	76	5e-32	135	75
N.meningitidis_16S	SeqGr73641_1	1	98.68	76	1	0	66	141	1	76	5e-32	135	75
N.meningitidis_16S	SeqGr28568_1	1	98.68	76	1	0	66	141	1	76	5e-32	135	75
N.meningitidis_16S	SeqGr27763_16	16	100	73	0	0	69	141	1	73	5e-32	135	72
N.meningitidis_16S	SeqGr14503_1	1	98.68	76	1	0	66	141	1	76	5e-32	135	75
N.meningitidis_16S	SeqGr13422_10	10	100	73	0	0	66	138	1	73	5e-32	135	72
N.meningitidis_16S	SeqGr2445_3	3	100	73	0	0	68	140	1	73	5e-32	135	72
N.meningitidis_16S	SeqGr1943_13	13	100	73	0	0	66	138	1	73	5e-32	135	72
N.meningitidis_16S	SeqGr512938_1	1	98.67	75	1	0	67	141	1	75	2e-31	134	74
N.meningitidis_16S	SeqGr512536_1	1	98.67	75	1	0	66	140	1	75	2e-31	134	74
N.meningitidis_16S	SeqGr512336_1	1	100	72	0	0	67	138	1	72	2e-31	134	71
N.meningitidis_16S	SeqGr509429_1	1	97.44	78	2	0	64	141	1	78	2e-31	134	77
N.meningitidis_16S	SeqGr487668_1	1	98.67	75	1	0	66	140	1	75	2e-31	134	74
N.meningitidis_16S	SeqGr450176_1	1	98.67	75	1	0	66	140	1	75	2e-31	134	74
N.meningitidis_16S	SeqGr420757_1	1	98.67	75	1	0	66	140	1	75	2e-31	134	74
N.meningitidis_16S	SeqGr420743_1	1	98.67	75	1	0	66	140	1	75	2e-31	134	74
N.meningitidis_16S	SeqGr398688_2	2	100	72	0	0	66	137	1	72	2e-31	134	71
N.meningitidis_16S	SeqGr363456_1	1	98.67	75	1	0	66	140	1	75	2e-31	134	74
N.meningitidis_16S	SeqGr357089_1	1	98.67	75	1	0	66	140	1	75	2e-31	134	74
N.meningitidis_16S	SeqGr288302_1	1	100	72	0	0	67	138	1	72	2e-31	134	71
N.meningitidis_16S	SeqGr256102_2	2	100	72	0	0	65	136	1	72	2e-31	134	71
N.meningitidis_16S	SeqGr205399_1	1	98.67	75	1	0	66	140	1	75	2e-31	134	74
N.meningitidis_16S	SeqGr202466_1	1	100	72	0	0	69	140	1	72	2e-31	134	71
N.meningitidis_16S	SeqGr193269_1	1	100	72	0	0	66	137	1	72	2e-31	134	71
N.meningitidis_16S	SeqGr140967_3	3	100	72	0	0	66	137	1	72	2e-31	134	71
N.meningitidis_16S	SeqGr114217_1	1	98.67	75	1	0	66	140	1	75	2e-31	134	74
N.meningitidis_16S	SeqGr83440_8	8	100	72	0	0	70	141	1	72	2e-31	134	71
N.meningitidis_16S	SeqGr46699_6	6	100	72	0	0	69	140	1	72	2e-31	134	71
N.meningitidis_16S	SeqGr42866_23	23	100	72	0	0	69	140	1	72	2e-31	134	71
N.meningitidis_16S	SeqGr41728_1	1	98.67	75	1	0	67	141	1	75	2e-31	134	74
N.meningitidis_16S	SeqGr36213_8	8	100	72	0	0	69	140	1	72	2e-31	134	71
N.meningitidis_16S	SeqGr35598_1	1	98.67	75	1	0	66	140	1	75	2e-31	134	74
N.meningitidis_16S	SeqGr31474_1	1	98.67	75	1	0	62	136	1	75	2e-31	134	74
N.meningitidis_16S	SeqGr25004_2	2	98.67	75	1	0	66	140	1	75	2e-31	134	74
N.meningitidis_16S	SeqGr14225_1	1	98.67	75	1	0	66	140	1	75	2e-31	134	74
N.meningitidis_16S	SeqGr9102_1	1	98.67	75	1	0	66	140	1	75	2e-31	134	74
N.meningitidis_16S	SeqGr524621_1	1	96.25	80	3	0	1	80	22	101	6e-31	132	79
N.meningitidis_16S	SeqGr508933_1	1	100	71	0	0	68	138	1	71	6e-31	132	70
N.meningitidis_16S	SeqGr502267_1	1	100	71	0	0	64	134	1	71	6e-31	132	70
N.meningitidis_16S	SeqGr488035_1	1	100	71	0	0	68	138	1	71	6e-31	132	70
N.meningitidis_16S	SeqGr323921_1	1	100	71	0	0	69	139	1	71	6e-31	132	70
N.meningitidis_16S	SeqGr322668_1	1	100	71	0	0	68	138	1	71	6e-31	132	70
N.meningitidis_16S	SeqGr315903_1	1	96.25	80	3	0	1	80	22	101	6e-31	132	79
N.meningitidis_16S	SeqGr297633_2	2	100	71	0	0	67	137	1	71	6e-31	132	70
N.meningitidis_16S	SeqGr208457_1	1	100	71	0	0	68	138	1	71	6e-31	132	70
N.meningitidis_16S	SeqGr199154_1	1	97.4	77	2	0	66	142	1	77	6e-31	132	76
N.meningitidis_16S	SeqGr159593_2	2	100	71	0	0	70	140	1	71	6e-31	132	70
N.meningitidis_16S	SeqGr142720_4	4	100	71	0	0	69	139	1	71	6e-31	132	70
N.meningitidis_16S	SeqGr127493_8	8	100	71	0	0	70	140	1	71	6e-31	132	70
N.meningitidis_16S	SeqGr94806_5	5	100	71	0	0	71	141	1	71	6e-31	132	70
N.meningitidis_16S	SeqGr89806_1	1	98.65	74	1	0	67	140	1	74	6e-31	132	73
N.meningitidis_16S	SeqGr73748_1	1	98.65	74	1	0	66	139	1	74	6e-31	132	73
N.meningitidis_16S	SeqGr55016_3	3	100	71	0	0	70	140	1	71	6e-31	132	70
N.meningitidis_16S	SeqGr40799_12	12	100	71	0	0	66	136	1	71	6e-31	132	70
N.meningitidis_16S	SeqGr39326_1	1	95.18	83	4	0	1	83	19	101	6e-31	132	82
N.meningitidis_16S	SeqGr7486_6	6	100	71	0	0	66	136	1	71	6e-31	132	70
N.meningitidis_16S	SeqGr508939_1	1	96.2	79	3	0	1	79	23	101	2e-30	130	78
N.meningitidis_16S	SeqGr492935_1	1	100	70	0	0	71	140	1	70	2e-30	130	69
N.meningitidis_16S	SeqGr406702_1	1	100	70	0	0	70	139	1	70	2e-30	130	69
N.meningitidis_16S	SeqGr359914_1	1	97.37	76	2	0	66	141	1	76	2e-30	130	75
N.meningitidis_16S	SeqGr359328_2	2	100	70	0	0	67	136	1	70	2e-30	130	69
N.meningitidis_16S	SeqGr349652_1	1	100	70	0	0	69	138	1	70	2e-30	130	69
N.meningitidis_16S	SeqGr325296_1	1	98.63	73	1	0	69	141	1	73	2e-30	130	72
N.meningitidis_16S	SeqGr304331_2	2	100	70	0	0	71	140	1	70	2e-30	130	69
N.meningitidis_16S	SeqGr302645_1	1	97.37	76	2	0	66	141	1	76	2e-30	130	75
N.meningitidis_16S	SeqGr276769_1	1	98.63	73	1	0	69	141	1	73	2e-30	130	72
N.meningitidis_16S	SeqGr270047_1	1	97.37	76	2	0	66	141	1	76	2e-30	130	75
N.meningitidis_16S	SeqGr247875_1	1	97.37	76	2	0	66	141	1	76	2e-30	130	75
N.meningitidis_16S	SeqGr220981_1	1	100	70	0	0	69	138	1	70	2e-30	130	69
N.meningitidis_16S	SeqGr197785_1	1	100	70	0	0	67	136	1	70	2e-30	130	69
N.meningitidis_16S	SeqGr178506_3	3	100	70	0	0	69	138	1	70	2e-30	130	69
N.meningitidis_16S	SeqGr157297_1	1	97.37	76	2	0	66	141	1	76	2e-30	130	75
N.meningitidis_16S	SeqGr150431_3	3	100	70	0	0	69	138	1	70	2e-30	130	69
N.meningitidis_16S	SeqGr99526_1	1	100	70	0	0	63	132	1	70	2e-30	130	69
N.meningitidis_16S	SeqGr93288_11	11	100	70	0	0	69	138	1	70	2e-30	130	69
N.meningitidis_16S	SeqGr82425_1	1	98.63	73	1	0	69	141	1	73	2e-30	130	72
N.meningitidis_16S	SeqGr77567_1	1	98.63	73	1	0	66	138	1	73	2e-30	130	72
N.meningitidis_16S	SeqGr77255_3	3	100	70	0	0	72	141	1	70	2e-30	130	69
N.meningitidis_16S	SeqGr68171_1	1	98.63	73	1	0	69	141	1	73	2e-30	130	72
N.meningitidis_16S	SeqGr63935_2	2	100	70	0	0	72	141	1	70	2e-30	130	69
N.meningitidis_16S	SeqGr54381_1	1	96.2	79	3	0	1	79	23	101	2e-30	130	78
N.meningitidis_16S	SeqGr36911_1	1	100	70	0	0	69	138	1	70	2e-30	130	69
N.meningitidis_16S	SeqGr34123_1	1	97.37	76	2	0	66	141	1	76	2e-30	130	75
N.meningitidis_16S	SeqGr27846_2	2	98.63	73	1	0	66	138	1	73	2e-30	130	72
N.meningitidis_16S	SeqGr25567_1	1	98.63	73	1	0	66	138	1	73	2e-30	130	72
N.meningitidis_16S	SeqGr16391_1	1	98.63	73	1	0	66	138	1	73	2e-30	130	72
N.meningitidis_16S	SeqGr9199_1	1	100	70	0	0	66	135	1	70	2e-30	130	69
N.meningitidis_16S	SeqGr467870_1	1	100	69	0	0	72	140	3	71	8e-30	128	68
N.meningitidis_16S	SeqGr413360_1	1	96.15	78	3	0	1	78	23	100	8e-30	128	77
N.meningitidis_16S	SeqGr412067_1	1	100	69	0	0	70	138	1	69	8e-30	128	68
N.meningitidis_16S	SeqGr347241_1	1	100	69	0	0	42	110	1	69	8e-30	128	68
N.meningitidis_16S	SeqGr338578_1	1	98.61	72	1	0	34	105	1	72	8e-30	128	71
N.meningitidis_16S	SeqGr319057_5	5	100	69	0	0	70	138	1	69	8e-30	128	68
N.meningitidis_16S	SeqGr303577_1	1	98.61	72	1	0	69	140	1	72	8e-30	128	71
N.meningitidis_16S	SeqGr290043_1	1	98.63	73	0	1	133	205	1	72	8e-30	128	71
N.meningitidis_16S	SeqGr274669_2	2	100	69	0	0	72	140	1	69	8e-30	128	68
N.meningitidis_16S	SeqGr272475_1	1	98.61	72	1	0	65	136	4	75	8e-30	128	71
N.meningitidis_16S	SeqGr242124_1	1	100	69	0	0	69	137	1	69	8e-30	128	68
N.meningitidis_16S	SeqGr229017_2	2	100	69	0	0	69	137	1	69	8e-30	128	68
N.meningitidis_16S	SeqGr201513_1	1	97.33	75	2	0	66	140	1	75	8e-30	128	74
N.meningitidis_16S	SeqGr193019_2	2	100	69	0	0	66	134	1	69	8e-30	128	68
N.meningitidis_16S	SeqGr63437_1	1	96.15	78	3	0	1	78	24	101	8e-30	128	77
N.meningitidis_16S	SeqGr43676_1	1	100	69	0	0	69	137	1	69	8e-30	128	68
N.meningitidis_16S	SeqGr31400_1	1	97.33	75	2	0	66	140	1	75	8e-30	128	74
N.meningitidis_16S	SeqGr31265_1	1	98.61	72	1	0	69	140	1	72	8e-30	128	71
N.meningitidis_16S	SeqGr533621_1	1	100	68	0	0	72	139	1	68	3e-29	126	67
N.meningitidis_16S	SeqGr524817_1	1	98.59	71	1	0	68	138	1	71	3e-29	126	70
N.meningitidis_16S	SeqGr512943_1	1	98.59	71	1	0	66	136	1	71	3e-29	126	70
N.meningitidis_16S	SeqGr409676_1	1	97.3	74	2	0	66	139	1	74	3e-29	126	73
N.meningitidis_16S	SeqGr391264_1	1	98.59	71	1	0	66	136	1	71	3e-29	126	70
N.meningitidis_16S	SeqGr357293_1	1	97.3	74	2	0	67	140	1	74	3e-29	126	73
N.meningitidis_16S	SeqGr351066_1	1	97.3	74	2	0	66	139	1	74	3e-29	126	73
N.meningitidis_16S	SeqGr349346_1	1	98.61	72	0	1	134	205	1	71	3e-29	126	70
N.meningitidis_16S	SeqGr331534_1	1	98.59	71	1	0	66	136	1	71	3e-29	126	70
N.meningitidis_16S	SeqGr323232_1	1	98.59	71	1	0	69	139	1	71	3e-29	126	70
N.meningitidis_16S	SeqGr272010_1	1	100	68	0	0	73	140	1	68	3e-29	126	67
N.meningitidis_16S	SeqGr264482_1	1	100	68	0	0	70	137	1	68	3e-29	126	67
N.meningitidis_16S	SeqGr261595_1	1	98.59	71	1	0	66	136	1	71	3e-29	126	70
N.meningitidis_16S	SeqGr229893_1	1	100	68	0	0	71	138	1	68	3e-29	126	67
N.meningitidis_16S	SeqGr229624_1	1	100	68	0	0	66	133	1	68	3e-29	126	67
N.meningitidis_16S	SeqGr120114_1	1	100	68	0	0	72	139	1	68	3e-29	126	67
N.meningitidis_16S	SeqGr117095_1	1	100	68	0	0	69	136	1	68	3e-29	126	67
N.meningitidis_16S	SeqGr110238_8	8	100	68	0	0	69	136	1	68	3e-29	126	67
N.meningitidis_16S	SeqGr100738_1	1	98.59	71	1	0	70	140	1	71	3e-29	126	70
N.meningitidis_16S	SeqGr89914_1	1	100	68	0	0	65	132	1	68	3e-29	126	67
N.meningitidis_16S	SeqGr43444_7	7	100	68	0	0	69	136	1	68	3e-29	126	67
N.meningitidis_16S	SeqGr32357_1	1	98.59	71	1	0	66	136	1	71	3e-29	126	70
N.meningitidis_16S	SeqGr22427_1	1	98.59	71	1	0	70	140	1	71	3e-29	126	70
N.meningitidis_16S	SeqGr11407_2	2	100	68	0	0	70	137	1	68	3e-29	126	67
N.meningitidis_16S	SeqGr3086_1	1	96.1	77	3	0	1	77	25	101	3e-29	126	76
N.meningitidis_16S	SeqGr527400_1	1	98.57	70	1	0	67	136	1	70	1e-28	124	69
N.meningitidis_16S	SeqGr431606_1	1	98.57	70	1	0	63	132	1	70	1e-28	124	69
N.meningitidis_16S	SeqGr423937_1	1	100	67	0	0	70	136	2	68	1e-28	124	66
N.meningitidis_16S	SeqGr383077_1	1	100	67	0	0	69	135	1	67	1e-28	124	66
N.meningitidis_16S	SeqGr377583_1	1	100	67	0	0	69	135	1	67	1e-28	124	66
N.meningitidis_16S	SeqGr352875_1	1	94.94	79	4	0	1	79	23	101	1e-28	124	78
N.meningitidis_16S	SeqGr343050_1	1	96.05	76	3	0	1	76	26	101	1e-28	124	75
N.meningitidis_16S	SeqGr211268_1	1	100	67	0	0	66	132	1	67	1e-28	124	66
N.meningitidis_16S	SeqGr128349_3	3	100	67	0	0	66	132	1	67	1e-28	124	66
N.meningitidis_16S	SeqGr120554_4	4	100	67	0	0	70	136	1	67	1e-28	124	66
N.meningitidis_16S	SeqGr109936_1	1	100	67	0	0	72	138	1	67	1e-28	124	66
N.meningitidis_16S	SeqGr91513_1	1	97.26	73	2	0	66	138	1	73	1e-28	124	72
N.meningitidis_16S	SeqGr55644_1	1	100	67	0	0	70	136	1	67	1e-28	124	66
N.meningitidis_16S	SeqGr29127_1	1	100	67	0	0	70	136	1	67	1e-28	124	66
N.meningitidis_16S	SeqGr417688_1	1	100	66	0	0	69	134	1	66	4e-28	122	65
N.meningitidis_16S	SeqGr394925_1	1	100	66	0	0	42	107	1	66	4e-28	122	65
N.meningitidis_16S	SeqGr379122_1	1	98.55	69	1	0	72	140	1	69	4e-28	122	68
N.meningitidis_16S	SeqGr351827_1	1	100	66	0	0	69	134	1	66	4e-28	122	65
N.meningitidis_16S	SeqGr350021_1	1	97.22	72	2	0	69	140	1	72	4e-28	122	71
N.meningitidis_16S	SeqGr349756_1	1	98.55	69	1	0	72	140	1	69	4e-28	122	68
N.meningitidis_16S	SeqGr342854_1	1	96	75	3	0	62	136	1	75	4e-28	122	74
N.meningitidis_16S	SeqGr308281_1	1	96	75	3	0	67	141	1	75	4e-28	122	74
N.meningitidis_16S	SeqGr297559_1	1	98.57	70	0	1	136	205	1	69	4e-28	122	68
N.meningitidis_16S	SeqGr265491_1	1	98.55	69	1	0	69	137	1	69	4e-28	122	68
N.meningitidis_16S	SeqGr260011_1	1	100	66	0	0	72	137	1	66	4e-28	122	65
N.meningitidis_16S	SeqGr80456_1	1	98.57	70	0	1	133	202	1	69	4e-28	122	68
N.meningitidis_16S	SeqGr65888_1	1	96	75	3	0	1	75	27	101	4e-28	122	74
N.meningitidis_16S	SeqGr57498_1	1	96	75	3	0	1	75	27	101	4e-28	122	74
N.meningitidis_16S	SeqGr51396_1	1	100	66	0	0	66	131	1	66	4e-28	122	65
N.meningitidis_16S	SeqGr37443_1	1	96	75	3	0	1	75	27	101	4e-28	122	74
N.meningitidis_16S	SeqGr15657_2	2	100	66	0	0	66	131	1	66	4e-28	122	65
N.meningitidis_16S	SeqGr476659_1	1	100	65	0	0	33	97	1	65	1e-27	121	64
N.meningitidis_16S	SeqGr464018_1	1	100	65	0	0	66	130	1	65	1e-27	121	64
N.meningitidis_16S	SeqGr463633_1	1	100	65	0	0	66	130	1	65	1e-27	121	64
N.meningitidis_16S	SeqGr446079_1	1	95.95	74	3	0	1	74	28	101	1e-27	121	73
N.meningitidis_16S	SeqGr357699_1	1	100	65	0	0	72	136	1	65	1e-27	121	64
N.meningitidis_16S	SeqGr304490_1	1	100	65	0	0	72	136	1	65	1e-27	121	64
N.meningitidis_16S	SeqGr62170_2	2	100	65	0	0	66	130	1	65	1e-27	121	64
N.meningitidis_16S	SeqGr475871_1	1	93.67	79	5	0	1	79	23	101	5e-27	119	78
N.meningitidis_16S	SeqGr332769_1	1	98.51	67	1	0	75	141	1	67	5e-27	119	66
N.meningitidis_16S	SeqGr316552_1	1	98.53	68	0	1	73	140	1	67	5e-27	119	66
N.meningitidis_16S	SeqGr253517_2	2	100	64	0	0	69	132	1	64	5e-27	119	63
N.meningitidis_16S	SeqGr232012_1	1	98.53	68	0	1	69	136	1	67	5e-27	119	66
N.meningitidis_16S	SeqGr186392_1	1	97.14	70	2	0	69	138	1	70	5e-27	119	69
N.meningitidis_16S	SeqGr164132_1	1	100	64	0	0	72	135	1	64	5e-27	119	63
N.meningitidis_16S	SeqGr109291_1	1	95.89	73	3	0	1	73	29	101	5e-27	119	72
N.meningitidis_16S	SeqGr92681_1	1	100	64	0	0	71	134	1	64	5e-27	119	63
N.meningitidis_16S	SeqGr28616_1	1	100	64	0	0	42	105	1	64	5e-27	119	63
N.meningitidis_16S	SeqGr17839_1	1	98.53	68	0	1	138	205	1	67	5e-27	119	66
N.meningitidis_16S	SeqGr7302_1	1	98.51	67	1	0	66	132	1	67	5e-27	119	66
N.meningitidis_16S	SeqGr343240_1	1	100	63	0	0	67	129	1	63	2e-26	117	62
N.meningitidis_16S	SeqGr340638_1	1	98.48	66	1	0	59	124	1	66	2e-26	117	65
N.meningitidis_16S	SeqGr264425_1	1	98.48	66	1	0	71	136	1	66	2e-26	117	65
N.meningitidis_16S	SeqGr94821_1	1	100	63	0	0	70	132	1	63	2e-26	117	62
N.meningitidis_16S	SeqGr43416_4	4	100	63	0	0	66	128	1	63	2e-26	117	62
N.meningitidis_16S	SeqGr28761_1	1	100	63	0	0	66	128	1	63	2e-26	117	62
N.meningitidis_16S	SeqGr10988_1	1	95.83	72	3	0	1	72	30	101	2e-26	117	71
N.meningitidis_16S	SeqGr480532_1	1	98.48	66	0	1	140	205	12	76	6e-26	115	64
N.meningitidis_16S	SeqGr453773_1	1	98.48	66	0	1	140	205	9	73	6e-26	115	64
N.meningitidis_16S	SeqGr436884_1	1	98.48	66	0	1	140	205	1	65	6e-26	115	64
N.meningitidis_16S	SeqGr436254_1	1	98.48	66	0	1	140	205	5	69	6e-26	115	64
N.meningitidis_16S	SeqGr416335_1	1	100	62	0	0	66	127	1	62	6e-26	115	61
N.meningitidis_16S	SeqGr390085_1	1	98.48	66	0	1	140	205	23	87	6e-26	115	64
N.meningitidis_16S	SeqGr369755_1	1	98.48	66	0	1	140	205	1	65	6e-26	115	64
N.meningitidis_16S	SeqGr322953_1	1	98.48	66	0	1	140	205	23	87	6e-26	115	64
N.meningitidis_16S	SeqGr307665_1	1	100	62	0	0	43	104	1	62	6e-26	115	61
N.meningitidis_16S	SeqGr238559_1	1	100	62	0	0	67	128	1	62	6e-26	115	61
N.meningitidis_16S	SeqGr131022_1	1	98.48	66	0	1	140	205	21	85	6e-26	115	64
N.meningitidis_16S	SeqGr90212_1	1	98.46	65	1	0	72	136	1	65	6e-26	115	64
N.meningitidis_16S	SeqGr72212_1	1	98.48	66	0	1	140	205	1	65	6e-26	115	64
N.meningitidis_16S	SeqGr434306_1	1	100	61	0	0	66	126	1	61	2e-25	113	60
N.meningitidis_16S	SeqGr355846_2	2	100	61	0	0	66	126	1	61	2e-25	113	60
N.meningitidis_16S	SeqGr287510_1	1	94.52	73	4	0	66	138	1	73	2e-25	113	72
N.meningitidis_16S	SeqGr147925_1	1	97.01	67	2	0	66	132	1	67	2e-25	113	66
N.meningitidis_16S	SeqGr129174_1	1	98.46	65	0	1	141	205	1	64	2e-25	113	63
N.meningitidis_16S	SeqGr62851_1	1	95.71	70	3	0	1	70	32	101	2e-25	113	69
N.meningitidis_16S	SeqGr533321_1	1	98.44	64	0	1	142	205	1	63	8e-25	111	62
N.meningitidis_16S	SeqGr530820_1	1	98.44	64	0	1	142	205	1	63	8e-25	111	62
N.meningitidis_16S	SeqGr530619_1	1	98.44	64	0	1	142	205	1	63	8e-25	111	62
N.meningitidis_16S	SeqGr528754_1	1	98.44	64	0	1	142	205	1	63	8e-25	111	62
N.meningitidis_16S	SeqGr528506_1	1	95.65	69	3	0	1	69	33	101	8e-25	111	68
N.meningitidis_16S	SeqGr525773_1	1	98.44	64	0	1	142	205	1	63	8e-25	111	62
N.meningitidis_16S	SeqGr522120_1	1	98.44	64	0	1	142	205	1	63	8e-25	111	62
N.meningitidis_16S	SeqGr521912_1	1	98.44	64	0	1	142	205	1	63	8e-25	111	62
N.meningitidis_16S	SeqGr520802_1	1	98.44	64	0	1	142	205	1	63	8e-25	111	62
N.meningitidis_16S	SeqGr519972_2	2	98.44	64	0	1	142	205	1	63	8e-25	111	62
N.meningitidis_16S	SeqGr519039_1	1	98.44	64	0	1	142	205	1	63	8e-25	111	62
N.meningitidis_16S	SeqGr518981_1	1	98.44	64	0	1	142	205	1	63	8e-25	111	62
N.meningitidis_16S	SeqGr514686_1	1	98.44	64	0	1	142	205	1	63	8e-25	111	62
N.meningitidis_16S	SeqGr514431_1	1	98.44	64	0	1	142	205	1	63	8e-25	111	62
N.meningitidis_16S	SeqGr511874_1	1	98.44	64	0	1	142	205	1	63	8e-25	111	62
N.meningitidis_16S	SeqGr507972_1	1	98.44	64	0	1	142	205	1	63	8e-25	111	62
N.meningitidis_16S	SeqGr504911_1	1	98.44	64	0	1	142	205	1	63	8e-25	111	62
N.meningitidis_16S	SeqGr503865_1	1	98.44	64	0	1	142	205	1	63	8e-25	111	62
N.meningitidis_16S	SeqGr501527_1	1	98.44	64	0	1	142	205	1	63	8e-25	111	62
N.meningitidis_16S	SeqGr500040_1	1	98.44	64	0	1	142	205	1	63	8e-25	111	62
N.meningitidis_16S	SeqGr498692_1	1	98.44	64	0	1	142	205	1	63	8e-25	111	62
N.meningitidis_16S	SeqGr497202_1	1	98.44	64	0	1	142	205	1	63	8e-25	111	62
N.meningitidis_16S	SeqGr497143_1	1	98.44	64	0	1	142	205	2	64	8e-25	111	62
N.meningitidis_16S	SeqGr496302_1	1	98.44	64	0	1	142	205	1	63	8e-25	111	62
N.meningitidis_16S	SeqGr494009_1	1	98.44	64	0	1	142	205	1	63	8e-25	111	62
N.meningitidis_16S	SeqGr487414_1	1	98.44	64	0	1	142	205	1	63	8e-25	111	62
N.meningitidis_16S	SeqGr485240_1	1	98.44	64	0	1	142	205	1	63	8e-25	111	62
N.meningitidis_16S	SeqGr481992_1	1	98.44	64	0	1	142	205	1	63	8e-25	111	62
N.meningitidis_16S	SeqGr481199_1	1	98.44	64	0	1	142	205	1	63	8e-25	111	62
N.meningitidis_16S	SeqGr478043_1	1	98.44	64	0	1	142	205	1	63	8e-25	111	62
N.meningitidis_16S	SeqGr474233_1	1	98.44	64	0	1	142	205	1	63	8e-25	111	62
N.meningitidis_16S	SeqGr473340_1	1	98.44	64	0	1	142	205	1	63	8e-25	111	62
N.meningitidis_16S	SeqGr472211_1	1	100	60	0	0	63	122	1	60	8e-25	111	59
N.meningitidis_16S	SeqGr471995_1	1	98.44	64	0	1	142	205	1	63	8e-25	111	62
N.meningitidis_16S	SeqGr468590_1	1	100	60	0	0	46	105	1	60	8e-25	111	59
N.meningitidis_16S	SeqGr467873_1	1	98.44	64	0	1	142	205	1	63	8e-25	111	62
N.meningitidis_16S	SeqGr464014_1	1	98.44	64	0	1	142	205	1	63	8e-25	111	62
N.meningitidis_16S	SeqGr463419_1	1	98.44	64	0	1	142	205	1	63	8e-25	111	62
N.meningitidis_16S	SeqGr460309_1	1	98.44	64	0	1	142	205	1	63	8e-25	111	62
N.meningitidis_16S	SeqGr459382_1	1	98.44	64	0	1	142	205	1	63	8e-25	111	62
N.meningitidis_16S	SeqGr459304_1	1	98.44	64	0	1	142	205	1	63	8e-25	111	62
N.meningitidis_16S	SeqGr459300_1	1	98.44	64	0	1	142	205	1	63	8e-25	111	62
N.meningitidis_16S	SeqGr459060_1	1	98.44	64	0	1	142	205	1	63	8e-25	111	62
N.meningitidis_16S	SeqGr453925_1	1	98.44	64	0	1	142	205	1	63	8e-25	111	62
N.meningitidis_16S	SeqGr453521_1	1	98.44	64	0	1	142	205	1	63	8e-25	111	62
N.meningitidis_16S	SeqGr452588_1	1	98.44	64	0	1	142	205	1	63	8e-25	111	62
N.meningitidis_16S	SeqGr452049_1	1	98.44	64	0	1	142	205	1	63	8e-25	111	62
N.meningitidis_16S	SeqGr447598_3	3	98.44	64	0	1	142	205	1	63	8e-25	111	62
N.meningitidis_16S	SeqGr446741_1	1	98.44	64	0	1	142	205	1	63	8e-25	111	62
N.meningitidis_16S	SeqGr442904_1	1	98.44	64	0	1	142	205	1	63	8e-25	111	62
N.meningitidis_16S	SeqGr442725_1	1	98.44	64	0	1	142	205	1	63	8e-25	111	62
N.meningitidis_16S	SeqGr442197_1	1	98.44	64	0	1	142	205	1	63	8e-25	111	62
N.meningitidis_16S	SeqGr435081_1	1	98.44	64	0	1	142	205	1	63	8e-25	111	62
N.meningitidis_16S	SeqGr434668_1	1	98.44	64	0	1	142	205	1	63	8e-25	111	62
N.meningitidis_16S	SeqGr434486_1	1	98.44	64	0	1	142	205	1	63	8e-25	111	62
N.meningitidis_16S	SeqGr434025_1	1	98.44	64	0	1	142	205	1	63	8e-25	111	62
N.meningitidis_16S	SeqGr431614_1	1	98.44	64	0	1	142	205	1	63	8e-25	111	62
N.meningitidis_16S	SeqGr431149_1	1	98.44	64	0	1	142	205	1	63	8e-25	111	62
N.meningitidis_16S	SeqGr430302_1	1	98.44	64	0	1	142	205	1	63	8e-25	111	62
N.meningitidis_16S	SeqGr428735_1	1	98.44	64	0	1	142	205	1	63	8e-25	111	62
N.meningitidis_16S	SeqGr428135_1	1	98.44	64	0	1	142	205	1	63	8e-25	111	62
N.meningitidis_16S	SeqGr426819_1	1	98.44	64	0	1	142	205	1	63	8e-25	111	62
N.meningitidis_16S	SeqGr426488_1	1	98.44	64	0	1	142	205	1	63	8e-25	111	62
N.meningitidis_16S	SeqGr421822_1	1	98.44	64	0	1	142	205	1	63	8e-25	111	62
N.meningitidis_16S	SeqGr420134_1	1	98.44	64	0	1	142	205	1	63	8e-25	111	62
N.meningitidis_16S	SeqGr415135_1	1	98.44	64	0	1	142	205	1	63	8e-25	111	62
N.meningitidis_16S	SeqGr413204_1	1	98.44	64	0	1	142	205	1	63	8e-25	111	62
N.meningitidis_16S	SeqGr412828_1	1	98.44	64	0	1	142	205	1	63	8e-25	111	62
N.meningitidis_16S	SeqGr410227_1	1	98.44	64	0	1	142	205	1	63	8e-25	111	62
N.meningitidis_16S	SeqGr410216_1	1	98.44	64	0	1	142	205	1	63	8e-25	111	62
N.meningitidis_16S	SeqGr408503_1	1	98.44	64	0	1	142	205	1	63	8e-25	111	62
N.meningitidis_16S	SeqGr407295_1	1	98.44	64	0	1	142	205	1	63	8e-25	111	62
N.meningitidis_16S	SeqGr406856_1	1	98.44	64	0	1	142	205	1	63	8e-25	111	62
N.meningitidis_16S	SeqGr405087_1	1	98.44	64	0	1	142	205	1	63	8e-25	111	62
N.meningitidis_16S	SeqGr402158_1	1	98.44	64	0	1	142	205	1	63	8e-25	111	62
N.meningitidis_16S	SeqGr401310_1	1	98.44	64	0	1	142	205	1	63	8e-25	111	62
N.meningitidis_16S	SeqGr398080_1	1	98.44	64	0	1	142	205	1	63	8e-25	111	62
N.meningitidis_16S	SeqGr397679_1	1	98.44	64	0	1	142	205	1	63	8e-25	111	62
N.meningitidis_16S	SeqGr395880_1	1	98.44	64	0	1	142	205	1	63	8e-25	111	62
N.meningitidis_16S	SeqGr395088_1	1	98.44	64	0	1	142	205	1	63	8e-25	111	62
N.meningitidis_16S	SeqGr394536_1	1	98.44	64	0	1	142	205	1	63	8e-25	111	62
N.meningitidis_16S	SeqGr393164_1	1	98.44	64	0	1	142	205	1	63	8e-25	111	62
N.meningitidis_16S	SeqGr390831_1	1	98.44	64	0	1	142	205	1	63	8e-25	111	62
N.meningitidis_16S	SeqGr388507_2	2	98.44	64	0	1	142	205	1	63	8e-25	111	62
N.meningitidis_16S	SeqGr386107_1	1	98.44	64	0	1	142	205	1	63	8e-25	111	62
N.meningitidis_16S	SeqGr385289_1	1	98.44	64	0	1	142	205	1	63	8e-25	111	62
N.meningitidis_16S	SeqGr383862_1	1	98.44	64	0	1	142	205	1	63	8e-25	111	62
N.meningitidis_16S	SeqGr383362_1	1	98.44	64	0	1	142	205	1	63	8e-25	111	62
N.meningitidis_16S	SeqGr382668_1	1	98.44	64	0	1	142	205	1	63	8e-25	111	62
N.meningitidis_16S	SeqGr382605_1	1	98.44	64	0	1	142	205	1	63	8e-25	111	62
N.meningitidis_16S	SeqGr382032_1	1	98.44	64	0	1	142	205	1	63	8e-25	111	62
N.meningitidis_16S	SeqGr380335_1	1	98.44	64	0	1	142	205	1	63	8e-25	111	62
N.meningitidis_16S	SeqGr371005_1	1	98.44	64	0	1	142	205	1	63	8e-25	111	62
N.meningitidis_16S	SeqGr368988_1	1	98.44	64	0	1	142	205	1	63	8e-25	111	62
N.meningitidis_16S	SeqGr366422_1	1	98.44	64	0	1	142	205	1	63	8e-25	111	62
N.meningitidis_16S	SeqGr362833_1	1	98.44	64	0	1	142	205	1	63	8e-25	111	62
N.meningitidis_16S	SeqGr362489_1	1	98.44	64	0	1	142	205	1	63	8e-25	111	62
N.meningitidis_16S	SeqGr360328_1	1	98.44	64	0	1	142	205	1	63	8e-25	111	62
N.meningitidis_16S	SeqGr359088_1	1	98.44	64	0	1	142	205	1	63	8e-25	111	62
N.meningitidis_16S	SeqGr358813_1	1	98.44	64	0	1	142	205	1	63	8e-25	111	62
N.meningitidis_16S	SeqGr357226_2	2	98.44	64	0	1	142	205	1	63	8e-25	111	62
N.meningitidis_16S	SeqGr353633_1	1	100	60	0	0	66	125	1	60	8e-25	111	59
N.meningitidis_16S	SeqGr352717_1	1	98.44	64	0	1	142	205	1	63	8e-25	111	62
N.meningitidis_16S	SeqGr349086_1	1	98.44	64	0	1	142	205	1	63	8e-25	111	62
N.meningitidis_16S	SeqGr347632_1	1	98.44	64	0	1	142	205	1	63	8e-25	111	62
N.meningitidis_16S	SeqGr344050_1	1	98.44	64	0	1	142	205	1	63	8e-25	111	62
N.meningitidis_16S	SeqGr334392_2	2	98.44	64	0	1	142	205	1	63	8e-25	111	62
N.meningitidis_16S	SeqGr332739_1	1	98.44	64	0	1	142	205	1	63	8e-25	111	62
N.meningitidis_16S	SeqGr332431_2	2	98.44	64	0	1	142	205	1	63	8e-25	111	62
N.meningitidis_16S	SeqGr331910_1	1	98.44	64	0	1	142	205	1	63	8e-25	111	62
N.meningitidis_16S	SeqGr328488_1	1	98.44	64	0	1	142	205	1	63	8e-25	111	62
N.meningitidis_16S	SeqGr327604_1	1	98.44	64	0	1	142	205	1	63	8e-25	111	62
N.meningitidis_16S	SeqGr323972_1	1	98.44	64	0	1	142	205	1	63	8e-25	111	62
N.meningitidis_16S	SeqGr323319_1	1	98.44	64	0	1	142	205	1	63	8e-25	111	62
N.meningitidis_16S	SeqGr323262_1	1	98.44	64	0	1	142	205	1	63	8e-25	111	62
N.meningitidis_16S	SeqGr320540_1	1	98.44	64	0	1	142	205	1	63	8e-25	111	62
N.meningitidis_16S	SeqGr318397_1	1	98.44	64	0	1	142	205	1	63	8e-25	111	62
N.meningitidis_16S	SeqGr314920_1	1	98.44	64	0	1	142	205	1	63	8e-25	111	62
N.meningitidis_16S	SeqGr312308_1	1	98.44	64	0	1	142	205	1	63	8e-25	111	62
N.meningitidis_16S	SeqGr310882_1	1	98.44	64	0	1	142	205	1	63	8e-25	111	62
N.meningitidis_16S	SeqGr307761_1	1	98.44	64	0	1	142	205	1	63	8e-25	111	62
N.meningitidis_16S	SeqGr307734_1	1	98.44	64	0	1	142	205	1	63	8e-25	111	62
N.meningitidis_16S	SeqGr307696_1	1	98.44	64	0	1	142	205	1	63	8e-25	111	62
N.meningitidis_16S	SeqGr307429_1	1	98.44	64	0	1	142	205	1	63	8e-25	111	62
N.meningitidis_16S	SeqGr307334_1	1	98.44	64	0	1	142	205	1	63	8e-25	111	62
N.meningitidis_16S	SeqGr305843_1	1	98.44	64	0	1	142	205	1	63	8e-25	111	62
N.meningitidis_16S	SeqGr303899_1	1	98.44	64	0	1	142	205	1	63	8e-25	111	62
N.meningitidis_16S	SeqGr303613_1	1	98.44	64	0	1	142	205	1	63	8e-25	111	62
N.meningitidis_16S	SeqGr300142_1	1	98.44	64	0	1	142	205	1	63	8e-25	111	62
N.meningitidis_16S	SeqGr299222_1	1	98.44	64	0	1	142	205	1	63	8e-25	111	62
N.meningitidis_16S	SeqGr299140_2	2	98.44	64	0	1	142	205	1	63	8e-25	111	62
N.meningitidis_16S	SeqGr298948_1	1	98.44	64	0	1	142	205	1	63	8e-25	111	62
N.meningitidis_16S	SeqGr294927_1	1	98.44	64	0	1	142	205	1	63	8e-25	111	62
N.meningitidis_16S	SeqGr294459_1	1	98.44	64	0	1	142	205	1	63	8e-25	111	62
N.meningitidis_16S	SeqGr291793_1	1	98.44	64	0	1	142	205	1	63	8e-25	111	62
N.meningitidis_16S	SeqGr290930_1	1	98.44	64	0	1	142	205	1	63	8e-25	111	62
N.meningitidis_16S	SeqGr289345_1	1	98.44	64	0	1	142	205	1	63	8e-25	111	62
N.meningitidis_16S	SeqGr288679_1	1	98.44	64	0	1	142	205	1	63	8e-25	111	62
N.meningitidis_16S	SeqGr287461_1	1	98.44	64	0	1	142	205	1	63	8e-25	111	62
N.meningitidis_16S	SeqGr283058_1	1	98.44	64	0	1	142	205	1	63	8e-25	111	62
N.meningitidis_16S	SeqGr282213_1	1	98.44	64	0	1	142	205	1	63	8e-25	111	62
N.meningitidis_16S	SeqGr281066_1	1	98.44	64	0	1	142	205	1	63	8e-25	111	62
N.meningitidis_16S	SeqGr280182_1	1	98.44	64	0	1	142	205	1	63	8e-25	111	62
N.meningitidis_16S	SeqGr279087_1	1	98.44	64	0	1	142	205	1	63	8e-25	111	62
N.meningitidis_16S	SeqGr279004_1	1	98.44	64	0	1	142	205	1	63	8e-25	111	62
N.meningitidis_16S	SeqGr278720_1	1	98.44	64	0	1	142	205	1	63	8e-25	111	62
N.meningitidis_16S	SeqGr278425_1	1	98.44	64	0	1	142	205	1	63	8e-25	111	62
N.meningitidis_16S	SeqGr274355_1	1	98.44	64	0	1	142	205	1	63	8e-25	111	62
N.meningitidis_16S	SeqGr271015_1	1	98.44	64	0	1	142	205	1	63	8e-25	111	62
N.meningitidis_16S	SeqGr269926_1	1	98.44	64	0	1	142	205	1	63	8e-25	111	62
N.meningitidis_16S	SeqGr268573_1	1	98.44	64	0	1	142	205	1	63	8e-25	111	62
N.meningitidis_16S	SeqGr268482_1	1	98.44	64	0	1	142	205	1	63	8e-25	111	62
N.meningitidis_16S	SeqGr267141_1	1	98.44	64	0	1	142	205	1	63	8e-25	111	62
N.meningitidis_16S	SeqGr266010_1	1	98.44	64	0	1	142	205	1	63	8e-25	111	62
N.meningitidis_16S	SeqGr265568_1	1	98.44	64	0	1	142	205	1	63	8e-25	111	62
N.meningitidis_16S	SeqGr265536_1	1	98.44	64	0	1	142	205	1	63	8e-25	111	62
N.meningitidis_16S	SeqGr264327_1	1	98.44	64	0	1	142	205	1	63	8e-25	111	62
N.meningitidis_16S	SeqGr264160_3	3	98.44	64	0	1	142	205	1	63	8e-25	111	62
N.meningitidis_16S	SeqGr262564_1	1	98.44	64	0	1	142	205	1	63	8e-25	111	62
N.meningitidis_16S	SeqGr262497_1	1	98.44	64	0	1	142	205	1	63	8e-25	111	62
N.meningitidis_16S	SeqGr262475_1	1	100	60	0	0	50	109	1	60	8e-25	111	59
N.meningitidis_16S	SeqGr262459_1	1	98.44	64	0	1	142	205	1	63	8e-25	111	62
N.meningitidis_16S	SeqGr262101_1	1	98.44	64	0	1	142	205	1	63	8e-25	111	62
N.meningitidis_16S	SeqGr261462_1	1	98.44	64	0	1	142	205	1	63	8e-25	111	62
N.meningitidis_16S	SeqGr260146_1	1	98.44	64	0	1	142	205	1	63	8e-25	111	62
N.meningitidis_16S	SeqGr258777_1	1	98.44	64	0	1	142	205	1	63	8e-25	111	62
N.meningitidis_16S	SeqGr257020_1	1	98.44	64	0	1	142	205	1	63	8e-25	111	62
N.meningitidis_16S	SeqGr256348_1	1	98.44	64	0	1	142	205	1	63	8e-25	111	62
N.meningitidis_16S	SeqGr253774_1	1	98.44	64	0	1	142	205	1	63	8e-25	111	62
N.meningitidis_16S	SeqGr251882_3	3	98.44	64	0	1	142	205	1	63	8e-25	111	62
N.meningitidis_16S	SeqGr251493_1	1	98.44	64	0	1	142	205	1	63	8e-25	111	62
N.meningitidis_16S	SeqGr250004_1	1	98.44	64	0	1	142	205	1	63	8e-25	111	62
N.meningitidis_16S	SeqGr249838_1	1	98.44	64	0	1	142	205	1	63	8e-25	111	62
N.meningitidis_16S	SeqGr247940_1	1	98.44	64	0	1	142	205	1	63	8e-25	111	62
N.meningitidis_16S	SeqGr247557_1	1	98.44	64	0	1	142	205	1	63	8e-25	111	62
N.meningitidis_16S	SeqGr247179_1	1	98.44	64	0	1	142	205	1	63	8e-25	111	62
N.meningitidis_16S	SeqGr246191_1	1	98.44	64	0	1	142	205	1	63	8e-25	111	62
N.meningitidis_16S	SeqGr245874_1	1	98.44	64	0	1	142	205	1	63	8e-25	111	62
N.meningitidis_16S	SeqGr243646_1	1	98.44	64	0	1	142	205	1	63	8e-25	111	62
N.meningitidis_16S	SeqGr239972_1	1	98.44	64	0	1	142	205	1	63	8e-25	111	62
N.meningitidis_16S	SeqGr238220_2	2	98.44	64	0	1	142	205	1	63	8e-25	111	62
N.meningitidis_16S	SeqGr237456_1	1	98.44	64	0	1	142	205	1	63	8e-25	111	62
N.meningitidis_16S	SeqGr235710_1	1	98.44	64	0	1	142	205	1	63	8e-25	111	62
N.meningitidis_16S	SeqGr235161_1	1	98.44	64	0	1	142	205	1	63	8e-25	111	62
N.meningitidis_16S	SeqGr235078_1	1	98.44	64	0	1	142	205	1	63	8e-25	111	62
N.meningitidis_16S	SeqGr233460_1	1	98.44	64	0	1	142	205	1	63	8e-25	111	62
N.meningitidis_16S	SeqGr231885_1	1	98.44	64	0	1	142	205	1	63	8e-25	111	62
N.meningitidis_16S	SeqGr230744_1	1	98.44	64	0	1	142	205	1	63	8e-25	111	62
N.meningitidis_16S	SeqGr229743_1	1	98.44	64	0	1	142	205	1	63	8e-25	111	62
N.meningitidis_16S	SeqGr227615_1	1	98.44	64	0	1	142	205	1	63	8e-25	111	62
N.meningitidis_16S	SeqGr226539_2	2	98.44	64	0	1	142	205	1	63	8e-25	111	62
N.meningitidis_16S	SeqGr225921_2	2	98.44	64	0	1	142	205	1	63	8e-25	111	62
N.meningitidis_16S	SeqGr225790_1	1	98.44	64	0	1	142	205	1	63	8e-25	111	62
N.meningitidis_16S	SeqGr225580_1	1	98.44	64	0	1	142	205	1	63	8e-25	111	62
N.meningitidis_16S	SeqGr225070_1	1	98.44	64	0	1	142	205	1	63	8e-25	111	62
N.meningitidis_16S	SeqGr224938_1	1	98.44	64	0	1	142	205	1	63	8e-25	111	62
N.meningitidis_16S	SeqGr224770_1	1	98.44	64	0	1	142	205	1	63	8e-25	111	62
N.meningitidis_16S	SeqGr224627_1	1	98.44	64	0	1	142	205	1	63	8e-25	111	62
N.meningitidis_16S	SeqGr223913_3	3	98.44	64	0	1	142	205	1	63	8e-25	111	62
N.meningitidis_16S	SeqGr223409_1	1	98.44	64	0	1	142	205	1	63	8e-25	111	62
N.meningitidis_16S	SeqGr221329_1	1	98.44	64	0	1	142	205	1	63	8e-25	111	62
N.meningitidis_16S	SeqGr221260_1	1	98.44	64	0	1	142	205	1	63	8e-25	111	62
N.meningitidis_16S	SeqGr220237_1	1	98.44	64	0	1	142	205	1	63	8e-25	111	62
N.meningitidis_16S	SeqGr220004_1	1	98.44	64	0	1	142	205	1	63	8e-25	111	62
N.meningitidis_16S	SeqGr219480_1	1	98.44	64	0	1	142	205	1	63	8e-25	111	62
N.meningitidis_16S	SeqGr219058_1	1	98.44	64	0	1	142	205	1	63	8e-25	111	62
N.meningitidis_16S	SeqGr215709_1	1	98.44	64	0	1	142	205	1	63	8e-25	111	62
N.meningitidis_16S	SeqGr215023_1	1	98.44	64	0	1	142	205	1	63	8e-25	111	62
N.meningitidis_16S	SeqGr214435_1	1	98.44	64	0	1	142	205	1	63	8e-25	111	62
N.meningitidis_16S	SeqGr214261_1	1	98.44	64	0	1	142	205	1	63	8e-25	111	62
N.meningitidis_16S	SeqGr214196_1	1	98.44	64	0	1	142	205	1	63	8e-25	111	62
N.meningitidis_16S	SeqGr213707_1	1	98.44	64	0	1	142	205	1	63	8e-25	111	62
N.meningitidis_16S	SeqGr213242_1	1	98.44	64	0	1	142	205	1	63	8e-25	111	62
N.meningitidis_16S	SeqGr209808_1	1	98.44	64	0	1	142	205	1	63	8e-25	111	62
N.meningitidis_16S	SeqGr209107_1	1	98.44	64	0	1	142	205	1	63	8e-25	111	62
N.meningitidis_16S	SeqGr207309_3	3	98.44	64	0	1	142	205	1	63	8e-25	111	62
N.meningitidis_16S	SeqGr204513_1	1	98.44	64	0	1	142	205	1	63	8e-25	111	62
N.meningitidis_16S	SeqGr204511_3	3	98.44	64	0	1	142	205	1	63	8e-25	111	62
N.meningitidis_16S	SeqGr204116_1	1	98.44	64	0	1	142	205	1	63	8e-25	111	62
N.meningitidis_16S	SeqGr203986_1	1	98.44	64	0	1	142	205	1	63	8e-25	111	62
N.meningitidis_16S	SeqGr201578_1	1	98.44	64	0	1	142	205	1	63	8e-25	111	62
N.meningitidis_16S	SeqGr201561_1	1	98.44	64	0	1	142	205	1	63	8e-25	111	62
N.meningitidis_16S	SeqGr201482_1	1	98.44	64	0	1	142	205	1	63	8e-25	111	62
N.meningitidis_16S	SeqGr200804_1	1	98.44	64	0	1	142	205	1	63	8e-25	111	62
N.meningitidis_16S	SeqGr198995_1	1	98.44	64	0	1	142	205	1	63	8e-25	111	62
N.meningitidis_16S	SeqGr196937_1	1	98.44	64	0	1	142	205	1	63	8e-25	111	62
N.meningitidis_16S	SeqGr196753_1	1	98.44	64	0	1	142	205	1	63	8e-25	111	62
N.meningitidis_16S	SeqGr196528_1	1	98.44	64	0	1	142	205	1	63	8e-25	111	62
N.meningitidis_16S	SeqGr196088_2	2	98.44	64	0	1	142	205	1	63	8e-25	111	62
N.meningitidis_16S	SeqGr194305_1	1	98.44	64	0	1	142	205	1	63	8e-25	111	62
N.meningitidis_16S	SeqGr193995_1	1	98.44	64	0	1	142	205	1	63	8e-25	111	62
N.meningitidis_16S	SeqGr191948_1	1	98.44	64	0	1	142	205	1	63	8e-25	111	62
N.meningitidis_16S	SeqGr191808_1	1	100	60	0	0	50	109	1	60	8e-25	111	59
N.meningitidis_16S	SeqGr191313_1	1	98.44	64	0	1	142	205	1	63	8e-25	111	62
N.meningitidis_16S	SeqGr189671_1	1	98.44	64	0	1	142	205	1	63	8e-25	111	62
N.meningitidis_16S	SeqGr188367_1	1	98.44	64	0	1	142	205	1	63	8e-25	111	62
N.meningitidis_16S	SeqGr188196_1	1	98.44	64	0	1	142	205	1	63	8e-25	111	62
N.meningitidis_16S	SeqGr188129_1	1	98.44	64	0	1	142	205	1	63	8e-25	111	62
N.meningitidis_16S	SeqGr187881_1	1	98.44	64	0	1	142	205	1	63	8e-25	111	62
N.meningitidis_16S	SeqGr185792_1	1	98.44	64	0	1	142	205	1	63	8e-25	111	62
N.meningitidis_16S	SeqGr185411_1	1	98.44	64	0	1	142	205	1	63	8e-25	111	62
N.meningitidis_16S	SeqGr183987_1	1	98.44	64	0	1	142	205	1	63	8e-25	111	62
N.meningitidis_16S	SeqGr183225_1	1	98.44	64	0	1	142	205	1	63	8e-25	111	62
N.meningitidis_16S	SeqGr182781_1	1	98.44	64	0	1	142	205	1	63	8e-25	111	62
N.meningitidis_16S	SeqGr181405_1	1	98.44	64	0	1	142	205	1	63	8e-25	111	62
N.meningitidis_16S	SeqGr180523_1	1	98.44	64	0	1	142	205	1	63	8e-25	111	62
N.meningitidis_16S	SeqGr180494_2	2	98.44	64	0	1	142	205	1	63	8e-25	111	62
N.meningitidis_16S	SeqGr178666_1	1	98.44	64	0	1	142	205	1	63	8e-25	111	62
N.meningitidis_16S	SeqGr177786_1	1	98.44	64	0	1	142	205	1	63	8e-25	111	62
N.meningitidis_16S	SeqGr176397_1	1	98.44	64	0	1	142	205	1	63	8e-25	111	62
N.meningitidis_16S	SeqGr173474_1	1	98.44	64	0	1	142	205	1	63	8e-25	111	62
N.meningitidis_16S	SeqGr173373_1	1	98.44	64	0	1	142	205	1	63	8e-25	111	62
N.meningitidis_16S	SeqGr172432_1	1	98.44	64	0	1	142	205	1	63	8e-25	111	62
N.meningitidis_16S	SeqGr170913_1	1	98.44	64	0	1	142	205	1	63	8e-25	111	62
N.meningitidis_16S	SeqGr168535_1	1	98.44	64	0	1	142	205	1	63	8e-25	111	62
N.meningitidis_16S	SeqGr168488_1	1	98.44	64	0	1	142	205	1	63	8e-25	111	62
N.meningitidis_16S	SeqGr165685_1	1	98.44	64	0	1	142	205	1	63	8e-25	111	62
N.meningitidis_16S	SeqGr165681_1	1	98.44	64	0	1	142	205	1	63	8e-25	111	62
N.meningitidis_16S	SeqGr164631_1	1	98.44	64	0	1	142	205	1	63	8e-25	111	62
N.meningitidis_16S	SeqGr163957_1	1	98.44	64	0	1	142	205	1	63	8e-25	111	62
N.meningitidis_16S	SeqGr163519_1	1	98.44	64	0	1	142	205	1	63	8e-25	111	62
N.meningitidis_16S	SeqGr162741_1	1	98.44	64	0	1	142	205	1	63	8e-25	111	62
N.meningitidis_16S	SeqGr162508_1	1	98.44	64	0	1	142	205	1	63	8e-25	111	62
N.meningitidis_16S	SeqGr162434_1	1	98.44	64	0	1	142	205	1	63	8e-25	111	62
N.meningitidis_16S	SeqGr159412_1	1	98.44	64	0	1	142	205	1	63	8e-25	111	62
N.meningitidis_16S	SeqGr159358_1	1	98.44	64	0	1	142	205	1	63	8e-25	111	62
N.meningitidis_16S	SeqGr158166_1	1	98.44	64	0	1	142	205	1	63	8e-25	111	62
N.meningitidis_16S	SeqGr157943_1	1	98.44	64	0	1	142	205	1	63	8e-25	111	62
N.meningitidis_16S	SeqGr157748_1	1	98.44	64	0	1	142	205	3	65	8e-25	111	62
N.meningitidis_16S	SeqGr157308_1	1	98.44	64	0	1	142	205	1	63	8e-25	111	62
N.meningitidis_16S	SeqGr157095_12	12	98.44	64	0	1	142	205	1	63	8e-25	111	62
N.meningitidis_16S	SeqGr156456_2	2	98.44	64	0	1	142	205	1	63	8e-25	111	62
N.meningitidis_16S	SeqGr156416_2	2	98.44	64	0	1	142	205	1	63	8e-25	111	62
N.meningitidis_16S	SeqGr155684_3	3	98.44	64	0	1	142	205	1	63	8e-25	111	62
N.meningitidis_16S	SeqGr155112_1	1	98.44	64	0	1	142	205	1	63	8e-25	111	62
N.meningitidis_16S	SeqGr153134_1	1	98.44	64	0	1	142	205	1	63	8e-25	111	62
N.meningitidis_16S	SeqGr151391_1	1	98.44	64	0	1	142	205	1	63	8e-25	111	62
N.meningitidis_16S	SeqGr151112_3	3	98.44	64	0	1	142	205	1	63	8e-25	111	62
N.meningitidis_16S	SeqGr149853_1	1	98.44	64	0	1	142	205	1	63	8e-25	111	62
N.meningitidis_16S	SeqGr149586_1	1	98.44	64	0	1	142	205	1	63	8e-25	111	62
N.meningitidis_16S	SeqGr148111_2	2	98.44	64	0	1	142	205	1	63	8e-25	111	62
N.meningitidis_16S	SeqGr147889_1	1	98.44	64	0	1	142	205	1	63	8e-25	111	62
N.meningitidis_16S	SeqGr146059_1	1	98.44	64	0	1	142	205	1	63	8e-25	111	62
N.meningitidis_16S	SeqGr145971_1	1	98.44	64	0	1	142	205	1	63	8e-25	111	62
N.meningitidis_16S	SeqGr145167_1	1	98.44	64	0	1	142	205	1	63	8e-25	111	62
N.meningitidis_16S	SeqGr143675_1	1	98.44	64	0	1	142	205	1	63	8e-25	111	62
N.meningitidis_16S	SeqGr143503_1	1	98.44	64	0	1	142	205	1	63	8e-25	111	62
N.meningitidis_16S	SeqGr143003_1	1	98.44	64	0	1	142	205	1	63	8e-25	111	62
N.meningitidis_16S	SeqGr142588_1	1	98.44	64	0	1	142	205	1	63	8e-25	111	62
N.meningitidis_16S	SeqGr142232_1	1	98.44	64	0	1	142	205	1	63	8e-25	111	62
N.meningitidis_16S	SeqGr141827_1	1	98.44	64	0	1	142	205	1	63	8e-25	111	62
N.meningitidis_16S	SeqGr139371_1	1	98.44	64	0	1	142	205	1	63	8e-25	111	62
N.meningitidis_16S	SeqGr136664_1	1	98.44	64	0	1	142	205	1	63	8e-25	111	62
N.meningitidis_16S	SeqGr136500_1	1	98.44	64	0	1	142	205	1	63	8e-25	111	62
N.meningitidis_16S	SeqGr136469_7	7	98.44	64	0	1	142	205	1	63	8e-25	111	62
N.meningitidis_16S	SeqGr136276_8	8	98.44	64	0	1	142	205	1	63	8e-25	111	62
N.meningitidis_16S	SeqGr134776_1	1	98.44	64	0	1	142	205	1	63	8e-25	111	62
N.meningitidis_16S	SeqGr131526_1	1	98.44	64	0	1	142	205	1	63	8e-25	111	62
N.meningitidis_16S	SeqGr130837_1	1	95.65	69	3	0	1	69	33	101	8e-25	111	68
N.meningitidis_16S	SeqGr130049_1	1	98.44	64	0	1	142	205	1	63	8e-25	111	62
N.meningitidis_16S	SeqGr128375_1	1	98.44	64	0	1	142	205	1	63	8e-25	111	62
N.meningitidis_16S	SeqGr127231_1	1	98.44	64	0	1	142	205	1	63	8e-25	111	62
N.meningitidis_16S	SeqGr124401_1	1	98.44	64	0	1	142	205	1	63	8e-25	111	62
N.meningitidis_16S	SeqGr123651_1	1	98.44	64	0	1	142	205	1	63	8e-25	111	62
N.meningitidis_16S	SeqGr123639_1	1	98.44	64	0	1	142	205	1	63	8e-25	111	62
N.meningitidis_16S	SeqGr123625_3	3	98.44	64	0	1	142	205	1	63	8e-25	111	62
N.meningitidis_16S	SeqGr123030_1	1	98.44	64	0	1	142	205	1	63	8e-25	111	62
N.meningitidis_16S	SeqGr122961_1	1	98.44	64	0	1	142	205	1	63	8e-25	111	62
N.meningitidis_16S	SeqGr122773_1	1	98.44	64	0	1	142	205	1	63	8e-25	111	62
N.meningitidis_16S	SeqGr121440_1	1	98.44	64	0	1	142	205	1	63	8e-25	111	62
N.meningitidis_16S	SeqGr121309_1	1	98.44	64	0	1	142	205	1	63	8e-25	111	62
N.meningitidis_16S	SeqGr120876_1	1	98.44	64	0	1	142	205	1	63	8e-25	111	62
N.meningitidis_16S	SeqGr120794_1	1	98.44	64	0	1	142	205	1	63	8e-25	111	62
N.meningitidis_16S	SeqGr120025_2	2	98.44	64	0	1	142	205	1	63	8e-25	111	62
N.meningitidis_16S	SeqGr119969_1	1	98.44	64	0	1	142	205	1	63	8e-25	111	62
N.meningitidis_16S	SeqGr119722_1	1	98.44	64	0	1	142	205	1	63	8e-25	111	62
N.meningitidis_16S	SeqGr118971_1	1	98.44	64	0	1	142	205	1	63	8e-25	111	62
N.meningitidis_16S	SeqGr117905_1	1	98.44	64	0	1	142	205	1	63	8e-25	111	62
N.meningitidis_16S	SeqGr117762_1	1	98.44	64	0	1	142	205	1	63	8e-25	111	62
N.meningitidis_16S	SeqGr116919_1	1	98.44	64	0	1	142	205	1	63	8e-25	111	62
N.meningitidis_16S	SeqGr116424_1	1	98.44	64	0	1	142	205	1	63	8e-25	111	62
N.meningitidis_16S	SeqGr115682_1	1	98.44	64	0	1	142	205	1	63	8e-25	111	62
N.meningitidis_16S	SeqGr114444_1	1	98.44	64	0	1	142	205	1	63	8e-25	111	62
N.meningitidis_16S	SeqGr113311_1	1	98.44	64	0	1	142	205	1	63	8e-25	111	62
N.meningitidis_16S	SeqGr112466_1	1	98.44	64	0	1	142	205	1	63	8e-25	111	62
N.meningitidis_16S	SeqGr112088_15	15	98.44	64	0	1	142	205	1	63	8e-25	111	62
N.meningitidis_16S	SeqGr111902_1	1	98.44	64	0	1	142	205	1	63	8e-25	111	62
N.meningitidis_16S	SeqGr111663_1	1	98.44	64	0	1	142	205	1	63	8e-25	111	62
N.meningitidis_16S	SeqGr111275_1	1	98.44	64	0	1	142	205	1	63	8e-25	111	62
N.meningitidis_16S	SeqGr109831_4	4	98.44	64	0	1	142	205	1	63	8e-25	111	62
N.meningitidis_16S	SeqGr107988_1	1	98.44	64	0	1	142	205	1	63	8e-25	111	62
N.meningitidis_16S	SeqGr107710_1	1	98.44	64	0	1	142	205	1	63	8e-25	111	62
N.meningitidis_16S	SeqGr106245_1	1	98.44	64	0	1	142	205	1	63	8e-25	111	62
N.meningitidis_16S	SeqGr103033_1	1	98.44	64	0	1	142	205	1	63	8e-25	111	62
N.meningitidis_16S	SeqGr102641_1	1	98.44	64	0	1	142	205	1	63	8e-25	111	62
N.meningitidis_16S	SeqGr102303_1	1	98.44	64	0	1	142	205	1	63	8e-25	111	62
N.meningitidis_16S	SeqGr101703_1	1	98.44	64	0	1	142	205	4	66	8e-25	111	62
N.meningitidis_16S	SeqGr101180_1	1	98.44	64	0	1	142	205	1	63	8e-25	111	62
N.meningitidis_16S	SeqGr100665_1	1	98.44	64	0	1	142	205	1	63	8e-25	111	62
N.meningitidis_16S	SeqGr99203_1	1	98.44	64	0	1	142	205	1	63	8e-25	111	62
N.meningitidis_16S	SeqGr97954_1	1	98.44	64	0	1	142	205	1	63	8e-25	111	62
N.meningitidis_16S	SeqGr93348_1	1	98.44	64	0	1	142	205	1	63	8e-25	111	62
N.meningitidis_16S	SeqGr91712_1	1	98.44	64	0	1	142	205	1	63	8e-25	111	62
N.meningitidis_16S	SeqGr89615_5	5	98.44	64	0	1	142	205	1	63	8e-25	111	62
N.meningitidis_16S	SeqGr89488_1	1	98.44	64	0	1	142	205	1	63	8e-25	111	62
N.meningitidis_16S	SeqGr88850_1	1	98.44	64	0	1	142	205	1	63	8e-25	111	62
N.meningitidis_16S	SeqGr88499_1	1	98.44	64	0	1	142	205	1	63	8e-25	111	62
N.meningitidis_16S	SeqGr86334_2	2	98.44	64	0	1	142	205	1	63	8e-25	111	62
N.meningitidis_16S	SeqGr86270_1	1	98.44	64	0	1	142	205	2	64	8e-25	111	62
N.meningitidis_16S	SeqGr85126_1	1	98.44	64	0	1	142	205	1	63	8e-25	111	62
N.meningitidis_16S	SeqGr84144_3	3	98.44	64	0	1	142	205	1	63	8e-25	111	62
N.meningitidis_16S	SeqGr83801_1	1	98.44	64	0	1	142	205	1	63	8e-25	111	62
N.meningitidis_16S	SeqGr83605_2	2	98.44	64	0	1	142	205	1	63	8e-25	111	62
N.meningitidis_16S	SeqGr79721_7	7	98.44	64	0	1	142	205	1	63	8e-25	111	62
N.meningitidis_16S	SeqGr79482_9	9	98.44	64	0	1	142	205	1	63	8e-25	111	62
N.meningitidis_16S	SeqGr78849_1	1	98.44	64	0	1	142	205	1	63	8e-25	111	62
N.meningitidis_16S	SeqGr78357_5	5	98.44	64	0	1	142	205	1	63	8e-25	111	62
N.meningitidis_16S	SeqGr77210_1	1	98.44	64	0	1	142	205	1	63	8e-25	111	62
N.meningitidis_16S	SeqGr76160_1	1	98.44	64	0	1	142	205	1	63	8e-25	111	62
N.meningitidis_16S	SeqGr75701_1	1	98.44	64	0	1	142	205	1	63	8e-25	111	62
N.meningitidis_16S	SeqGr75010_1	1	98.44	64	0	1	142	205	1	63	8e-25	111	62
N.meningitidis_16S	SeqGr73837_1	1	98.44	64	0	1	142	205	1	63	8e-25	111	62
N.meningitidis_16S	SeqGr71729_1	1	98.44	64	0	1	142	205	1	63	8e-25	111	62
N.meningitidis_16S	SeqGr71623_1	1	98.44	64	0	1	142	205	1	63	8e-25	111	62
N.meningitidis_16S	SeqGr71340_6	6	98.44	64	0	1	142	205	1	63	8e-25	111	62
N.meningitidis_16S	SeqGr70854_1	1	100	60	0	0	69	128	1	60	8e-25	111	59
N.meningitidis_16S	SeqGr70201_1	1	98.44	64	0	1	142	205	1	63	8e-25	111	62
N.meningitidis_16S	SeqGr69686_3	3	98.44	64	0	1	142	205	1	63	8e-25	111	62
N.meningitidis_16S	SeqGr67336_1	1	98.44	64	0	1	142	205	1	63	8e-25	111	62
N.meningitidis_16S	SeqGr67158_1	1	98.44	64	0	1	142	205	1	63	8e-25	111	62
N.meningitidis_16S	SeqGr67046_1	1	98.44	64	0	1	142	205	1	63	8e-25	111	62
N.meningitidis_16S	SeqGr65310_1	1	98.44	64	0	1	142	205	1	63	8e-25	111	62
N.meningitidis_16S	SeqGr65119_1	1	98.44	64	0	1	142	205	1	63	8e-25	111	62
N.meningitidis_16S	SeqGr64304_1	1	98.44	64	0	1	142	205	1	63	8e-25	111	62
N.meningitidis_16S	SeqGr64211_1	1	98.44	64	0	1	142	205	1	63	8e-25	111	62
N.meningitidis_16S	SeqGr63662_1	1	98.44	64	0	1	142	205	1	63	8e-25	111	62
N.meningitidis_16S	SeqGr63271_1	1	98.44	64	0	1	142	205	1	63	8e-25	111	62
N.meningitidis_16S	SeqGr61427_1	1	98.44	64	0	1	142	205	1	63	8e-25	111	62
N.meningitidis_16S	SeqGr60955_1	1	98.44	64	0	1	142	205	1	63	8e-25	111	62
N.meningitidis_16S	SeqGr59331_1	1	98.44	64	0	1	142	205	1	63	8e-25	111	62
N.meningitidis_16S	SeqGr59301_1	1	98.44	64	0	1	142	205	1	63	8e-25	111	62
N.meningitidis_16S	SeqGr58586_12	12	98.44	64	0	1	142	205	1	63	8e-25	111	62
N.meningitidis_16S	SeqGr57650_1	1	98.44	64	0	1	142	205	1	63	8e-25	111	62
N.meningitidis_16S	SeqGr57558_1	1	98.44	64	0	1	142	205	1	63	8e-25	111	62
N.meningitidis_16S	SeqGr56859_20	20	98.44	64	0	1	142	205	1	63	8e-25	111	62
N.meningitidis_16S	SeqGr56107_1	1	98.44	64	0	1	142	205	1	63	8e-25	111	62
N.meningitidis_16S	SeqGr55623_1	1	98.44	64	0	1	142	205	1	63	8e-25	111	62
N.meningitidis_16S	SeqGr55430_3	3	98.44	64	0	1	142	205	1	63	8e-25	111	62
N.meningitidis_16S	SeqGr55122_1	1	98.44	64	0	1	142	205	1	63	8e-25	111	62
N.meningitidis_16S	SeqGr54517_7	7	98.44	64	0	1	142	205	1	63	8e-25	111	62
N.meningitidis_16S	SeqGr54214_1	1	98.44	64	0	1	142	205	1	63	8e-25	111	62
N.meningitidis_16S	SeqGr53626_1	1	98.44	64	0	1	142	205	1	63	8e-25	111	62
N.meningitidis_16S	SeqGr51670_1	1	98.44	64	0	1	142	205	1	63	8e-25	111	62
N.meningitidis_16S	SeqGr49394_1	1	98.44	64	0	1	142	205	1	63	8e-25	111	62
N.meningitidis_16S	SeqGr48995_2	2	98.44	64	0	1	142	205	1	63	8e-25	111	62
N.meningitidis_16S	SeqGr47602_2	2	98.44	64	0	1	142	205	1	63	8e-25	111	62
N.meningitidis_16S	SeqGr47051_1	1	98.44	64	0	1	142	205	1	63	8e-25	111	62
N.meningitidis_16S	SeqGr46844_1	1	98.44	64	0	1	142	205	1	63	8e-25	111	62
N.meningitidis_16S	SeqGr46303_1	1	98.44	64	0	1	142	205	1	63	8e-25	111	62
N.meningitidis_16S	SeqGr46159_1	1	98.44	64	0	1	142	205	1	63	8e-25	111	62
N.meningitidis_16S	SeqGr45265_1	1	98.44	64	0	1	142	205	1	63	8e-25	111	62
N.meningitidis_16S	SeqGr45007_1	1	98.44	64	0	1	142	205	1	63	8e-25	111	62
N.meningitidis_16S	SeqGr44703_1	1	98.44	64	0	1	142	205	1	63	8e-25	111	62
N.meningitidis_16S	SeqGr44527_1	1	98.44	64	0	1	142	205	1	63	8e-25	111	62
N.meningitidis_16S	SeqGr43935_6	6	98.44	64	0	1	142	205	1	63	8e-25	111	62
N.meningitidis_16S	SeqGr43040_1	1	98.44	64	0	1	142	205	1	63	8e-25	111	62
N.meningitidis_16S	SeqGr42067_1	1	98.44	64	0	1	142	205	1	63	8e-25	111	62
N.meningitidis_16S	SeqGr41700_1	1	98.44	64	0	1	142	205	1	63	8e-25	111	62
N.meningitidis_16S	SeqGr41644_1	1	98.44	64	0	1	142	205	1	63	8e-25	111	62
N.meningitidis_16S	SeqGr41473_1	1	98.44	64	0	1	142	205	1	63	8e-25	111	62
N.meningitidis_16S	SeqGr41376_1	1	98.44	64	0	1	142	205	1	63	8e-25	111	62
N.meningitidis_16S	SeqGr40691_1	1	98.44	64	0	1	142	205	1	63	8e-25	111	62
N.meningitidis_16S	SeqGr40422_1	1	98.44	64	0	1	142	205	1	63	8e-25	111	62
N.meningitidis_16S	SeqGr40407_1	1	98.44	64	0	1	142	205	1	63	8e-25	111	62
N.meningitidis_16S	SeqGr39058_1	1	98.44	64	0	1	142	205	1	63	8e-25	111	62
N.meningitidis_16S	SeqGr38604_1	1	98.44	64	0	1	142	205	1	63	8e-25	111	62
N.meningitidis_16S	SeqGr38172_1	1	98.44	64	0	1	142	205	1	63	8e-25	111	62
N.meningitidis_16S	SeqGr36730_1	1	98.44	64	0	1	142	205	1	63	8e-25	111	62
N.meningitidis_16S	SeqGr36564_1	1	100	60	0	0	82	141	1	60	8e-25	111	59
N.meningitidis_16S	SeqGr36446_1	1	98.44	64	0	1	142	205	1	63	8e-25	111	62
N.meningitidis_16S	SeqGr36419_1	1	98.44	64	0	1	142	205	1	63	8e-25	111	62
N.meningitidis_16S	SeqGr36353_1	1	98.44	64	0	1	142	205	1	63	8e-25	111	62
N.meningitidis_16S	SeqGr36137_1	1	98.44	64	0	1	142	205	1	63	8e-25	111	62
N.meningitidis_16S	SeqGr36067_2	2	98.44	64	0	1	142	205	1	63	8e-25	111	62
N.meningitidis_16S	SeqGr35671_1	1	98.44	64	0	1	142	205	1	63	8e-25	111	62
N.meningitidis_16S	SeqGr34865_1	1	98.44	64	0	1	142	205	1	63	8e-25	111	62
N.meningitidis_16S	SeqGr33625_1	1	98.44	64	0	1	142	205	1	63	8e-25	111	62
N.meningitidis_16S	SeqGr33415_1	1	98.44	64	0	1	142	205	1	63	8e-25	111	62
N.meningitidis_16S	SeqGr32681_1	1	98.44	64	0	1	142	205	1	63	8e-25	111	62
N.meningitidis_16S	SeqGr32504_1	1	98.44	64	0	1	142	205	1	63	8e-25	111	62
N.meningitidis_16S	SeqGr31873_1	1	98.44	64	0	1	142	205	1	63	8e-25	111	62
N.meningitidis_16S	SeqGr31205_1	1	98.44	64	0	1	142	205	1	63	8e-25	111	62
N.meningitidis_16S	SeqGr30748_1	1	98.44	64	0	1	142	205	1	63	8e-25	111	62
N.meningitidis_16S	SeqGr30617_1	1	98.44	64	0	1	142	205	1	63	8e-25	111	62
N.meningitidis_16S	SeqGr30557_2	2	98.44	64	0	1	142	205	1	63	8e-25	111	62
N.meningitidis_16S	SeqGr30534_1	1	98.44	64	0	1	142	205	1	63	8e-25	111	62
N.meningitidis_16S	SeqGr30263_1	1	98.44	64	0	1	142	205	1	63	8e-25	111	62
N.meningitidis_16S	SeqGr30079_12	12	98.44	64	0	1	142	205	1	63	8e-25	111	62
N.meningitidis_16S	SeqGr29335_1	1	98.44	64	0	1	142	205	1	63	8e-25	111	62
N.meningitidis_16S	SeqGr28236_2	2	98.44	64	0	1	142	205	1	63	8e-25	111	62
N.meningitidis_16S	SeqGr26866_3	3	98.44	64	0	1	142	205	1	63	8e-25	111	62
N.meningitidis_16S	SeqGr26291_1	1	98.44	64	0	1	142	205	1	63	8e-25	111	62
N.meningitidis_16S	SeqGr26279_1	1	98.44	64	0	1	142	205	1	63	8e-25	111	62
N.meningitidis_16S	SeqGr25418_1	1	98.44	64	0	1	142	205	1	63	8e-25	111	62
N.meningitidis_16S	SeqGr25409_1	1	98.44	64	0	1	142	205	1	63	8e-25	111	62
N.meningitidis_16S	SeqGr25019_1	1	98.44	64	0	1	142	205	1	63	8e-25	111	62
N.meningitidis_16S	SeqGr24900_2	2	98.44	64	0	1	142	205	1	63	8e-25	111	62
N.meningitidis_16S	SeqGr24689_1	1	98.44	64	0	1	142	205	1	63	8e-25	111	62
N.meningitidis_16S	SeqGr24481_1	1	98.44	64	0	1	142	205	1	63	8e-25	111	62
N.meningitidis_16S	SeqGr24142_1	1	94.44	72	4	0	69	140	1	72	8e-25	111	71
N.meningitidis_16S	SeqGr24123_1	1	98.44	64	0	1	142	205	1	63	8e-25	111	62
N.meningitidis_16S	SeqGr23981_1	1	98.44	64	0	1	142	205	1	63	8e-25	111	62
N.meningitidis_16S	SeqGr23690_1	1	98.44	64	0	1	142	205	1	63	8e-25	111	62
N.meningitidis_16S	SeqGr22404_1	1	98.44	64	0	1	142	205	1	63	8e-25	111	62
N.meningitidis_16S	SeqGr20687_1	1	98.44	64	0	1	142	205	1	63	8e-25	111	62
N.meningitidis_16S	SeqGr20446_1	1	98.44	64	0	1	142	205	1	63	8e-25	111	62
N.meningitidis_16S	SeqGr20011_1	1	98.44	64	0	1	142	205	1	63	8e-25	111	62
N.meningitidis_16S	SeqGr19825_1	1	98.44	64	0	1	142	205	1	63	8e-25	111	62
N.meningitidis_16S	SeqGr19223_1	1	98.44	64	0	1	142	205	1	63	8e-25	111	62
N.meningitidis_16S	SeqGr18680_2	2	98.44	64	0	1	142	205	1	63	8e-25	111	62
N.meningitidis_16S	SeqGr17319_1	1	98.44	64	0	1	142	205	1	63	8e-25	111	62
N.meningitidis_16S	SeqGr17095_1	1	98.44	64	0	1	142	205	1	63	8e-25	111	62
N.meningitidis_16S	SeqGr16840_7	7	98.44	64	0	1	142	205	1	63	8e-25	111	62
N.meningitidis_16S	SeqGr16394_4	4	98.44	64	0	1	142	205	1	63	8e-25	111	62
N.meningitidis_16S	SeqGr15569_1	1	98.44	64	0	1	142	205	1	63	8e-25	111	62
N.meningitidis_16S	SeqGr15521_27	27	98.44	64	0	1	142	205	1	63	8e-25	111	62
N.meningitidis_16S	SeqGr15421_1	1	98.44	64	0	1	142	205	1	63	8e-25	111	62
N.meningitidis_16S	SeqGr15311_16	16	98.44	64	0	1	142	205	1	63	8e-25	111	62
N.meningitidis_16S	SeqGr15299_14	14	98.44	64	0	1	142	205	1	63	8e-25	111	62
N.meningitidis_16S	SeqGr14904_4	4	98.44	64	0	1	142	205	1	63	8e-25	111	62
N.meningitidis_16S	SeqGr14532_1	1	98.44	64	0	1	142	205	1	63	8e-25	111	62
N.meningitidis_16S	SeqGr14454_1	1	98.44	64	0	1	142	205	1	63	8e-25	111	62
N.meningitidis_16S	SeqGr14407_5	5	98.44	64	0	1	142	205	1	63	8e-25	111	62
N.meningitidis_16S	SeqGr13281_1	1	98.44	64	0	1	142	205	1	63	8e-25	111	62
N.meningitidis_16S	SeqGr13238_1	1	98.44	64	0	1	142	205	1	63	8e-25	111	62
N.meningitidis_16S	SeqGr13108_5	5	98.44	64	0	1	142	205	1	63	8e-25	111	62
N.meningitidis_16S	SeqGr13019_4	4	98.44	64	0	1	142	205	1	63	8e-25	111	62
N.meningitidis_16S	SeqGr11880_1	1	98.44	64	0	1	142	205	1	63	8e-25	111	62
N.meningitidis_16S	SeqGr10161_1	1	98.44	64	0	1	142	205	1	63	8e-25	111	62
N.meningitidis_16S	SeqGr8782_1	1	98.44	64	0	1	142	205	1	63	8e-25	111	62
N.meningitidis_16S	SeqGr8721_33	33	98.44	64	0	1	142	205	1	63	8e-25	111	62
N.meningitidis_16S	SeqGr8363_1	1	98.44	64	0	1	142	205	1	63	8e-25	111	62
N.meningitidis_16S	SeqGr7499_1	1	98.44	64	0	1	142	205	1	63	8e-25	111	62
N.meningitidis_16S	SeqGr7382_1	1	98.44	64	0	1	142	205	1	63	8e-25	111	62
N.meningitidis_16S	SeqGr7108_33	33	98.44	64	0	1	142	205	1	63	8e-25	111	62
N.meningitidis_16S	SeqGr6957_1	1	98.44	64	0	1	142	205	1	63	8e-25	111	62
N.meningitidis_16S	SeqGr5668_1	1	98.44	64	0	1	142	205	1	63	8e-25	111	62
N.meningitidis_16S	SeqGr5532_8	8	98.44	64	0	1	142	205	1	63	8e-25	111	62
N.meningitidis_16S	SeqGr4729_2	2	98.44	64	0	1	142	205	1	63	8e-25	111	62
N.meningitidis_16S	SeqGr4627_20	20	98.44	64	0	1	142	205	1	63	8e-25	111	62
N.meningitidis_16S	SeqGr4609_1	1	98.44	64	0	1	142	205	1	63	8e-25	111	62
N.meningitidis_16S	SeqGr4274_1	1	98.44	64	0	1	142	205	1	63	8e-25	111	62
N.meningitidis_16S	SeqGr4092_2	2	98.44	64	0	1	142	205	1	63	8e-25	111	62
N.meningitidis_16S	SeqGr3517_4	4	98.44	64	0	1	142	205	1	63	8e-25	111	62
N.meningitidis_16S	SeqGr3176_1	1	98.44	64	0	1	142	205	1	63	8e-25	111	62
N.meningitidis_16S	SeqGr3147_8	8	98.44	64	0	1	142	205	1	63	8e-25	111	62
N.meningitidis_16S	SeqGr3047_8	8	98.44	64	0	1	142	205	1	63	8e-25	111	62
N.meningitidis_16S	SeqGr3006_22	22	98.44	64	0	1	142	205	1	63	8e-25	111	62
N.meningitidis_16S	SeqGr2759_29	29	98.44	64	0	1	142	205	1	63	8e-25	111	62
N.meningitidis_16S	SeqGr2639_1	1	98.44	64	0	1	142	205	1	63	8e-25	111	62
N.meningitidis_16S	SeqGr1592_22	22	98.44	64	0	1	142	205	1	63	8e-25	111	62
N.meningitidis_16S	SeqGr1539_1	1	98.44	64	0	1	142	205	1	63	8e-25	111	62
N.meningitidis_16S	SeqGr1351_1	1	98.44	64	0	1	142	205	1	63	8e-25	111	62
N.meningitidis_16S	SeqGr1087_51	51	98.44	64	0	1	142	205	1	63	8e-25	111	62
N.meningitidis_16S	SeqGr460_1	1	98.44	64	0	1	142	205	1	63	8e-25	111	62
N.meningitidis_16S	SeqGr225_1	1	98.44	64	0	1	142	205	1	63	8e-25	111	62
N.meningitidis_16S	SeqGr521273_1	1	98.41	63	0	1	143	205	1	62	3e-24	110	61
N.meningitidis_16S	SeqGr516021_1	1	98.41	63	0	1	143	205	1	62	3e-24	110	61
N.meningitidis_16S	SeqGr503523_1	1	98.41	63	0	1	143	205	1	62	3e-24	110	61
N.meningitidis_16S	SeqGr488269_1	1	98.41	63	0	1	143	205	1	62	3e-24	110	61
N.meningitidis_16S	SeqGr479909_1	1	98.41	63	0	1	142	204	1	62	3e-24	110	61
N.meningitidis_16S	SeqGr466969_1	1	98.41	63	0	1	142	204	1	62	3e-24	110	61
N.meningitidis_16S	SeqGr456888_1	1	98.41	63	0	1	143	205	1	62	3e-24	110	61
N.meningitidis_16S	SeqGr451521_2	2	98.41	63	0	1	143	205	1	62	3e-24	110	61
N.meningitidis_16S	SeqGr436622_1	1	98.41	63	0	1	143	205	1	62	3e-24	110	61
N.meningitidis_16S	SeqGr436579_1	1	98.41	63	0	1	143	205	1	62	3e-24	110	61
N.meningitidis_16S	SeqGr435956_1	1	98.41	63	0	1	143	205	1	62	3e-24	110	61
N.meningitidis_16S	SeqGr435833_1	1	96.97	66	1	1	140	205	24	88	3e-24	110	64
N.meningitidis_16S	SeqGr424292_1	1	98.41	63	0	1	143	205	1	62	3e-24	110	61
N.meningitidis_16S	SeqGr418544_1	1	98.41	63	0	1	143	205	1	62	3e-24	110	61
N.meningitidis_16S	SeqGr417327_1	1	100	59	0	0	39	97	1	59	3e-24	110	58
N.meningitidis_16S	SeqGr400774_1	1	98.41	63	0	1	143	205	1	62	3e-24	110	61
N.meningitidis_16S	SeqGr383195_1	1	98.41	63	0	1	143	205	1	62	3e-24	110	61
N.meningitidis_16S	SeqGr380457_1	1	98.41	63	0	1	142	204	1	62	3e-24	110	61
N.meningitidis_16S	SeqGr378880_1	1	98.41	63	0	1	143	205	1	62	3e-24	110	61
N.meningitidis_16S	SeqGr378732_1	1	98.41	63	0	1	143	205	1	62	3e-24	110	61
N.meningitidis_16S	SeqGr374173_1	1	98.41	63	0	1	143	205	1	62	3e-24	110	61
N.meningitidis_16S	SeqGr373875_1	1	98.41	63	0	1	142	204	1	62	3e-24	110	61
N.meningitidis_16S	SeqGr370917_1	1	98.41	63	0	1	143	205	1	62	3e-24	110	61
N.meningitidis_16S	SeqGr366713_1	1	98.41	63	0	1	143	205	1	62	3e-24	110	61
N.meningitidis_16S	SeqGr363194_1	1	98.41	63	0	1	142	204	1	62	3e-24	110	61
N.meningitidis_16S	SeqGr358806_1	1	98.41	63	0	1	143	205	1	62	3e-24	110	61
N.meningitidis_16S	SeqGr348946_1	1	98.41	63	0	1	142	204	1	62	3e-24	110	61
N.meningitidis_16S	SeqGr335559_1	1	98.41	63	0	1	142	204	1	62	3e-24	110	61
N.meningitidis_16S	SeqGr327924_1	1	98.41	63	0	1	143	205	1	62	3e-24	110	61
N.meningitidis_16S	SeqGr326420_1	1	98.41	63	0	1	143	205	1	62	3e-24	110	61
N.meningitidis_16S	SeqGr324940_1	1	98.41	63	0	1	142	204	1	62	3e-24	110	61
N.meningitidis_16S	SeqGr322536_2	2	98.41	63	0	1	143	205	1	62	3e-24	110	61
N.meningitidis_16S	SeqGr318012_1	1	98.41	63	0	1	142	204	1	62	3e-24	110	61
N.meningitidis_16S	SeqGr314779_1	1	98.41	63	0	1	143	205	1	62	3e-24	110	61
N.meningitidis_16S	SeqGr309614_1	1	98.41	63	0	1	142	204	1	62	3e-24	110	61
N.meningitidis_16S	SeqGr308721_1	1	100	59	0	0	67	125	1	59	3e-24	110	58
N.meningitidis_16S	SeqGr302452_3	3	98.41	63	0	1	143	205	1	62	3e-24	110	61
N.meningitidis_16S	SeqGr301368_2	2	98.41	63	0	1	143	205	1	62	3e-24	110	61
N.meningitidis_16S	SeqGr296133_1	1	98.41	63	0	1	142	204	1	62	3e-24	110	61
N.meningitidis_16S	SeqGr292653_3	3	98.41	63	0	1	143	205	1	62	3e-24	110	61
N.meningitidis_16S	SeqGr287649_1	1	98.41	63	0	1	142	204	1	62	3e-24	110	61
N.meningitidis_16S	SeqGr286325_1	1	98.41	63	0	1	143	205	1	62	3e-24	110	61
N.meningitidis_16S	SeqGr283018_1	1	98.41	63	0	1	143	205	1	62	3e-24	110	61
N.meningitidis_16S	SeqGr282947_1	1	98.41	63	0	1	142	204	1	62	3e-24	110	61
N.meningitidis_16S	SeqGr279747_1	1	98.41	63	0	1	142	204	1	62	3e-24	110	61
N.meningitidis_16S	SeqGr273093_1	1	98.41	63	0	1	142	204	1	62	3e-24	110	61
N.meningitidis_16S	SeqGr251300_1	1	98.41	63	0	1	143	205	1	62	3e-24	110	61
N.meningitidis_16S	SeqGr249732_2	2	98.41	63	0	1	143	205	1	62	3e-24	110	61
N.meningitidis_16S	SeqGr247372_1	1	98.41	63	0	1	142	204	1	62	3e-24	110	61
N.meningitidis_16S	SeqGr239786_1	1	98.41	63	0	1	143	205	1	62	3e-24	110	61
N.meningitidis_16S	SeqGr233006_2	2	98.41	63	0	1	143	205	1	62	3e-24	110	61
N.meningitidis_16S	SeqGr228095_2	2	100	59	0	0	66	124	1	59	3e-24	110	58
N.meningitidis_16S	SeqGr221074_1	1	98.41	63	0	1	143	205	1	62	3e-24	110	61
N.meningitidis_16S	SeqGr217446_1	1	98.41	63	0	1	142	204	1	62	3e-24	110	61
N.meningitidis_16S	SeqGr217136_1	1	98.41	63	0	1	143	205	1	62	3e-24	110	61
N.meningitidis_16S	SeqGr191941_1	1	98.41	63	0	1	142	204	1	62	3e-24	110	61
N.meningitidis_16S	SeqGr178147_1	1	98.41	63	0	1	143	205	1	62	3e-24	110	61
N.meningitidis_16S	SeqGr167386_1	1	98.41	63	0	1	143	205	1	62	3e-24	110	61
N.meningitidis_16S	SeqGr158347_1	1	98.41	63	0	1	143	205	1	62	3e-24	110	61
N.meningitidis_16S	SeqGr125409_1	1	98.41	63	0	1	143	205	1	62	3e-24	110	61
N.meningitidis_16S	SeqGr121846_1	1	98.41	63	0	1	143	205	1	62	3e-24	110	61
N.meningitidis_16S	SeqGr108050_1	1	98.41	63	0	1	143	205	1	62	3e-24	110	61
N.meningitidis_16S	SeqGr105192_1	1	98.41	63	0	1	143	205	1	62	3e-24	110	61
N.meningitidis_16S	SeqGr104871_1	1	98.41	63	0	1	143	205	1	62	3e-24	110	61
N.meningitidis_16S	SeqGr101524_1	1	98.41	63	0	1	143	205	1	62	3e-24	110	61
N.meningitidis_16S	SeqGr97689_1	1	98.41	63	0	1	143	205	1	62	3e-24	110	61
N.meningitidis_16S	SeqGr94683_1	1	98.41	63	0	1	142	204	1	62	3e-24	110	61
N.meningitidis_16S	SeqGr91549_1	1	98.41	63	0	1	142	204	1	62	3e-24	110	61
N.meningitidis_16S	SeqGr87720_1	1	98.41	63	0	1	143	205	1	62	3e-24	110	61
N.meningitidis_16S	SeqGr85761_1	1	98.41	63	0	1	143	205	1	62	3e-24	110	61
N.meningitidis_16S	SeqGr83189_1	1	98.41	63	0	1	142	204	1	62	3e-24	110	61
N.meningitidis_16S	SeqGr82120_1	1	95.59	68	3	0	1	68	34	101	3e-24	110	67
N.meningitidis_16S	SeqGr78957_1	1	98.41	63	0	1	143	205	1	62	3e-24	110	61
N.meningitidis_16S	SeqGr71237_1	1	98.41	63	0	1	143	205	1	62	3e-24	110	61
N.meningitidis_16S	SeqGr69255_2	2	98.41	63	0	1	143	205	1	62	3e-24	110	61
N.meningitidis_16S	SeqGr61922_1	1	98.41	63	0	1	143	205	1	62	3e-24	110	61
N.meningitidis_16S	SeqGr58515_1	1	98.41	63	0	1	143	205	1	62	3e-24	110	61
N.meningitidis_16S	SeqGr50399_1	1	98.41	63	0	1	142	204	1	62	3e-24	110	61
N.meningitidis_16S	SeqGr49921_4	4	98.41	63	0	1	143	205	1	62	3e-24	110	61
N.meningitidis_16S	SeqGr49352_1	1	98.41	63	0	1	143	205	2	63	3e-24	110	61
N.meningitidis_16S	SeqGr46055_1	1	98.41	63	0	1	143	205	1	62	3e-24	110	61
N.meningitidis_16S	SeqGr43099_19	19	98.41	63	0	1	142	204	1	62	3e-24	110	61
N.meningitidis_16S	SeqGr42374_1	1	98.41	63	0	1	143	205	1	62	3e-24	110	61
N.meningitidis_16S	SeqGr29306_3	3	98.41	63	0	1	143	205	1	62	3e-24	110	61
N.meningitidis_16S	SeqGr25800_1	1	98.41	63	0	1	143	205	1	62	3e-24	110	61
N.meningitidis_16S	SeqGr25221_1	1	98.41	63	0	1	142	204	1	62	3e-24	110	61
N.meningitidis_16S	SeqGr22797_1	1	98.41	63	0	1	143	205	1	62	3e-24	110	61
N.meningitidis_16S	SeqGr22280_1	1	98.41	63	0	1	143	205	1	62	3e-24	110	61
N.meningitidis_16S	SeqGr20277_1	1	98.41	63	0	1	142	204	1	62	3e-24	110	61
N.meningitidis_16S	SeqGr15467_35	35	98.41	63	0	1	142	204	1	62	3e-24	110	61
N.meningitidis_16S	SeqGr13782_1	1	98.41	63	0	1	143	205	1	62	3e-24	110	61
N.meningitidis_16S	SeqGr12115_1	1	98.41	63	0	1	143	205	1	62	3e-24	110	61
N.meningitidis_16S	SeqGr8091_1	1	98.41	63	0	1	142	204	1	62	3e-24	110	61
N.meningitidis_16S	SeqGr3080_1	1	98.41	63	0	1	143	205	1	62	3e-24	110	61
N.meningitidis_16S	SeqGr2143_19	19	98.41	63	0	1	142	204	1	62	3e-24	110	61
N.meningitidis_16S	SeqGr1452_32	32	98.41	63	0	1	142	204	1	62	3e-24	110	61
N.meningitidis_16S	SeqGr512909_1	1	98.39	62	0	1	144	205	1	61	1e-23	108	60
N.meningitidis_16S	SeqGr486585_1	1	98.39	62	0	1	144	205	3	63	1e-23	108	60
N.meningitidis_16S	SeqGr430899_1	1	100	58	0	0	66	123	1	58	1e-23	108	57
N.meningitidis_16S	SeqGr413905_1	1	98.39	62	0	1	143	204	1	61	1e-23	108	60
N.meningitidis_16S	SeqGr410818_1	1	98.39	62	0	1	144	205	1	61	1e-23	108	60
N.meningitidis_16S	SeqGr376285_1	1	100	58	0	0	84	141	32	89	1e-23	108	57
N.meningitidis_16S	SeqGr368045_1	1	100	58	0	0	83	140	1	58	1e-23	108	57
N.meningitidis_16S	SeqGr347110_1	1	98.39	62	0	1	143	204	1	61	1e-23	108	60
N.meningitidis_16S	SeqGr329877_1	1	93.15	73	5	0	66	138	1	73	1e-23	108	72
N.meningitidis_16S	SeqGr298299_1	1	98.39	62	0	1	143	204	1	61	1e-23	108	60
N.meningitidis_16S	SeqGr271028_1	1	98.39	62	0	1	142	203	1	61	1e-23	108	60
N.meningitidis_16S	SeqGr250843_1	1	96.92	65	0	2	142	205	1	64	1e-23	108	63
N.meningitidis_16S	SeqGr226984_1	1	98.39	62	0	1	142	203	1	61	1e-23	108	60
N.meningitidis_16S	SeqGr199177_1	1	100	58	0	0	66	123	1	58	1e-23	108	57
N.meningitidis_16S	SeqGr184050_2	2	98.39	62	0	1	142	203	1	61	1e-23	108	60
N.meningitidis_16S	SeqGr183067_1	1	98.39	62	0	1	144	205	1	61	1e-23	108	60
N.meningitidis_16S	SeqGr118420_1	1	98.39	62	0	1	144	205	1	61	1e-23	108	60
N.meningitidis_16S	SeqGr116122_1	1	98.39	62	0	1	142	203	1	61	1e-23	108	60
N.meningitidis_16S	SeqGr107322_1	1	98.39	62	0	1	143	204	1	61	1e-23	108	60
N.meningitidis_16S	SeqGr97593_6	6	98.39	62	0	1	142	203	1	61	1e-23	108	60
N.meningitidis_16S	SeqGr37181_1	1	98.39	62	0	1	144	205	1	61	1e-23	108	60
N.meningitidis_16S	SeqGr28297_1	1	98.39	62	0	1	142	203	1	61	1e-23	108	60
N.meningitidis_16S	SeqGr20361_40	40	98.39	62	0	1	142	203	1	61	1e-23	108	60
N.meningitidis_16S	SeqGr531831_1	1	98.36	61	0	1	145	205	4	63	4e-23	106	59
N.meningitidis_16S	SeqGr530434_1	1	96.88	64	1	1	142	205	1	63	4e-23	106	62
N.meningitidis_16S	SeqGr522381_1	1	96.88	64	1	1	142	205	1	63	4e-23	106	62
N.meningitidis_16S	SeqGr512422_1	1	96.88	64	1	1	142	205	1	63	4e-23	106	62
N.meningitidis_16S	SeqGr509897_1	1	96.88	64	1	1	142	205	1	63	4e-23	106	62
N.meningitidis_16S	SeqGr507583_1	1	96.88	64	1	1	142	205	1	63	4e-23	106	62
N.meningitidis_16S	SeqGr506263_1	1	96.88	64	1	1	142	205	1	63	4e-23	106	62
N.meningitidis_16S	SeqGr501178_1	1	96.88	64	1	1	142	205	1	63	4e-23	106	62
N.meningitidis_16S	SeqGr500411_1	1	96.88	64	1	1	142	205	1	63	4e-23	106	62
N.meningitidis_16S	SeqGr500214_1	1	96.88	64	1	1	142	205	1	63	4e-23	106	62
N.meningitidis_16S	SeqGr499358_1	1	98.36	61	0	1	142	202	1	60	4e-23	106	59
N.meningitidis_16S	SeqGr496471_1	1	98.36	61	0	1	145	205	1	60	4e-23	106	59
N.meningitidis_16S	SeqGr495985_1	1	96.88	64	1	1	142	205	1	63	4e-23	106	62
N.meningitidis_16S	SeqGr495161_1	1	96.88	64	1	1	142	205	1	63	4e-23	106	62
N.meningitidis_16S	SeqGr493841_1	1	96.88	64	1	1	142	205	1	63	4e-23	106	62
N.meningitidis_16S	SeqGr491501_1	1	98.36	61	0	1	144	204	1	60	4e-23	106	59
N.meningitidis_16S	SeqGr489607_1	1	96.88	64	1	1	142	205	1	63	4e-23	106	62
N.meningitidis_16S	SeqGr486638_1	1	100	57	0	0	84	140	1	57	4e-23	106	56
N.meningitidis_16S	SeqGr484660_1	1	96.88	64	1	1	142	205	1	63	4e-23	106	62
N.meningitidis_16S	SeqGr484245_1	1	96.88	64	1	1	142	205	1	63	4e-23	106	62
N.meningitidis_16S	SeqGr481620_1	1	96.88	64	1	1	142	205	1	63	4e-23	106	62
N.meningitidis_16S	SeqGr481210_1	1	96.88	64	1	1	142	205	1	63	4e-23	106	62
N.meningitidis_16S	SeqGr480707_1	1	96.88	64	1	1	142	205	1	63	4e-23	106	62
N.meningitidis_16S	SeqGr473434_1	1	96.88	64	1	1	142	205	1	63	4e-23	106	62
N.meningitidis_16S	SeqGr472791_1	1	96.88	64	1	1	142	205	1	63	4e-23	106	62
N.meningitidis_16S	SeqGr469666_1	1	98.36	61	0	1	142	202	1	60	4e-23	106	59
N.meningitidis_16S	SeqGr464902_1	1	96.88	64	1	1	142	205	1	63	4e-23	106	62
N.meningitidis_16S	SeqGr463079_1	1	98.36	61	0	1	142	202	1	60	4e-23	106	59
N.meningitidis_16S	SeqGr460463_1	1	96.88	64	1	1	142	205	1	63	4e-23	106	62
N.meningitidis_16S	SeqGr460298_1	1	96.88	64	1	1	142	205	1	63	4e-23	106	62
N.meningitidis_16S	SeqGr459785_1	1	96.88	64	1	1	142	205	1	63	4e-23	106	62
N.meningitidis_16S	SeqGr459613_1	1	96.88	64	1	1	142	205	1	63	4e-23	106	62
N.meningitidis_16S	SeqGr458171_1	1	96.88	64	1	1	142	205	1	63	4e-23	106	62
N.meningitidis_16S	SeqGr457989_1	1	98.36	61	0	1	145	205	1	60	4e-23	106	59
N.meningitidis_16S	SeqGr456396_1	1	96.88	64	1	1	142	205	1	63	4e-23	106	62
N.meningitidis_16S	SeqGr449012_1	1	98.36	61	0	1	145	205	4	63	4e-23	106	59
N.meningitidis_16S	SeqGr446537_1	1	96.88	64	1	1	142	205	1	63	4e-23	106	62
N.meningitidis_16S	SeqGr446403_1	1	98.36	61	0	1	143	203	1	60	4e-23	106	59
N.meningitidis_16S	SeqGr446069_1	1	96.88	64	1	1	142	205	1	63	4e-23	106	62
N.meningitidis_16S	SeqGr444868_1	1	96.88	64	1	1	142	205	1	63	4e-23	106	62
N.meningitidis_16S	SeqGr435274_1	1	96.88	64	1	1	142	205	1	63	4e-23	106	62
N.meningitidis_16S	SeqGr430999_1	1	96.88	64	1	1	142	205	1	63	4e-23	106	62
N.meningitidis_16S	SeqGr429261_1	1	96.88	64	1	1	142	205	1	63	4e-23	106	62
N.meningitidis_16S	SeqGr426937_1	1	96.88	64	0	2	142	205	1	62	4e-23	106	61
N.meningitidis_16S	SeqGr426303_1	1	96.88	64	1	1	142	205	1	63	4e-23	106	62
N.meningitidis_16S	SeqGr423825_1	1	96.88	64	1	1	142	205	1	63	4e-23	106	62
N.meningitidis_16S	SeqGr423094_1	1	98.36	61	0	1	142	202	1	60	4e-23	106	59
N.meningitidis_16S	SeqGr421441_1	1	96.88	64	1	1	142	205	1	63	4e-23	106	62
N.meningitidis_16S	SeqGr419512_1	1	96.88	64	1	1	142	205	1	63	4e-23	106	62
N.meningitidis_16S	SeqGr415218_1	1	96.88	64	1	1	142	205	1	63	4e-23	106	62
N.meningitidis_16S	SeqGr414386_1	1	98.36	61	0	1	142	202	1	60	4e-23	106	59
N.meningitidis_16S	SeqGr412046_1	1	96.88	64	1	1	142	205	1	63	4e-23	106	62
N.meningitidis_16S	SeqGr411916_1	1	96.88	64	1	1	142	205	1	63	4e-23	106	62
N.meningitidis_16S	SeqGr408281_1	1	96.88	64	1	1	142	205	1	63	4e-23	106	62
N.meningitidis_16S	SeqGr406930_1	1	96.88	64	1	1	142	205	1	63	4e-23	106	62
N.meningitidis_16S	SeqGr406757_1	1	96.88	64	1	1	142	205	1	63	4e-23	106	62
N.meningitidis_16S	SeqGr400798_1	1	96.88	64	1	1	142	205	1	63	4e-23	106	62
N.meningitidis_16S	SeqGr400350_1	1	96.88	64	1	1	142	205	1	63	4e-23	106	62
N.meningitidis_16S	SeqGr394959_1	1	100	57	0	0	72	128	1	57	4e-23	106	56
N.meningitidis_16S	SeqGr394055_1	1	98.36	61	0	1	142	202	1	60	4e-23	106	59
N.meningitidis_16S	SeqGr393889_2	2	96.88	64	1	1	142	205	1	63	4e-23	106	62
N.meningitidis_16S	SeqGr392335_1	1	96.88	64	1	1	142	205	1	63	4e-23	106	62
N.meningitidis_16S	SeqGr391015_1	1	96.88	64	1	1	142	205	1	63	4e-23	106	62
N.meningitidis_16S	SeqGr390497_1	1	96.88	64	1	1	142	205	1	63	4e-23	106	62
N.meningitidis_16S	SeqGr387531_1	1	96.88	64	1	1	142	205	1	63	4e-23	106	62
N.meningitidis_16S	SeqGr386459_1	1	96.88	64	1	1	142	205	1	63	4e-23	106	62
N.meningitidis_16S	SeqGr383371_1	1	96.88	64	1	1	142	205	1	63	4e-23	106	62
N.meningitidis_16S	SeqGr383040_1	1	98.36	61	0	1	142	202	1	60	4e-23	106	59
N.meningitidis_16S	SeqGr382432_1	1	96.88	64	0	1	142	205	1	62	4e-23	106	61
N.meningitidis_16S	SeqGr382156_1	1	96.88	64	1	1	142	205	1	63	4e-23	106	62
N.meningitidis_16S	SeqGr377367_1	1	96.88	64	1	1	142	205	1	63	4e-23	106	62
N.meningitidis_16S	SeqGr377200_1	1	96.88	64	1	1	142	205	1	63	4e-23	106	62
N.meningitidis_16S	SeqGr376608_1	1	96.88	64	0	2	142	205	1	62	4e-23	106	61
N.meningitidis_16S	SeqGr374181_1	1	96.88	64	0	1	142	205	1	62	4e-23	106	61
N.meningitidis_16S	SeqGr373208_1	1	96.88	64	1	1	142	205	1	63	4e-23	106	62
N.meningitidis_16S	SeqGr371918_1	1	96.88	64	1	1	142	205	1	63	4e-23	106	62
N.meningitidis_16S	SeqGr371633_1	1	96.88	64	1	1	142	205	1	63	4e-23	106	62
N.meningitidis_16S	SeqGr369086_1	1	96.88	64	1	1	142	205	1	63	4e-23	106	62
N.meningitidis_16S	SeqGr365582_1	1	96.88	64	1	1	142	205	1	63	4e-23	106	62
N.meningitidis_16S	SeqGr364900_1	1	96.88	64	1	1	142	205	1	63	4e-23	106	62
N.meningitidis_16S	SeqGr364718_1	1	96.88	64	1	1	142	205	1	63	4e-23	106	62
N.meningitidis_16S	SeqGr364008_1	1	98.36	61	0	1	145	205	1	60	4e-23	106	59
N.meningitidis_16S	SeqGr361979_1	1	96.88	64	1	1	142	205	1	63	4e-23	106	62
N.meningitidis_16S	SeqGr361061_1	1	96.88	64	1	1	142	205	1	63	4e-23	106	62
N.meningitidis_16S	SeqGr360618_1	1	96.88	64	1	1	142	205	1	63	4e-23	106	62
N.meningitidis_16S	SeqGr360447_1	1	98.36	61	0	1	142	202	1	60	4e-23	106	59
N.meningitidis_16S	SeqGr359778_1	1	96.88	64	1	1	142	205	1	63	4e-23	106	62
N.meningitidis_16S	SeqGr357120_1	1	98.36	61	0	1	142	202	1	60	4e-23	106	59
N.meningitidis_16S	SeqGr353606_1	1	96.88	64	1	1	142	205	1	63	4e-23	106	62
N.meningitidis_16S	SeqGr352723_1	1	98.36	61	0	1	142	202	1	60	4e-23	106	59
N.meningitidis_16S	SeqGr351389_1	1	96.88	64	1	1	142	205	1	63	4e-23	106	62
N.meningitidis_16S	SeqGr350727_1	1	96.88	64	1	1	142	205	1	63	4e-23	106	62
N.meningitidis_16S	SeqGr350231_1	1	96.88	64	1	1	142	205	1	63	4e-23	106	62
N.meningitidis_16S	SeqGr349768_1	1	96.88	64	1	1	142	205	1	63	4e-23	106	62
N.meningitidis_16S	SeqGr347841_1	1	96.88	64	1	1	142	205	1	63	4e-23	106	62
N.meningitidis_16S	SeqGr345035_1	1	96.88	64	1	1	142	205	1	63	4e-23	106	62
N.meningitidis_16S	SeqGr343260_1	1	96.88	64	1	1	142	205	1	63	4e-23	106	62
N.meningitidis_16S	SeqGr341371_1	1	96.88	64	1	1	142	205	1	63	4e-23	106	62
N.meningitidis_16S	SeqGr338406_1	1	96.88	64	1	1	142	205	1	63	4e-23	106	62
N.meningitidis_16S	SeqGr338028_1	1	96.88	64	1	1	142	205	1	63	4e-23	106	62
N.meningitidis_16S	SeqGr337953_1	1	96.88	64	1	1	142	205	1	63	4e-23	106	62
N.meningitidis_16S	SeqGr337070_1	1	96.88	64	1	1	142	205	1	63	4e-23	106	62
N.meningitidis_16S	SeqGr333846_1	1	95.45	66	3	0	1	66	36	101	4e-23	106	65
N.meningitidis_16S	SeqGr332463_1	1	96.88	64	0	2	142	205	1	62	4e-23	106	61
N.meningitidis_16S	SeqGr332321_1	1	96.88	64	1	1	142	205	1	63	4e-23	106	62
N.meningitidis_16S	SeqGr328151_1	1	96.88	64	1	1	142	205	1	63	4e-23	106	62
N.meningitidis_16S	SeqGr327004_1	1	96.88	64	1	1	142	205	1	63	4e-23	106	62
N.meningitidis_16S	SeqGr325274_1	1	96.88	64	1	1	142	205	1	63	4e-23	106	62
N.meningitidis_16S	SeqGr323218_1	1	96.88	64	1	1	142	205	1	63	4e-23	106	62
N.meningitidis_16S	SeqGr322939_1	1	96.88	64	1	1	142	205	1	63	4e-23	106	62
N.meningitidis_16S	SeqGr321691_1	1	96.88	64	1	1	142	205	1	63	4e-23	106	62
N.meningitidis_16S	SeqGr316606_1	1	96.88	64	1	1	142	205	1	63	4e-23	106	62
N.meningitidis_16S	SeqGr315260_1	1	96.88	64	1	1	142	205	1	63	4e-23	106	62
N.meningitidis_16S	SeqGr311845_1	1	96.88	64	1	1	142	205	1	63	4e-23	106	62
N.meningitidis_16S	SeqGr311583_1	1	96.88	64	1	1	142	205	1	63	4e-23	106	62
N.meningitidis_16S	SeqGr310586_1	1	98.36	61	0	1	142	202	1	60	4e-23	106	59
N.meningitidis_16S	SeqGr307866_1	1	96.88	64	1	1	142	205	1	63	4e-23	106	62
N.meningitidis_16S	SeqGr306986_1	1	96.88	64	1	1	142	205	1	63	4e-23	106	62
N.meningitidis_16S	SeqGr306984_1	1	96.88	64	0	2	142	205	1	62	4e-23	106	61
N.meningitidis_16S	SeqGr306942_1	1	96.88	64	0	2	142	205	1	62	4e-23	106	61
N.meningitidis_16S	SeqGr304431_1	1	96.88	64	1	1	142	205	1	63	4e-23	106	62
N.meningitidis_16S	SeqGr304429_1	1	96.88	64	1	1	142	205	1	63	4e-23	106	62
N.meningitidis_16S	SeqGr304164_1	1	96.88	64	1	1	142	205	1	63	4e-23	106	62
N.meningitidis_16S	SeqGr299865_1	1	96.88	64	1	1	142	205	1	63	4e-23	106	62
N.meningitidis_16S	SeqGr298271_1	1	96.88	64	1	1	142	205	1	63	4e-23	106	62
N.meningitidis_16S	SeqGr295518_1	1	96.88	64	1	1	142	205	1	63	4e-23	106	62
N.meningitidis_16S	SeqGr294586_1	1	96.88	64	1	1	142	205	1	63	4e-23	106	62
N.meningitidis_16S	SeqGr290430_1	1	96.88	64	1	1	142	205	1	63	4e-23	106	62
N.meningitidis_16S	SeqGr288416_1	1	98.36	61	0	1	142	202	1	60	4e-23	106	59
N.meningitidis_16S	SeqGr285036_1	1	96.88	64	1	1	142	205	1	63	4e-23	106	62
N.meningitidis_16S	SeqGr284752_1	1	96.88	64	1	1	142	205	1	63	4e-23	106	62
N.meningitidis_16S	SeqGr284250_1	1	96.88	64	1	1	142	205	1	63	4e-23	106	62
N.meningitidis_16S	SeqGr279934_1	1	96.88	64	1	1	142	205	1	63	4e-23	106	62
N.meningitidis_16S	SeqGr276908_1	1	96.88	64	1	1	142	205	1	63	4e-23	106	62
N.meningitidis_16S	SeqGr275784_1	1	96.88	64	1	1	142	205	1	63	4e-23	106	62
N.meningitidis_16S	SeqGr272982_1	1	96.88	64	1	1	142	205	1	63	4e-23	106	62
N.meningitidis_16S	SeqGr272362_1	1	96.88	64	1	1	142	205	1	63	4e-23	106	62
N.meningitidis_16S	SeqGr271238_1	1	96.88	64	1	1	142	205	1	63	4e-23	106	62
N.meningitidis_16S	SeqGr269361_1	1	96.88	64	1	1	142	205	1	63	4e-23	106	62
N.meningitidis_16S	SeqGr263636_1	1	96.88	64	1	1	142	205	1	63	4e-23	106	62
N.meningitidis_16S	SeqGr262095_1	1	96.88	64	1	1	142	205	1	63	4e-23	106	62
N.meningitidis_16S	SeqGr260717_1	1	96.88	64	1	1	142	205	1	63	4e-23	106	62
N.meningitidis_16S	SeqGr257677_1	1	96.88	64	1	1	142	205	1	63	4e-23	106	62
N.meningitidis_16S	SeqGr256946_1	1	96.88	64	1	1	142	205	1	63	4e-23	106	62
N.meningitidis_16S	SeqGr256090_1	1	96.88	64	1	1	142	205	1	63	4e-23	106	62
N.meningitidis_16S	SeqGr255988_1	1	96.88	64	1	1	142	205	1	63	4e-23	106	62
N.meningitidis_16S	SeqGr255380_1	1	96.88	64	1	1	142	205	1	63	4e-23	106	62
N.meningitidis_16S	SeqGr254314_1	1	96.88	64	1	1	142	205	1	63	4e-23	106	62
N.meningitidis_16S	SeqGr253847_1	1	96.88	64	1	1	142	205	1	63	4e-23	106	62
N.meningitidis_16S	SeqGr250988_1	1	96.88	64	1	1	142	205	1	63	4e-23	106	62
N.meningitidis_16S	SeqGr250248_1	1	98.36	61	0	1	142	202	1	60	4e-23	106	59
N.meningitidis_16S	SeqGr250043_1	1	96.88	64	1	1	142	205	1	63	4e-23	106	62
N.meningitidis_16S	SeqGr249171_1	1	96.88	64	1	1	142	205	1	63	4e-23	106	62
N.meningitidis_16S	SeqGr248190_1	1	96.88	64	1	1	142	205	1	63	4e-23	106	62
N.meningitidis_16S	SeqGr248145_1	1	96.88	64	1	1	142	205	1	63	4e-23	106	62
N.meningitidis_16S	SeqGr247802_1	1	96.88	64	1	1	142	205	1	63	4e-23	106	62
N.meningitidis_16S	SeqGr246240_1	1	98.36	61	0	1	145	205	4	63	4e-23	106	59
N.meningitidis_16S	SeqGr243980_1	1	96.88	64	1	1	142	205	1	63	4e-23	106	62
N.meningitidis_16S	SeqGr241259_1	1	96.88	64	1	1	142	205	1	63	4e-23	106	62
N.meningitidis_16S	SeqGr240860_1	1	96.88	64	1	1	142	205	1	63	4e-23	106	62
N.meningitidis_16S	SeqGr234393_1	1	96.88	64	1	1	142	205	1	63	4e-23	106	62
N.meningitidis_16S	SeqGr231348_1	1	96.88	64	1	1	142	205	1	63	4e-23	106	62
N.meningitidis_16S	SeqGr231075_1	1	96.88	64	1	1	142	205	1	63	4e-23	106	62
N.meningitidis_16S	SeqGr229021_1	1	96.88	64	1	1	142	205	1	63	4e-23	106	62
N.meningitidis_16S	SeqGr227379_1	1	96.88	64	1	1	142	205	1	63	4e-23	106	62
N.meningitidis_16S	SeqGr226283_1	1	96.88	64	1	1	142	205	1	63	4e-23	106	62
N.meningitidis_16S	SeqGr224654_1	1	96.88	64	1	1	142	205	1	63	4e-23	106	62
N.meningitidis_16S	SeqGr221711_1	1	96.88	64	1	1	142	205	1	63	4e-23	106	62
N.meningitidis_16S	SeqGr215249_1	1	96.88	64	1	1	142	205	1	63	4e-23	106	62
N.meningitidis_16S	SeqGr215036_1	1	96.88	64	1	1	142	205	1	63	4e-23	106	62
N.meningitidis_16S	SeqGr214036_1	1	96.88	64	1	1	142	205	1	63	4e-23	106	62
N.meningitidis_16S	SeqGr210779_1	1	96.88	64	1	1	142	205	1	63	4e-23	106	62
N.meningitidis_16S	SeqGr209159_1	1	96.88	64	1	1	142	205	1	63	4e-23	106	62
N.meningitidis_16S	SeqGr208120_1	1	96.88	64	1	1	142	205	1	63	4e-23	106	62
N.meningitidis_16S	SeqGr206568_1	1	96.88	64	1	1	142	205	1	63	4e-23	106	62
N.meningitidis_16S	SeqGr202557_1	1	96.88	64	1	1	142	205	1	63	4e-23	106	62
N.meningitidis_16S	SeqGr201884_1	1	96.88	64	1	1	142	205	1	63	4e-23	106	62
N.meningitidis_16S	SeqGr201138_1	1	96.88	64	1	1	142	205	1	63	4e-23	106	62
N.meningitidis_16S	SeqGr200556_1	1	96.88	64	1	1	142	205	1	63	4e-23	106	62
N.meningitidis_16S	SeqGr200512_1	1	96.88	64	1	1	142	205	1	63	4e-23	106	62
N.meningitidis_16S	SeqGr199924_1	1	96.88	64	1	1	142	205	1	63	4e-23	106	62
N.meningitidis_16S	SeqGr199454_1	1	96.88	64	1	1	142	205	1	63	4e-23	106	62
N.meningitidis_16S	SeqGr199024_1	1	96.88	64	1	1	142	205	1	63	4e-23	106	62
N.meningitidis_16S	SeqGr198939_1	1	96.88	64	1	1	142	205	1	63	4e-23	106	62
N.meningitidis_16S	SeqGr197404_5	5	98.36	61	0	1	142	202	1	60	4e-23	106	59
N.meningitidis_16S	SeqGr194862_1	1	96.88	64	1	1	142	205	1	63	4e-23	106	62
N.meningitidis_16S	SeqGr193213_1	1	96.88	64	1	1	142	205	1	63	4e-23	106	62
N.meningitidis_16S	SeqGr192965_4	4	98.36	61	0	1	142	202	1	60	4e-23	106	59
N.meningitidis_16S	SeqGr190955_1	1	96.88	64	1	1	142	205	1	63	4e-23	106	62
N.meningitidis_16S	SeqGr190675_3	3	98.36	61	0	1	142	202	1	60	4e-23	106	59
N.meningitidis_16S	SeqGr190285_1	1	96.88	64	1	1	142	205	1	63	4e-23	106	62
N.meningitidis_16S	SeqGr190123_1	1	96.88	64	1	1	142	205	1	63	4e-23	106	62
N.meningitidis_16S	SeqGr189875_1	1	96.88	64	1	1	142	205	1	63	4e-23	106	62
N.meningitidis_16S	SeqGr188812_1	1	96.88	64	1	1	142	205	1	63	4e-23	106	62
N.meningitidis_16S	SeqGr188449_1	1	98.36	61	0	1	142	202	1	60	4e-23	106	59
N.meningitidis_16S	SeqGr188016_1	1	96.88	64	1	1	142	205	1	63	4e-23	106	62
N.meningitidis_16S	SeqGr185690_1	1	96.88	64	1	1	142	205	1	63	4e-23	106	62
N.meningitidis_16S	SeqGr185202_1	1	96.88	64	0	2	142	205	1	62	4e-23	106	61
N.meningitidis_16S	SeqGr185087_1	1	96.88	64	1	1	142	205	1	63	4e-23	106	62
N.meningitidis_16S	SeqGr184866_1	1	96.88	64	1	1	142	205	1	63	4e-23	106	62
N.meningitidis_16S	SeqGr183209_1	1	96.88	64	1	1	142	205	1	63	4e-23	106	62
N.meningitidis_16S	SeqGr181219_1	1	96.88	64	1	1	142	205	1	63	4e-23	106	62
N.meningitidis_16S	SeqGr179665_1	1	96.88	64	1	1	142	205	1	63	4e-23	106	62
N.meningitidis_16S	SeqGr176366_1	1	96.88	64	1	1	142	205	1	63	4e-23	106	62
N.meningitidis_16S	SeqGr175939_1	1	96.88	64	1	1	142	205	1	63	4e-23	106	62
N.meningitidis_16S	SeqGr175426_1	1	96.88	64	1	1	142	205	1	63	4e-23	106	62
N.meningitidis_16S	SeqGr175160_1	1	96.88	64	1	1	142	205	1	63	4e-23	106	62
N.meningitidis_16S	SeqGr174313_1	1	96.88	64	1	1	142	205	1	63	4e-23	106	62
N.meningitidis_16S	SeqGr171126_1	1	98.36	61	0	1	145	205	1	60	4e-23	106	59
N.meningitidis_16S	SeqGr167946_1	1	96.88	64	1	1	142	205	1	63	4e-23	106	62
N.meningitidis_16S	SeqGr167792_1	1	96.88	64	1	1	142	205	1	63	4e-23	106	62
N.meningitidis_16S	SeqGr167738_1	1	96.88	64	1	1	142	205	1	63	4e-23	106	62
N.meningitidis_16S	SeqGr167036_1	1	96.88	64	1	1	142	205	1	63	4e-23	106	62
N.meningitidis_16S	SeqGr166838_1	1	96.88	64	1	1	142	205	1	63	4e-23	106	62
N.meningitidis_16S	SeqGr166538_1	1	96.88	64	1	1	142	205	1	63	4e-23	106	62
N.meningitidis_16S	SeqGr166513_1	1	96.88	64	1	1	142	205	1	63	4e-23	106	62
N.meningitidis_16S	SeqGr162974_1	1	96.88	64	1	1	142	205	1	63	4e-23	106	62
N.meningitidis_16S	SeqGr159640_1	1	96.88	64	1	1	142	205	1	63	4e-23	106	62
N.meningitidis_16S	SeqGr158902_1	1	96.88	64	1	1	142	205	1	63	4e-23	106	62
N.meningitidis_16S	SeqGr158022_1	1	96.88	64	1	1	142	205	1	63	4e-23	106	62
N.meningitidis_16S	SeqGr155584_1	1	96.88	64	1	1	142	205	1	63	4e-23	106	62
N.meningitidis_16S	SeqGr155124_1	1	96.88	64	1	1	142	205	1	63	4e-23	106	62
N.meningitidis_16S	SeqGr154777_1	1	96.88	64	1	1	142	205	1	63	4e-23	106	62
N.meningitidis_16S	SeqGr154204_1	1	96.88	64	1	1	142	205	1	63	4e-23	106	62
N.meningitidis_16S	SeqGr152372_1	1	96.88	64	1	1	142	205	1	63	4e-23	106	62
N.meningitidis_16S	SeqGr148668_1	1	96.88	64	1	1	142	205	1	63	4e-23	106	62
N.meningitidis_16S	SeqGr142455_1	1	96.88	64	1	1	142	205	1	63	4e-23	106	62
N.meningitidis_16S	SeqGr142198_1	1	96.88	64	1	1	142	205	1	63	4e-23	106	62
N.meningitidis_16S	SeqGr137962_1	1	96.88	64	1	1	142	205	1	63	4e-23	106	62
N.meningitidis_16S	SeqGr136825_1	1	96.88	64	1	1	142	205	1	63	4e-23	106	62
N.meningitidis_16S	SeqGr135787_1	1	96.88	64	1	1	142	205	1	63	4e-23	106	62
N.meningitidis_16S	SeqGr135100_1	1	98.36	61	0	1	142	202	1	60	4e-23	106	59
N.meningitidis_16S	SeqGr133828_1	1	96.88	64	1	1	142	205	1	63	4e-23	106	62
N.meningitidis_16S	SeqGr132048_8	8	98.36	61	0	1	142	202	1	60	4e-23	106	59
N.meningitidis_16S	SeqGr130773_1	1	96.88	64	1	1	142	205	1	63	4e-23	106	62
N.meningitidis_16S	SeqGr126963_1	1	98.36	61	0	1	145	205	1	60	4e-23	106	59
N.meningitidis_16S	SeqGr126743_1	1	96.88	64	1	1	142	205	1	63	4e-23	106	62
N.meningitidis_16S	SeqGr125575_1	1	96.88	64	1	1	142	205	1	63	4e-23	106	62
N.meningitidis_16S	SeqGr125305_1	1	96.88	64	1	1	142	205	1	63	4e-23	106	62
N.meningitidis_16S	SeqGr124006_1	1	96.88	64	1	1	142	205	1	63	4e-23	106	62
N.meningitidis_16S	SeqGr123768_1	1	98.36	61	0	1	142	202	1	60	4e-23	106	59
N.meningitidis_16S	SeqGr121983_1	1	96.88	64	1	1	142	205	1	63	4e-23	106	62
N.meningitidis_16S	SeqGr121816_1	1	96.88	64	1	1	142	205	1	63	4e-23	106	62
N.meningitidis_16S	SeqGr121307_1	1	96.88	64	1	1	142	205	1	63	4e-23	106	62
N.meningitidis_16S	SeqGr118396_1	1	96.88	64	1	1	142	205	1	63	4e-23	106	62
N.meningitidis_16S	SeqGr117737_1	1	96.88	64	1	1	142	205	1	63	4e-23	106	62
N.meningitidis_16S	SeqGr116996_1	1	96.88	64	1	1	142	205	1	63	4e-23	106	62
N.meningitidis_16S	SeqGr116409_1	1	96.88	64	1	1	142	205	1	63	4e-23	106	62
N.meningitidis_16S	SeqGr115369_1	1	96.88	64	1	1	142	205	1	63	4e-23	106	62
N.meningitidis_16S	SeqGr110352_1	1	95.45	66	3	0	1	66	18	83	4e-23	106	65
N.meningitidis_16S	SeqGr107381_1	1	96.88	64	1	1	142	205	1	63	4e-23	106	62
N.meningitidis_16S	SeqGr106880_1	1	96.88	64	1	1	142	205	1	63	4e-23	106	62
N.meningitidis_16S	SeqGr106447_1	1	96.88	64	1	1	142	205	1	63	4e-23	106	62
N.meningitidis_16S	SeqGr104820_1	1	96.88	64	1	1	142	205	1	63	4e-23	106	62
N.meningitidis_16S	SeqGr102114_1	1	96.88	64	1	1	142	205	1	63	4e-23	106	62
N.meningitidis_16S	SeqGr101977_1	1	96.88	64	1	1	142	205	1	63	4e-23	106	62
N.meningitidis_16S	SeqGr98097_1	1	96.88	64	1	1	142	205	1	63	4e-23	106	62
N.meningitidis_16S	SeqGr95759_1	1	96.88	64	1	1	142	205	1	63	4e-23	106	62
N.meningitidis_16S	SeqGr95596_1	1	96.88	64	1	1	142	205	1	63	4e-23	106	62
N.meningitidis_16S	SeqGr94478_1	1	96.88	64	1	1	142	205	1	63	4e-23	106	62
N.meningitidis_16S	SeqGr92347_1	1	96.88	64	1	1	142	205	1	63	4e-23	106	62
N.meningitidis_16S	SeqGr91903_1	1	96.88	64	1	1	142	205	1	63	4e-23	106	62
N.meningitidis_16S	SeqGr91126_1	1	96.88	64	1	1	142	205	1	63	4e-23	106	62
N.meningitidis_16S	SeqGr90983_1	1	96.88	64	1	1	142	205	1	63	4e-23	106	62
N.meningitidis_16S	SeqGr89956_1	1	96.88	64	1	1	142	205	1	63	4e-23	106	62
N.meningitidis_16S	SeqGr89361_1	1	96.88	64	1	1	142	205	1	63	4e-23	106	62
N.meningitidis_16S	SeqGr89301_1	1	96.88	64	1	1	142	205	1	63	4e-23	106	62
N.meningitidis_16S	SeqGr88552_1	1	96.88	64	1	1	142	205	1	63	4e-23	106	62
N.meningitidis_16S	SeqGr88504_1	1	96.88	64	1	1	142	205	1	63	4e-23	106	62
N.meningitidis_16S	SeqGr83613_1	1	96.88	64	1	1	142	205	1	63	4e-23	106	62
N.meningitidis_16S	SeqGr82088_1	1	96.88	64	1	1	142	205	1	63	4e-23	106	62
N.meningitidis_16S	SeqGr81208_1	1	96.88	64	1	1	142	205	1	63	4e-23	106	62
N.meningitidis_16S	SeqGr81124_1	1	98.36	61	0	1	142	202	1	60	4e-23	106	59
N.meningitidis_16S	SeqGr80154_1	1	96.88	64	1	1	142	205	1	63	4e-23	106	62
N.meningitidis_16S	SeqGr78393_1	1	96.88	64	1	1	142	205	1	63	4e-23	106	62
N.meningitidis_16S	SeqGr76852_1	1	96.88	64	1	1	142	205	1	63	4e-23	106	62
N.meningitidis_16S	SeqGr73378_1	1	96.88	64	1	1	142	205	1	63	4e-23	106	62
N.meningitidis_16S	SeqGr71505_1	1	96.88	64	1	1	142	205	1	63	4e-23	106	62
N.meningitidis_16S	SeqGr70879_1	1	96.88	64	1	1	142	205	1	63	4e-23	106	62
N.meningitidis_16S	SeqGr70460_1	1	96.88	64	1	1	142	205	1	63	4e-23	106	62
N.meningitidis_16S	SeqGr70364_1	1	96.88	64	1	1	142	205	1	63	4e-23	106	62
N.meningitidis_16S	SeqGr68803_1	1	96.88	64	1	1	142	205	1	63	4e-23	106	62
N.meningitidis_16S	SeqGr67508_1	1	96.88	64	1	1	142	205	1	63	4e-23	106	62
N.meningitidis_16S	SeqGr67486_1	1	96.88	64	1	1	142	205	1	63	4e-23	106	62
N.meningitidis_16S	SeqGr65840_1	1	96.88	64	1	1	142	205	1	63	4e-23	106	62
N.meningitidis_16S	SeqGr65071_1	1	96.88	64	1	1	142	205	1	63	4e-23	106	62
N.meningitidis_16S	SeqGr64246_1	1	96.88	64	1	1	142	205	1	63	4e-23	106	62
N.meningitidis_16S	SeqGr63621_10	10	98.36	61	0	1	142	202	1	60	4e-23	106	59
N.meningitidis_16S	SeqGr63575_1	1	96.88	64	1	1	142	205	1	63	4e-23	106	62
N.meningitidis_16S	SeqGr63321_1	1	96.88	64	1	1	142	205	1	63	4e-23	106	62
N.meningitidis_16S	SeqGr62777_1	1	96.88	64	1	1	142	205	1	63	4e-23	106	62
N.meningitidis_16S	SeqGr61392_1	1	96.88	64	1	1	142	205	1	63	4e-23	106	62
N.meningitidis_16S	SeqGr60660_1	1	98.36	61	0	1	145	205	4	63	4e-23	106	59
N.meningitidis_16S	SeqGr59801_1	1	96.88	64	1	1	142	205	1	63	4e-23	106	62
N.meningitidis_16S	SeqGr59339_1	1	96.88	64	1	1	142	205	1	63	4e-23	106	62
N.meningitidis_16S	SeqGr58198_1	1	96.88	64	1	1	142	205	1	63	4e-23	106	62
N.meningitidis_16S	SeqGr58180_1	1	96.88	64	1	1	142	205	1	63	4e-23	106	62
N.meningitidis_16S	SeqGr56572_1	1	96.88	64	1	1	142	205	1	63	4e-23	106	62
N.meningitidis_16S	SeqGr55327_1	1	96.88	64	1	1	142	205	1	63	4e-23	106	62
N.meningitidis_16S	SeqGr54141_1	1	96.88	64	1	1	142	205	1	63	4e-23	106	62
N.meningitidis_16S	SeqGr53976_1	1	96.88	64	1	1	142	205	1	63	4e-23	106	62
N.meningitidis_16S	SeqGr53971_1	1	96.88	64	1	1	142	205	1	63	4e-23	106	62
N.meningitidis_16S	SeqGr53932_1	1	96.88	64	1	1	142	205	1	63	4e-23	106	62
N.meningitidis_16S	SeqGr53332_1	1	96.88	64	1	1	142	205	1	63	4e-23	106	62
N.meningitidis_16S	SeqGr52692_4	4	98.36	61	0	1	142	202	1	60	4e-23	106	59
N.meningitidis_16S	SeqGr51196_2	2	98.36	61	0	1	142	202	1	60	4e-23	106	59
N.meningitidis_16S	SeqGr51141_1	1	96.88	64	1	1	142	205	1	63	4e-23	106	62
N.meningitidis_16S	SeqGr51117_1	1	96.88	64	1	1	142	205	1	63	4e-23	106	62
N.meningitidis_16S	SeqGr50363_1	1	96.88	64	1	1	142	205	1	63	4e-23	106	62
N.meningitidis_16S	SeqGr49768_1	1	96.88	64	1	1	142	205	1	63	4e-23	106	62
N.meningitidis_16S	SeqGr48278_1	1	96.88	64	1	1	142	205	1	63	4e-23	106	62
N.meningitidis_16S	SeqGr47817_1	1	96.88	64	1	1	142	205	1	63	4e-23	106	62
N.meningitidis_16S	SeqGr45878_1	1	96.88	64	1	1	142	205	1	63	4e-23	106	62
N.meningitidis_16S	SeqGr45765_1	1	96.88	64	1	1	142	205	1	63	4e-23	106	62
N.meningitidis_16S	SeqGr45554_1	1	96.88	64	1	1	142	205	1	63	4e-23	106	62
N.meningitidis_16S	SeqGr44317_1	1	96.88	64	1	1	142	205	1	63	4e-23	106	62
N.meningitidis_16S	SeqGr43062_1	1	96.88	64	1	1	142	205	1	63	4e-23	106	62
N.meningitidis_16S	SeqGr42559_1	1	96.88	64	1	1	142	205	1	63	4e-23	106	62
N.meningitidis_16S	SeqGr42035_1	1	96.88	64	1	1	142	205	1	63	4e-23	106	62
N.meningitidis_16S	SeqGr41504_1	1	96.88	64	1	1	142	205	1	63	4e-23	106	62
N.meningitidis_16S	SeqGr40722_1	1	96.88	64	1	1	142	205	1	63	4e-23	106	62
N.meningitidis_16S	SeqGr40519_1	1	96.88	64	1	1	142	205	1	63	4e-23	106	62
N.meningitidis_16S	SeqGr39352_1	1	96.88	64	1	1	142	205	1	63	4e-23	106	62
N.meningitidis_16S	SeqGr38514_1	1	96.88	64	1	1	142	205	1	63	4e-23	106	62
N.meningitidis_16S	SeqGr38198_1	1	98.36	61	0	1	145	205	1	60	4e-23	106	59
N.meningitidis_16S	SeqGr35884_1	1	96.88	64	1	1	142	205	1	63	4e-23	106	62
N.meningitidis_16S	SeqGr33587_1	1	96.88	64	1	1	142	205	1	63	4e-23	106	62
N.meningitidis_16S	SeqGr31943_1	1	98.36	61	0	1	142	202	1	60	4e-23	106	59
N.meningitidis_16S	SeqGr31753_1	1	96.88	64	1	1	142	205	1	63	4e-23	106	62
N.meningitidis_16S	SeqGr30938_1	1	98.36	61	0	1	142	202	1	60	4e-23	106	59
N.meningitidis_16S	SeqGr29965_1	1	96.88	64	1	1	142	205	1	63	4e-23	106	62
N.meningitidis_16S	SeqGr29573_1	1	98.36	61	0	1	145	205	1	60	4e-23	106	59
N.meningitidis_16S	SeqGr28852_1	1	96.88	64	1	1	142	205	1	63	4e-23	106	62
N.meningitidis_16S	SeqGr28693_1	1	96.88	64	1	1	142	205	1	63	4e-23	106	62
N.meningitidis_16S	SeqGr27177_1	1	96.88	64	1	1	142	205	1	63	4e-23	106	62
N.meningitidis_16S	SeqGr24917_1	1	96.88	64	1	1	142	205	1	63	4e-23	106	62
N.meningitidis_16S	SeqGr24407_1	1	98.36	61	0	1	145	205	1	60	4e-23	106	59
N.meningitidis_16S	SeqGr23975_1	1	96.88	64	1	1	142	205	1	63	4e-23	106	62
N.meningitidis_16S	SeqGr22192_1	1	96.88	64	1	1	142	205	1	63	4e-23	106	62
N.meningitidis_16S	SeqGr16323_1	1	98.36	61	0	1	143	203	1	60	4e-23	106	59
N.meningitidis_16S	SeqGr14489_1	1	96.88	64	1	1	142	205	1	63	4e-23	106	62
N.meningitidis_16S	SeqGr12892_1	1	96.88	64	1	1	142	205	1	63	4e-23	106	62
N.meningitidis_16S	SeqGr6042_1	1	96.88	64	1	1	142	205	1	63	4e-23	106	62
N.meningitidis_16S	SeqGr3975_1	1	96.88	64	1	1	142	205	1	63	4e-23	106	62
N.meningitidis_16S	SeqGr3706_1	1	96.88	64	1	1	142	205	1	63	4e-23	106	62
N.meningitidis_16S	SeqGr1954_1	1	96.88	64	1	1	142	205	1	63	4e-23	106	62
N.meningitidis_16S	SeqGr694_1	1	96.88	64	1	1	142	205	1	63	4e-23	106	62
N.meningitidis_16S	SeqGr209_1	1	96.88	64	1	1	142	205	1	63	4e-23	106	62
N.meningitidis_16S	SeqGr529488_1	1	96.83	63	1	1	142	204	1	62	1e-22	104	61
N.meningitidis_16S	SeqGr526723_1	1	96.83	63	1	1	143	205	1	62	1e-22	104	61
N.meningitidis_16S	SeqGr511957_1	1	96.83	63	1	1	142	204	1	62	1e-22	104	61
N.meningitidis_16S	SeqGr503134_1	1	96.83	63	1	1	143	205	1	62	1e-22	104	61
N.meningitidis_16S	SeqGr494727_1	1	96.83	63	1	1	143	205	1	62	1e-22	104	61
N.meningitidis_16S	SeqGr489530_1	1	96.83	63	1	1	143	205	1	62	1e-22	104	61
N.meningitidis_16S	SeqGr486415_1	1	98.33	60	0	1	146	205	1	59	1e-22	104	58
N.meningitidis_16S	SeqGr475658_1	1	96.83	63	1	1	143	205	1	62	1e-22	104	61
N.meningitidis_16S	SeqGr473962_1	1	96.83	63	1	1	142	204	1	62	1e-22	104	61
N.meningitidis_16S	SeqGr471345_1	1	96.83	63	1	1	142	204	1	62	1e-22	104	61
N.meningitidis_16S	SeqGr468478_1	1	96.83	63	1	1	142	204	1	62	1e-22	104	61
N.meningitidis_16S	SeqGr465310_1	1	96.83	63	1	1	142	204	1	62	1e-22	104	61
N.meningitidis_16S	SeqGr461113_1	1	96.83	63	1	1	142	204	1	62	1e-22	104	61
N.meningitidis_16S	SeqGr461073_1	1	96.83	63	1	1	142	204	1	62	1e-22	104	61
N.meningitidis_16S	SeqGr456338_1	1	96.83	63	1	1	143	205	1	62	1e-22	104	61
N.meningitidis_16S	SeqGr452417_1	1	98.33	60	0	1	144	203	1	59	1e-22	104	58
N.meningitidis_16S	SeqGr424665_1	1	96.83	63	1	1	142	204	1	62	1e-22	104	61
N.meningitidis_16S	SeqGr421504_1	1	96.83	63	1	1	143	205	1	62	1e-22	104	61
N.meningitidis_16S	SeqGr414199_1	1	95.38	65	3	0	1	65	37	101	1e-22	104	64
N.meningitidis_16S	SeqGr403224_1	1	96.83	63	1	1	142	204	1	62	1e-22	104	61
N.meningitidis_16S	SeqGr377823_1	1	96.83	63	1	1	142	204	1	62	1e-22	104	61
N.meningitidis_16S	SeqGr376597_1	1	96.83	63	1	1	143	205	1	62	1e-22	104	61
N.meningitidis_16S	SeqGr372176_1	1	96.83	63	1	1	142	204	1	62	1e-22	104	61
N.meningitidis_16S	SeqGr355299_1	1	96.83	63	1	1	142	204	1	62	1e-22	104	61
N.meningitidis_16S	SeqGr349548_1	1	96.83	63	1	1	143	205	1	62	1e-22	104	61
N.meningitidis_16S	SeqGr346191_1	1	96.83	63	1	1	143	205	1	62	1e-22	104	61
N.meningitidis_16S	SeqGr336983_1	1	96.83	63	1	1	143	205	1	62	1e-22	104	61
N.meningitidis_16S	SeqGr317942_1	1	100	56	0	0	83	138	1	56	1e-22	104	55
N.meningitidis_16S	SeqGr315910_1	1	96.83	63	1	1	142	204	1	62	1e-22	104	61
N.meningitidis_16S	SeqGr311539_1	1	96.83	63	1	1	143	205	1	62	1e-22	104	61
N.meningitidis_16S	SeqGr309100_1	1	96.83	63	1	1	143	205	1	62	1e-22	104	61
N.meningitidis_16S	SeqGr297255_1	1	96.83	63	1	1	142	204	1	62	1e-22	104	61
N.meningitidis_16S	SeqGr275842_1	1	96.83	63	1	1	142	204	1	62	1e-22	104	61
N.meningitidis_16S	SeqGr272001_1	1	96.83	63	1	1	142	204	1	62	1e-22	104	61
N.meningitidis_16S	SeqGr249526_1	1	96.83	63	1	1	143	205	1	62	1e-22	104	61
N.meningitidis_16S	SeqGr240912_1	1	96.83	63	1	1	142	204	1	62	1e-22	104	61
N.meningitidis_16S	SeqGr239930_1	1	96.83	63	1	1	142	204	1	62	1e-22	104	61
N.meningitidis_16S	SeqGr229413_1	1	96.83	63	1	1	142	204	1	62	1e-22	104	61
N.meningitidis_16S	SeqGr212619_1	1	96.83	63	1	1	142	204	1	62	1e-22	104	61
N.meningitidis_16S	SeqGr204738_1	1	96.83	63	1	1	143	205	1	62	1e-22	104	61
N.meningitidis_16S	SeqGr204233_1	1	98.33	60	0	1	146	205	1	59	1e-22	104	58
N.meningitidis_16S	SeqGr191129_1	1	96.83	63	1	1	143	205	1	62	1e-22	104	61
N.meningitidis_16S	SeqGr180586_1	1	96.83	63	1	1	143	205	1	62	1e-22	104	61
N.meningitidis_16S	SeqGr176436_1	1	96.83	63	1	1	143	205	1	62	1e-22	104	61
N.meningitidis_16S	SeqGr168843_1	1	96.83	63	1	1	142	204	1	62	1e-22	104	61
N.meningitidis_16S	SeqGr160233_1	1	96.83	63	1	1	143	205	1	62	1e-22	104	61
N.meningitidis_16S	SeqGr155597_1	1	96.83	63	1	1	142	204	1	62	1e-22	104	61
N.meningitidis_16S	SeqGr155248_1	1	96.83	63	1	1	143	205	1	62	1e-22	104	61
N.meningitidis_16S	SeqGr154563_1	1	96.83	63	1	1	143	205	1	62	1e-22	104	61
N.meningitidis_16S	SeqGr154385_1	1	96.83	63	1	1	143	205	1	62	1e-22	104	61
N.meningitidis_16S	SeqGr153755_1	1	96.83	63	1	1	143	205	1	62	1e-22	104	61
N.meningitidis_16S	SeqGr148572_1	1	96.83	63	1	1	143	205	1	62	1e-22	104	61
N.meningitidis_16S	SeqGr135651_1	1	95.38	65	3	0	1	65	37	101	1e-22	104	64
N.meningitidis_16S	SeqGr128676_1	1	98.33	60	0	1	142	201	1	59	1e-22	104	58
N.meningitidis_16S	SeqGr108462_1	1	98.33	60	0	1	142	201	1	59	1e-22	104	58
N.meningitidis_16S	SeqGr100661_1	1	96.83	63	1	1	143	205	1	62	1e-22	104	61
N.meningitidis_16S	SeqGr84863_1	1	96.83	63	1	1	143	205	1	62	1e-22	104	61
N.meningitidis_16S	SeqGr79315_1	1	100	56	0	0	85	140	1	56	1e-22	104	55
N.meningitidis_16S	SeqGr79040_1	1	96.83	63	1	1	143	205	1	62	1e-22	104	61
N.meningitidis_16S	SeqGr75078_1	1	96.83	63	1	1	142	204	1	62	1e-22	104	61
N.meningitidis_16S	SeqGr74101_1	1	96.83	63	1	1	143	205	1	62	1e-22	104	61
N.meningitidis_16S	SeqGr65225_1	1	96.83	63	1	1	143	205	1	62	1e-22	104	61
N.meningitidis_16S	SeqGr57819_1	1	96.83	63	1	1	142	204	1	62	1e-22	104	61
N.meningitidis_16S	SeqGr51875_1	1	98.33	60	0	1	146	205	4	62	1e-22	104	58
N.meningitidis_16S	SeqGr45118_1	1	96.83	63	1	1	142	204	1	62	1e-22	104	61
N.meningitidis_16S	SeqGr44899_1	1	95.38	65	3	0	1	65	37	101	1e-22	104	64
N.meningitidis_16S	SeqGr42943_4	4	98.33	60	0	1	142	201	1	59	1e-22	104	58
N.meningitidis_16S	SeqGr27911_1	1	96.83	63	1	1	142	204	1	62	1e-22	104	61
N.meningitidis_16S	SeqGr17081_1	1	96.83	63	1	1	143	205	1	62	1e-22	104	61
N.meningitidis_16S	SeqGr7034_2	2	98.33	60	0	1	142	201	1	59	1e-22	104	58
N.meningitidis_16S	SeqGr1368_1	1	96.83	63	1	1	142	204	1	62	1e-22	104	61
N.meningitidis_16S	SeqGr617_1	1	95.38	65	3	0	1	65	37	101	1e-22	104	64
N.meningitidis_16S	SeqGr520951_1	1	91.78	73	6	0	69	141	1	73	5e-22	102	72
N.meningitidis_16S	SeqGr489312_1	1	98.31	59	0	1	142	200	1	58	5e-22	102	57
N.meningitidis_16S	SeqGr379609_1	1	98.31	59	0	1	144	202	1	58	5e-22	102	57
N.meningitidis_16S	SeqGr355664_1	1	96.72	61	2	0	66	126	1	61	5e-22	102	60
N.meningitidis_16S	SeqGr351948_1	1	96.77	62	1	1	144	205	1	61	5e-22	102	60
N.meningitidis_16S	SeqGr349070_1	1	98.31	59	0	1	147	205	1	58	5e-22	102	57
N.meningitidis_16S	SeqGr314315_1	1	100	55	0	0	87	141	1	55	5e-22	102	54
N.meningitidis_16S	SeqGr243109_1	1	98.31	59	0	1	142	200	1	58	5e-22	102	57
N.meningitidis_16S	SeqGr214508_1	1	98.31	59	0	1	142	200	1	58	5e-22	102	57
N.meningitidis_16S	SeqGr135755_1	1	98.31	59	0	1	147	205	1	58	5e-22	102	57
N.meningitidis_16S	SeqGr135041_1	1	96.77	62	1	1	143	204	1	61	5e-22	102	60
N.meningitidis_16S	SeqGr127482_1	1	96.77	62	1	1	142	203	1	61	5e-22	102	60
N.meningitidis_16S	SeqGr120898_1	1	95.31	64	3	0	1	64	38	101	5e-22	102	63
N.meningitidis_16S	SeqGr113714_1	1	98.31	59	0	1	142	200	1	58	5e-22	102	57
N.meningitidis_16S	SeqGr28544_1	1	95.31	64	3	0	1	64	23	86	5e-22	102	63
N.meningitidis_16S	SeqGr10180_3	3	98.31	59	0	1	142	200	1	58	5e-22	102	57
N.meningitidis_16S	SeqGr533291_1	1	95.31	64	2	1	142	205	1	63	2e-21	100	62
N.meningitidis_16S	SeqGr533259_1	1	95.31	64	2	1	142	205	1	63	2e-21	100	62
N.meningitidis_16S	SeqGr529925_1	1	95.31	64	2	1	142	205	1	63	2e-21	100	62
N.meningitidis_16S	SeqGr523030_1	1	95.31	64	2	1	142	205	1	63	2e-21	100	62
N.meningitidis_16S	SeqGr519888_1	1	96.72	61	1	1	145	205	1	60	2e-21	100	59
N.meningitidis_16S	SeqGr517003_1	1	95.31	64	2	1	142	205	1	63	2e-21	100	62
N.meningitidis_16S	SeqGr516996_1	1	95.31	64	2	1	142	205	1	63	2e-21	100	62
N.meningitidis_16S	SeqGr511166_1	1	95.31	64	2	1	142	205	1	63	2e-21	100	62
N.meningitidis_16S	SeqGr505374_1	1	95.31	64	2	1	142	205	1	63	2e-21	100	62
N.meningitidis_16S	SeqGr501909_1	1	95.31	64	2	1	142	205	1	63	2e-21	100	62
N.meningitidis_16S	SeqGr501886_1	1	95.31	64	2	1	142	205	1	63	2e-21	100	62
N.meningitidis_16S	SeqGr500100_1	1	96.72	61	1	1	142	202	1	60	2e-21	100	59
N.meningitidis_16S	SeqGr499027_1	1	95.31	64	2	1	142	205	1	63	2e-21	100	62
N.meningitidis_16S	SeqGr495902_1	1	95.31	64	2	1	142	205	1	63	2e-21	100	62
N.meningitidis_16S	SeqGr486105_1	1	95.31	64	2	1	142	205	1	63	2e-21	100	62
N.meningitidis_16S	SeqGr484603_1	1	98.28	58	0	1	142	199	1	57	2e-21	100	56
N.meningitidis_16S	SeqGr478098_1	1	96.72	61	1	1	142	202	1	60	2e-21	100	59
N.meningitidis_16S	SeqGr477874_1	1	95.31	64	2	1	142	205	1	63	2e-21	100	62
N.meningitidis_16S	SeqGr475113_1	1	95.24	63	3	0	1	63	39	101	2e-21	100	62
N.meningitidis_16S	SeqGr465826_1	1	95.31	64	2	1	142	205	1	63	2e-21	100	62
N.meningitidis_16S	SeqGr464617_1	1	95.24	63	3	0	1	63	39	101	2e-21	100	62
N.meningitidis_16S	SeqGr463412_1	1	95.31	64	2	1	142	205	1	63	2e-21	100	62
N.meningitidis_16S	SeqGr462309_1	1	95.31	64	2	1	142	205	1	63	2e-21	100	62
N.meningitidis_16S	SeqGr460865_1	1	96.72	61	1	1	142	202	1	60	2e-21	100	59
N.meningitidis_16S	SeqGr457136_1	1	95.31	64	2	1	142	205	1	63	2e-21	100	62
N.meningitidis_16S	SeqGr450521_1	1	95.31	64	2	1	142	205	1	63	2e-21	100	62
N.meningitidis_16S	SeqGr449193_1	1	95.31	64	2	1	142	205	1	63	2e-21	100	62
N.meningitidis_16S	SeqGr449179_1	1	95.31	64	2	1	142	205	1	63	2e-21	100	62
N.meningitidis_16S	SeqGr445645_1	1	96.72	61	1	1	142	202	1	60	2e-21	100	59
N.meningitidis_16S	SeqGr444354_1	1	95.31	64	2	1	142	205	1	63	2e-21	100	62
N.meningitidis_16S	SeqGr439256_1	1	95.24	63	3	0	1	63	23	85	2e-21	100	62
N.meningitidis_16S	SeqGr438769_1	1	95.31	64	2	1	142	205	1	63	2e-21	100	62
N.meningitidis_16S	SeqGr437954_1	1	95.31	64	2	1	142	205	1	63	2e-21	100	62
N.meningitidis_16S	SeqGr437503_1	1	95.31	64	2	1	142	205	1	63	2e-21	100	62
N.meningitidis_16S	SeqGr437458_1	1	96.72	61	1	1	142	202	1	60	2e-21	100	59
N.meningitidis_16S	SeqGr434358_1	1	95.31	64	2	1	142	205	1	63	2e-21	100	62
N.meningitidis_16S	SeqGr432720_1	1	95.31	64	2	1	142	205	1	63	2e-21	100	62
N.meningitidis_16S	SeqGr430793_1	1	98.28	58	0	1	145	202	1	57	2e-21	100	56
N.meningitidis_16S	SeqGr427726_1	1	95.31	64	2	1	142	205	1	63	2e-21	100	62
N.meningitidis_16S	SeqGr427196_1	1	96.72	61	1	1	142	202	1	60	2e-21	100	59
N.meningitidis_16S	SeqGr424438_1	1	95.31	64	2	1	142	205	1	63	2e-21	100	62
N.meningitidis_16S	SeqGr423202_1	1	95.31	64	2	1	142	205	1	63	2e-21	100	62
N.meningitidis_16S	SeqGr423056_1	1	95.31	64	2	1	142	205	1	63	2e-21	100	62
N.meningitidis_16S	SeqGr421423_1	1	95.31	64	2	1	142	205	1	63	2e-21	100	62
N.meningitidis_16S	SeqGr416171_1	1	95.31	64	2	1	142	205	1	63	2e-21	100	62
N.meningitidis_16S	SeqGr409266_1	1	96.72	61	1	1	142	202	1	60	2e-21	100	59
N.meningitidis_16S	SeqGr401591_1	1	95.31	64	2	1	142	205	1	63	2e-21	100	62
N.meningitidis_16S	SeqGr385295_1	1	95.31	64	2	1	142	205	1	63	2e-21	100	62
N.meningitidis_16S	SeqGr377042_1	1	95.31	64	2	1	142	205	1	63	2e-21	100	62
N.meningitidis_16S	SeqGr369405_1	1	95.31	64	2	1	142	205	1	63	2e-21	100	62
N.meningitidis_16S	SeqGr364192_1	1	95.31	64	2	1	142	205	1	63	2e-21	100	62
N.meningitidis_16S	SeqGr362866_1	1	95.31	64	2	1	142	205	1	63	2e-21	100	62
N.meningitidis_16S	SeqGr361853_1	1	95.31	64	2	1	142	205	1	63	2e-21	100	62
N.meningitidis_16S	SeqGr361836_1	1	95.31	64	2	1	142	205	1	63	2e-21	100	62
N.meningitidis_16S	SeqGr361808_1	1	95.31	64	2	1	142	205	1	63	2e-21	100	62
N.meningitidis_16S	SeqGr357168_1	1	96.72	61	1	1	142	202	1	60	2e-21	100	59
N.meningitidis_16S	SeqGr356533_1	1	95.31	64	2	1	142	205	1	63	2e-21	100	62
N.meningitidis_16S	SeqGr354376_1	1	95.31	64	2	1	142	205	1	63	2e-21	100	62
N.meningitidis_16S	SeqGr351113_1	1	96.72	61	1	1	145	205	1	60	2e-21	100	59
N.meningitidis_16S	SeqGr351048_1	1	95.31	64	2	1	142	205	1	63	2e-21	100	62
N.meningitidis_16S	SeqGr349453_1	1	95.31	64	2	1	142	205	1	63	2e-21	100	62
N.meningitidis_16S	SeqGr343645_1	1	95.31	64	2	1	142	205	1	63	2e-21	100	62
N.meningitidis_16S	SeqGr340456_1	1	95.31	64	2	1	142	205	1	63	2e-21	100	62
N.meningitidis_16S	SeqGr339437_1	1	95.31	64	2	1	142	205	1	63	2e-21	100	62
N.meningitidis_16S	SeqGr334702_1	1	95.31	64	2	1	142	205	1	63	2e-21	100	62
N.meningitidis_16S	SeqGr332191_1	1	95.31	64	2	1	142	205	1	63	2e-21	100	62
N.meningitidis_16S	SeqGr327836_1	1	95.31	64	2	1	142	205	1	63	2e-21	100	62
N.meningitidis_16S	SeqGr324848_1	1	95.31	64	2	1	142	205	1	63	2e-21	100	62
N.meningitidis_16S	SeqGr323076_1	1	95.31	64	2	1	142	205	1	63	2e-21	100	62
N.meningitidis_16S	SeqGr323036_1	1	95.31	64	2	1	142	205	1	63	2e-21	100	62
N.meningitidis_16S	SeqGr322624_1	1	95.31	64	2	1	142	205	1	63	2e-21	100	62
N.meningitidis_16S	SeqGr312432_1	1	95.31	64	2	1	142	205	1	63	2e-21	100	62
N.meningitidis_16S	SeqGr312329_1	1	95.31	64	2	1	142	205	1	63	2e-21	100	62
N.meningitidis_16S	SeqGr303455_1	1	95.31	64	2	1	142	205	1	63	2e-21	100	62
N.meningitidis_16S	SeqGr302502_1	1	95.31	64	2	1	142	205	1	63	2e-21	100	62
N.meningitidis_16S	SeqGr300580_1	1	95.31	64	2	1	142	205	1	63	2e-21	100	62
N.meningitidis_16S	SeqGr297388_1	1	96.72	61	1	1	142	202	1	60	2e-21	100	59
N.meningitidis_16S	SeqGr283643_1	1	95.31	64	2	1	142	205	1	63	2e-21	100	62
N.meningitidis_16S	SeqGr283055_1	1	95.31	64	2	1	142	205	1	63	2e-21	100	62
N.meningitidis_16S	SeqGr266109_1	1	95.31	64	2	1	142	205	1	63	2e-21	100	62
N.meningitidis_16S	SeqGr258147_1	1	96.72	61	1	1	142	202	1	60	2e-21	100	59
N.meningitidis_16S	SeqGr247658_1	1	96.72	61	1	1	145	205	1	60	2e-21	100	59
N.meningitidis_16S	SeqGr247529_1	1	95.31	64	2	1	142	205	1	63	2e-21	100	62
N.meningitidis_16S	SeqGr241962_1	1	96.72	61	0	2	142	202	1	59	2e-21	100	58
N.meningitidis_16S	SeqGr241635_1	1	98.28	58	0	1	142	199	1	57	2e-21	100	56
N.meningitidis_16S	SeqGr241612_1	1	95.31	64	2	1	142	205	1	63	2e-21	100	62
N.meningitidis_16S	SeqGr240753_1	1	95.31	64	2	1	142	205	1	63	2e-21	100	62
N.meningitidis_16S	SeqGr237688_1	1	95.31	64	2	1	142	205	1	63	2e-21	100	62
N.meningitidis_16S	SeqGr234068_1	1	96.72	61	1	1	142	202	1	60	2e-21	100	59
N.meningitidis_16S	SeqGr227243_1	1	95.31	64	2	1	142	205	1	63	2e-21	100	62
N.meningitidis_16S	SeqGr226494_1	1	95.24	63	3	0	1	63	23	85	2e-21	100	62
N.meningitidis_16S	SeqGr225249_1	1	95.24	63	3	0	1	63	23	85	2e-21	100	62
N.meningitidis_16S	SeqGr222532_3	3	98.28	58	0	1	142	199	1	57	2e-21	100	56
N.meningitidis_16S	SeqGr215212_1	1	95.31	64	2	1	142	205	1	63	2e-21	100	62
N.meningitidis_16S	SeqGr213410_1	1	95.31	64	2	1	142	205	1	63	2e-21	100	62
N.meningitidis_16S	SeqGr213335_1	1	95.31	64	2	1	142	205	1	63	2e-21	100	62
N.meningitidis_16S	SeqGr212592_1	1	95.31	64	2	1	142	205	1	63	2e-21	100	62
N.meningitidis_16S	SeqGr208315_1	1	100	54	0	0	85	138	1	54	2e-21	100	53
N.meningitidis_16S	SeqGr207644_1	1	95.31	64	2	1	142	205	1	63	2e-21	100	62
N.meningitidis_16S	SeqGr202361_1	1	95.31	64	2	1	142	205	1	63	2e-21	100	62
N.meningitidis_16S	SeqGr199356_1	1	95.31	64	2	1	142	205	1	63	2e-21	100	62
N.meningitidis_16S	SeqGr188263_1	1	95.31	64	2	1	142	205	1	63	2e-21	100	62
N.meningitidis_16S	SeqGr184388_1	1	95.31	64	2	1	142	205	1	63	2e-21	100	62
N.meningitidis_16S	SeqGr174499_1	1	95.31	64	2	1	142	205	1	63	2e-21	100	62
N.meningitidis_16S	SeqGr165431_1	1	95.31	64	2	1	142	205	1	63	2e-21	100	62
N.meningitidis_16S	SeqGr165321_1	1	95.31	64	2	1	142	205	1	63	2e-21	100	62
N.meningitidis_16S	SeqGr155689_1	1	95.31	64	2	1	142	205	1	63	2e-21	100	62
N.meningitidis_16S	SeqGr149774_1	1	95.31	64	2	1	142	205	1	63	2e-21	100	62
N.meningitidis_16S	SeqGr137742_1	1	95.31	64	2	1	142	205	1	63	2e-21	100	62
N.meningitidis_16S	SeqGr136370_1	1	95.31	64	2	1	142	205	1	63	2e-21	100	62
N.meningitidis_16S	SeqGr130085_1	1	95.31	64	2	1	142	205	1	63	2e-21	100	62
N.meningitidis_16S	SeqGr126400_1	1	100	54	0	0	87	140	1	54	2e-21	100	53
N.meningitidis_16S	SeqGr124244_1	1	96.72	61	1	1	142	202	1	60	2e-21	100	59
N.meningitidis_16S	SeqGr121134_1	1	95.31	64	2	1	142	205	1	63	2e-21	100	62
N.meningitidis_16S	SeqGr114505_1	1	95.31	64	2	1	142	205	1	63	2e-21	100	62
N.meningitidis_16S	SeqGr104583_1	1	95.31	64	2	1	142	205	1	63	2e-21	100	62
N.meningitidis_16S	SeqGr103023_1	1	98.25	57	1	0	98	154	1	57	2e-21	100	56
N.meningitidis_16S	SeqGr100007_3	3	98.28	58	0	1	142	199	1	57	2e-21	100	56
N.meningitidis_16S	SeqGr96697_11	11	98.28	58	0	1	142	199	1	57	2e-21	100	56
N.meningitidis_16S	SeqGr95865_1	1	95.31	64	2	1	142	205	1	63	2e-21	100	62
N.meningitidis_16S	SeqGr94238_1	1	95.31	64	2	1	142	205	1	63	2e-21	100	62
N.meningitidis_16S	SeqGr88298_1	1	95.31	64	2	1	142	205	1	63	2e-21	100	62
N.meningitidis_16S	SeqGr79188_1	1	95.31	64	2	1	142	205	1	63	2e-21	100	62
N.meningitidis_16S	SeqGr75161_1	1	95.31	64	2	1	142	205	1	63	2e-21	100	62
N.meningitidis_16S	SeqGr73580_1	1	95.31	64	2	1	142	205	1	63	2e-21	100	62
N.meningitidis_16S	SeqGr68109_1	1	95.31	64	2	1	142	205	1	63	2e-21	100	62
N.meningitidis_16S	SeqGr66518_1	1	95.31	64	2	1	142	205	1	63	2e-21	100	62
N.meningitidis_16S	SeqGr60481_1	1	96.72	61	1	1	142	202	1	60	2e-21	100	59
N.meningitidis_16S	SeqGr55057_1	1	95.31	64	2	1	142	205	1	63	2e-21	100	62
N.meningitidis_16S	SeqGr52432_1	1	95.31	64	2	1	142	205	1	63	2e-21	100	62
N.meningitidis_16S	SeqGr51574_1	1	95.31	64	2	1	142	205	1	63	2e-21	100	62
N.meningitidis_16S	SeqGr43842_1	1	95.31	64	2	1	142	205	1	63	2e-21	100	62
N.meningitidis_16S	SeqGr41475_1	1	95.31	64	2	1	142	205	1	63	2e-21	100	62
N.meningitidis_16S	SeqGr40984_1	1	95.31	64	2	1	142	205	1	63	2e-21	100	62
N.meningitidis_16S	SeqGr35529_5	5	98.28	58	0	1	142	199	1	57	2e-21	100	56
N.meningitidis_16S	SeqGr22538_1	1	95.31	64	2	1	142	205	1	63	2e-21	100	62
N.meningitidis_16S	SeqGr21722_1	1	95.31	64	2	1	142	205	1	63	2e-21	100	62
N.meningitidis_16S	SeqGr20063_1	1	95.31	64	2	1	142	205	1	63	2e-21	100	62
N.meningitidis_16S	SeqGr18343_1	1	95.24	63	3	0	1	63	39	101	2e-21	100	62
N.meningitidis_16S	SeqGr13134_1	1	98.28	58	0	1	148	205	1	57	2e-21	100	56
N.meningitidis_16S	SeqGr533083_1	1	95.24	63	2	1	142	204	1	62	6e-21	99	61
N.meningitidis_16S	SeqGr496582_1	1	95.24	63	2	1	142	204	1	62	6e-21	99	61
N.meningitidis_16S	SeqGr494844_1	1	98.25	57	0	1	149	205	1	56	6e-21	99	55
N.meningitidis_16S	SeqGr487177_1	1	98.25	57	0	1	149	205	1	56	6e-21	99	55
N.meningitidis_16S	SeqGr485575_1	1	95.24	63	2	1	142	204	1	62	6e-21	99	61
N.meningitidis_16S	SeqGr484895_1	1	95.31	64	0	2	142	205	1	61	6e-21	99	60
N.meningitidis_16S	SeqGr480455_1	1	98.25	57	0	1	149	205	1	56	6e-21	99	55
N.meningitidis_16S	SeqGr478267_1	1	95.24	63	2	1	142	204	1	62	6e-21	99	61
N.meningitidis_16S	SeqGr466225_1	1	95.24	63	2	1	142	204	1	62	6e-21	99	61
N.meningitidis_16S	SeqGr439334_1	1	98.25	57	0	1	142	198	1	56	6e-21	99	55
N.meningitidis_16S	SeqGr410834_1	1	98.25	57	0	1	148	204	1	56	6e-21	99	55
N.meningitidis_16S	SeqGr401736_1	1	100	53	0	0	86	138	31	83	6e-21	99	52
N.meningitidis_16S	SeqGr401661_1	1	95.16	62	3	0	1	62	37	98	6e-21	99	61
N.meningitidis_16S	SeqGr384235_1	1	95.24	63	2	1	142	204	1	62	6e-21	99	61
N.meningitidis_16S	SeqGr369987_1	1	95.24	63	2	1	142	204	1	62	6e-21	99	61
N.meningitidis_16S	SeqGr366412_1	1	96.67	60	1	1	145	204	4	62	6e-21	99	58
N.meningitidis_16S	SeqGr359987_1	1	93.85	65	4	0	1	65	37	101	6e-21	99	64
N.meningitidis_16S	SeqGr354977_1	1	95.24	63	2	1	143	205	1	62	6e-21	99	61
N.meningitidis_16S	SeqGr328610_1	1	95.24	63	2	1	142	204	1	62	6e-21	99	61
N.meningitidis_16S	SeqGr282019_1	1	100	53	0	0	84	136	1	53	6e-21	99	52
N.meningitidis_16S	SeqGr281377_1	1	93.85	65	4	0	1	65	37	101	6e-21	99	64
N.meningitidis_16S	SeqGr275634_1	1	95.24	63	2	1	143	205	1	62	6e-21	99	61
N.meningitidis_16S	SeqGr269366_1	1	95.16	62	3	0	1	62	39	100	6e-21	99	61
N.meningitidis_16S	SeqGr248878_1	1	98.25	57	0	1	142	198	1	56	6e-21	99	55
N.meningitidis_16S	SeqGr247688_2	2	100	53	0	0	89	141	1	53	6e-21	99	52
N.meningitidis_16S	SeqGr215446_1	1	98.25	57	0	1	142	198	1	56	6e-21	99	55
N.meningitidis_16S	SeqGr182735_1	1	95.24	63	2	1	142	204	1	62	6e-21	99	61
N.meningitidis_16S	SeqGr174096_1	1	96.67	60	1	1	142	201	1	59	6e-21	99	58
N.meningitidis_16S	SeqGr173979_1	1	95.16	62	3	0	1	62	38	99	6e-21	99	61
N.meningitidis_16S	SeqGr164468_1	1	100	53	0	0	88	140	1	53	6e-21	99	52
N.meningitidis_16S	SeqGr150987_7	7	98.25	57	0	1	142	198	1	56	6e-21	99	55
N.meningitidis_16S	SeqGr121774_1	1	95.24	63	2	1	142	204	1	62	6e-21	99	61
N.meningitidis_16S	SeqGr118139_1	1	98.25	57	0	1	142	198	1	56	6e-21	99	55
N.meningitidis_16S	SeqGr115637_1	1	98.25	57	0	1	142	198	1	56	6e-21	99	55
N.meningitidis_16S	SeqGr91690_1	1	95.24	63	2	1	142	204	1	62	6e-21	99	61
N.meningitidis_16S	SeqGr81927_1	1	98.25	57	0	1	142	198	1	56	6e-21	99	55
N.meningitidis_16S	SeqGr62908_1	1	95.24	63	2	1	142	204	1	62	6e-21	99	61
N.meningitidis_16S	SeqGr50160_1	1	98.25	57	0	1	149	205	1	56	6e-21	99	55
N.meningitidis_16S	SeqGr41621_1	1	95.16	62	3	0	1	62	40	101	6e-21	99	61
N.meningitidis_16S	SeqGr4016_1	1	100	53	0	0	86	138	41	93	6e-21	99	52
N.meningitidis_16S	SeqGr515084_1	1	95.08	61	3	0	1	61	39	99	2e-20	97.1	60
N.meningitidis_16S	SeqGr514094_1	1	100	52	0	0	55	106	1	52	2e-20	97.1	51
N.meningitidis_16S	SeqGr513585_1	1	100	52	0	0	85	136	1	52	2e-20	97.1	51
N.meningitidis_16S	SeqGr502596_1	1	100	52	0	0	59	110	1	52	2e-20	97.1	51
N.meningitidis_16S	SeqGr487976_1	1	98.21	56	0	1	143	198	1	55	2e-20	97.1	54
N.meningitidis_16S	SeqGr483946_1	1	98.21	56	0	1	150	205	1	55	2e-20	97.1	54
N.meningitidis_16S	SeqGr464933_1	1	98.21	56	0	1	142	197	1	55	2e-20	97.1	54
N.meningitidis_16S	SeqGr447098_1	1	98.21	56	0	1	142	197	1	55	2e-20	97.1	54
N.meningitidis_16S	SeqGr415290_1	1	95.08	61	3	0	1	61	40	100	2e-20	97.1	60
N.meningitidis_16S	SeqGr260473_1	1	95.08	61	3	0	1	61	37	97	2e-20	97.1	60
N.meningitidis_16S	SeqGr195485_1	1	98.21	56	0	1	149	204	1	55	2e-20	97.1	54
N.meningitidis_16S	SeqGr179379_1	1	95.08	61	3	0	1	61	37	97	2e-20	97.1	60
N.meningitidis_16S	SeqGr175401_1	1	100	52	0	0	90	141	1	52	2e-20	97.1	51
N.meningitidis_16S	SeqGr169067_1	1	100	52	0	0	59	110	1	52	2e-20	97.1	51
N.meningitidis_16S	SeqGr150842_1	1	100	52	0	0	85	136	1	52	2e-20	97.1	51
N.meningitidis_16S	SeqGr137872_1	1	100	52	0	0	90	141	1	52	2e-20	97.1	51
N.meningitidis_16S	SeqGr75257_1	1	98.21	56	0	1	150	205	26	80	2e-20	97.1	54
N.meningitidis_16S	SeqGr71161_1	1	95.08	61	3	0	1	61	39	99	2e-20	97.1	60
N.meningitidis_16S	SeqGr44150_2	2	98.21	56	0	1	142	197	1	55	2e-20	97.1	54
N.meningitidis_16S	SeqGr35851_1	1	95.08	61	3	0	1	61	41	101	2e-20	97.1	60
N.meningitidis_16S	SeqGr8983_1	1	98.21	56	0	1	150	205	1	55	2e-20	97.1	54
N.meningitidis_16S	SeqGr532945_1	1	93.75	64	3	1	142	205	1	63	8e-20	95.3	62
N.meningitidis_16S	SeqGr521856_1	1	93.75	64	3	1	142	205	1	63	8e-20	95.3	62
N.meningitidis_16S	SeqGr520656_1	1	95.08	61	2	1	142	202	1	60	8e-20	95.3	59
N.meningitidis_16S	SeqGr503795_1	1	95	60	3	0	1	60	38	97	8e-20	95.3	59
N.meningitidis_16S	SeqGr471956_1	1	93.75	64	3	1	142	205	1	63	8e-20	95.3	62
N.meningitidis_16S	SeqGr464620_1	1	95	60	3	0	1	60	37	96	8e-20	95.3	59
N.meningitidis_16S	SeqGr462792_1	1	95.08	61	2	1	142	202	1	60	8e-20	95.3	59
N.meningitidis_16S	SeqGr460820_1	1	95.08	61	2	1	142	202	1	60	8e-20	95.3	59
N.meningitidis_16S	SeqGr453367_1	1	98.18	55	0	1	151	205	1	54	8e-20	95.3	53
N.meningitidis_16S	SeqGr452649_1	1	95	60	3	0	1	60	23	82	8e-20	95.3	59
N.meningitidis_16S	SeqGr439612_1	1	96.55	58	1	1	142	199	1	57	8e-20	95.3	56
N.meningitidis_16S	SeqGr438527_1	1	98.18	55	0	1	150	204	1	54	8e-20	95.3	53
N.meningitidis_16S	SeqGr427479_1	1	96.55	58	1	1	148	205	1	57	8e-20	95.3	56
N.meningitidis_16S	SeqGr416781_1	1	95	60	3	0	1	60	23	82	8e-20	95.3	59
N.meningitidis_16S	SeqGr415220_1	1	95	60	3	0	3	62	1	60	8e-20	95.3	59
N.meningitidis_16S	SeqGr408092_1	1	93.75	64	3	1	142	205	1	63	8e-20	95.3	62
N.meningitidis_16S	SeqGr364661_1	1	93.75	64	3	1	142	205	1	63	8e-20	95.3	62
N.meningitidis_16S	SeqGr363677_1	1	93.75	64	3	1	142	205	1	63	8e-20	95.3	62
N.meningitidis_16S	SeqGr352053_1	1	93.75	64	3	1	142	205	1	63	8e-20	95.3	62
N.meningitidis_16S	SeqGr346229_1	1	93.75	64	3	1	142	205	1	63	8e-20	95.3	62
N.meningitidis_16S	SeqGr340421_1	1	93.75	64	3	1	142	205	1	63	8e-20	95.3	62
N.meningitidis_16S	SeqGr317293_1	1	93.75	64	3	1	142	205	1	63	8e-20	95.3	62
N.meningitidis_16S	SeqGr311226_1	1	95.08	61	2	1	142	202	1	60	8e-20	95.3	59
N.meningitidis_16S	SeqGr307854_1	1	93.75	64	3	1	142	205	1	63	8e-20	95.3	62
N.meningitidis_16S	SeqGr292568_1	1	95	60	3	0	1	60	39	98	8e-20	95.3	59
N.meningitidis_16S	SeqGr290245_1	1	98.18	55	0	1	142	196	2	55	8e-20	95.3	53
N.meningitidis_16S	SeqGr289288_1	1	95.08	61	2	1	145	205	4	63	8e-20	95.3	59
N.meningitidis_16S	SeqGr254374_1	1	93.75	64	3	1	142	205	1	63	8e-20	95.3	62
N.meningitidis_16S	SeqGr248258_1	1	96.55	58	1	1	145	202	1	57	8e-20	95.3	56
N.meningitidis_16S	SeqGr237221_1	1	95	60	3	0	1	60	40	99	8e-20	95.3	59
N.meningitidis_16S	SeqGr230471_1	1	95	60	3	0	1	60	38	97	8e-20	95.3	59
N.meningitidis_16S	SeqGr213281_1	1	93.75	64	3	1	142	205	1	63	8e-20	95.3	62
N.meningitidis_16S	SeqGr208737_1	1	95	60	3	0	1	60	42	101	8e-20	95.3	59
N.meningitidis_16S	SeqGr205167_1	1	95.08	61	2	1	142	202	1	60	8e-20	95.3	59
N.meningitidis_16S	SeqGr204288_1	1	93.75	64	3	1	142	205	1	63	8e-20	95.3	62
N.meningitidis_16S	SeqGr198597_1	1	93.75	64	3	1	142	205	1	63	8e-20	95.3	62
N.meningitidis_16S	SeqGr189438_1	1	95	60	3	0	1	60	41	100	8e-20	95.3	59
N.meningitidis_16S	SeqGr188615_1	1	93.75	64	3	1	142	205	1	63	8e-20	95.3	62
N.meningitidis_16S	SeqGr184867_1	1	93.75	64	3	1	142	205	1	63	8e-20	95.3	62
N.meningitidis_16S	SeqGr173655_1	1	93.75	64	3	1	142	205	1	63	8e-20	95.3	62
N.meningitidis_16S	SeqGr164593_1	1	93.75	64	3	1	142	205	1	63	8e-20	95.3	62
N.meningitidis_16S	SeqGr156676_1	1	93.75	64	3	1	142	205	1	63	8e-20	95.3	62
N.meningitidis_16S	SeqGr154833_1	1	93.75	64	3	1	142	205	1	63	8e-20	95.3	62
N.meningitidis_16S	SeqGr150472_1	1	93.75	64	2	2	142	205	1	62	8e-20	95.3	61
N.meningitidis_16S	SeqGr139332_1	1	95	60	3	0	1	60	42	101	8e-20	95.3	59
N.meningitidis_16S	SeqGr86038_1	1	95.08	61	2	1	142	202	1	60	8e-20	95.3	59
N.meningitidis_16S	SeqGr74159_1	1	95	60	3	0	1	60	42	101	8e-20	95.3	59
N.meningitidis_16S	SeqGr72628_1	1	93.75	64	3	1	142	205	1	63	8e-20	95.3	62
N.meningitidis_16S	SeqGr68108_1	1	95	60	3	0	1	60	37	96	8e-20	95.3	59
N.meningitidis_16S	SeqGr67200_1	1	95	60	3	0	1	60	37	96	8e-20	95.3	59
N.meningitidis_16S	SeqGr67064_1	1	95	60	3	0	1	60	37	96	8e-20	95.3	59
N.meningitidis_16S	SeqGr65436_1	1	95.08	61	2	1	142	202	1	60	8e-20	95.3	59
N.meningitidis_16S	SeqGr60042_1	1	93.75	64	3	1	142	205	1	63	8e-20	95.3	62
N.meningitidis_16S	SeqGr57311_1	1	98.18	55	0	1	142	196	1	54	8e-20	95.3	53
N.meningitidis_16S	SeqGr53303_1	1	95	60	3	0	1	60	42	101	8e-20	95.3	59
N.meningitidis_16S	SeqGr46941_2	2	98.18	55	0	1	142	196	1	54	8e-20	95.3	53
N.meningitidis_16S	SeqGr39746_1	1	98.18	55	0	1	151	205	1	54	8e-20	95.3	53
N.meningitidis_16S	SeqGr28891_1	1	96.55	58	1	1	142	199	1	57	8e-20	95.3	56
N.meningitidis_16S	SeqGr16102_1	1	96.55	58	1	1	142	199	1	57	8e-20	95.3	56
N.meningitidis_16S	SeqGr10388_114	114	98.18	55	0	1	142	196	1	54	8e-20	95.3	53
N.meningitidis_16S	SeqGr533096_1	1	100	50	0	0	50	99	1	50	3e-19	93.5	49
N.meningitidis_16S	SeqGr509737_1	1	98.15	54	0	1	152	205	1	53	3e-19	93.5	52
N.meningitidis_16S	SeqGr430475_1	1	96.49	57	1	1	142	198	1	56	3e-19	93.5	55
N.meningitidis_16S	SeqGr391517_1	1	93.65	63	3	1	143	205	1	62	3e-19	93.5	61
N.meningitidis_16S	SeqGr342919_1	1	93.65	63	3	1	142	204	1	62	3e-19	93.5	61
N.meningitidis_16S	SeqGr256445_1	1	100	50	0	0	156	205	3	52	3e-19	93.5	49
N.meningitidis_16S	SeqGr235021_1	1	98.15	54	0	1	142	195	1	53	3e-19	93.5	52
N.meningitidis_16S	SeqGr219522_1	1	92.31	65	5	0	1	65	37	101	3e-19	93.5	64
N.meningitidis_16S	SeqGr199820_1	1	100	50	0	0	87	136	1	50	3e-19	93.5	49
N.meningitidis_16S	SeqGr195263_7	7	98.15	54	0	1	142	195	1	53	3e-19	93.5	52
N.meningitidis_16S	SeqGr169501_1	1	92.31	65	5	0	1	65	37	101	3e-19	93.5	64
N.meningitidis_16S	SeqGr150390_1	1	100	50	0	0	156	205	2	51	3e-19	93.5	49
N.meningitidis_16S	SeqGr142087_1	1	100	50	0	0	156	205	1	50	3e-19	93.5	49
N.meningitidis_16S	SeqGr139347_1	1	93.65	63	3	1	142	204	1	62	3e-19	93.5	61
N.meningitidis_16S	SeqGr114648_1	1	93.65	63	3	1	143	205	1	62	3e-19	93.5	61
N.meningitidis_16S	SeqGr103733_1	1	94.92	59	3	0	1	59	43	101	3e-19	93.5	58
N.meningitidis_16S	SeqGr64163_1	1	98.15	54	0	1	152	205	1	53	3e-19	93.5	52
N.meningitidis_16S	SeqGr57265_1	1	94.92	59	3	0	1	59	10	68	3e-19	93.5	58
N.meningitidis_16S	SeqGr44215_1	1	100	50	0	0	156	205	1	50	3e-19	93.5	49
N.meningitidis_16S	SeqGr33427_1	1	100	50	0	0	105	154	1	50	3e-19	93.5	49
N.meningitidis_16S	SeqGr25652_1	1	98.15	54	0	1	152	205	1	53	3e-19	93.5	52
N.meningitidis_16S	SeqGr17564_1	1	93.55	62	4	0	1	62	40	101	3e-19	93.5	61
N.meningitidis_16S	SeqGr15152_6	6	98.15	54	0	1	143	196	1	53	3e-19	93.5	52
N.meningitidis_16S	SeqGr14755_1	1	98.15	54	0	1	67	119	1	54	3e-19	93.5	53
N.meningitidis_16S	SeqGr8222_21	21	98.15	54	0	1	142	195	1	53	3e-19	93.5	52
N.meningitidis_16S	SeqGr7057_27	27	98.15	54	0	1	142	195	1	53	3e-19	93.5	52
N.meningitidis_16S	SeqGr2769_1	1	100	50	0	0	156	205	1	50	3e-19	93.5	49
N.meningitidis_16S	SeqGr522888_1	1	94.83	58	3	0	1	58	44	101	1e-18	91.6	57
N.meningitidis_16S	SeqGr516563_1	1	94.83	58	3	0	1	58	38	95	1e-18	91.6	57
N.meningitidis_16S	SeqGr493445_1	1	98.11	53	0	1	142	194	1	52	1e-18	91.6	51
N.meningitidis_16S	SeqGr492105_1	1	100	49	0	0	66	114	1	49	1e-18	91.6	48
N.meningitidis_16S	SeqGr480395_1	1	98.11	53	0	1	142	194	1	52	1e-18	91.6	51
N.meningitidis_16S	SeqGr475604_1	1	94.83	58	3	0	1	58	38	95	1e-18	91.6	57
N.meningitidis_16S	SeqGr465476_1	1	100	49	0	0	93	141	1	49	1e-18	91.6	48
N.meningitidis_16S	SeqGr334080_1	1	94.83	58	3	0	1	58	37	94	1e-18	91.6	57
N.meningitidis_16S	SeqGr327325_1	1	94.83	58	3	0	1	58	38	95	1e-18	91.6	57
N.meningitidis_16S	SeqGr305711_1	1	96.43	56	1	1	150	205	1	55	1e-18	91.6	54
N.meningitidis_16S	SeqGr270334_2	2	98.11	53	0	1	143	195	1	52	1e-18	91.6	51
N.meningitidis_16S	SeqGr269301_1	1	98.11	53	0	1	142	194	1	52	1e-18	91.6	51
N.meningitidis_16S	SeqGr263003_1	1	94.83	58	3	0	1	58	40	97	1e-18	91.6	57
N.meningitidis_16S	SeqGr248021_1	1	100	49	0	0	105	153	1	49	1e-18	91.6	48
N.meningitidis_16S	SeqGr217654_1	1	94.83	58	3	0	1	58	41	98	1e-18	91.6	57
N.meningitidis_16S	SeqGr128210_1	1	94.83	58	3	0	1	58	40	97	1e-18	91.6	57
N.meningitidis_16S	SeqGr117211_1	1	100	49	0	0	66	114	1	49	1e-18	91.6	48
N.meningitidis_16S	SeqGr109456_1	1	94.83	58	3	0	1	58	37	94	1e-18	91.6	57
N.meningitidis_16S	SeqGr103063_1	1	93.55	62	3	1	142	203	1	61	1e-18	91.6	60
N.meningitidis_16S	SeqGr98857_1	1	98.11	53	0	1	142	194	1	52	1e-18	91.6	51
N.meningitidis_16S	SeqGr87421_2	2	98.11	53	0	1	142	194	1	52	1e-18	91.6	51
N.meningitidis_16S	SeqGr86706_1	1	94.83	58	3	0	1	58	44	101	1e-18	91.6	57
N.meningitidis_16S	SeqGr61609_1	1	93.44	61	4	0	1	61	41	101	1e-18	91.6	60
N.meningitidis_16S	SeqGr61225_3	3	98.11	53	0	1	143	195	1	52	1e-18	91.6	51
N.meningitidis_16S	SeqGr43226_1	1	94.83	58	3	0	1	58	23	80	1e-18	91.6	57
N.meningitidis_16S	SeqGr33605_3	3	98.11	53	0	1	142	194	1	52	1e-18	91.6	51
N.meningitidis_16S	SeqGr28863_1	1	100	49	0	0	157	205	1	49	1e-18	91.6	48
N.meningitidis_16S	SeqGr28329_6	6	98.11	53	0	1	142	194	1	52	1e-18	91.6	51
N.meningitidis_16S	SeqGr18833_1	1	94.83	58	3	0	1	58	37	94	1e-18	91.6	57
N.meningitidis_16S	SeqGr15394_5	5	100	49	0	0	66	114	1	49	1e-18	91.6	48
N.meningitidis_16S	SeqGr10882_39	39	98.11	53	0	1	142	194	1	52	1e-18	91.6	51
N.meningitidis_16S	SeqGr8113_8	8	98.11	53	0	1	142	194	1	52	1e-18	91.6	51
N.meningitidis_16S	SeqGr526133_1	1	94.74	57	3	0	1	57	23	79	4e-18	89.8	56
N.meningitidis_16S	SeqGr508947_1	1	92.19	64	4	1	142	205	1	63	4e-18	89.8	62
N.meningitidis_16S	SeqGr460919_1	1	94.83	58	2	1	142	199	1	57	4e-18	89.8	56
N.meningitidis_16S	SeqGr460111_1	1	94.74	57	3	0	1	57	37	93	4e-18	89.8	56
N.meningitidis_16S	SeqGr457850_1	1	94.74	57	3	0	1	57	38	94	4e-18	89.8	56
N.meningitidis_16S	SeqGr436014_1	1	96.36	55	1	1	151	205	1	54	4e-18	89.8	53
N.meningitidis_16S	SeqGr419217_1	1	98.08	52	0	1	142	193	1	51	4e-18	89.8	50
N.meningitidis_16S	SeqGr414802_1	1	92.19	64	4	1	142	205	1	63	4e-18	89.8	62
N.meningitidis_16S	SeqGr386756_1	1	98.08	52	0	1	142	193	1	51	4e-18	89.8	50
N.meningitidis_16S	SeqGr381132_1	1	94.74	57	3	0	1	57	42	98	4e-18	89.8	56
N.meningitidis_16S	SeqGr374902_1	1	92.19	64	4	1	142	205	1	63	4e-18	89.8	62
N.meningitidis_16S	SeqGr364475_1	1	92.19	64	4	1	142	205	1	63	4e-18	89.8	62
N.meningitidis_16S	SeqGr362151_1	1	93.44	61	3	1	142	202	1	60	4e-18	89.8	59
N.meningitidis_16S	SeqGr360497_1	1	94.74	57	3	0	1	57	42	98	4e-18	89.8	56
N.meningitidis_16S	SeqGr358596_2	2	98.08	52	0	1	142	193	1	51	4e-18	89.8	50
N.meningitidis_16S	SeqGr343109_2	2	100	48	0	0	63	110	1	48	4e-18	89.8	47
N.meningitidis_16S	SeqGr337171_1	1	98.08	52	0	1	142	193	1	51	4e-18	89.8	50
N.meningitidis_16S	SeqGr332365_1	1	98.08	52	0	1	142	193	1	51	4e-18	89.8	50
N.meningitidis_16S	SeqGr315790_1	1	96.36	55	1	1	151	205	1	54	4e-18	89.8	53
N.meningitidis_16S	SeqGr312207_1	1	98.08	52	0	1	142	193	1	51	4e-18	89.8	50
N.meningitidis_16S	SeqGr290002_1	1	92.19	64	4	1	142	205	1	63	4e-18	89.8	62
N.meningitidis_16S	SeqGr276281_1	1	98.08	52	0	1	142	193	1	51	4e-18	89.8	50
N.meningitidis_16S	SeqGr271478_1	1	93.44	61	3	1	1	60	23	83	4e-18	89.8	60
N.meningitidis_16S	SeqGr263284_4	4	98.08	52	0	1	142	193	1	51	4e-18	89.8	50
N.meningitidis_16S	SeqGr254182_1	1	94.74	57	3	0	1	57	42	98	4e-18	89.8	56
N.meningitidis_16S	SeqGr241145_1	1	98.08	52	0	1	142	193	1	51	4e-18	89.8	50
N.meningitidis_16S	SeqGr239813_1	1	96.36	55	1	1	142	196	1	54	4e-18	89.8	53
N.meningitidis_16S	SeqGr237208_1	1	100	48	0	0	66	113	1	48	4e-18	89.8	47
N.meningitidis_16S	SeqGr211515_1	1	94.74	57	3	0	1	57	45	101	4e-18	89.8	56
N.meningitidis_16S	SeqGr205295_1	1	92.19	64	4	1	142	205	1	63	4e-18	89.8	62
N.meningitidis_16S	SeqGr182955_1	1	92.19	64	4	1	142	205	1	63	4e-18	89.8	62
N.meningitidis_16S	SeqGr173751_1	1	91.04	67	4	2	1	66	36	101	4e-18	89.8	65
N.meningitidis_16S	SeqGr169251_1	1	94.74	57	3	0	1	57	37	93	4e-18	89.8	56
N.meningitidis_16S	SeqGr160778_1	1	94.74	57	3	0	1	57	45	101	4e-18	89.8	56
N.meningitidis_16S	SeqGr125378_1	1	98.08	52	0	1	143	194	1	51	4e-18	89.8	50
N.meningitidis_16S	SeqGr125119_1	1	93.33	60	4	0	1	60	42	101	4e-18	89.8	59
N.meningitidis_16S	SeqGr125073_1	1	94.74	57	3	0	1	57	40	96	4e-18	89.8	56
N.meningitidis_16S	SeqGr122272_1	1	98.08	52	0	1	142	193	1	51	4e-18	89.8	50
N.meningitidis_16S	SeqGr112482_7	7	98.08	52	0	1	142	193	1	51	4e-18	89.8	50
N.meningitidis_16S	SeqGr95113_1	1	94.74	57	3	0	1	57	36	92	4e-18	89.8	56
N.meningitidis_16S	SeqGr87075_2	2	96.36	55	1	1	142	196	1	54	4e-18	89.8	53
N.meningitidis_16S	SeqGr84558_1	1	96.36	55	1	1	142	196	1	54	4e-18	89.8	53
N.meningitidis_16S	SeqGr62239_1	1	94.74	57	3	0	1	57	24	80	4e-18	89.8	56
N.meningitidis_16S	SeqGr35363_1	1	96.36	55	1	1	142	196	1	54	4e-18	89.8	53
N.meningitidis_16S	SeqGr30406_1	1	93.33	60	4	0	1	60	42	101	4e-18	89.8	59
N.meningitidis_16S	SeqGr15999_18	18	98.08	52	0	1	142	193	1	51	4e-18	89.8	50
N.meningitidis_16S	SeqGr12748_1	1	100	48	0	0	91	138	1	48	4e-18	89.8	47
N.meningitidis_16S	SeqGr7106_1	1	94.74	57	3	0	1	57	38	94	4e-18	89.8	56
N.meningitidis_16S	SeqGr509754_1	1	100	47	0	0	159	205	1	47	1e-17	87.9	46
N.meningitidis_16S	SeqGr461716_1	1	92.06	63	4	1	143	205	2	63	1e-17	87.9	61
N.meningitidis_16S	SeqGr455313_1	1	94.74	57	2	1	149	205	1	56	1e-17	87.9	55
N.meningitidis_16S	SeqGr452839_1	1	98.04	51	0	1	142	192	1	50	1e-17	87.9	49
N.meningitidis_16S	SeqGr436860_1	1	100	47	0	0	66	112	1	47	1e-17	87.9	46
N.meningitidis_16S	SeqGr433110_1	1	98.04	51	0	1	142	192	1	50	1e-17	87.9	49
N.meningitidis_16S	SeqGr431789_1	1	98.04	51	0	1	142	192	1	50	1e-17	87.9	49
N.meningitidis_16S	SeqGr430628_1	1	98.04	51	0	1	142	192	1	50	1e-17	87.9	49
N.meningitidis_16S	SeqGr409791_1	1	94.64	56	3	0	1	56	40	95	1e-17	87.9	55
N.meningitidis_16S	SeqGr394298_1	1	100	47	0	0	64	110	1	47	1e-17	87.9	46
N.meningitidis_16S	SeqGr383699_4	4	98.04	51	0	1	142	192	1	50	1e-17	87.9	49
N.meningitidis_16S	SeqGr374920_1	1	94.64	56	3	0	1	56	40	95	1e-17	87.9	55
N.meningitidis_16S	SeqGr326845_1	1	98	50	1	0	91	140	1	50	1e-17	87.9	49
N.meningitidis_16S	SeqGr308155_2	2	98.04	51	0	1	142	192	1	50	1e-17	87.9	49
N.meningitidis_16S	SeqGr307775_1	1	94.64	56	3	0	1	56	46	101	1e-17	87.9	55
N.meningitidis_16S	SeqGr301767_1	1	94.64	56	3	0	1	56	37	92	1e-17	87.9	55
N.meningitidis_16S	SeqGr289537_1	1	94.64	56	3	0	1	56	39	94	1e-17	87.9	55
N.meningitidis_16S	SeqGr289460_1	1	94.74	57	2	1	149	205	1	56	1e-17	87.9	55
N.meningitidis_16S	SeqGr270617_1	1	98.04	51	0	1	116	166	1	50	1e-17	87.9	49
N.meningitidis_16S	SeqGr267700_1	1	94.64	56	3	0	1	56	37	92	1e-17	87.9	55
N.meningitidis_16S	SeqGr260777_1	1	94.64	56	3	0	1	56	23	78	1e-17	87.9	55
N.meningitidis_16S	SeqGr209370_2	2	98.04	51	0	1	142	192	1	50	1e-17	87.9	49
N.meningitidis_16S	SeqGr199957_1	1	94.64	56	3	0	1	56	38	93	1e-17	87.9	55
N.meningitidis_16S	SeqGr191700_4	4	98.04	51	0	1	142	192	1	50	1e-17	87.9	49
N.meningitidis_16S	SeqGr190501_1	1	98.04	51	0	1	142	192	1	50	1e-17	87.9	49
N.meningitidis_16S	SeqGr184770_1	1	94.64	56	3	0	1	56	42	97	1e-17	87.9	55
N.meningitidis_16S	SeqGr173452_1	1	94.64	56	3	0	1	56	23	78	1e-17	87.9	55
N.meningitidis_16S	SeqGr166446_1	1	94.64	56	3	0	1	56	25	80	1e-17	87.9	55
N.meningitidis_16S	SeqGr150072_1	1	94.64	56	3	0	1	56	45	100	1e-17	87.9	55
N.meningitidis_16S	SeqGr136628_1	1	98.04	51	0	1	142	192	1	50	1e-17	87.9	49
N.meningitidis_16S	SeqGr133582_4	4	98.04	51	0	1	142	192	1	50	1e-17	87.9	49
N.meningitidis_16S	SeqGr131538_1	1	94.64	56	3	0	1	56	26	81	1e-17	87.9	55
N.meningitidis_16S	SeqGr129930_1	1	94.64	56	3	0	1	56	38	93	1e-17	87.9	55
N.meningitidis_16S	SeqGr127907_1	1	94.74	57	2	1	143	199	1	56	1e-17	87.9	55
N.meningitidis_16S	SeqGr103047_1	1	92.06	63	4	1	142	204	1	62	1e-17	87.9	61
N.meningitidis_16S	SeqGr91792_2	2	94.64	56	3	0	1	56	37	92	1e-17	87.9	55
N.meningitidis_16S	SeqGr89554_2	2	98.04	51	0	1	144	194	1	50	1e-17	87.9	49
N.meningitidis_16S	SeqGr76920_2	2	98.04	51	0	1	142	192	1	50	1e-17	87.9	49
N.meningitidis_16S	SeqGr69599_1	1	94.64	56	3	0	1	56	40	95	1e-17	87.9	55
N.meningitidis_16S	SeqGr54322_2	2	98.04	51	0	1	143	193	1	50	1e-17	87.9	49
N.meningitidis_16S	SeqGr35900_19	19	98.04	51	0	1	142	192	1	50	1e-17	87.9	49
N.meningitidis_16S	SeqGr34573_2	2	100	47	0	0	94	140	1	47	1e-17	87.9	46
N.meningitidis_16S	SeqGr31077_1	1	100	47	0	0	92	138	1	47	1e-17	87.9	46
N.meningitidis_16S	SeqGr24704_10	10	98.04	51	0	1	142	192	1	50	1e-17	87.9	49
N.meningitidis_16S	SeqGr6958_7	7	98.04	51	0	1	142	192	1	50	1e-17	87.9	49
N.meningitidis_16S	SeqGr855_87	87	98.04	51	0	1	142	192	1	50	1e-17	87.9	49
N.meningitidis_16S	SeqGr522535_1	1	98	50	0	1	142	191	1	49	5e-17	86.1	48
N.meningitidis_16S	SeqGr515644_1	1	96.15	52	2	0	90	141	1	52	5e-17	86.1	51
N.meningitidis_16S	SeqGr514535_1	1	96.23	53	1	1	142	194	1	52	5e-17	86.1	51
N.meningitidis_16S	SeqGr506213_1	1	100	46	0	0	89	134	39	84	5e-17	86.1	45
N.meningitidis_16S	SeqGr463864_1	1	96.23	53	1	1	142	194	1	52	5e-17	86.1	51
N.meningitidis_16S	SeqGr446347_1	1	98	50	0	1	142	191	1	49	5e-17	86.1	48
N.meningitidis_16S	SeqGr443475_1	1	100	46	0	0	69	114	1	46	5e-17	86.1	45
N.meningitidis_16S	SeqGr424490_1	1	94.55	55	3	0	1	55	38	92	5e-17	86.1	54
N.meningitidis_16S	SeqGr400990_1	1	98	50	0	1	142	191	1	49	5e-17	86.1	48
N.meningitidis_16S	SeqGr364596_1	1	96.23	53	1	1	142	194	1	52	5e-17	86.1	51
N.meningitidis_16S	SeqGr338483_1	1	98	50	0	1	143	192	1	49	5e-17	86.1	48
N.meningitidis_16S	SeqGr334045_1	1	92.06	63	1	4	142	203	1	60	5e-17	86.1	59
N.meningitidis_16S	SeqGr304568_1	1	98	50	0	1	143	192	1	49	5e-17	86.1	48
N.meningitidis_16S	SeqGr304552_1	1	93.22	59	3	1	142	200	1	58	5e-17	86.1	57
N.meningitidis_16S	SeqGr285233_1	1	94.55	55	3	0	1	55	38	92	5e-17	86.1	54
N.meningitidis_16S	SeqGr253505_1	1	94.55	55	3	0	1	55	39	93	5e-17	86.1	54
N.meningitidis_16S	SeqGr247972_1	1	100	46	0	0	64	109	1	46	5e-17	86.1	45
N.meningitidis_16S	SeqGr237272_1	1	94.55	55	3	0	1	55	47	101	5e-17	86.1	54
N.meningitidis_16S	SeqGr210587_2	2	100	46	0	0	97	142	1	46	5e-17	86.1	45
N.meningitidis_16S	SeqGr164707_1	1	94.55	55	3	0	1	55	37	91	5e-17	86.1	54
N.meningitidis_16S	SeqGr158433_3	3	98	50	0	1	142	191	1	49	5e-17	86.1	48
N.meningitidis_16S	SeqGr127187_1	1	94.64	56	2	1	142	197	1	55	5e-17	86.1	54
N.meningitidis_16S	SeqGr122716_1	1	100	46	0	0	156	201	1	46	5e-17	86.1	45
N.meningitidis_16S	SeqGr115393_1	1	94.55	55	3	0	1	55	36	90	5e-17	86.1	54
N.meningitidis_16S	SeqGr100894_1	1	100	46	0	0	86	131	56	101	5e-17	86.1	45
N.meningitidis_16S	SeqGr81452_4	4	98	50	0	1	143	192	1	49	5e-17	86.1	48
N.meningitidis_16S	SeqGr73916_1	1	96.23	53	1	1	142	194	1	52	5e-17	86.1	51
N.meningitidis_16S	SeqGr72352_1	1	94.55	55	3	0	1	55	46	100	5e-17	86.1	54
N.meningitidis_16S	SeqGr53031_2	2	98	50	0	1	143	192	1	49	5e-17	86.1	48
N.meningitidis_16S	SeqGr45611_1	1	100	46	0	0	95	140	1	46	5e-17	86.1	45
N.meningitidis_16S	SeqGr7198_14	14	98	50	0	1	142	191	1	49	5e-17	86.1	48
N.meningitidis_16S	SeqGr4586_1	1	94.55	55	3	0	1	55	42	96	5e-17	86.1	54
N.meningitidis_16S	SeqGr3437_24	24	98	50	0	1	142	191	1	49	5e-17	86.1	48
N.meningitidis_16S	SeqGr529463_1	1	100	45	0	0	161	205	1	45	2e-16	84.2	44
N.meningitidis_16S	SeqGr527637_1	1	100	45	0	0	97	141	1	45	2e-16	84.2	44
N.meningitidis_16S	SeqGr523649_1	1	100	45	0	0	161	205	1	45	2e-16	84.2	44
N.meningitidis_16S	SeqGr514838_1	1	96.15	52	1	1	142	193	1	51	2e-16	84.2	50
N.meningitidis_16S	SeqGr514495_1	1	100	45	0	0	161	205	1	45	2e-16	84.2	44
[truncated: 1,410 more rows]

## Sheet: Nmeningitidis110
Query	DbSeq	Count	%match	matchLen	NumMismatch	GO	q.start	q.end	dbSeqStart	dbSeqEnd	evalue	bitScore	forward	Site	Count of mapped 3' end
N.meningitidis_16S	SeqGr176605_1	1	100	101	0	0	28	128	1	101	8e-48	187	100	1	0
N.meningitidis_16S	SeqGr157713_1	1	100	101	0	0	26	126	1	101	8e-48	187	100	2	0
N.meningitidis_16S	SeqGr130704_1	1	100	101	0	0	39	139	1	101	8e-48	187	100	3	0
N.meningitidis_16S	SeqGr52474_1	1	100	101	0	0	33	133	1	101	8e-48	187	100	4	0
N.meningitidis_16S	SeqGr18336_1	1	100	101	0	0	30	130	1	101	8e-48	187	100	5	0
N.meningitidis_16S	SeqGr131065_1	1	100	100	0	0	25	124	2	101	3e-47	185	99	6	0
N.meningitidis_16S	SeqGr137986_1	1	100	99	0	0	43	141	1	99	1e-46	183	98	7	0
N.meningitidis_16S	SeqGr251054_1	1	99.01	101	1	0	18	118	1	101	4e-46	182	100	8	0
N.meningitidis_16S	SeqGr77031_1	1	100	98	0	0	56	153	1	98	4e-46	182	97	9	0
N.meningitidis_16S	SeqGr75924_1	1	99.01	101	1	0	30	130	1	101	4e-46	182	100	10	0
N.meningitidis_16S	SeqGr72220_1	1	99.01	101	1	0	39	139	1	101	4e-46	182	100	11	0
N.meningitidis_16S	SeqGr47522_1	1	99.02	102	0	1	66	167	1	101	4e-46	182	100	12	0
N.meningitidis_16S	SeqGr42122_1	1	100	98	0	0	25	122	4	101	4e-46	182	97	13	0
N.meningitidis_16S	SeqGr226456_1	1	99	100	1	0	19	118	2	101	1e-45	180	99	14	0
N.meningitidis_16S	SeqGr92331_1	1	99.01	101	0	1	105	205	1	100	1e-45	180	99	15	0
N.meningitidis_16S	SeqGr188917_1	1	98.99	99	1	0	17	115	3	101	5e-45	178	98	16	0
N.meningitidis_16S	SeqGr127868_1	1	100	96	0	0	45	140	1	96	5e-45	178	95	17	0
N.meningitidis_16S	SeqGr66140_1	1	99	100	0	1	106	205	1	99	5e-45	178	98	18	0
N.meningitidis_16S	SeqGr164241_1	1	98.02	101	2	0	11	111	1	101	2e-44	176	100	19	0
N.meningitidis_16S	SeqGr117319_1	1	98.04	102	1	1	64	165	1	101	2e-44	176	100	20	0
N.meningitidis_16S	SeqGr113764_1	1	98.98	98	1	0	51	148	1	98	2e-44	176	97	21	0
N.meningitidis_16S	SeqGr89685_1	1	98.98	98	1	0	17	114	1	98	2e-44	176	97	22	0
N.meningitidis_16S	SeqGr130250_1	1	100	94	0	0	61	154	1	94	6e-44	174	93	23	0
N.meningitidis_16S	SeqGr241014_1	1	97.03	101	3	0	3	103	1	101	8e-43	171	100	24	0
N.meningitidis_16S	SeqGr166170_1	1	97.03	101	3	0	6	106	1	101	8e-43	171	100	25	0
N.meningitidis_16S	SeqGr123230_1	1	97.96	98	2	0	25	122	4	101	8e-43	171	97	26	0
N.meningitidis_16S	SeqGr55718_1	1	97.03	101	3	0	5	105	1	101	8e-43	171	100	27	0
N.meningitidis_16S	SeqGr137304_1	1	96.94	98	3	0	25	122	4	101	4e-41	165	97	28	0
N.meningitidis_16S	SeqGr279974_1	1	96.91	97	3	0	1	97	5	101	1e-40	163	96	29	0
N.meningitidis_16S	SeqGr126737_1	1	100	88	0	0	66	153	1	88	1e-40	163	87	30	0
N.meningitidis_16S	SeqGr60582_1	1	100	88	0	0	66	153	1	88	1e-40	163	87	31	0
N.meningitidis_16S	SeqGr276032_1	1	98.9	91	0	1	115	205	1	90	5e-40	161	89	32	0
N.meningitidis_16S	SeqGr49193_1	1	100	87	0	0	54	140	1	87	5e-40	161	86	33	0
N.meningitidis_16S	SeqGr249784_1	1	98.88	89	1	0	21	109	1	89	2e-39	159	88	34	0
N.meningitidis_16S	SeqGr224403_1	1	100	86	0	0	56	141	1	86	2e-39	159	85	35	0
N.meningitidis_16S	SeqGr33206_1	1	98.89	90	0	1	116	205	1	89	2e-39	159	88	36	4
N.meningitidis_16S	SeqGr259810_1	1	100	85	0	0	70	154	1	85	6e-39	158	84	37	12
N.meningitidis_16S	SeqGr79285_1	1	100	85	0	0	69	153	1	85	6e-39	158	84	38	19
N.meningitidis_16S	SeqGr259647_1	1	100	84	0	0	65	148	1	84	2e-38	156	83	39	6
N.meningitidis_16S	SeqGr278378_1	1	98.84	86	1	0	56	141	1	86	8e-38	154	85	40	10
N.meningitidis_16S	SeqGr202570_1	1	100	83	0	0	66	148	1	83	8e-38	154	82	41	7
N.meningitidis_16S	SeqGr130596_1	1	100	83	0	0	59	141	1	83	8e-38	154	82	42	8
N.meningitidis_16S	SeqGr127503_1	1	98.85	87	0	1	119	205	1	86	8e-38	154	85	43	15
N.meningitidis_16S	SeqGr108891_1	1	100	83	0	0	59	141	1	83	8e-38	154	82	44	8
N.meningitidis_16S	SeqGr269636_1	1	100	82	0	0	59	140	1	82	3e-37	152	81	45	13
N.meningitidis_16S	SeqGr246589_1	1	97.75	89	1	1	117	205	1	88	3e-37	152	87	46	6
N.meningitidis_16S	SeqGr171240_1	1	96.7	91	3	0	1	91	11	101	3e-37	152	90	47	8
N.meningitidis_16S	SeqGr89757_1	1	100	82	0	0	59	140	1	82	3e-37	152	81	48	2
N.meningitidis_16S	SeqGr18604_1	1	100	82	0	0	72	153	1	82	3e-37	152	81	49	1
N.meningitidis_16S	SeqGr217919_1	1	100	80	0	0	62	141	1	80	4e-36	148	79	50	2
N.meningitidis_16S	SeqGr214996_1	1	96.67	90	2	1	116	205	1	89	4e-36	148	88	51	2
N.meningitidis_16S	SeqGr136014_1	1	100	80	0	0	62	141	1	80	4e-36	148	79	52	2
N.meningitidis_16S	SeqGr131192_1	1	100	80	0	0	61	140	1	80	4e-36	148	79	53	0
N.meningitidis_16S	SeqGr76424_1	1	100	80	0	0	61	140	1	80	4e-36	148	79	54	3
N.meningitidis_16S	SeqGr72532_1	1	100	79	0	0	63	141	1	79	1e-35	147	78	55	4
N.meningitidis_16S	SeqGr70500_1	1	100	79	0	0	59	137	1	79	1e-35	147	78	56	6
N.meningitidis_16S	SeqGr27471_1	1	100	79	0	0	62	140	1	79	1e-35	147	78	57	6
N.meningitidis_16S	SeqGr25736_1	1	100	79	0	0	62	140	1	79	1e-35	147	78	58	6
N.meningitidis_16S	SeqGr211133_1	1	98.77	81	1	0	60	140	1	81	5e-35	145	80	59	6
N.meningitidis_16S	SeqGr86356_1	1	100	78	0	0	64	141	1	78	5e-35	145	77	60	5
N.meningitidis_16S	SeqGr44045_1	1	100	78	0	0	62	139	1	78	5e-35	145	77	61	6
N.meningitidis_16S	SeqGr28609_1	1	100	78	0	0	63	140	1	78	5e-35	145	77	62	3
N.meningitidis_16S	SeqGr278230_1	1	100	77	0	0	63	139	1	77	2e-34	143	76	63	4
N.meningitidis_16S	SeqGr231633_1	1	100	77	0	0	64	140	1	77	2e-34	143	76	64	1
N.meningitidis_16S	SeqGr231392_2	2	100	77	0	0	62	138	1	77	2e-34	143	76	65	1
N.meningitidis_16S	SeqGr226348_1	1	100	77	0	0	65	141	1	77	2e-34	143	76	66	1
N.meningitidis_16S	SeqGr103227_1	1	100	77	0	0	64	140	1	77	2e-34	143	76	67	1
N.meningitidis_16S	SeqGr96388_2	2	100	77	0	0	65	141	1	77	2e-34	143	76	68	1
N.meningitidis_16S	SeqGr57580_1	1	100	77	0	0	66	142	1	77	2e-34	143	76	69	1
N.meningitidis_16S	SeqGr262997_1	1	100	76	0	0	66	141	1	76	6e-34	141	75	70	1
N.meningitidis_16S	SeqGr42495_3	3	100	76	0	0	66	141	1	76	6e-34	141	75	71	0
N.meningitidis_16S	SeqGr34390_2	2	100	76	0	0	65	140	1	76	6e-34	141	75	72	2
N.meningitidis_16S	SeqGr20315_10	10	100	76	0	0	66	141	1	76	6e-34	141	75	73	0
N.meningitidis_16S	SeqGr267416_1	1	100	75	0	0	62	136	1	75	2e-33	139	74	74	0
N.meningitidis_16S	SeqGr259342_1	1	98.73	79	0	1	116	194	1	78	2e-33	139	77	75	1
N.meningitidis_16S	SeqGr241402_1	1	100	75	0	0	64	138	1	75	2e-33	139	74	76	0
N.meningitidis_16S	SeqGr144301_1	1	98.72	78	1	0	63	140	1	78	2e-33	139	77	77	1
N.meningitidis_16S	SeqGr134089_1	1	100	75	0	0	66	140	1	75	2e-33	139	74	78	0
N.meningitidis_16S	SeqGr61654_2	2	100	75	0	0	66	140	1	75	2e-33	139	74	79	4
N.meningitidis_16S	SeqGr61294_1	1	100	75	0	0	66	140	1	75	2e-33	139	74	80	0
N.meningitidis_16S	SeqGr50660_1	1	100	75	0	0	62	136	1	75	2e-33	139	74	81	0
N.meningitidis_16S	SeqGr43891_4	4	100	75	0	0	66	140	1	75	2e-33	139	74	82	0
N.meningitidis_16S	SeqGr26446_6	6	100	75	0	0	66	140	1	75	2e-33	139	74	83	1
N.meningitidis_16S	SeqGr20056_1	1	100	75	0	0	64	138	1	75	2e-33	139	74	84	0
N.meningitidis_16S	SeqGr14244_1	1	100	75	0	0	66	140	1	75	2e-33	139	74	85	0
N.meningitidis_16S	SeqGr266226_1	1	100	74	0	0	67	140	1	74	8e-33	137	73	86	0
N.meningitidis_16S	SeqGr249670_1	1	100	74	0	0	68	141	1	74	8e-33	137	73	87	0
N.meningitidis_16S	SeqGr210955_2	2	100	74	0	0	66	139	1	74	8e-33	137	73	88	0
N.meningitidis_16S	SeqGr192848_1	1	96.39	83	3	0	1	83	19	101	8e-33	137	82	89	0
N.meningitidis_16S	SeqGr144960_3	3	100	74	0	0	69	142	1	74	8e-33	137	73	90	0
N.meningitidis_16S	SeqGr246371_1	1	100	73	0	0	66	138	1	73	3e-32	135	72	91	1
N.meningitidis_16S	SeqGr233493_1	1	98.68	76	1	0	63	138	1	76	3e-32	135	75	92	0
N.meningitidis_16S	SeqGr224816_1	1	100	73	0	0	66	138	1	73	3e-32	135	72	93	0
N.meningitidis_16S	SeqGr216637_1	1	98.68	76	1	0	66	141	1	76	3e-32	135	75	94	0
N.meningitidis_16S	SeqGr149866_3	3	100	73	0	0	66	138	1	73	3e-32	135	72	95	0
N.meningitidis_16S	SeqGr118863_1	1	98.68	76	1	0	66	141	1	76	3e-32	135	75	96	1
N.meningitidis_16S	SeqGr64619_11	11	100	73	0	0	69	141	1	73	3e-32	135	72	97	3
N.meningitidis_16S	SeqGr16476_1	1	98.68	76	1	0	66	141	1	76	3e-32	135	75	98	2
N.meningitidis_16S	SeqGr13228_5	5	100	73	0	0	66	138	1	73	3e-32	135	72	99	2
N.meningitidis_16S	SeqGr10854_1	1	100	73	0	0	68	140	1	73	3e-32	135	72	100	0
N.meningitidis_16S	SeqGr272876_1	1	100	72	0	0	69	140	1	72	1e-31	134	71	101	0
N.meningitidis_16S	SeqGr257302_1	1	98.67	75	1	0	66	140	1	75	1e-31	134	74	102	0
N.meningitidis_16S	SeqGr195796_1	1	100	72	0	0	67	138	1	72	1e-31	134	71	103	1
N.meningitidis_16S	SeqGr171154_1	1	100	72	0	0	70	141	1	72	1e-31	134	71	104	0
N.meningitidis_16S	SeqGr149851_1	1	100	72	0	0	69	140	1	72	1e-31	134	71	105	2
N.meningitidis_16S	SeqGr146609_1	1	100	72	0	0	39	110	1	72	1e-31	134	71	106	2
N.meningitidis_16S	SeqGr133587_1	1	100	72	0	0	63	134	1	72	1e-31	134	71	107	0
N.meningitidis_16S	SeqGr83223_5	5	100	72	0	0	70	141	1	72	1e-31	134	71	108	1
N.meningitidis_16S	SeqGr59064_9	9	100	72	0	0	69	140	1	72	1e-31	134	71	109	12
N.meningitidis_16S	SeqGr14297_1	1	98.67	75	1	0	66	140	1	75	1e-31	134	74	110	24
N.meningitidis_16S	SeqGr5829_4	4	100	72	0	0	69	140	1	72	1e-31	134	71	111	53
N.meningitidis_16S	SeqGr3406_1	1	98.67	75	1	0	67	141	1	75	1e-31	134	74	112	4
N.meningitidis_16S	SeqGr43_1	1	100	72	0	0	66	137	1	72	1e-31	134	71	113	0
N.meningitidis_16S	SeqGr271801_1	1	100	71	0	0	69	139	1	71	4e-31	132	70	114	1
N.meningitidis_16S	SeqGr248644_1	1	100	71	0	0	68	138	1	71	4e-31	132	70	115	1
N.meningitidis_16S	SeqGr163395_1	1	100	71	0	0	66	136	1	71	4e-31	132	70	116	0
N.meningitidis_16S	SeqGr143204_1	1	100	71	0	0	71	141	1	71	4e-31	132	70	117	0
N.meningitidis_16S	SeqGr115161_7	7	100	71	0	0	66	136	1	71	4e-31	132	70	118	2
N.meningitidis_16S	SeqGr91908_1	1	100	71	0	0	69	139	1	71	4e-31	132	70	119	0
N.meningitidis_16S	SeqGr76168_2	2	100	71	0	0	66	136	1	71	4e-31	132	70	120	0
N.meningitidis_16S	SeqGr53503_1	1	100	71	0	0	69	139	1	71	4e-31	132	70	121	0
N.meningitidis_16S	SeqGr21154_1	1	98.65	74	1	0	66	139	1	74	4e-31	132	73	122	3
N.meningitidis_16S	SeqGr239215_1	1	100	70	0	0	67	136	1	70	1e-30	130	69	123	3
N.meningitidis_16S	SeqGr238930_1	1	100	70	0	0	69	138	1	70	1e-30	130	69	124	1
N.meningitidis_16S	SeqGr181990_1	1	98.63	73	1	0	66	138	1	73	1e-30	130	72	125	2
N.meningitidis_16S	SeqGr169028_1	1	97.37	76	2	0	66	141	1	76	1e-30	130	75	126	3
N.meningitidis_16S	SeqGr160959_1	1	100	70	0	0	71	140	1	70	1e-30	130	69	127	0
N.meningitidis_16S	SeqGr160653_1	1	100	70	0	0	66	135	1	70	1e-30	130	69	128	1
N.meningitidis_16S	SeqGr145883_1	1	98.63	73	1	0	69	141	1	73	1e-30	130	72	129	1
N.meningitidis_16S	SeqGr137026_2	2	100	70	0	0	69	138	1	70	1e-30	130	69	130	3
N.meningitidis_16S	SeqGr103882_1	1	96.2	79	3	0	1	79	23	101	1e-30	130	78	131	1
N.meningitidis_16S	SeqGr55898_1	1	96.2	79	3	0	1	79	23	101	1e-30	130	78	132	3
N.meningitidis_16S	SeqGr48111_1	1	98.63	73	1	0	66	138	1	73	1e-30	130	72	133	1
N.meningitidis_16S	SeqGr41288_2	2	100	70	0	0	69	138	1	70	1e-30	130	69	134	5
N.meningitidis_16S	SeqGr16629_1	1	98.63	73	1	0	66	138	1	73	1e-30	130	72	135	1
N.meningitidis_16S	SeqGr6831_1	1	96.2	79	3	0	1	79	23	101	1e-30	130	78	136	26
N.meningitidis_16S	SeqGr265432_1	1	100	69	0	0	68	136	1	69	5e-30	128	68	137	12
N.meningitidis_16S	SeqGr265372_1	1	100	69	0	0	66	134	1	69	5e-30	128	68	138	96
N.meningitidis_16S	SeqGr137911_1	1	98.63	73	0	1	133	205	1	72	5e-30	128	71	139	60
N.meningitidis_16S	SeqGr86253_1	1	100	69	0	0	64	132	1	69	5e-30	128	68	140	324
N.meningitidis_16S	SeqGr173481_1	1	96.1	77	3	0	1	77	25	101	2e-29	126	76	141	484
N.meningitidis_16S	SeqGr146222_1	1	100	68	0	0	71	138	1	68	2e-29	126	67	142	45
N.meningitidis_16S	SeqGr91703_4	4	100	68	0	0	69	136	1	68	2e-29	126	67	143	1
N.meningitidis_16S	SeqGr37401_1	1	100	68	0	0	75	142	1	68	2e-29	126	67	144	0
N.meningitidis_16S	SeqGr32929_1	1	100	68	0	0	69	136	1	68	2e-29	126	67	145	0
N.meningitidis_16S	SeqGr20659_1	1	98.59	71	1	0	66	136	1	71	2e-29	126	70	146	0
N.meningitidis_16S	SeqGr47635_1	1	94.94	79	4	0	1	79	23	101	6e-29	124	78	147	1
N.meningitidis_16S	SeqGr25271_1	1	100	67	0	0	42	108	1	67	6e-29	124	66	148	7
N.meningitidis_16S	SeqGr269177_1	1	100	66	0	0	71	136	1	66	2e-28	122	65	149	0
N.meningitidis_16S	SeqGr202396_1	1	97.22	72	2	0	66	137	1	72	2e-28	122	71	150	0
N.meningitidis_16S	SeqGr201109_1	1	100	66	0	0	66	131	1	66	2e-28	122	65	151	0
N.meningitidis_16S	SeqGr174790_1	1	96	75	3	0	66	140	1	75	2e-28	122	74	152	12
N.meningitidis_16S	SeqGr31007_1	1	96	75	3	0	1	75	27	101	2e-28	122	74	153	25
N.meningitidis_16S	SeqGr14406_1	1	97.26	73	1	1	133	205	1	72	2e-28	122	71	154	25
N.meningitidis_16S	SeqGr244235_1	1	100	65	0	0	72	136	1	65	8e-28	121	64	155	0
N.meningitidis_16S	SeqGr158481_1	1	94.87	78	3	1	115	192	1	77	8e-28	121	76	156	0
N.meningitidis_16S	SeqGr135377_1	1	100	65	0	0	66	130	1	65	8e-28	121	64	157	2
N.meningitidis_16S	SeqGr70304_1	1	98.55	69	0	1	137	205	1	68	8e-28	121	67	158	1
N.meningitidis_16S	SeqGr178895_1	1	98.51	67	1	0	66	132	1	67	3e-27	119	66	159	0
N.meningitidis_16S	SeqGr160688_1	1	100	64	0	0	69	132	1	64	3e-27	119	63	160	0
N.meningitidis_16S	SeqGr96750_1	1	98.51	67	1	0	72	138	1	67	3e-27	119	66	161	0
N.meningitidis_16S	SeqGr47165_1	1	100	64	0	0	66	129	1	64	3e-27	119	63	162	0
N.meningitidis_16S	SeqGr179448_1	1	100	63	0	0	78	140	1	63	1e-26	117	62	163	0
N.meningitidis_16S	SeqGr163391_1	1	95.83	72	3	0	1	72	30	101	1e-26	117	71	164	1
N.meningitidis_16S	SeqGr225890_1	1	98.48	66	0	1	140	205	21	85	4e-26	115	64	165	1
N.meningitidis_16S	SeqGr135517_1	1	100	62	0	0	64	125	1	62	4e-26	115	61	166	0
N.meningitidis_16S	SeqGr253182_1	1	98.46	65	0	1	141	205	1	64	1e-25	113	63	167	1
N.meningitidis_16S	SeqGr86362_1	1	100	61	0	0	66	126	1	61	1e-25	113	60	168	0
N.meningitidis_16S	SeqGr64982_1	1	100	61	0	0	50	110	1	61	1e-25	113	60	169	0
N.meningitidis_16S	SeqGr3825_1	1	95.71	70	3	0	1	70	32	101	1e-25	113	69	170	0
N.meningitidis_16S	SeqGr276489_1	1	98.44	64	0	1	142	205	1	63	5e-25	111	62	171	0
N.meningitidis_16S	SeqGr274290_1	1	98.44	64	0	1	142	205	1	63	5e-25	111	62	172	4
N.meningitidis_16S	SeqGr272963_1	1	98.44	64	0	1	142	205	1	63	5e-25	111	62	173	1
N.meningitidis_16S	SeqGr272152_1	1	98.44	64	0	1	142	205	1	63	5e-25	111	62	174	4
N.meningitidis_16S	SeqGr271662_1	1	98.44	64	0	1	142	205	1	63	5e-25	111	62	175	3
N.meningitidis_16S	SeqGr269487_1	1	98.44	64	0	1	142	205	1	63	5e-25	111	62	176	1
N.meningitidis_16S	SeqGr267947_1	1	98.44	64	0	1	142	205	1	63	5e-25	111	62	177	0
N.meningitidis_16S	SeqGr266452_1	1	100	60	0	0	66	125	1	60	5e-25	111	59	178	4
N.meningitidis_16S	SeqGr265426_1	1	98.44	64	0	1	142	205	1	63	5e-25	111	62	179	0
N.meningitidis_16S	SeqGr263135_1	1	98.44	64	0	1	142	205	1	63	5e-25	111	62	180	6
N.meningitidis_16S	SeqGr256079_1	1	98.44	64	0	1	142	205	1	63	5e-25	111	62	181	1
N.meningitidis_16S	SeqGr255774_1	1	98.44	64	0	1	142	205	1	63	5e-25	111	62	182	1
N.meningitidis_16S	SeqGr252587_1	1	98.44	64	0	1	142	205	1	63	5e-25	111	62	183	2
N.meningitidis_16S	SeqGr251638_1	1	98.44	64	0	1	142	205	1	63	5e-25	111	62	184	4
N.meningitidis_16S	SeqGr251253_1	1	98.44	64	0	1	142	205	1	63	5e-25	111	62	185	21
N.meningitidis_16S	SeqGr245614_1	1	98.44	64	0	1	142	205	1	63	5e-25	111	62	186	4
N.meningitidis_16S	SeqGr242193_1	1	98.44	64	0	1	142	205	1	63	5e-25	111	62	187	3
N.meningitidis_16S	SeqGr241184_1	1	98.44	64	0	1	142	205	1	63	5e-25	111	62	188	18
N.meningitidis_16S	SeqGr234509_1	1	98.44	64	0	1	142	205	1	63	5e-25	111	62	189	2
N.meningitidis_16S	SeqGr233703_1	1	98.44	64	0	1	142	205	1	63	5e-25	111	62	190	15
N.meningitidis_16S	SeqGr233496_1	1	98.44	64	0	1	142	205	1	63	5e-25	111	62	191	13
N.meningitidis_16S	SeqGr230393_1	1	98.44	64	0	1	142	205	1	63	5e-25	111	62	192	37
N.meningitidis_16S	SeqGr225717_1	1	98.44	64	0	1	142	205	1	63	5e-25	111	62	193	15
N.meningitidis_16S	SeqGr223338_1	1	98.44	64	0	1	142	205	1	63	5e-25	111	62	194	14
N.meningitidis_16S	SeqGr221522_1	1	95.65	69	3	0	1	69	33	101	5e-25	111	68	195	16
N.meningitidis_16S	SeqGr219681_1	1	98.44	64	0	1	142	205	1	63	5e-25	111	62	196	36
N.meningitidis_16S	SeqGr219449_1	1	98.44	64	0	1	142	205	1	63	5e-25	111	62	197	0
N.meningitidis_16S	SeqGr218970_1	1	98.44	64	0	1	142	205	1	63	5e-25	111	62	198	6
N.meningitidis_16S	SeqGr217824_1	1	98.44	64	0	1	142	205	1	63	5e-25	111	62	199	13
N.meningitidis_16S	SeqGr216979_1	1	98.44	64	0	1	142	205	1	63	5e-25	111	62	200	4
N.meningitidis_16S	SeqGr211220_1	1	98.44	64	0	1	142	205	1	63	5e-25	111	62	201	4
N.meningitidis_16S	SeqGr210353_1	1	98.44	64	0	1	142	205	1	63	5e-25	111	62	202	37
N.meningitidis_16S	SeqGr207940_1	1	98.44	64	0	1	142	205	1	63	5e-25	111	62	203	26
N.meningitidis_16S	SeqGr207195_1	1	98.44	64	0	1	142	205	1	63	5e-25	111	62	204	92
N.meningitidis_16S	SeqGr202991_1	1	98.44	64	0	1	142	205	1	63	5e-25	111	62	205	582
N.meningitidis_16S	SeqGr202288_1	1	98.44	64	0	1	142	205	1	63	5e-25	111	62
N.meningitidis_16S	SeqGr201247_1	1	98.44	64	0	1	142	205	1	63	5e-25	111	62
N.meningitidis_16S	SeqGr200150_1	1	98.44	64	0	1	142	205	1	63	5e-25	111	62
N.meningitidis_16S	SeqGr197751_1	1	98.44	64	0	1	142	205	1	63	5e-25	111	62
N.meningitidis_16S	SeqGr195066_1	1	98.44	64	0	1	142	205	1	63	5e-25	111	62
N.meningitidis_16S	SeqGr192930_1	1	98.44	64	0	1	142	205	1	63	5e-25	111	62
N.meningitidis_16S	SeqGr191041_3	3	98.44	64	0	1	142	205	1	63	5e-25	111	62
N.meningitidis_16S	SeqGr189061_1	1	98.44	64	0	1	142	205	1	63	5e-25	111	62
N.meningitidis_16S	SeqGr186412_1	1	98.44	64	0	1	142	205	1	63	5e-25	111	62
N.meningitidis_16S	SeqGr185306_3	3	98.44	64	0	1	142	205	1	63	5e-25	111	62
N.meningitidis_16S	SeqGr182391_1	1	98.44	64	0	1	142	205	2	64	5e-25	111	62
N.meningitidis_16S	SeqGr182160_1	1	98.44	64	0	1	142	205	1	63	5e-25	111	62
N.meningitidis_16S	SeqGr178357_1	1	98.44	64	0	1	142	205	1	63	5e-25	111	62
N.meningitidis_16S	SeqGr177534_1	1	98.44	64	0	1	142	205	1	63	5e-25	111	62
N.meningitidis_16S	SeqGr176773_1	1	98.44	64	0	1	142	205	1	63	5e-25	111	62
N.meningitidis_16S	SeqGr172651_1	1	98.44	64	0	1	142	205	1	63	5e-25	111	62
N.meningitidis_16S	SeqGr171453_1	1	98.44	64	0	1	142	205	1	63	5e-25	111	62
N.meningitidis_16S	SeqGr171222_1	1	98.44	64	0	1	142	205	1	63	5e-25	111	62
N.meningitidis_16S	SeqGr171165_1	1	98.44	64	0	1	142	205	1	63	5e-25	111	62
N.meningitidis_16S	SeqGr169749_1	1	98.44	64	0	1	142	205	1	63	5e-25	111	62
N.meningitidis_16S	SeqGr169171_1	1	98.44	64	0	1	142	205	1	63	5e-25	111	62
N.meningitidis_16S	SeqGr164459_1	1	98.44	64	0	1	142	205	1	63	5e-25	111	62
N.meningitidis_16S	SeqGr163475_1	1	98.44	64	0	1	142	205	1	63	5e-25	111	62
N.meningitidis_16S	SeqGr162714_1	1	98.44	64	0	1	142	205	1	63	5e-25	111	62
N.meningitidis_16S	SeqGr162349_1	1	98.44	64	0	1	142	205	1	63	5e-25	111	62
N.meningitidis_16S	SeqGr161390_1	1	98.44	64	0	1	142	205	1	63	5e-25	111	62
N.meningitidis_16S	SeqGr160818_1	1	98.44	64	0	1	142	205	1	63	5e-25	111	62
N.meningitidis_16S	SeqGr160124_1	1	98.44	64	0	1	142	205	1	63	5e-25	111	62
N.meningitidis_16S	SeqGr159647_1	1	98.44	64	0	1	142	205	1	63	5e-25	111	62
N.meningitidis_16S	SeqGr153289_1	1	98.44	64	0	1	142	205	1	63	5e-25	111	62
N.meningitidis_16S	SeqGr152474_1	1	98.44	64	0	1	142	205	1	63	5e-25	111	62
N.meningitidis_16S	SeqGr151835_1	1	98.44	64	0	1	142	205	1	63	5e-25	111	62
N.meningitidis_16S	SeqGr147193_1	1	98.44	64	0	1	142	205	1	63	5e-25	111	62
N.meningitidis_16S	SeqGr145367_2	2	98.44	64	0	1	142	205	1	63	5e-25	111	62
N.meningitidis_16S	SeqGr142406_2	2	98.44	64	0	1	142	205	1	63	5e-25	111	62
N.meningitidis_16S	SeqGr141335_1	1	98.44	64	0	1	142	205	1	63	5e-25	111	62
N.meningitidis_16S	SeqGr141067_1	1	98.44	64	0	1	142	205	1	63	5e-25	111	62
N.meningitidis_16S	SeqGr139660_1	1	98.44	64	0	1	142	205	1	63	5e-25	111	62
N.meningitidis_16S	SeqGr136896_1	1	98.44	64	0	1	142	205	1	63	5e-25	111	62
N.meningitidis_16S	SeqGr131481_2	2	98.44	64	0	1	142	205	1	63	5e-25	111	62
N.meningitidis_16S	SeqGr128389_1	1	98.44	64	0	1	142	205	1	63	5e-25	111	62
N.meningitidis_16S	SeqGr128089_1	1	98.44	64	0	1	142	205	1	63	5e-25	111	62
N.meningitidis_16S	SeqGr124825_1	1	98.44	64	0	1	142	205	1	63	5e-25	111	62
N.meningitidis_16S	SeqGr124310_2	2	98.44	64	0	1	142	205	1	63	5e-25	111	62
N.meningitidis_16S	SeqGr118801_1	1	98.44	64	0	1	142	205	1	63	5e-25	111	62
N.meningitidis_16S	SeqGr116206_1	1	98.44	64	0	1	142	205	1	63	5e-25	111	62
N.meningitidis_16S	SeqGr112201_1	1	98.44	64	0	1	142	205	1	63	5e-25	111	62
N.meningitidis_16S	SeqGr112026_1	1	98.44	64	0	1	142	205	1	63	5e-25	111	62
N.meningitidis_16S	SeqGr110472_1	1	98.44	64	0	1	142	205	1	63	5e-25	111	62
N.meningitidis_16S	SeqGr109662_1	1	98.44	64	0	1	142	205	1	63	5e-25	111	62
N.meningitidis_16S	SeqGr109063_1	1	98.44	64	0	1	142	205	1	63	5e-25	111	62
N.meningitidis_16S	SeqGr108753_1	1	98.44	64	0	1	142	205	1	63	5e-25	111	62
N.meningitidis_16S	SeqGr107074_2	2	98.44	64	0	1	142	205	1	63	5e-25	111	62
N.meningitidis_16S	SeqGr104251_1	1	98.44	64	0	1	142	205	1	63	5e-25	111	62
N.meningitidis_16S	SeqGr104197_1	1	98.44	64	0	1	142	205	1	63	5e-25	111	62
N.meningitidis_16S	SeqGr103725_1	1	98.44	64	0	1	142	205	1	63	5e-25	111	62
N.meningitidis_16S	SeqGr101007_1	1	98.44	64	0	1	142	205	1	63	5e-25	111	62
N.meningitidis_16S	SeqGr98537_1	1	98.44	64	0	1	142	205	2	64	5e-25	111	62
N.meningitidis_16S	SeqGr98407_1	1	98.44	64	0	1	142	205	1	63	5e-25	111	62
N.meningitidis_16S	SeqGr97730_1	1	98.44	64	0	1	142	205	1	63	5e-25	111	62
N.meningitidis_16S	SeqGr95943_1	1	98.44	64	0	1	142	205	1	63	5e-25	111	62
N.meningitidis_16S	SeqGr95303_1	1	98.44	64	0	1	142	205	1	63	5e-25	111	62
N.meningitidis_16S	SeqGr89343_1	1	98.44	64	0	1	142	205	1	63	5e-25	111	62
N.meningitidis_16S	SeqGr89185_1	1	98.44	64	0	1	142	205	1	63	5e-25	111	62
N.meningitidis_16S	SeqGr86731_1	1	98.44	64	0	1	142	205	1	63	5e-25	111	62
N.meningitidis_16S	SeqGr85274_1	1	98.44	64	0	1	142	205	1	63	5e-25	111	62
N.meningitidis_16S	SeqGr85145_1	1	92.31	78	6	0	63	140	1	78	5e-25	111	77
N.meningitidis_16S	SeqGr84519_1	1	98.44	64	0	1	142	205	1	63	5e-25	111	62
N.meningitidis_16S	SeqGr82708_1	1	98.44	64	0	1	142	205	1	63	5e-25	111	62
N.meningitidis_16S	SeqGr82521_1	1	98.44	64	0	1	142	205	1	63	5e-25	111	62
N.meningitidis_16S	SeqGr80045_1	1	98.44	64	0	1	142	205	1	63	5e-25	111	62
N.meningitidis_16S	SeqGr79911_10	10	98.44	64	0	1	142	205	1	63	5e-25	111	62
N.meningitidis_16S	SeqGr77534_2	2	98.44	64	0	1	142	205	1	63	5e-25	111	62
N.meningitidis_16S	SeqGr76202_1	1	98.44	64	0	1	142	205	1	63	5e-25	111	62
N.meningitidis_16S	SeqGr75761_9	9	98.44	64	0	1	142	205	1	63	5e-25	111	62
N.meningitidis_16S	SeqGr75046_1	1	98.44	64	0	1	142	205	1	63	5e-25	111	62
N.meningitidis_16S	SeqGr69829_1	1	98.44	64	0	1	142	205	3	65	5e-25	111	62
N.meningitidis_16S	SeqGr69530_1	1	98.44	64	0	1	142	205	1	63	5e-25	111	62
N.meningitidis_16S	SeqGr69495_3	3	98.44	64	0	1	142	205	1	63	5e-25	111	62
N.meningitidis_16S	SeqGr68591_1	1	98.44	64	0	1	142	205	1	63	5e-25	111	62
N.meningitidis_16S	SeqGr68068_2	2	98.44	64	0	1	142	205	1	63	5e-25	111	62
N.meningitidis_16S	SeqGr67863_1	1	98.44	64	0	1	142	205	1	63	5e-25	111	62
N.meningitidis_16S	SeqGr67347_1	1	98.44	64	0	1	142	205	1	63	5e-25	111	62
N.meningitidis_16S	SeqGr66658_1	1	98.44	64	0	1	142	205	1	63	5e-25	111	62
N.meningitidis_16S	SeqGr66486_1	1	98.44	64	0	1	142	205	1	63	5e-25	111	62
N.meningitidis_16S	SeqGr66451_1	1	98.44	64	0	1	142	205	1	63	5e-25	111	62
N.meningitidis_16S	SeqGr65934_1	1	98.44	64	0	1	142	205	1	63	5e-25	111	62
N.meningitidis_16S	SeqGr65009_1	1	98.44	64	0	1	142	205	1	63	5e-25	111	62
N.meningitidis_16S	SeqGr62838_4	4	98.44	64	0	1	142	205	1	63	5e-25	111	62
N.meningitidis_16S	SeqGr62735_1	1	98.44	64	0	1	142	205	1	63	5e-25	111	62
N.meningitidis_16S	SeqGr62249_17	17	98.44	64	0	1	142	205	1	63	5e-25	111	62
N.meningitidis_16S	SeqGr61954_1	1	98.44	64	0	1	142	205	1	63	5e-25	111	62
N.meningitidis_16S	SeqGr61369_1	1	98.44	64	0	1	142	205	1	63	5e-25	111	62
N.meningitidis_16S	SeqGr61239_1	1	98.44	64	0	1	142	205	1	63	5e-25	111	62
N.meningitidis_16S	SeqGr61083_1	1	98.44	64	0	1	142	205	1	63	5e-25	111	62
N.meningitidis_16S	SeqGr59452_1	1	98.44	64	0	1	142	205	30	92	5e-25	111	62
N.meningitidis_16S	SeqGr58298_1	1	98.44	64	0	1	142	205	1	63	5e-25	111	62
N.meningitidis_16S	SeqGr56502_3	3	98.44	64	0	1	142	205	1	63	5e-25	111	62
N.meningitidis_16S	SeqGr55662_1	1	98.44	64	0	1	142	205	1	63	5e-25	111	62
N.meningitidis_16S	SeqGr54226_1	1	98.44	64	0	1	142	205	1	63	5e-25	111	62
N.meningitidis_16S	SeqGr53367_2	2	98.44	64	0	1	142	205	1	63	5e-25	111	62
N.meningitidis_16S	SeqGr53191_3	3	98.44	64	0	1	142	205	1	63	5e-25	111	62
N.meningitidis_16S	SeqGr52936_5	5	98.44	64	0	1	142	205	1	63	5e-25	111	62
N.meningitidis_16S	SeqGr52517_6	6	98.44	64	0	1	142	205	1	63	5e-25	111	62
N.meningitidis_16S	SeqGr51069_1	1	94.44	72	4	0	1	72	23	94	5e-25	111	71
N.meningitidis_16S	SeqGr45869_1	1	98.44	64	0	1	142	205	1	63	5e-25	111	62
N.meningitidis_16S	SeqGr45737_1	1	98.44	64	0	1	142	205	1	63	5e-25	111	62
N.meningitidis_16S	SeqGr43954_8	8	98.44	64	0	1	142	205	1	63	5e-25	111	62
N.meningitidis_16S	SeqGr43629_1	1	98.44	64	0	1	142	205	1	63	5e-25	111	62
N.meningitidis_16S	SeqGr42988_1	1	98.44	64	0	1	142	205	1	63	5e-25	111	62
N.meningitidis_16S	SeqGr40950_9	9	98.44	64	0	1	142	205	1	63	5e-25	111	62
N.meningitidis_16S	SeqGr39075_1	1	98.44	64	0	1	142	205	1	63	5e-25	111	62
N.meningitidis_16S	SeqGr38637_1	1	98.44	64	0	1	142	205	1	63	5e-25	111	62
N.meningitidis_16S	SeqGr38335_1	1	98.44	64	0	1	142	205	1	63	5e-25	111	62
N.meningitidis_16S	SeqGr38215_1	1	98.44	64	0	1	142	205	1	63	5e-25	111	62
N.meningitidis_16S	SeqGr37721_1	1	98.44	64	0	1	142	205	1	63	5e-25	111	62
N.meningitidis_16S	SeqGr36095_1	1	98.44	64	0	1	142	205	1	63	5e-25	111	62
N.meningitidis_16S	SeqGr32939_1	1	98.44	64	0	1	142	205	1	63	5e-25	111	62
N.meningitidis_16S	SeqGr30634_10	10	98.44	64	0	1	142	205	1	63	5e-25	111	62
N.meningitidis_16S	SeqGr28802_4	4	98.44	64	0	1	142	205	1	63	5e-25	111	62
N.meningitidis_16S	SeqGr28627_1	1	98.44	64	0	1	142	205	1	63	5e-25	111	62
N.meningitidis_16S	SeqGr28031_3	3	98.44	64	0	1	142	205	1	63	5e-25	111	62
N.meningitidis_16S	SeqGr27125_1	1	98.44	64	0	1	142	205	1	63	5e-25	111	62
N.meningitidis_16S	SeqGr26405_1	1	98.44	64	0	1	142	205	1	63	5e-25	111	62
N.meningitidis_16S	SeqGr25844_1	1	98.44	64	0	1	142	205	1	63	5e-25	111	62
N.meningitidis_16S	SeqGr25815_1	1	98.44	64	0	1	142	205	1	63	5e-25	111	62
N.meningitidis_16S	SeqGr25486_1	1	98.44	64	0	1	142	205	1	63	5e-25	111	62
N.meningitidis_16S	SeqGr21952_1	1	98.44	64	0	1	142	205	1	63	5e-25	111	62
N.meningitidis_16S	SeqGr20036_1	1	98.44	64	0	1	142	205	1	63	5e-25	111	62
N.meningitidis_16S	SeqGr19935_1	1	98.44	64	0	1	142	205	1	63	5e-25	111	62
N.meningitidis_16S	SeqGr19019_1	1	98.44	64	0	1	142	205	1	63	5e-25	111	62
N.meningitidis_16S	SeqGr18769_1	1	98.44	64	0	1	142	205	1	63	5e-25	111	62
N.meningitidis_16S	SeqGr17720_1	1	98.44	64	0	1	142	205	1	63	5e-25	111	62
N.meningitidis_16S	SeqGr17655_3	3	98.44	64	0	1	142	205	1	63	5e-25	111	62
N.meningitidis_16S	SeqGr17121_1	1	98.44	64	0	1	142	205	1	63	5e-25	111	62
N.meningitidis_16S	SeqGr16845_1	1	98.44	64	0	1	142	205	1	63	5e-25	111	62
N.meningitidis_16S	SeqGr15435_1	1	98.44	64	0	1	142	205	1	63	5e-25	111	62
N.meningitidis_16S	SeqGr14666_1	1	98.44	64	0	1	142	205	1	63	5e-25	111	62
N.meningitidis_16S	SeqGr14303_1	1	98.44	64	0	1	142	205	1	63	5e-25	111	62
N.meningitidis_16S	SeqGr14158_1	1	98.44	64	0	1	142	205	1	63	5e-25	111	62
N.meningitidis_16S	SeqGr13557_1	1	98.44	64	0	1	142	205	1	63	5e-25	111	62
N.meningitidis_16S	SeqGr13299_1	1	98.44	64	0	1	142	205	1	63	5e-25	111	62
N.meningitidis_16S	SeqGr13136_1	1	98.44	64	0	1	142	205	1	63	5e-25	111	62
N.meningitidis_16S	SeqGr12012_1	1	98.44	64	0	1	142	205	1	63	5e-25	111	62
N.meningitidis_16S	SeqGr11450_2	2	98.44	64	0	1	142	205	1	63	5e-25	111	62
N.meningitidis_16S	SeqGr11341_1	1	98.44	64	0	1	142	205	1	63	5e-25	111	62
N.meningitidis_16S	SeqGr11097_1	1	98.44	64	0	1	142	205	1	63	5e-25	111	62
N.meningitidis_16S	SeqGr9771_1	1	98.44	64	0	1	142	205	1	63	5e-25	111	62
N.meningitidis_16S	SeqGr8693_4	4	98.44	64	0	1	142	205	1	63	5e-25	111	62
N.meningitidis_16S	SeqGr8396_2	2	98.44	64	0	1	142	205	1	63	5e-25	111	62
N.meningitidis_16S	SeqGr8361_9	9	98.44	64	0	1	142	205	1	63	5e-25	111	62
N.meningitidis_16S	SeqGr7532_15	15	98.44	64	0	1	142	205	1	63	5e-25	111	62
N.meningitidis_16S	SeqGr6880_1	1	98.44	64	0	1	142	205	1	63	5e-25	111	62
N.meningitidis_16S	SeqGr4243_5	5	98.44	64	0	1	142	205	1	63	5e-25	111	62
N.meningitidis_16S	SeqGr3513_7	7	98.44	64	0	1	142	205	1	63	5e-25	111	62
N.meningitidis_16S	SeqGr2443_2	2	98.44	64	0	1	142	205	1	63	5e-25	111	62
N.meningitidis_16S	SeqGr2112_1	1	98.44	64	0	1	142	205	1	63	5e-25	111	62
N.meningitidis_16S	SeqGr662_1	1	98.44	64	0	1	142	205	2	64	5e-25	111	62
N.meningitidis_16S	SeqGr74_1	1	98.44	64	0	1	142	205	1	63	5e-25	111	62
N.meningitidis_16S	SeqGr264439_1	1	98.41	63	0	1	143	205	1	62	2e-24	110	61
N.meningitidis_16S	SeqGr264352_1	1	98.41	63	0	1	143	205	1	62	2e-24	110	61
N.meningitidis_16S	SeqGr258706_1	1	98.41	63	0	1	143	205	1	62	2e-24	110	61
N.meningitidis_16S	SeqGr254938_1	1	98.41	63	0	1	142	204	1	62	2e-24	110	61
N.meningitidis_16S	SeqGr243043_1	1	98.41	63	0	1	142	204	1	62	2e-24	110	61
N.meningitidis_16S	SeqGr238306_1	1	98.41	63	0	1	143	205	1	62	2e-24	110	61
N.meningitidis_16S	SeqGr220141_1	1	98.41	63	0	1	143	205	1	62	2e-24	110	61
N.meningitidis_16S	SeqGr215131_1	1	98.41	63	0	1	143	205	1	62	2e-24	110	61
N.meningitidis_16S	SeqGr208714_1	1	98.41	63	0	1	143	205	1	62	2e-24	110	61
N.meningitidis_16S	SeqGr186687_1	1	98.41	63	0	1	142	204	1	62	2e-24	110	61
N.meningitidis_16S	SeqGr184943_2	2	98.41	63	0	1	143	205	1	62	2e-24	110	61
N.meningitidis_16S	SeqGr181257_1	1	98.41	63	0	1	143	205	1	62	2e-24	110	61
N.meningitidis_16S	SeqGr168816_1	1	98.41	63	0	1	142	204	1	62	2e-24	110	61
N.meningitidis_16S	SeqGr165699_1	1	98.41	63	0	1	143	205	1	62	2e-24	110	61
N.meningitidis_16S	SeqGr160324_1	1	98.41	63	0	1	142	204	1	62	2e-24	110	61
N.meningitidis_16S	SeqGr156268_1	1	98.41	63	0	1	142	204	1	62	2e-24	110	61
N.meningitidis_16S	SeqGr156124_1	1	98.41	63	0	1	142	204	1	62	2e-24	110	61
N.meningitidis_16S	SeqGr153737_1	1	98.41	63	0	1	143	205	1	62	2e-24	110	61
N.meningitidis_16S	SeqGr147476_1	1	98.41	63	0	1	142	204	1	62	2e-24	110	61
N.meningitidis_16S	SeqGr141672_1	1	95.59	68	3	0	69	136	1	68	2e-24	110	67
N.meningitidis_16S	SeqGr136394_1	1	98.41	63	0	1	143	205	1	62	2e-24	110	61
N.meningitidis_16S	SeqGr103833_1	1	95.59	68	3	0	1	68	34	101	2e-24	110	67
N.meningitidis_16S	SeqGr89842_1	1	98.41	63	0	1	143	205	1	62	2e-24	110	61
N.meningitidis_16S	SeqGr85299_1	1	98.41	63	0	1	143	205	1	62	2e-24	110	61
N.meningitidis_16S	SeqGr84239_1	1	98.41	63	0	1	143	205	1	62	2e-24	110	61
N.meningitidis_16S	SeqGr63268_1	1	98.41	63	0	1	142	204	1	62	2e-24	110	61
N.meningitidis_16S	SeqGr60394_12	12	98.41	63	0	1	142	204	1	62	2e-24	110	61
N.meningitidis_16S	SeqGr58971_1	1	98.41	63	0	1	143	205	1	62	2e-24	110	61
N.meningitidis_16S	SeqGr58091_1	1	98.41	63	0	1	143	205	1	62	2e-24	110	61
N.meningitidis_16S	SeqGr49589_1	1	98.41	63	0	1	143	205	1	62	2e-24	110	61
N.meningitidis_16S	SeqGr39757_21	21	98.41	63	0	1	142	204	1	62	2e-24	110	61
N.meningitidis_16S	SeqGr30868_1	1	98.41	63	0	1	143	205	1	62	2e-24	110	61
N.meningitidis_16S	SeqGr24296_9	9	98.41	63	0	1	142	204	1	62	2e-24	110	61
N.meningitidis_16S	SeqGr20299_1	1	98.41	63	0	1	142	204	1	62	2e-24	110	61
N.meningitidis_16S	SeqGr17743_1	1	98.41	63	0	1	142	204	1	62	2e-24	110	61
N.meningitidis_16S	SeqGr8518_13	13	98.41	63	0	1	142	204	1	62	2e-24	110	61
N.meningitidis_16S	SeqGr4484_1	1	98.41	63	0	1	143	205	1	62	2e-24	110	61
N.meningitidis_16S	SeqGr2897_1	1	98.41	63	0	1	143	205	1	62	2e-24	110	61
N.meningitidis_16S	SeqGr276970_1	1	98.39	62	0	1	143	204	1	61	6e-24	108	60
N.meningitidis_16S	SeqGr264224_1	1	98.39	62	0	1	142	203	1	61	6e-24	108	60
N.meningitidis_16S	SeqGr237537_1	1	98.39	62	0	1	144	205	1	61	6e-24	108	60
N.meningitidis_16S	SeqGr235821_1	1	95.52	67	3	0	1	67	35	101	6e-24	108	66
N.meningitidis_16S	SeqGr220223_1	1	100	58	0	0	69	126	1	58	6e-24	108	57
N.meningitidis_16S	SeqGr168975_1	1	100	58	0	0	66	123	1	58	6e-24	108	57
N.meningitidis_16S	SeqGr160657_1	1	98.39	62	0	1	144	205	1	61	6e-24	108	60
N.meningitidis_16S	SeqGr144488_3	3	98.39	62	0	1	142	203	1	61	6e-24	108	60
N.meningitidis_16S	SeqGr71242_1	1	98.39	62	0	1	142	203	1	61	6e-24	108	60
N.meningitidis_16S	SeqGr21765_1	1	98.39	62	0	1	142	203	1	61	6e-24	108	60
N.meningitidis_16S	SeqGr13088_1	1	98.39	62	0	1	143	204	1	61	6e-24	108	60
N.meningitidis_16S	SeqGr10219_1	1	98.39	62	0	1	144	205	1	61	6e-24	108	60
N.meningitidis_16S	SeqGr8291_14	14	98.39	62	0	1	142	203	1	61	6e-24	108	60
N.meningitidis_16S	SeqGr277746_1	1	96.88	64	1	1	142	205	1	63	2e-23	106	62
N.meningitidis_16S	SeqGr275510_1	1	96.88	64	1	1	142	205	1	63	2e-23	106	62
N.meningitidis_16S	SeqGr274366_1	1	96.88	64	1	1	142	205	1	63	2e-23	106	62
N.meningitidis_16S	SeqGr273271_1	1	96.88	64	1	1	142	205	1	63	2e-23	106	62
N.meningitidis_16S	SeqGr272771_1	1	96.88	64	1	1	142	205	1	63	2e-23	106	62
N.meningitidis_16S	SeqGr269743_1	1	96.88	64	1	1	142	205	1	63	2e-23	106	62
N.meningitidis_16S	SeqGr268589_1	1	96.88	64	1	1	142	205	1	63	2e-23	106	62
N.meningitidis_16S	SeqGr268251_1	1	96.88	64	1	1	142	205	1	63	2e-23	106	62
N.meningitidis_16S	SeqGr267821_1	1	96.88	64	1	1	142	205	1	63	2e-23	106	62
N.meningitidis_16S	SeqGr266076_1	1	96.88	64	1	1	142	205	1	63	2e-23	106	62
N.meningitidis_16S	SeqGr266044_1	1	96.88	64	1	1	142	205	1	63	2e-23	106	62
N.meningitidis_16S	SeqGr264848_1	1	96.88	64	1	1	142	205	1	63	2e-23	106	62
N.meningitidis_16S	SeqGr263232_1	1	98.36	61	0	1	142	202	1	60	2e-23	106	59
N.meningitidis_16S	SeqGr259700_1	1	96.88	64	1	1	142	205	1	63	2e-23	106	62
N.meningitidis_16S	SeqGr255961_1	1	96.88	64	1	1	142	205	1	63	2e-23	106	62
N.meningitidis_16S	SeqGr255245_1	1	98.36	61	0	1	142	202	1	60	2e-23	106	59
N.meningitidis_16S	SeqGr253285_1	1	96.88	64	1	1	142	205	1	63	2e-23	106	62
N.meningitidis_16S	SeqGr250451_1	1	96.88	64	1	1	142	205	1	63	2e-23	106	62
N.meningitidis_16S	SeqGr243255_1	1	98.36	61	0	1	142	202	1	60	2e-23	106	59
N.meningitidis_16S	SeqGr243176_1	1	96.88	64	1	1	142	205	1	63	2e-23	106	62
N.meningitidis_16S	SeqGr242804_1	1	96.88	64	1	1	142	205	1	63	2e-23	106	62
N.meningitidis_16S	SeqGr241190_1	1	96.88	64	1	1	142	205	1	63	2e-23	106	62
N.meningitidis_16S	SeqGr239768_1	1	96.88	64	1	1	142	205	1	63	2e-23	106	62
N.meningitidis_16S	SeqGr238704_1	1	96.88	64	1	1	142	205	1	63	2e-23	106	62
N.meningitidis_16S	SeqGr237950_1	1	96.88	64	1	1	142	205	1	63	2e-23	106	62
N.meningitidis_16S	SeqGr227019_1	1	96.88	64	1	1	142	205	1	63	2e-23	106	62
N.meningitidis_16S	SeqGr226877_1	1	96.88	64	1	1	142	205	1	63	2e-23	106	62
N.meningitidis_16S	SeqGr223655_1	1	96.88	64	1	1	142	205	1	63	2e-23	106	62
N.meningitidis_16S	SeqGr222030_1	1	96.88	64	1	1	142	205	1	63	2e-23	106	62
N.meningitidis_16S	SeqGr220819_1	1	96.88	64	1	1	142	205	1	63	2e-23	106	62
N.meningitidis_16S	SeqGr220114_1	1	96.88	64	1	1	142	205	1	63	2e-23	106	62
N.meningitidis_16S	SeqGr215994_1	1	98.36	61	0	1	142	202	1	60	2e-23	106	59
N.meningitidis_16S	SeqGr214417_1	1	96.88	64	1	1	142	205	1	63	2e-23	106	62
N.meningitidis_16S	SeqGr214048_1	1	98.36	61	0	1	142	202	1	60	2e-23	106	59
N.meningitidis_16S	SeqGr208781_1	1	96.88	64	1	1	142	205	1	63	2e-23	106	62
N.meningitidis_16S	SeqGr204626_1	1	96.88	64	1	1	142	205	1	63	2e-23	106	62
N.meningitidis_16S	SeqGr203900_1	1	96.88	64	1	1	142	205	1	63	2e-23	106	62
N.meningitidis_16S	SeqGr201862_1	1	96.88	64	1	1	142	205	1	63	2e-23	106	62
N.meningitidis_16S	SeqGr201632_1	1	96.88	64	1	1	142	205	1	63	2e-23	106	62
N.meningitidis_16S	SeqGr201058_1	1	96.88	64	1	1	142	205	1	63	2e-23	106	62
N.meningitidis_16S	SeqGr198185_1	1	96.88	64	1	1	142	205	1	63	2e-23	106	62
N.meningitidis_16S	SeqGr194345_1	1	96.88	64	1	1	142	205	1	63	2e-23	106	62
N.meningitidis_16S	SeqGr193745_1	1	96.88	64	1	1	142	205	1	63	2e-23	106	62
N.meningitidis_16S	SeqGr192048_1	1	96.88	64	1	1	142	205	1	63	2e-23	106	62
N.meningitidis_16S	SeqGr191813_1	1	96.88	64	1	1	142	205	1	63	2e-23	106	62
N.meningitidis_16S	SeqGr189576_1	1	96.88	64	1	1	142	205	1	63	2e-23	106	62
N.meningitidis_16S	SeqGr185960_1	1	96.88	64	1	1	142	205	1	63	2e-23	106	62
N.meningitidis_16S	SeqGr184241_1	1	96.88	64	1	1	142	205	1	63	2e-23	106	62
N.meningitidis_16S	SeqGr180632_1	1	96.88	64	1	1	142	205	1	63	2e-23	106	62
N.meningitidis_16S	SeqGr177767_1	1	98.36	61	0	1	142	202	1	60	2e-23	106	59
N.meningitidis_16S	SeqGr170374_1	1	96.88	64	1	1	142	205	1	63	2e-23	106	62
N.meningitidis_16S	SeqGr166172_1	1	96.88	64	1	1	142	205	1	63	2e-23	106	62
N.meningitidis_16S	SeqGr165636_1	1	96.88	64	1	1	142	205	1	63	2e-23	106	62
N.meningitidis_16S	SeqGr164700_1	1	96.88	64	1	1	142	205	1	63	2e-23	106	62
N.meningitidis_16S	SeqGr161022_1	1	96.88	64	1	1	142	205	1	63	2e-23	106	62
N.meningitidis_16S	SeqGr152168_2	2	98.36	61	0	1	142	202	1	60	2e-23	106	59
N.meningitidis_16S	SeqGr151822_1	1	96.88	64	1	1	142	205	1	63	2e-23	106	62
N.meningitidis_16S	SeqGr150484_1	1	96.88	64	1	1	142	205	1	63	2e-23	106	62
N.meningitidis_16S	SeqGr149532_1	1	96.88	64	1	1	142	205	1	63	2e-23	106	62
N.meningitidis_16S	SeqGr149461_1	1	96.88	64	1	1	142	205	1	63	2e-23	106	62
N.meningitidis_16S	SeqGr148305_1	1	96.88	64	1	1	142	205	1	63	2e-23	106	62
N.meningitidis_16S	SeqGr146823_1	1	96.88	64	1	1	142	205	1	63	2e-23	106	62
N.meningitidis_16S	SeqGr139776_1	1	96.88	64	1	1	142	205	2	64	2e-23	106	62
N.meningitidis_16S	SeqGr135249_1	1	96.88	64	0	2	142	205	1	62	2e-23	106	61
N.meningitidis_16S	SeqGr132598_1	1	96.88	64	1	1	142	205	1	63	2e-23	106	62
N.meningitidis_16S	SeqGr130777_1	1	98.36	61	0	1	145	205	1	60	2e-23	106	59
N.meningitidis_16S	SeqGr128468_1	1	96.88	64	1	1	142	205	1	63	2e-23	106	62
N.meningitidis_16S	SeqGr128003_1	1	96.88	64	1	1	142	205	1	63	2e-23	106	62
N.meningitidis_16S	SeqGr125318_1	1	96.88	64	1	1	142	205	1	63	2e-23	106	62
N.meningitidis_16S	SeqGr125138_1	1	96.88	64	1	1	142	205	1	63	2e-23	106	62
N.meningitidis_16S	SeqGr121490_1	1	96.88	64	1	1	142	205	1	63	2e-23	106	62
N.meningitidis_16S	SeqGr120629_1	1	98.36	61	0	1	142	202	1	60	2e-23	106	59
N.meningitidis_16S	SeqGr119924_1	1	96.88	64	0	1	142	205	1	62	2e-23	106	61
N.meningitidis_16S	SeqGr118903_1	1	96.88	64	1	1	142	205	1	63	2e-23	106	62
N.meningitidis_16S	SeqGr118843_1	1	96.88	64	1	1	142	205	1	63	2e-23	106	62
N.meningitidis_16S	SeqGr114063_1	1	96.88	64	1	1	142	205	1	63	2e-23	106	62
N.meningitidis_16S	SeqGr109730_1	1	96.88	64	1	1	142	205	1	63	2e-23	106	62
N.meningitidis_16S	SeqGr109437_1	1	96.88	64	1	1	142	205	1	63	2e-23	106	62
N.meningitidis_16S	SeqGr103603_1	1	96.88	64	1	1	142	205	1	63	2e-23	106	62
N.meningitidis_16S	SeqGr103039_1	1	96.88	64	1	1	142	205	1	63	2e-23	106	62
N.meningitidis_16S	SeqGr102437_2	2	98.36	61	0	1	142	202	1	60	2e-23	106	59
N.meningitidis_16S	SeqGr99952_1	1	96.88	64	1	1	142	205	1	63	2e-23	106	62
N.meningitidis_16S	SeqGr95645_4	4	98.36	61	0	1	142	202	1	60	2e-23	106	59
N.meningitidis_16S	SeqGr90952_1	1	96.88	64	1	1	142	205	1	63	2e-23	106	62
N.meningitidis_16S	SeqGr87874_1	1	98.36	61	0	1	142	202	1	60	2e-23	106	59
N.meningitidis_16S	SeqGr86530_1	1	96.88	64	1	1	142	205	1	63	2e-23	106	62
N.meningitidis_16S	SeqGr86192_1	1	96.88	64	1	1	142	205	1	63	2e-23	106	62
N.meningitidis_16S	SeqGr85621_1	1	96.88	64	1	1	142	205	1	63	2e-23	106	62
N.meningitidis_16S	SeqGr84926_1	1	98.36	61	0	1	142	202	1	60	2e-23	106	59
N.meningitidis_16S	SeqGr84041_1	1	96.88	64	1	1	142	205	1	63	2e-23	106	62
N.meningitidis_16S	SeqGr81181_1	1	96.88	64	1	1	142	205	1	63	2e-23	106	62
N.meningitidis_16S	SeqGr80518_1	1	96.88	64	1	1	142	205	1	63	2e-23	106	62
N.meningitidis_16S	SeqGr78073_1	1	96.88	64	1	1	142	205	1	63	2e-23	106	62
N.meningitidis_16S	SeqGr78019_1	1	96.88	64	1	1	142	205	1	63	2e-23	106	62
N.meningitidis_16S	SeqGr76796_1	1	96.88	64	1	1	142	205	1	63	2e-23	106	62
N.meningitidis_16S	SeqGr75169_1	1	96.88	64	1	1	142	205	1	63	2e-23	106	62
N.meningitidis_16S	SeqGr65693_1	1	96.88	64	1	1	142	205	1	63	2e-23	106	62
N.meningitidis_16S	SeqGr65213_1	1	96.88	64	1	1	142	205	1	63	2e-23	106	62
N.meningitidis_16S	SeqGr61646_1	1	96.88	64	1	1	142	205	1	63	2e-23	106	62
N.meningitidis_16S	SeqGr61155_1	1	96.88	64	1	1	142	205	1	63	2e-23	106	62
N.meningitidis_16S	SeqGr59752_1	1	96.88	64	1	1	142	205	1	63	2e-23	106	62
N.meningitidis_16S	SeqGr59636_1	1	96.88	64	1	1	142	205	1	63	2e-23	106	62
N.meningitidis_16S	SeqGr55736_1	1	96.88	64	1	1	142	205	1	63	2e-23	106	62
N.meningitidis_16S	SeqGr55169_1	1	96.88	64	1	1	142	205	1	63	2e-23	106	62
N.meningitidis_16S	SeqGr53004_1	1	96.88	64	1	1	142	205	1	63	2e-23	106	62
N.meningitidis_16S	SeqGr51562_1	1	96.88	64	1	1	142	205	1	63	2e-23	106	62
N.meningitidis_16S	SeqGr51322_1	1	96.88	64	1	1	142	205	1	63	2e-23	106	62
N.meningitidis_16S	SeqGr48641_1	1	96.88	64	1	1	142	205	1	63	2e-23	106	62
N.meningitidis_16S	SeqGr46797_1	1	96.88	64	1	1	142	205	1	63	2e-23	106	62
N.meningitidis_16S	SeqGr40953_6	6	98.36	61	0	1	142	202	1	60	2e-23	106	59
N.meningitidis_16S	SeqGr40202_1	1	96.88	64	1	1	142	205	1	63	2e-23	106	62
N.meningitidis_16S	SeqGr39831_1	1	96.88	64	1	1	142	205	1	63	2e-23	106	62
N.meningitidis_16S	SeqGr35565_1	1	96.88	64	1	1	142	205	1	63	2e-23	106	62
N.meningitidis_16S	SeqGr34525_1	1	96.88	64	1	1	142	205	1	63	2e-23	106	62
N.meningitidis_16S	SeqGr32902_1	1	96.88	64	1	1	142	205	1	63	2e-23	106	62
N.meningitidis_16S	SeqGr27645_1	1	96.88	64	1	1	142	205	1	63	2e-23	106	62
N.meningitidis_16S	SeqGr25306_1	1	96.88	64	1	1	142	205	1	63	2e-23	106	62
N.meningitidis_16S	SeqGr18679_1	1	96.88	64	1	1	142	205	1	63	2e-23	106	62
N.meningitidis_16S	SeqGr17502_1	1	96.88	64	1	1	142	205	1	63	2e-23	106	62
N.meningitidis_16S	SeqGr13880_1	1	95.45	66	3	0	1	66	36	101	2e-23	106	65
N.meningitidis_16S	SeqGr12602_1	1	96.88	64	1	1	142	205	1	63	2e-23	106	62
N.meningitidis_16S	SeqGr11571_1	1	96.88	64	1	1	142	205	1	63	2e-23	106	62
N.meningitidis_16S	SeqGr10728_1	1	96.88	64	1	1	142	205	1	63	2e-23	106	62
N.meningitidis_16S	SeqGr7678_1	1	96.88	64	1	1	142	205	1	63	2e-23	106	62
N.meningitidis_16S	SeqGr4917_3	3	98.36	61	0	1	142	202	1	60	2e-23	106	59
N.meningitidis_16S	SeqGr4734_1	1	96.88	64	1	1	142	205	1	63	2e-23	106	62
N.meningitidis_16S	SeqGr2427_1	1	96.88	64	1	1	142	205	1	63	2e-23	106	62
N.meningitidis_16S	SeqGr2277_1	1	98.36	61	0	1	142	202	1	60	2e-23	106	59
N.meningitidis_16S	SeqGr278636_1	1	96.83	63	1	1	143	205	1	62	8e-23	104	61
N.meningitidis_16S	SeqGr274208_1	1	96.83	63	1	1	142	204	1	62	8e-23	104	61
N.meningitidis_16S	SeqGr269744_1	1	96.83	63	1	1	143	205	1	62	8e-23	104	61
N.meningitidis_16S	SeqGr261022_1	1	96.83	63	1	1	142	204	1	62	8e-23	104	61
N.meningitidis_16S	SeqGr223439_1	1	98.33	60	0	1	143	202	1	59	8e-23	104	58
N.meningitidis_16S	SeqGr210859_1	1	98.33	60	0	1	142	201	1	59	8e-23	104	58
N.meningitidis_16S	SeqGr201391_1	1	96.83	63	0	2	142	204	1	61	8e-23	104	60
N.meningitidis_16S	SeqGr190940_1	1	98.33	60	0	1	146	205	1	59	8e-23	104	58
N.meningitidis_16S	SeqGr176322_1	1	96.83	63	1	1	142	204	1	62	8e-23	104	61
N.meningitidis_16S	SeqGr170543_1	1	96.83	63	1	1	143	205	1	62	8e-23	104	61
N.meningitidis_16S	SeqGr160456_1	1	96.83	63	1	1	143	205	1	62	8e-23	104	61
N.meningitidis_16S	SeqGr148713_2	2	100	56	0	0	85	140	1	56	8e-23	104	55
N.meningitidis_16S	SeqGr142326_1	1	96.83	63	1	1	142	204	1	62	8e-23	104	61
N.meningitidis_16S	SeqGr135752_1	1	96.83	63	1	1	142	204	1	62	8e-23	104	61
N.meningitidis_16S	SeqGr131804_1	1	96.83	63	1	1	142	204	1	62	8e-23	104	61
N.meningitidis_16S	SeqGr125783_1	1	96.83	63	1	1	142	204	1	62	8e-23	104	61
N.meningitidis_16S	SeqGr115383_1	1	96.83	63	1	1	143	205	1	62	8e-23	104	61
N.meningitidis_16S	SeqGr112850_1	1	96.83	63	1	1	142	204	1	62	8e-23	104	61
N.meningitidis_16S	SeqGr102071_1	1	96.83	63	1	1	143	205	1	62	8e-23	104	61
N.meningitidis_16S	SeqGr71625_1	1	98.33	60	0	1	143	202	1	59	8e-23	104	58
N.meningitidis_16S	SeqGr63492_1	1	98.33	60	0	1	142	201	1	59	8e-23	104	58
N.meningitidis_16S	SeqGr16747_1	1	96.83	63	1	1	142	204	2	63	8e-23	104	61
N.meningitidis_16S	SeqGr7116_1	1	95.38	65	3	0	1	65	37	101	8e-23	104	64
N.meningitidis_16S	SeqGr275399_1	1	96.77	62	1	1	142	203	1	61	3e-22	102	60
N.meningitidis_16S	SeqGr251888_1	1	96.77	62	1	1	143	204	1	61	3e-22	102	60
N.meningitidis_16S	SeqGr226409_1	1	95.31	64	3	0	1	64	38	101	3e-22	102	63
N.meningitidis_16S	SeqGr78124_4	4	98.31	59	0	1	142	200	1	58	3e-22	102	57
N.meningitidis_16S	SeqGr59035_1	1	98.31	59	0	1	147	205	1	58	3e-22	102	57
N.meningitidis_16S	SeqGr277344_1	1	95.31	64	2	1	142	205	1	63	1e-21	100	62
N.meningitidis_16S	SeqGr276886_1	1	95.31	64	2	1	142	205	1	63	1e-21	100	62
N.meningitidis_16S	SeqGr276568_1	1	96.72	61	1	1	142	202	1	60	1e-21	100	59
N.meningitidis_16S	SeqGr275292_1	1	95.24	63	3	0	1	63	23	85	1e-21	100	62
N.meningitidis_16S	SeqGr275246_1	1	95.31	64	2	1	142	205	1	63	1e-21	100	62
N.meningitidis_16S	SeqGr262581_1	1	95.31	64	2	1	142	205	1	63	1e-21	100	62
N.meningitidis_16S	SeqGr258422_1	1	95.31	64	2	1	142	205	1	63	1e-21	100	62
N.meningitidis_16S	SeqGr239948_1	1	95.31	64	2	1	142	205	1	63	1e-21	100	62
N.meningitidis_16S	SeqGr238547_1	1	95.31	64	2	1	142	205	1	63	1e-21	100	62
N.meningitidis_16S	SeqGr227301_1	1	95.31	64	2	1	142	205	1	63	1e-21	100	62
N.meningitidis_16S	SeqGr217010_1	1	98.28	58	0	1	145	202	1	57	1e-21	100	56
N.meningitidis_16S	SeqGr214098_1	1	95.31	64	2	1	142	205	1	63	1e-21	100	62
N.meningitidis_16S	SeqGr213866_1	1	95.31	64	2	1	142	205	1	63	1e-21	100	62
N.meningitidis_16S	SeqGr212653_1	1	95.31	64	2	1	142	205	1	63	1e-21	100	62
N.meningitidis_16S	SeqGr205027_1	1	95.31	64	2	1	142	205	1	63	1e-21	100	62
N.meningitidis_16S	SeqGr196193_1	1	96.72	61	1	1	142	202	1	60	1e-21	100	59
N.meningitidis_16S	SeqGr196021_1	1	95.31	64	2	1	142	205	1	63	1e-21	100	62
N.meningitidis_16S	SeqGr189312_1	1	95.31	64	2	1	142	205	1	63	1e-21	100	62
N.meningitidis_16S	SeqGr170587_1	1	95.31	64	2	1	142	205	1	63	1e-21	100	62
N.meningitidis_16S	SeqGr161361_1	1	95.24	63	3	0	1	63	23	85	1e-21	100	62
N.meningitidis_16S	SeqGr156225_1	1	95.31	64	2	1	142	205	1	63	1e-21	100	62
N.meningitidis_16S	SeqGr151701_1	1	95.31	64	2	1	142	205	1	63	1e-21	100	62
N.meningitidis_16S	SeqGr143808_1	1	95.31	64	2	1	142	205	1	63	1e-21	100	62
N.meningitidis_16S	SeqGr136992_1	1	95.31	64	2	1	142	205	1	63	1e-21	100	62
N.meningitidis_16S	SeqGr129585_1	1	95.31	64	2	1	142	205	1	63	1e-21	100	62
N.meningitidis_16S	SeqGr113071_1	1	95.31	64	2	1	142	205	1	63	1e-21	100	62
N.meningitidis_16S	SeqGr89985_1	1	95.31	64	2	1	142	205	1	63	1e-21	100	62
N.meningitidis_16S	SeqGr83384_1	1	98.28	58	0	1	142	199	1	57	1e-21	100	56
N.meningitidis_16S	SeqGr78116_1	1	95.31	64	2	1	142	205	1	63	1e-21	100	62
N.meningitidis_16S	SeqGr76395_1	1	95.31	64	2	1	142	205	1	63	1e-21	100	62
N.meningitidis_16S	SeqGr70710_3	3	98.28	58	0	1	142	199	1	57	1e-21	100	56
N.meningitidis_16S	SeqGr70001_1	1	95.31	64	2	1	142	205	1	63	1e-21	100	62
N.meningitidis_16S	SeqGr61883_2	2	98.28	58	0	1	142	199	1	57	1e-21	100	56
N.meningitidis_16S	SeqGr45986_1	1	96.72	61	1	1	142	202	1	60	1e-21	100	59
N.meningitidis_16S	SeqGr44523_1	1	95.31	64	2	1	142	205	1	63	1e-21	100	62
N.meningitidis_16S	SeqGr41639_1	1	95.31	64	2	1	142	205	1	63	1e-21	100	62
N.meningitidis_16S	SeqGr41230_1	1	95.31	64	2	1	142	205	1	63	1e-21	100	62
N.meningitidis_16S	SeqGr31271_1	1	95.24	63	3	0	1	63	39	101	1e-21	100	62
N.meningitidis_16S	SeqGr31129_1	1	95.24	63	3	0	1	63	23	85	1e-21	100	62
N.meningitidis_16S	SeqGr29711_1	1	96.72	61	1	1	142	202	1	60	1e-21	100	59
N.meningitidis_16S	SeqGr23868_1	1	95.31	64	2	1	142	205	1	63	1e-21	100	62
N.meningitidis_16S	SeqGr13601_1	1	98.28	58	0	1	148	205	1	57	1e-21	100	56
N.meningitidis_16S	SeqGr12164_1	1	95.31	64	2	1	142	205	1	63	1e-21	100	62
N.meningitidis_16S	SeqGr11985_1	1	95.31	64	2	1	142	205	1	63	1e-21	100	62
N.meningitidis_16S	SeqGr3722_1	1	95.31	64	2	1	142	205	1	63	1e-21	100	62
N.meningitidis_16S	SeqGr397_1	1	98.28	58	0	1	148	205	1	57	1e-21	100	56
N.meningitidis_16S	SeqGr229895_1	1	98.25	57	0	1	142	198	1	56	4e-21	99	55
N.meningitidis_16S	SeqGr209144_1	1	100	53	0	0	86	138	1	53	4e-21	99	52
N.meningitidis_16S	SeqGr158682_1	1	95.16	62	3	0	1	62	40	101	4e-21	99	61
N.meningitidis_16S	SeqGr153071_1	1	98.25	57	0	1	145	201	4	59	4e-21	99	55
N.meningitidis_16S	SeqGr143529_1	1	95.24	63	2	1	142	204	1	62	4e-21	99	61
N.meningitidis_16S	SeqGr92040_1	1	98.25	57	0	1	148	204	1	56	4e-21	99	55
N.meningitidis_16S	SeqGr70596_1	1	95.24	63	2	1	142	204	1	62	4e-21	99	61
N.meningitidis_16S	SeqGr61122_1	1	95.16	62	3	0	1	62	37	98	4e-21	99	61
N.meningitidis_16S	SeqGr11783_1	1	98.25	57	0	1	149	205	1	56	4e-21	99	55
N.meningitidis_16S	SeqGr8498_3	3	98.25	57	0	1	142	198	1	56	4e-21	99	55
N.meningitidis_16S	SeqGr226515_1	1	95.08	61	3	0	1	61	37	97	1e-20	97.1	60
N.meningitidis_16S	SeqGr134201_1	1	98.21	56	0	1	150	205	1	55	1e-20	97.1	54
N.meningitidis_16S	SeqGr129813_1	1	95.08	61	3	0	1	61	18	78	1e-20	97.1	60
N.meningitidis_16S	SeqGr117670_1	1	98.21	56	0	1	150	205	1	55	1e-20	97.1	54
N.meningitidis_16S	SeqGr79283_1	1	95.08	61	3	0	1	61	41	101	1e-20	97.1	60
N.meningitidis_16S	SeqGr60358_1	1	95.08	61	3	0	1	61	38	98	1e-20	97.1	60
N.meningitidis_16S	SeqGr27956_1	1	95.08	61	3	0	1	61	37	97	1e-20	97.1	60
N.meningitidis_16S	SeqGr10906_1	1	90.41	73	7	0	69	141	1	73	1e-20	97.1	72
N.meningitidis_16S	SeqGr270604_1	1	93.75	64	3	1	142	205	1	63	5e-20	95.3	62
N.meningitidis_16S	SeqGr266049_1	1	93.75	64	3	1	142	205	1	63	5e-20	95.3	62
N.meningitidis_16S	SeqGr250227_1	1	98.18	55	0	1	142	196	1	54	5e-20	95.3	53
N.meningitidis_16S	SeqGr239389_1	1	93.75	64	3	1	142	205	1	63	5e-20	95.3	62
N.meningitidis_16S	SeqGr196068_1	1	93.75	64	2	1	142	205	1	62	5e-20	95.3	61
N.meningitidis_16S	SeqGr193699_1	1	93.75	64	3	1	142	205	1	63	5e-20	95.3	62
N.meningitidis_16S	SeqGr176949_1	1	96.55	58	1	1	142	199	1	57	5e-20	95.3	56
N.meningitidis_16S	SeqGr158105_1	1	95	60	3	0	1	60	23	82	5e-20	95.3	59
N.meningitidis_16S	SeqGr132824_1	1	98.18	55	0	1	134	188	1	54	5e-20	95.3	53
N.meningitidis_16S	SeqGr113982_1	1	96.55	58	1	1	142	199	1	57	5e-20	95.3	56
N.meningitidis_16S	SeqGr76826_1	1	95	60	3	0	1	60	23	82	5e-20	95.3	59
N.meningitidis_16S	SeqGr61206_1	1	98.18	55	0	1	151	205	1	54	5e-20	95.3	53
N.meningitidis_16S	SeqGr60329_1	1	93.75	64	3	1	142	205	1	63	5e-20	95.3	62
N.meningitidis_16S	SeqGr40827_1	1	95	60	3	0	1	60	42	101	5e-20	95.3	59
N.meningitidis_16S	SeqGr22841_1	1	93.75	64	3	1	142	205	1	63	5e-20	95.3	62
N.meningitidis_16S	SeqGr2517_29	29	98.18	55	0	1	142	196	1	54	5e-20	95.3	53
N.meningitidis_16S	SeqGr1934_1	1	98.18	55	0	1	151	205	1	54	5e-20	95.3	53
N.meningitidis_16S	SeqGr269633_1	1	94.92	59	3	0	1	59	37	95	2e-19	93.5	58
N.meningitidis_16S	SeqGr250847_1	1	98.15	54	0	1	142	195	1	53	2e-19	93.5	52
N.meningitidis_16S	SeqGr203965_1	1	94.92	59	3	0	1	59	38	96	2e-19	93.5	58
N.meningitidis_16S	SeqGr202463_3	3	98.15	54	0	1	142	195	1	53	2e-19	93.5	52
N.meningitidis_16S	SeqGr177417_1	1	100	50	0	0	85	134	52	101	2e-19	93.5	49
N.meningitidis_16S	SeqGr154044_1	1	98.15	54	0	1	152	205	1	53	2e-19	93.5	52
N.meningitidis_16S	SeqGr152927_1	1	98.15	54	0	1	152	205	1	53	2e-19	93.5	52
N.meningitidis_16S	SeqGr147663_1	1	100	50	0	0	156	205	2	51	2e-19	93.5	49
N.meningitidis_16S	SeqGr140181_1	1	94.92	59	3	0	1	59	39	97	2e-19	93.5	58
N.meningitidis_16S	SeqGr116501_1	1	98.15	54	0	1	152	205	1	53	2e-19	93.5	52
N.meningitidis_16S	SeqGr94644_1	1	100	50	0	0	156	205	3	52	2e-19	93.5	49
N.meningitidis_16S	SeqGr90751_1	1	96.49	57	1	1	142	198	1	56	2e-19	93.5	55
N.meningitidis_16S	SeqGr85873_1	1	100	50	0	0	156	205	1	50	2e-19	93.5	49
N.meningitidis_16S	SeqGr81647_4	4	98.15	54	0	1	142	195	1	53	2e-19	93.5	52
N.meningitidis_16S	SeqGr81109_1	1	93.65	63	3	1	143	205	1	62	2e-19	93.5	61
N.meningitidis_16S	SeqGr63393_1	1	100	50	0	0	156	205	1	50	2e-19	93.5	49
N.meningitidis_16S	SeqGr54981_1	1	94.92	59	3	0	1	59	43	101	2e-19	93.5	58
N.meningitidis_16S	SeqGr9002_6	6	98.15	54	0	1	142	195	1	53	2e-19	93.5	52
N.meningitidis_16S	SeqGr277870_1	1	94.83	58	3	0	1	58	38	95	7e-19	91.6	57
N.meningitidis_16S	SeqGr276739_1	1	94.83	58	3	0	1	58	4	61	7e-19	91.6	57
N.meningitidis_16S	SeqGr225582_1	1	100	49	0	0	156	204	3	51	7e-19	91.6	48
N.meningitidis_16S	SeqGr209456_1	1	98.11	53	0	1	144	196	1	52	7e-19	91.6	51
N.meningitidis_16S	SeqGr207951_1	1	98.11	53	0	1	142	194	1	52	7e-19	91.6	51
N.meningitidis_16S	SeqGr173314_1	1	100	49	0	0	51	99	1	49	7e-19	91.6	48
N.meningitidis_16S	SeqGr109604_1	1	100	49	0	0	51	99	1	49	7e-19	91.6	48
N.meningitidis_16S	SeqGr82476_1	1	94.83	58	3	0	1	58	44	101	7e-19	91.6	57
N.meningitidis_16S	SeqGr54588_2	2	98.11	53	0	1	142	194	1	52	7e-19	91.6	51
N.meningitidis_16S	SeqGr50173_1	1	94.83	58	3	0	1	58	42	99	7e-19	91.6	57
N.meningitidis_16S	SeqGr46394_1	1	94.83	58	3	0	1	58	16	73	7e-19	91.6	57
N.meningitidis_16S	SeqGr34199_5	5	98.11	53	0	1	142	194	1	52	7e-19	91.6	51
N.meningitidis_16S	SeqGr12524_2	2	98.11	53	0	1	142	194	1	52	7e-19	91.6	51
N.meningitidis_16S	SeqGr273895_1	1	92.19	64	4	1	142	205	1	63	2e-18	89.8	62
N.meningitidis_16S	SeqGr251110_1	1	98.08	52	0	1	142	193	1	51	2e-18	89.8	50
N.meningitidis_16S	SeqGr242630_1	1	92.19	64	4	1	142	205	1	63	2e-18	89.8	62
N.meningitidis_16S	SeqGr236188_1	1	94.74	57	3	0	1	57	36	92	2e-18	89.8	56
N.meningitidis_16S	SeqGr233840_1	1	100	48	0	0	65	112	1	48	2e-18	89.8	47
N.meningitidis_16S	SeqGr216338_1	1	92.19	64	4	1	142	205	1	63	2e-18	89.8	62
N.meningitidis_16S	SeqGr209350_1	1	100	48	0	0	92	139	1	48	2e-18	89.8	47
N.meningitidis_16S	SeqGr177512_1	1	94.74	57	3	0	1	57	37	93	2e-18	89.8	56
N.meningitidis_16S	SeqGr164739_1	1	94.74	57	3	0	1	57	26	82	2e-18	89.8	56
N.meningitidis_16S	SeqGr144154_1	1	94.83	58	2	1	148	205	1	57	2e-18	89.8	56
N.meningitidis_16S	SeqGr143646_1	1	92.19	64	4	1	142	205	1	63	2e-18	89.8	62
N.meningitidis_16S	SeqGr111408_1	1	94.74	57	3	0	1	57	18	74	2e-18	89.8	56
N.meningitidis_16S	SeqGr101935_1	1	96.36	55	1	1	142	196	1	54	2e-18	89.8	53
N.meningitidis_16S	SeqGr100439_7	7	98.08	52	0	1	142	193	1	51	2e-18	89.8	50
N.meningitidis_16S	SeqGr79360_1	1	98.08	52	0	1	142	193	1	51	2e-18	89.8	50
N.meningitidis_16S	SeqGr46351_3	3	98.08	52	0	1	142	193	1	51	2e-18	89.8	50
N.meningitidis_16S	SeqGr37184_1	1	94.74	57	3	0	1	57	45	101	2e-18	89.8	56
N.meningitidis_16S	SeqGr32886_1	1	100	48	0	0	158	205	1	48	2e-18	89.8	47
N.meningitidis_16S	SeqGr19294_1	1	94.74	57	3	0	1	57	36	92	2e-18	89.8	56
N.meningitidis_16S	SeqGr5571_1	1	96.36	55	1	1	142	196	1	54	2e-18	89.8	53
N.meningitidis_16S	SeqGr270286_1	1	94.64	56	3	0	1	56	23	78	8e-18	87.9	55
N.meningitidis_16S	SeqGr183009_1	1	96.3	54	1	1	152	205	1	53	8e-18	87.9	52
N.meningitidis_16S	SeqGr182676_1	1	94.64	56	3	0	1	56	40	95	8e-18	87.9	55
N.meningitidis_16S	SeqGr164452_2	2	98.04	51	0	1	142	192	1	50	8e-18	87.9	49
N.meningitidis_16S	SeqGr153937_1	1	98.04	51	0	1	142	192	1	50	8e-18	87.9	49
N.meningitidis_16S	SeqGr150085_1	1	93.22	59	4	0	1	59	43	101	8e-18	87.9	58
N.meningitidis_16S	SeqGr149348_1	1	98.04	51	0	1	142	192	1	50	8e-18	87.9	49
N.meningitidis_16S	SeqGr145666_1	1	94.64	56	3	0	1	56	37	92	8e-18	87.9	55
N.meningitidis_16S	SeqGr142204_1	1	94.64	56	3	0	1	56	36	91	8e-18	87.9	55
N.meningitidis_16S	SeqGr138300_1	1	93.22	59	4	0	1	59	37	95	8e-18	87.9	58
N.meningitidis_16S	SeqGr128254_1	1	98.04	51	0	1	142	192	1	50	8e-18	87.9	49
N.meningitidis_16S	SeqGr116882_1	1	98.04	51	0	1	142	192	1	50	8e-18	87.9	49
N.meningitidis_16S	SeqGr38514_2	2	98.04	51	0	1	142	192	1	50	8e-18	87.9	49
N.meningitidis_16S	SeqGr14296_1	1	100	47	0	0	159	205	1	47	8e-18	87.9	46
N.meningitidis_16S	SeqGr7545_1	1	96.3	54	1	1	152	205	1	53	8e-18	87.9	52
N.meningitidis_16S	SeqGr4434_26	26	98.04	51	0	1	142	192	1	50	8e-18	87.9	49
N.meningitidis_16S	SeqGr244640_1	1	96.23	53	1	1	142	194	1	52	3e-17	86.1	51
N.meningitidis_16S	SeqGr233605_1	1	94.55	55	3	0	1	55	38	92	3e-17	86.1	54
N.meningitidis_16S	SeqGr228330_1	1	98	50	0	1	142	191	1	49	3e-17	86.1	48
N.meningitidis_16S	SeqGr227749_1	1	98	50	0	1	115	164	1	49	3e-17	86.1	48
N.meningitidis_16S	SeqGr226271_1	1	94.55	55	3	0	1	55	37	91	3e-17	86.1	54
N.meningitidis_16S	SeqGr209326_1	1	94.55	55	3	0	1	55	37	91	3e-17	86.1	54
N.meningitidis_16S	SeqGr162854_1	1	98	50	0	1	143	192	1	49	3e-17	86.1	48
N.meningitidis_16S	SeqGr123876_4	4	98	50	0	1	142	191	1	49	3e-17	86.1	48
N.meningitidis_16S	SeqGr105447_2	2	98	50	0	1	142	191	1	49	3e-17	86.1	48
N.meningitidis_16S	SeqGr85084_1	1	98	50	0	1	142	191	1	49	3e-17	86.1	48
N.meningitidis_16S	SeqGr71857_1	1	98	50	0	1	143	192	1	49	3e-17	86.1	48
N.meningitidis_16S	SeqGr71124_1	1	100	46	0	0	160	205	18	63	3e-17	86.1	45
N.meningitidis_16S	SeqGr256666_1	1	100	45	0	0	161	205	1	45	1e-16	84.2	44
N.meningitidis_16S	SeqGr251008_1	1	90.63	64	5	1	142	205	1	63	1e-16	84.2	62
N.meningitidis_16S	SeqGr246196_1	1	100	45	0	0	161	205	1	45	1e-16	84.2	44
N.meningitidis_16S	SeqGr242684_1	1	100	45	0	0	161	205	1	45	1e-16	84.2	44
N.meningitidis_16S	SeqGr168504_1	1	100	45	0	0	161	205	1	45	1e-16	84.2	44
N.meningitidis_16S	SeqGr168248_1	1	100	45	0	0	161	205	1	45	1e-16	84.2	44
N.meningitidis_16S	SeqGr163236_1	1	100	45	0	0	161	205	1	45	1e-16	84.2	44
N.meningitidis_16S	SeqGr149456_1	1	100	45	0	0	66	110	1	45	1e-16	84.2	44
N.meningitidis_16S	SeqGr142377_1	1	97.96	49	0	1	142	190	1	48	1e-16	84.2	47
N.meningitidis_16S	SeqGr134714_1	1	91.67	60	5	0	1	60	38	97	1e-16	84.2	59
N.meningitidis_16S	SeqGr132783_1	1	100	45	0	0	161	205	1	45	1e-16	84.2	44
N.meningitidis_16S	SeqGr124521_1	1	94.44	54	3	0	1	54	38	91	1e-16	84.2	53
N.meningitidis_16S	SeqGr122325_1	1	100	45	0	0	161	205	1	45	1e-16	84.2	44
N.meningitidis_16S	SeqGr110398_1	1	100	45	0	0	161	205	1	45	1e-16	84.2	44
N.meningitidis_16S	SeqGr109507_1	1	100	45	0	0	161	205	1	45	1e-16	84.2	44
N.meningitidis_16S	SeqGr99881_3	3	97.96	49	0	1	142	190	1	48	1e-16	84.2	47
N.meningitidis_16S	SeqGr83213_1	1	100	45	0	0	161	205	1	45	1e-16	84.2	44
N.meningitidis_16S	SeqGr82138_1	1	100	45	0	0	161	205	1	45	1e-16	84.2	44
N.meningitidis_16S	SeqGr80607_1	1	94.44	54	3	0	1	54	38	91	1e-16	84.2	53
N.meningitidis_16S	SeqGr74952_5	5	97.96	49	0	1	142	190	1	48	1e-16	84.2	47
N.meningitidis_16S	SeqGr67331_1	1	94.44	54	3	0	1	54	48	101	1e-16	84.2	53
N.meningitidis_16S	SeqGr61232_1	1	90.63	64	5	1	142	205	1	63	1e-16	84.2	62
N.meningitidis_16S	SeqGr54448_2	2	100	45	0	0	161	205	1	45	1e-16	84.2	44
N.meningitidis_16S	SeqGr41975_1	1	100	45	0	0	161	205	1	45	1e-16	84.2	44
N.meningitidis_16S	SeqGr17287_1	1	97.96	49	0	1	142	190	1	48	1e-16	84.2	47
N.meningitidis_16S	SeqGr13931_1	1	100	45	0	0	161	205	1	45	1e-16	84.2	44
N.meningitidis_16S	SeqGr10448_1	1	100	45	0	0	161	205	1	45	1e-16	84.2	44
N.meningitidis_16S	SeqGr3036_1	1	100	45	0	0	161	205	1	45	1e-16	84.2	44
N.meningitidis_16S	SeqGr343_2	2	97.96	49	0	1	143	191	1	48	1e-16	84.2	47
N.meningitidis_16S	SeqGr277012_1	1	100	44	0	0	66	109	1	44	4e-16	82.4	43
N.meningitidis_16S	SeqGr273178_1	1	100	44	0	0	156	199	1	44	4e-16	82.4	43
N.meningitidis_16S	SeqGr259760_1	1	92.98	57	2	2	142	198	1	55	4e-16	82.4	54
N.meningitidis_16S	SeqGr245400_1	1	97.92	48	0	1	144	191	1	47	4e-16	82.4	46
N.meningitidis_16S	SeqGr240252_1	1	97.92	48	0	1	142	189	1	47	4e-16	82.4	46
N.meningitidis_16S	SeqGr196434_1	1	100	44	0	0	97	140	1	44	4e-16	82.4	43
N.meningitidis_16S	SeqGr190695_1	1	92.86	56	4	0	1	56	16	71	4e-16	82.4	55
N.meningitidis_16S	SeqGr180960_1	1	97.92	48	0	1	142	189	1	47	4e-16	82.4	46
N.meningitidis_16S	SeqGr148053_2	2	100	44	0	0	161	204	1	44	4e-16	82.4	43
N.meningitidis_16S	SeqGr114475_1	1	100	44	0	0	162	205	1	44	4e-16	82.4	43
N.meningitidis_16S	SeqGr71581_1	1	100	44	0	0	66	109	1	44	4e-16	82.4	43
N.meningitidis_16S	SeqGr40456_1	1	97.92	48	0	1	149	196	1	47	4e-16	82.4	46
N.meningitidis_16S	SeqGr29624_2	2	100	44	0	0	161	204	1	44	4e-16	82.4	43
N.meningitidis_16S	SeqGr20592_5	5	100	44	0	0	161	204	1	44	4e-16	82.4	43
N.meningitidis_16S	SeqGr274010_1	1	100	43	0	0	161	203	1	43	1e-15	80.5	42
N.meningitidis_16S	SeqGr268384_1	1	100	43	0	0	163	205	1	43	1e-15	80.5	42
N.meningitidis_16S	SeqGr264392_1	1	97.87	47	0	1	142	188	1	46	1e-15	80.5	45
N.meningitidis_16S	SeqGr245037_1	1	97.87	47	0	1	142	188	1	46	1e-15	80.5	45
N.meningitidis_16S	SeqGr224435_1	1	100	43	0	0	69	111	1	43	1e-15	80.5	42
N.meningitidis_16S	SeqGr174182_1	1	100	43	0	0	96	138	1	43	1e-15	80.5	42
N.meningitidis_16S	SeqGr126283_1	1	94.23	52	3	0	1	52	41	92	1e-15	80.5	51
N.meningitidis_16S	SeqGr119192_1	1	94.23	52	3	0	1	52	37	88	1e-15	80.5	51
N.meningitidis_16S	SeqGr89879_4	4	100	43	0	0	161	203	1	43	1e-15	80.5	42
N.meningitidis_16S	SeqGr88929_1	1	100	43	0	0	116	158	1	43	1e-15	80.5	42
N.meningitidis_16S	SeqGr61257_3	3	97.87	47	0	1	142	188	1	46	1e-15	80.5	45
N.meningitidis_16S	SeqGr12799_2	2	97.87	47	0	1	142	188	1	46	1e-15	80.5	45
N.meningitidis_16S	SeqGr8478_5	5	97.87	47	0	1	142	188	1	46	1e-15	80.5	45
N.meningitidis_16S	SeqGr3603_4	4	97.87	47	0	1	142	188	1	46	1e-15	80.5	45
N.meningitidis_16S	SeqGr274585_1	1	97.83	46	0	1	142	187	1	45	5e-15	78.7	44
N.meningitidis_16S	SeqGr250207_1	1	94.12	51	3	0	1	51	36	86	5e-15	78.7	50
N.meningitidis_16S	SeqGr249636_1	1	100	42	0	0	113	154	1	42	5e-15	78.7	41
N.meningitidis_16S	SeqGr203076_1	1	100	42	0	0	116	157	1	42	5e-15	78.7	41
N.meningitidis_16S	SeqGr200941_1	1	94.12	51	3	0	1	51	42	92	5e-15	78.7	50
N.meningitidis_16S	SeqGr199439_1	1	97.83	46	0	1	142	187	1	45	5e-15	78.7	44
N.meningitidis_16S	SeqGr168775_1	1	100	42	0	0	161	202	1	42	5e-15	78.7	41
N.meningitidis_16S	SeqGr168630_1	1	100	42	0	0	56	97	1	42	5e-15	78.7	41
N.meningitidis_16S	SeqGr156072_1	1	97.78	45	1	0	161	205	1	45	5e-15	78.7	44
N.meningitidis_16S	SeqGr148236_1	1	100	42	0	0	97	138	1	42	5e-15	78.7	41
N.meningitidis_16S	SeqGr145154_1	1	100	42	0	0	65	106	1	42	5e-15	78.7	41
N.meningitidis_16S	SeqGr140858_1	1	91.38	58	4	1	142	199	1	57	5e-15	78.7	56
N.meningitidis_16S	SeqGr124459_1	1	95.92	49	1	1	142	190	1	48	5e-15	78.7	47
N.meningitidis_16S	SeqGr105042_1	1	100	42	0	0	100	141	1	42	5e-15	78.7	41
N.meningitidis_16S	SeqGr75633_1	1	97.78	45	1	0	161	205	1	45	5e-15	78.7	44
N.meningitidis_16S	SeqGr62256_1	1	97.78	45	1	0	161	205	1	45	5e-15	78.7	44
N.meningitidis_16S	SeqGr60063_1	1	97.83	46	0	1	142	187	1	45	5e-15	78.7	44
N.meningitidis_16S	SeqGr29219_2	2	100	42	0	0	161	202	1	42	5e-15	78.7	41
N.meningitidis_16S	SeqGr276355_1	1	97.73	44	1	0	162	205	1	44	2e-14	76.8	43
N.meningitidis_16S	SeqGr261856_1	1	94	50	3	0	1	50	42	91	2e-14	76.8	49
N.meningitidis_16S	SeqGr244239_1	1	91.07	56	5	0	1	56	23	78	2e-14	76.8	55
N.meningitidis_16S	SeqGr173638_1	1	97.78	45	0	1	144	188	1	44	2e-14	76.8	43
N.meningitidis_16S	SeqGr158946_1	1	100	41	0	0	165	205	1	41	2e-14	76.8	40
N.meningitidis_16S	SeqGr153977_1	1	100	41	0	0	161	201	1	41	2e-14	76.8	40
N.meningitidis_16S	SeqGr153195_1	1	100	41	0	0	71	111	1	41	2e-14	76.8	40
N.meningitidis_16S	SeqGr102401_1	1	94	50	3	0	1	50	52	101	2e-14	76.8	49
N.meningitidis_16S	SeqGr101729_1	1	100	41	0	0	98	138	1	41	2e-14	76.8	40
N.meningitidis_16S	SeqGr80029_1	1	100	41	0	0	100	140	1	41	2e-14	76.8	40
N.meningitidis_16S	SeqGr23977_3	3	97.78	45	0	1	142	186	1	44	2e-14	76.8	43
N.meningitidis_16S	SeqGr258657_1	1	100	40	0	0	101	140	1	40	7e-14	75	39
N.meningitidis_16S	SeqGr174853_1	1	100	40	0	0	66	105	1	40	7e-14	75	39
N.meningitidis_16S	SeqGr173460_1	1	93.88	49	3	0	1	49	23	71	7e-14	75	48
N.meningitidis_16S	SeqGr164655_1	1	100	40	0	0	156	195	2	41	7e-14	75	39
N.meningitidis_16S	SeqGr97206_1	1	100	40	0	0	98	137	1	40	7e-14	75	39
N.meningitidis_16S	SeqGr76865_1	1	100	40	0	0	115	154	1	40	7e-14	75	39
N.meningitidis_16S	SeqGr50466_1	1	100	40	0	0	59	98	1	40	7e-14	75	39
N.meningitidis_16S	SeqGr43146_1	1	100	40	0	0	115	154	1	40	7e-14	75	39
N.meningitidis_16S	SeqGr39937_1	1	97.73	44	0	1	143	186	1	43	7e-14	75	42
N.meningitidis_16S	SeqGr17203_17	17	97.73	44	0	1	142	185	1	43	7e-14	75	42
N.meningitidis_16S	SeqGr15702_1	1	97.67	43	1	0	18	60	1	43	7e-14	75	42
N.meningitidis_16S	SeqGr14830_1	1	100	40	0	0	115	154	1	40	7e-14	75	39
N.meningitidis_16S	SeqGr240996_1	1	100	39	0	0	115	153	1	39	2e-13	73.1	38
N.meningitidis_16S	SeqGr226140_1	1	100	39	0	0	161	199	1	39	2e-13	73.1	38
N.meningitidis_16S	SeqGr225104_1	1	100	39	0	0	115	153	1	39	2e-13	73.1	38
N.meningitidis_16S	SeqGr214029_1	1	95.56	45	2	0	161	205	1	45	2e-13	73.1	44
N.meningitidis_16S	SeqGr169136_2	2	100	39	0	0	161	199	1	39	2e-13	73.1	38
N.meningitidis_16S	SeqGr147610_1	1	100	39	0	0	116	154	1	39	2e-13	73.1	38
N.meningitidis_16S	SeqGr143664_1	1	97.67	43	0	1	143	185	1	42	2e-13	73.1	41
N.meningitidis_16S	SeqGr121837_2	2	100	39	0	0	116	154	1	39	2e-13	73.1	38
N.meningitidis_16S	SeqGr89777_2	2	97.67	43	0	1	142	184	1	42	2e-13	73.1	41
N.meningitidis_16S	SeqGr83821_1	1	97.67	43	0	1	142	184	1	42	2e-13	73.1	41
N.meningitidis_16S	SeqGr67493_2	2	100	39	0	0	115	153	1	39	2e-13	73.1	38
N.meningitidis_16S	SeqGr63432_1	1	93.75	48	3	0	1	48	39	86	2e-13	73.1	47
N.meningitidis_16S	SeqGr47480_1	1	100	39	0	0	167	205	1	39	2e-13	73.1	38
N.meningitidis_16S	SeqGr38378_1	1	97.67	43	0	1	142	184	1	42	2e-13	73.1	41
N.meningitidis_16S	SeqGr6908_9	9	100	39	0	0	116	154	1	39	2e-13	73.1	38
N.meningitidis_16S	SeqGr2990_1	1	93.75	48	3	0	1	48	22	69	2e-13	73.1	47
N.meningitidis_16S	SeqGr273427_1	1	97.62	42	0	1	142	183	1	41	9e-13	71.3	40
N.meningitidis_16S	SeqGr183334_1	1	100	38	0	0	101	138	1	38	9e-13	71.3	37
N.meningitidis_16S	SeqGr174002_2	2	100	38	0	0	117	154	1	38	9e-13	71.3	37
N.meningitidis_16S	SeqGr170590_1	1	93.62	47	3	0	1	47	25	71	9e-13	71.3	46
N.meningitidis_16S	SeqGr154802_1	1	100	38	0	0	86	123	64	101	9e-13	71.3	37
N.meningitidis_16S	SeqGr117894_4	4	100	38	0	0	116	153	1	38	9e-13	71.3	37
N.meningitidis_16S	SeqGr98174_1	1	100	38	0	0	168	205	1	38	9e-13	71.3	37
N.meningitidis_16S	SeqGr79364_1	1	100	38	0	0	115	152	1	38	9e-13	71.3	37
N.meningitidis_16S	SeqGr35973_6	6	93.62	47	3	0	1	47	23	69	9e-13	71.3	46
N.meningitidis_16S	SeqGr28835_6	6	100	38	0	0	116	153	1	38	9e-13	71.3	37
N.meningitidis_16S	SeqGr27726_1	1	100	38	0	0	86	123	64	101	9e-13	71.3	37
N.meningitidis_16S	SeqGr9694_3	3	100	38	0	0	116	153	1	38	9e-13	71.3	37
N.meningitidis_16S	SeqGr278807_1	1	93.48	46	3	0	1	46	23	68	3e-12	69.4	45
N.meningitidis_16S	SeqGr242652_1	1	100	37	0	0	117	153	1	37	3e-12	69.4	36
N.meningitidis_16S	SeqGr233812_1	1	93.48	46	3	0	1	46	23	68	3e-12	69.4	45
N.meningitidis_16S	SeqGr222257_1	1	93.48	46	3	0	1	46	23	68	3e-12	69.4	45
N.meningitidis_16S	SeqGr180622_1	1	100	37	0	0	116	152	1	37	3e-12	69.4	36
N.meningitidis_16S	SeqGr153460_1	1	100	37	0	0	106	142	1	37	3e-12	69.4	36
N.meningitidis_16S	SeqGr116392_1	1	93.48	46	3	0	1	46	23	68	3e-12	69.4	45
N.meningitidis_16S	SeqGr104218_2	2	100	37	0	0	116	152	1	37	3e-12	69.4	36
N.meningitidis_16S	SeqGr89019_1	1	97.56	41	0	1	142	182	1	40	3e-12	69.4	39
N.meningitidis_16S	SeqGr44036_1	1	93.48	46	3	0	1	46	56	101	3e-12	69.4	45
N.meningitidis_16S	SeqGr17309_4	4	100	37	0	0	116	152	1	37	3e-12	69.4	36
N.meningitidis_16S	SeqGr13450_1	1	100	37	0	0	116	152	1	37	3e-12	69.4	36
N.meningitidis_16S	SeqGr227619_1	1	97.5	40	0	1	151	190	1	39	1e-11	67.6	38
N.meningitidis_16S	SeqGr209466_1	1	93.33	45	3	0	1	45	57	101	1e-11	67.6	44
N.meningitidis_16S	SeqGr192734_1	1	93.33	45	3	0	1	45	37	81	1e-11	67.6	44
N.meningitidis_16S	SeqGr184099_2	2	97.44	39	1	0	116	154	1	39	1e-11	67.6	38
N.meningitidis_16S	SeqGr144079_1	1	97.44	39	1	0	17	55	1	39	1e-11	67.6	38
N.meningitidis_16S	SeqGr124058_1	1	100	36	0	0	106	141	1	36	1e-11	67.6	35
N.meningitidis_16S	SeqGr99405_2	2	100	36	0	0	119	154	1	36	1e-11	67.6	35
N.meningitidis_16S	SeqGr88314_1	1	97.5	40	0	1	142	181	1	39	1e-11	67.6	38
N.meningitidis_16S	SeqGr65199_7	7	93.33	45	3	0	1	45	23	67	1e-11	67.6	44
N.meningitidis_16S	SeqGr58889_1	1	93.33	45	3	0	1	45	23	67	1e-11	67.6	44
N.meningitidis_16S	SeqGr23624_2	2	100	36	0	0	161	196	1	36	1e-11	67.6	35
N.meningitidis_16S	SeqGr18024_1	1	100	36	0	0	107	142	1	36	1e-11	67.6	35
N.meningitidis_16S	SeqGr15240_2	2	93.33	45	3	0	1	45	23	67	1e-11	67.6	44
N.meningitidis_16S	SeqGr3694_1	1	100	36	0	0	170	205	1	36	1e-11	67.6	35
N.meningitidis_16S	SeqGr206355_2	2	100	35	0	0	106	140	1	35	4e-11	65.8	34
N.meningitidis_16S	SeqGr201727_1	1	100	35	0	0	62	96	1	35	4e-11	65.8	34
N.meningitidis_16S	SeqGr197768_3	3	93.18	44	3	0	1	44	23	66	4e-11	65.8	43
N.meningitidis_16S	SeqGr192943_1	1	100	35	0	0	118	152	1	35	4e-11	65.8	34
N.meningitidis_16S	SeqGr185804_1	1	100	35	0	0	76	110	1	35	4e-11	65.8	34
N.meningitidis_16S	SeqGr182852_1	1	95.24	42	0	2	142	183	1	40	4e-11	65.8	39
N.meningitidis_16S	SeqGr155259_1	1	93.18	44	3	0	1	44	22	65	4e-11	65.8	43
N.meningitidis_16S	SeqGr154687_1	1	100	35	0	0	171	205	1	35	4e-11	65.8	34
N.meningitidis_16S	SeqGr143036_1	1	93.18	44	3	0	1	44	58	101	4e-11	65.8	43
N.meningitidis_16S	SeqGr124644_1	1	91.49	47	4	0	1	47	23	69	4e-11	65.8	46
N.meningitidis_16S	SeqGr112695_1	1	100	35	0	0	159	193	1	35	4e-11	65.8	34
N.meningitidis_16S	SeqGr88345_1	1	93.18	44	3	0	1	44	23	66	4e-11	65.8	43
N.meningitidis_16S	SeqGr76380_4	4	97.44	39	0	1	142	180	1	38	4e-11	65.8	37
N.meningitidis_16S	SeqGr67183_1	1	93.18	44	3	0	3	46	1	44	4e-11	65.8	43
N.meningitidis_16S	SeqGr64260_1	1	97.44	39	0	1	142	180	1	38	4e-11	65.8	37
N.meningitidis_16S	SeqGr61999_1	1	100	35	0	0	106	140	1	35	4e-11	65.8	34
N.meningitidis_16S	SeqGr55014_1	1	100	35	0	0	114	148	1	35	4e-11	65.8	34
N.meningitidis_16S	SeqGr34380_1	1	97.44	39	0	1	119	157	1	38	4e-11	65.8	37
N.meningitidis_16S	SeqGr11538_1	1	100	35	0	0	171	205	1	35	4e-11	65.8	34
N.meningitidis_16S	SeqGr273956_1	1	93.02	43	3	0	1	43	23	65	1e-10	63.9	42
N.meningitidis_16S	SeqGr270454_1	1	93.02	43	3	0	1	43	23	65	1e-10	63.9	42
N.meningitidis_16S	SeqGr214100_2	2	93.02	43	3	0	1	43	23	65	1e-10	63.9	42
N.meningitidis_16S	SeqGr198078_2	2	93.02	43	3	0	1	43	23	65	1e-10	63.9	42
N.meningitidis_16S	SeqGr185198_1	1	100	34	0	0	115	148	1	34	1e-10	63.9	33
N.meningitidis_16S	SeqGr178630_1	1	100	34	0	0	120	153	1	34	1e-10	63.9	33
N.meningitidis_16S	SeqGr171870_1	1	88.68	53	5	1	142	194	1	52	1e-10	63.9	51
N.meningitidis_16S	SeqGr167286_1	1	93.02	43	3	0	1	43	59	101	1e-10	63.9	42
N.meningitidis_16S	SeqGr150078_1	1	93.02	43	3	0	1	43	30	72	1e-10	63.9	42
N.meningitidis_16S	SeqGr149663_3	3	97.37	38	0	1	148	185	1	37	1e-10	63.9	36
N.meningitidis_16S	SeqGr95900_4	4	93.02	43	3	0	1	43	23	65	1e-10	63.9	42
N.meningitidis_16S	SeqGr48479_1	1	93.02	43	3	0	1	43	22	64	1e-10	63.9	42
N.meningitidis_16S	SeqGr43758_1	1	93.02	43	3	0	1	43	23	65	1e-10	63.9	42
N.meningitidis_16S	SeqGr25510_1	1	100	34	0	0	107	140	1	34	1e-10	63.9	33
N.meningitidis_16S	SeqGr4894_1	1	100	34	0	0	28	61	1	34	1e-10	63.9	33
N.meningitidis_16S	SeqGr278410_1	1	100	33	0	0	26	58	61	93	5e-10	62.1	32
N.meningitidis_16S	SeqGr262299_1	1	100	33	0	0	66	98	1	33	5e-10	62.1	32
N.meningitidis_16S	SeqGr249186_1	1	100	33	0	0	110	142	1	33	5e-10	62.1	32
N.meningitidis_16S	SeqGr248679_3	3	92.86	42	3	0	1	42	23	64	5e-10	62.1	41
N.meningitidis_16S	SeqGr248383_1	1	100	33	0	0	161	193	1	33	5e-10	62.1	32
N.meningitidis_16S	SeqGr209755_1	1	100	33	0	0	109	141	1	33	5e-10	62.1	32
N.meningitidis_16S	SeqGr202862_1	1	97.3	37	0	1	142	178	1	36	5e-10	62.1	35
N.meningitidis_16S	SeqGr200823_1	1	100	33	0	0	163	195	1	33	5e-10	62.1	32
N.meningitidis_16S	SeqGr186379_1	1	97.3	37	0	1	142	178	1	36	5e-10	62.1	35
N.meningitidis_16S	SeqGr127192_1	1	97.3	37	0	1	142	178	1	36	5e-10	62.1	35
N.meningitidis_16S	SeqGr115666_1	1	92.86	42	3	0	1	42	23	64	5e-10	62.1	41
N.meningitidis_16S	SeqGr105147_1	1	92.86	42	3	0	1	42	30	71	5e-10	62.1	41
N.meningitidis_16S	SeqGr84454_1	1	100	33	0	0	116	148	1	33	5e-10	62.1	32
N.meningitidis_16S	SeqGr75835_1	1	97.3	37	0	1	142	178	1	36	5e-10	62.1	35
N.meningitidis_16S	SeqGr54193_1	1	100	33	0	0	173	205	1	33	5e-10	62.1	32
N.meningitidis_16S	SeqGr43556_1	1	92.86	42	3	0	1	42	23	64	5e-10	62.1	41
N.meningitidis_16S	SeqGr28990_1	1	100	33	0	0	173	205	1	33	5e-10	62.1	32
N.meningitidis_16S	SeqGr268623_1	1	92.68	41	3	0	1	41	23	63	2e-09	60.2	40
N.meningitidis_16S	SeqGr260876_1	1	97.22	36	0	1	145	180	1	35	2e-09	60.2	34
N.meningitidis_16S	SeqGr260722_1	1	100	32	0	0	107	138	1	32	2e-09	60.2	31
N.meningitidis_16S	SeqGr223751_1	1	90.91	44	4	0	1	44	22	65	2e-09	60.2	43
N.meningitidis_16S	SeqGr199133_1	1	100	32	0	0	174	205	1	32	2e-09	60.2	31
N.meningitidis_16S	SeqGr189088_1	1	92.68	41	3	0	3	43	1	41	2e-09	60.2	40
N.meningitidis_16S	SeqGr172195_1	1	92.68	41	3	0	1	41	61	101	2e-09	60.2	40
N.meningitidis_16S	SeqGr167293_1	1	100	32	0	0	66	97	1	32	2e-09	60.2	31
N.meningitidis_16S	SeqGr98894_1	1	92.68	41	3	0	1	41	23	63	2e-09	60.2	40
N.meningitidis_16S	SeqGr66156_1	1	92.68	41	3	0	1	41	42	82	2e-09	60.2	40
N.meningitidis_16S	SeqGr6099_1	1	92.68	41	3	0	1	41	22	62	2e-09	60.2	40
N.meningitidis_16S	SeqGr277849_1	1	97.06	34	1	0	161	194	1	34	7e-09	58.4	33
N.meningitidis_16S	SeqGr259518_1	1	100	31	0	0	111	141	1	31	7e-09	58.4	30
N.meningitidis_16S	SeqGr249540_1	1	100	31	0	0	110	140	1	31	7e-09	58.4	30
N.meningitidis_16S	SeqGr196364_2	2	100	31	0	0	111	141	1	31	7e-09	58.4	30
N.meningitidis_16S	SeqGr187986_1	1	100	31	0	0	175	205	1	31	7e-09	58.4	30
N.meningitidis_16S	SeqGr135617_1	1	100	31	0	0	113	143	1	31	7e-09	58.4	30
N.meningitidis_16S	SeqGr120320_1	1	100	31	0	0	112	142	2	32	7e-09	58.4	30
N.meningitidis_16S	SeqGr108269_1	1	92.5	40	3	0	1	40	38	77	7e-09	58.4	39
N.meningitidis_16S	SeqGr70719_1	1	92.5	40	3	0	1	40	23	62	7e-09	58.4	39
N.meningitidis_16S	SeqGr64465_1	1	92.5	40	3	0	1	40	44	83	7e-09	58.4	39
N.meningitidis_16S	SeqGr59579_1	1	100	31	0	0	32	62	1	31	7e-09	58.4	30
N.meningitidis_16S	SeqGr55771_1	1	100	31	0	0	111	141	1	31	7e-09	58.4	30
N.meningitidis_16S	SeqGr47903_1	1	97.14	35	0	1	142	176	1	34	7e-09	58.4	33
N.meningitidis_16S	SeqGr40917_1	1	100	31	0	0	163	193	1	31	7e-09	58.4	30
N.meningitidis_16S	SeqGr38928_1	1	92.5	40	3	0	1	40	23	62	7e-09	58.4	39
N.meningitidis_16S	SeqGr38065_18	18	100	31	0	0	111	141	1	31	7e-09	58.4	30
N.meningitidis_16S	SeqGr34756_1	1	100	31	0	0	160	190	1	31	7e-09	58.4	30
N.meningitidis_16S	SeqGr15938_10	10	100	31	0	0	112	142	1	31	7e-09	58.4	30
N.meningitidis_16S	SeqGr6393_6	6	92.5	40	3	0	1	40	23	62	7e-09	58.4	39
N.meningitidis_16S	SeqGr2485_1	1	100	31	0	0	111	141	1	31	7e-09	58.4	30
N.meningitidis_16S	SeqGr263165_1	1	90.48	42	4	0	1	42	21	62	2e-08	56.5	41
N.meningitidis_16S	SeqGr259510_1	1	96.97	33	1	0	116	148	1	33	2e-08	56.5	32
N.meningitidis_16S	SeqGr253817_1	1	100	30	0	0	112	141	1	30	2e-08	56.5	29
N.meningitidis_16S	SeqGr251700_1	1	97.06	34	0	1	142	175	1	33	2e-08	56.5	32
N.meningitidis_16S	SeqGr237941_2	2	100	30	0	0	112	141	1	30	2e-08	56.5	29
N.meningitidis_16S	SeqGr228619_1	1	100	30	0	0	82	111	31	60	2e-08	56.5	29
N.meningitidis_16S	SeqGr228388_1	1	92.31	39	3	0	1	39	40	78	2e-08	56.5	38
N.meningitidis_16S	SeqGr201276_2	2	92.31	39	3	0	1	39	23	61	2e-08	56.5	38
N.meningitidis_16S	SeqGr171810_1	1	92.31	39	3	0	1	39	47	85	2e-08	56.5	38
N.meningitidis_16S	SeqGr168365_2	2	100	30	0	0	113	142	1	30	2e-08	56.5	29
N.meningitidis_16S	SeqGr166138_2	2	100	30	0	0	112	141	1	30	2e-08	56.5	29
N.meningitidis_16S	SeqGr162082_1	1	100	30	0	0	161	190	1	30	2e-08	56.5	29
N.meningitidis_16S	SeqGr153066_1	1	100	30	0	0	112	141	1	30	2e-08	56.5	29
N.meningitidis_16S	SeqGr145958_1	1	97.06	34	0	1	106	139	7	39	2e-08	56.5	32
N.meningitidis_16S	SeqGr133939_1	1	100	30	0	0	161	190	1	30	2e-08	56.5	29
N.meningitidis_16S	SeqGr133846_1	1	100	30	0	0	111	140	1	30	2e-08	56.5	29
N.meningitidis_16S	SeqGr91162_1	1	96.97	33	1	0	173	205	1	33	2e-08	56.5	32
N.meningitidis_16S	SeqGr86994_2	2	100	30	0	0	111	140	1	30	2e-08	56.5	29
N.meningitidis_16S	SeqGr77658_1	1	100	30	0	0	112	141	1	30	2e-08	56.5	29
N.meningitidis_16S	SeqGr67969_1	1	100	30	0	0	125	154	1	30	2e-08	56.5	29
N.meningitidis_16S	SeqGr62095_5	5	100	30	0	0	111	140	1	30	2e-08	56.5	29
N.meningitidis_16S	SeqGr46244_10	10	100	30	0	0	111	140	1	30	2e-08	56.5	29
N.meningitidis_16S	SeqGr45784_1	1	92.31	39	3	0	1	39	22	60	2e-08	56.5	38
N.meningitidis_16S	SeqGr39481_1	1	92.31	39	3	0	1	39	23	61	2e-08	56.5	38
N.meningitidis_16S	SeqGr31893_2	2	97.06	34	0	1	142	175	1	33	2e-08	56.5	32
N.meningitidis_16S	SeqGr31302_1	1	100	30	0	0	162	191	1	30	2e-08	56.5	29
N.meningitidis_16S	SeqGr28549_10	10	100	30	0	0	112	141	1	30	2e-08	56.5	29
N.meningitidis_16S	SeqGr19291_1	1	88.89	45	5	0	1	45	22	66	2e-08	56.5	44
N.meningitidis_16S	SeqGr4720_9	9	100	30	0	0	111	140	1	30	2e-08	56.5	29
N.meningitidis_16S	SeqGr3837_49	49	100	30	0	0	112	141	1	30	2e-08	56.5	29
N.meningitidis_16S	SeqGr278343_1	1	100	29	0	0	113	141	1	29	9e-08	54.7	28
N.meningitidis_16S	SeqGr274582_1	1	100	29	0	0	113	141	1	29	9e-08	54.7	28
N.meningitidis_16S	SeqGr262198_1	1	90.24	41	4	0	1	41	23	63	9e-08	54.7	40
N.meningitidis_16S	SeqGr254434_1	1	100	29	0	0	106	134	1	29	9e-08	54.7	28
N.meningitidis_16S	SeqGr245917_1	1	100	29	0	0	112	140	2	30	9e-08	54.7	28
N.meningitidis_16S	SeqGr240245_2	2	92.11	38	3	0	1	38	23	60	9e-08	54.7	37
N.meningitidis_16S	SeqGr212221_1	1	96.97	33	0	1	142	174	1	32	9e-08	54.7	31
N.meningitidis_16S	SeqGr208690_1	1	96.97	33	0	1	142	174	1	32	9e-08	54.7	31
N.meningitidis_16S	SeqGr203967_2	2	100	29	0	0	111	139	1	29	9e-08	54.7	28
N.meningitidis_16S	SeqGr196683_1	1	92.11	38	3	0	1	38	46	83	9e-08	54.7	37
N.meningitidis_16S	SeqGr168503_1	1	100	29	0	0	113	141	1	29	9e-08	54.7	28
N.meningitidis_16S	SeqGr147235_2	2	100	29	0	0	113	141	1	29	9e-08	54.7	28
N.meningitidis_16S	SeqGr146989_2	2	100	29	0	0	111	139	1	29	9e-08	54.7	28
N.meningitidis_16S	SeqGr132988_1	1	100	29	0	0	113	141	1	29	9e-08	54.7	28
N.meningitidis_16S	SeqGr122896_1	1	100	29	0	0	119	147	1	29	9e-08	54.7	28
N.meningitidis_16S	SeqGr119370_1	1	90.24	41	4	0	1	41	61	101	9e-08	54.7	40
N.meningitidis_16S	SeqGr119341_1	1	100	29	0	0	112	140	1	29	9e-08	54.7	28
N.meningitidis_16S	SeqGr102149_1	1	100	29	0	0	113	141	1	29	9e-08	54.7	28
N.meningitidis_16S	SeqGr96181_1	1	88.64	44	5	0	1	44	23	66	9e-08	54.7	43
N.meningitidis_16S	SeqGr85553_1	1	100	29	0	0	112	140	1	29	9e-08	54.7	28
N.meningitidis_16S	SeqGr85233_3	3	92.11	38	3	0	1	38	22	59	9e-08	54.7	37
N.meningitidis_16S	SeqGr81250_2	2	96.97	33	0	1	142	174	1	32	9e-08	54.7	31
N.meningitidis_16S	SeqGr78363_1	1	92.11	38	3	0	1	38	48	85	9e-08	54.7	37
N.meningitidis_16S	SeqGr76415_1	1	92.11	38	3	0	1	38	44	81	9e-08	54.7	37
N.meningitidis_16S	SeqGr75919_1	1	92.11	38	3	0	1	38	40	77	9e-08	54.7	37
N.meningitidis_16S	SeqGr71259_2	2	92.11	38	3	0	1	38	16	53	9e-08	54.7	37
N.meningitidis_16S	SeqGr66570_2	2	100	29	0	0	112	140	1	29	9e-08	54.7	28
N.meningitidis_16S	SeqGr60074_1	1	100	29	0	0	113	141	1	29	9e-08	54.7	28
N.meningitidis_16S	SeqGr54139_1	1	100	29	0	0	125	153	1	29	9e-08	54.7	28
N.meningitidis_16S	SeqGr45391_7	7	92.11	38	3	0	1	38	23	60	9e-08	54.7	37
N.meningitidis_16S	SeqGr44725_6	6	100	29	0	0	114	142	1	29	9e-08	54.7	28
N.meningitidis_16S	SeqGr15697_38	38	100	29	0	0	113	141	1	29	9e-08	54.7	28
N.meningitidis_16S	SeqGr9421_52	52	100	29	0	0	112	140	1	29	9e-08	54.7	28
N.meningitidis_16S	SeqGr7829_7	7	100	29	0	0	113	141	1	29	9e-08	54.7	28
N.meningitidis_16S	SeqGr6453_1	1	100	29	0	0	82	110	35	63	9e-08	54.7	28
N.meningitidis_16S	SeqGr3085_15	15	100	29	0	0	112	140	1	29	9e-08	54.7	28
N.meningitidis_16S	SeqGr2351_16	16	100	29	0	0	112	140	1	29	9e-08	54.7	28
N.meningitidis_16S	SeqGr1387_1	1	100	29	0	0	113	141	1	29	9e-08	54.7	28
N.meningitidis_16S	SeqGr275938_1	1	100	28	0	0	114	141	1	28	3e-07	52.8	27
N.meningitidis_16S	SeqGr263450_1	1	100	28	0	0	82	109	37	64	3e-07	52.8	27
N.meningitidis_16S	SeqGr252462_1	1	100	28	0	0	114	141	1	28	3e-07	52.8	27
N.meningitidis_16S	SeqGr245886_1	1	100	28	0	0	114	141	1	28	3e-07	52.8	27
N.meningitidis_16S	SeqGr240894_1	1	100	28	0	0	125	152	1	28	3e-07	52.8	27
N.meningitidis_16S	SeqGr238147_1	1	100	28	0	0	114	141	1	28	3e-07	52.8	27
N.meningitidis_16S	SeqGr232194_1	1	100	28	0	0	113	140	1	28	3e-07	52.8	27
N.meningitidis_16S	SeqGr209229_1	1	100	28	0	0	111	138	1	28	3e-07	52.8	27
N.meningitidis_16S	SeqGr207860_1	1	100	28	0	0	114	141	1	28	3e-07	52.8	27
N.meningitidis_16S	SeqGr198900_1	1	91.89	37	3	0	1	37	42	78	3e-07	52.8	36
N.meningitidis_16S	SeqGr185984_1	1	100	28	0	0	82	109	37	64	3e-07	52.8	27
N.meningitidis_16S	SeqGr183982_1	1	100	28	0	0	107	134	1	28	3e-07	52.8	27
N.meningitidis_16S	SeqGr174323_1	1	100	28	0	0	114	141	11	38	3e-07	52.8	27
N.meningitidis_16S	SeqGr166007_2	2	100	28	0	0	111	138	1	28	3e-07	52.8	27
N.meningitidis_16S	SeqGr164514_2	2	100	28	0	0	115	142	1	28	3e-07	52.8	27
N.meningitidis_16S	SeqGr163100_1	1	96.88	32	0	1	142	173	1	31	3e-07	52.8	30
N.meningitidis_16S	SeqGr162934_1	1	100	28	0	0	114	141	1	28	3e-07	52.8	27
N.meningitidis_16S	SeqGr148295_1	1	100	28	0	0	82	109	35	62	3e-07	52.8	27
N.meningitidis_16S	SeqGr138619_1	1	96.77	31	1	0	161	191	1	31	3e-07	52.8	30
N.meningitidis_16S	SeqGr133419_1	1	91.89	37	3	0	1	37	21	57	3e-07	52.8	36
N.meningitidis_16S	SeqGr111080_5	5	100	28	0	0	113	140	1	28	3e-07	52.8	27
N.meningitidis_16S	SeqGr107551_1	1	91.89	37	3	0	1	37	23	59	3e-07	52.8	36
N.meningitidis_16S	SeqGr107070_1	1	100	28	0	0	82	109	34	61	3e-07	52.8	27
N.meningitidis_16S	SeqGr106281_3	3	100	28	0	0	112	139	1	28	3e-07	52.8	27
N.meningitidis_16S	SeqGr103688_1	1	100	28	0	0	113	140	1	28	3e-07	52.8	27
N.meningitidis_16S	SeqGr95783_2	2	100	28	0	0	111	138	1	28	3e-07	52.8	27
N.meningitidis_16S	SeqGr90294_1	1	100	28	0	0	83	110	36	63	3e-07	52.8	27
N.meningitidis_16S	SeqGr83522_2	2	100	28	0	0	114	141	1	28	3e-07	52.8	27
N.meningitidis_16S	SeqGr79496_1	1	100	28	0	0	109	136	1	28	3e-07	52.8	27
N.meningitidis_16S	SeqGr72820_1	1	100	28	0	0	114	141	1	28	3e-07	52.8	27
N.meningitidis_16S	SeqGr71839_1	1	100	28	0	0	83	110	34	61	3e-07	52.8	27
N.meningitidis_16S	SeqGr69312_1	1	91.89	37	3	0	1	37	22	58	3e-07	52.8	36
N.meningitidis_16S	SeqGr62520_3	3	100	28	0	0	112	139	1	28	3e-07	52.8	27
N.meningitidis_16S	SeqGr59591_1	1	91.89	37	3	0	1	37	23	59	3e-07	52.8	36
N.meningitidis_16S	SeqGr54988_2	2	100	28	0	0	114	141	1	28	3e-07	52.8	27
N.meningitidis_16S	SeqGr53226_1	1	100	28	0	0	178	205	1	28	3e-07	52.8	27
N.meningitidis_16S	SeqGr52361_1	1	100	28	0	0	112	139	1	28	3e-07	52.8	27
N.meningitidis_16S	SeqGr38606_11	11	100	28	0	0	112	139	1	28	3e-07	52.8	27
N.meningitidis_16S	SeqGr29378_6	6	91.89	37	3	0	1	37	23	59	3e-07	52.8	36
N.meningitidis_16S	SeqGr17562_4	4	100	28	0	0	113	140	1	28	3e-07	52.8	27
N.meningitidis_16S	SeqGr17537_1	1	91.89	37	3	0	1	37	23	59	3e-07	52.8	36
N.meningitidis_16S	SeqGr13695_1	1	100	28	0	0	82	109	33	60	3e-07	52.8	27
N.meningitidis_16S	SeqGr12546_73	73	100	28	0	0	114	141	1	28	3e-07	52.8	27
N.meningitidis_16S	SeqGr11993_35	35	100	28	0	0	113	140	1	28	3e-07	52.8	27
N.meningitidis_16S	SeqGr10845_1	1	100	28	0	0	112	139	1	28	3e-07	52.8	27
N.meningitidis_16S	SeqGr9089_5	5	100	28	0	0	114	141	1	28	3e-07	52.8	27
N.meningitidis_16S	SeqGr2374_7	7	100	28	0	0	111	138	1	28	3e-07	52.8	27
N.meningitidis_16S	SeqGr266867_1	1	100	27	0	0	115	141	1	27	1e-06	51	26
N.meningitidis_16S	SeqGr262384_1	1	91.67	36	3	0	1	36	23	58	1e-06	51	35
N.meningitidis_16S	SeqGr261827_1	1	91.67	36	3	0	1	36	66	101	1e-06	51	35
N.meningitidis_16S	SeqGr242964_1	1	100	27	0	0	112	138	1	27	1e-06	51	26
N.meningitidis_16S	SeqGr220900_2	2	100	27	0	0	113	139	1	27	1e-06	51	26
N.meningitidis_16S	SeqGr218985_1	1	100	27	0	0	84	110	57	83	1e-06	51	26
N.meningitidis_16S	SeqGr218168_1	1	96.67	30	1	0	112	141	1	30	1e-06	51	29
N.meningitidis_16S	SeqGr211465_1	1	100	27	0	0	113	139	1	27	1e-06	51	26
N.meningitidis_16S	SeqGr207011_1	1	100	27	0	0	115	141	1	27	1e-06	51	26
N.meningitidis_16S	SeqGr204551_1	1	100	27	0	0	112	138	1	27	1e-06	51	26
N.meningitidis_16S	SeqGr197076_1	1	96.67	30	1	0	112	141	1	30	1e-06	51	29
N.meningitidis_16S	SeqGr194822_1	1	100	27	0	0	115	141	1	27	1e-06	51	26
N.meningitidis_16S	SeqGr188923_1	1	100	27	0	0	86	112	1	27	1e-06	51	26
N.meningitidis_16S	SeqGr188272_1	1	96.77	31	0	1	142	172	1	30	1e-06	51	29
N.meningitidis_16S	SeqGr172031_1	1	100	27	0	0	85	111	73	99	1e-06	51	26
N.meningitidis_16S	SeqGr170224_2	2	100	27	0	0	111	137	1	27	1e-06	51	26
N.meningitidis_16S	SeqGr152948_1	1	96.77	31	0	1	108	138	18	47	1e-06	51	29
N.meningitidis_16S	SeqGr150876_1	1	96.77	31	0	1	142	172	1	30	1e-06	51	29
N.meningitidis_16S	SeqGr135730_1	1	96.77	31	0	1	142	172	1	30	1e-06	51	29
N.meningitidis_16S	SeqGr133480_1	1	91.67	36	3	0	1	36	10	45	1e-06	51	35
N.meningitidis_16S	SeqGr131800_1	1	100	27	0	0	114	140	2	28	1e-06	51	26
N.meningitidis_16S	SeqGr124122_1	1	100	27	0	0	112	138	1	27	1e-06	51	26
N.meningitidis_16S	SeqGr121812_1	1	100	27	0	0	84	110	33	59	1e-06	51	26
N.meningitidis_16S	SeqGr119307_1	1	100	27	0	0	84	110	58	84	1e-06	51	26
N.meningitidis_16S	SeqGr117781_3	3	100	27	0	0	112	138	1	27	1e-06	51	26
N.meningitidis_16S	SeqGr116851_1	1	100	27	0	0	126	152	1	27	1e-06	51	26
N.meningitidis_16S	SeqGr110300_1	1	100	27	0	0	114	140	1	27	1e-06	51	26
N.meningitidis_16S	SeqGr110042_1	1	100	27	0	0	84	110	42	68	1e-06	51	26
N.meningitidis_16S	SeqGr102524_1	1	100	27	0	0	83	109	34	60	1e-06	51	26
N.meningitidis_16S	SeqGr99303_1	1	100	27	0	0	112	138	24	50	1e-06	51	26
N.meningitidis_16S	SeqGr98825_1	1	91.67	36	3	0	1	36	23	58	1e-06	51	35
N.meningitidis_16S	SeqGr85569_1	1	100	27	0	0	84	110	69	95	1e-06	51	26
N.meningitidis_16S	SeqGr83612_5	5	100	27	0	0	113	139	1	27	1e-06	51	26
N.meningitidis_16S	SeqGr64095_1	1	96.77	31	0	1	142	172	1	30	1e-06	51	29
N.meningitidis_16S	SeqGr60067_8	8	100	27	0	0	112	138	1	27	1e-06	51	26
N.meningitidis_16S	SeqGr49566_1	1	100	27	0	0	113	139	1	27	1e-06	51	26
N.meningitidis_16S	SeqGr31249_13	13	100	27	0	0	112	138	1	27	1e-06	51	26
N.meningitidis_16S	SeqGr30210_11	11	100	27	0	0	114	140	1	27	1e-06	51	26
N.meningitidis_16S	SeqGr23616_12	12	100	27	0	0	115	141	1	27	1e-06	51	26
N.meningitidis_16S	SeqGr19810_1	1	100	27	0	0	86	112	71	97	1e-06	51	26
N.meningitidis_16S	SeqGr16849_1	1	100	27	0	0	114	140	1	27	1e-06	51	26
N.meningitidis_16S	SeqGr16018_1	1	100	27	0	0	86	112	64	90	1e-06	51	26
N.meningitidis_16S	SeqGr15261_16	16	100	27	0	0	114	140	1	27	1e-06	51	26
N.meningitidis_16S	SeqGr6525_54	54	100	27	0	0	114	140	1	27	1e-06	51	26
N.meningitidis_16S	SeqGr5857_15	15	100	27	0	0	116	142	1	27	1e-06	51	26
N.meningitidis_16S	SeqGr1376_6	6	100	27	0	0	115	141	1	27	1e-06	51	26
N.meningitidis_16S	SeqGr280535_1	1	100	26	0	0	84	109	71	96	4e-06	49.1	25
N.meningitidis_16S	SeqGr278276_1	1	100	26	0	0	86	111	68	93	4e-06	49.1	25
N.meningitidis_16S	SeqGr275948_1	1	100	26	0	0	112	137	1	26	4e-06	49.1	25
N.meningitidis_16S	SeqGr263212_1	1	100	26	0	0	85	110	50	75	4e-06	49.1	25
N.meningitidis_16S	SeqGr261146_1	1	100	26	0	0	84	109	52	77	4e-06	49.1	25
N.meningitidis_16S	SeqGr260491_1	1	100	26	0	0	85	110	2	27	4e-06	49.1	25
N.meningitidis_16S	SeqGr259971_1	1	100	26	0	0	85	110	63	88	4e-06	49.1	25
N.meningitidis_16S	SeqGr258425_1	1	100	26	0	0	113	138	1	26	4e-06	49.1	25
N.meningitidis_16S	SeqGr257389_1	1	100	26	0	0	86	111	31	56	4e-06	49.1	25
N.meningitidis_16S	SeqGr253573_1	1	100	26	0	0	86	111	62	87	4e-06	49.1	25
N.meningitidis_16S	SeqGr246684_1	1	100	26	0	0	86	111	64	89	4e-06	49.1	25
N.meningitidis_16S	SeqGr242136_1	1	100	26	0	0	86	111	68	93	4e-06	49.1	25
N.meningitidis_16S	SeqGr241577_1	1	100	26	0	0	86	111	54	79	4e-06	49.1	25
N.meningitidis_16S	SeqGr236260_1	1	100	26	0	0	86	111	19	44	4e-06	49.1	25
N.meningitidis_16S	SeqGr226699_1	1	100	26	0	0	86	111	63	88	4e-06	49.1	25
N.meningitidis_16S	SeqGr225175_1	1	100	26	0	0	86	111	63	88	4e-06	49.1	25
N.meningitidis_16S	SeqGr216038_1	1	100	26	0	0	86	111	63	88	4e-06	49.1	25
N.meningitidis_16S	SeqGr215637_2	2	100	26	0	0	86	111	25	50	4e-06	49.1	25
N.meningitidis_16S	SeqGr213694_1	1	100	26	0	0	114	139	1	26	4e-06	49.1	25
N.meningitidis_16S	SeqGr208972_1	1	100	26	0	0	86	111	21	46	4e-06	49.1	25
N.meningitidis_16S	SeqGr207299_1	1	100	26	0	0	86	111	68	93	4e-06	49.1	25
N.meningitidis_16S	SeqGr205161_1	1	100	26	0	0	86	111	47	72	4e-06	49.1	25
N.meningitidis_16S	SeqGr202678_1	1	100	26	0	0	113	138	1	26	4e-06	49.1	25
N.meningitidis_16S	SeqGr194517_1	1	100	26	0	0	86	111	59	84	4e-06	49.1	25
N.meningitidis_16S	SeqGr193497_1	1	100	26	0	0	86	111	68	93	4e-06	49.1	25
N.meningitidis_16S	SeqGr190676_3	3	100	26	0	0	114	139	1	26	4e-06	49.1	25
N.meningitidis_16S	SeqGr184638_1	1	100	26	0	0	86	111	75	100	4e-06	49.1	25
N.meningitidis_16S	SeqGr183264_1	1	100	26	0	0	116	141	1	26	4e-06	49.1	25
N.meningitidis_16S	SeqGr178821_1	1	100	26	0	0	114	139	1	26	4e-06	49.1	25
N.meningitidis_16S	SeqGr175528_2	2	100	26	0	0	111	136	1	26	4e-06	49.1	25
N.meningitidis_16S	SeqGr172589_1	1	100	26	0	0	86	111	64	89	4e-06	49.1	25
N.meningitidis_16S	SeqGr164098_1	1	100	26	0	0	86	111	53	78	4e-06	49.1	25
N.meningitidis_16S	SeqGr163032_1	1	100	26	0	0	85	110	34	59	4e-06	49.1	25
N.meningitidis_16S	SeqGr155818_1	1	100	26	0	0	86	111	64	89	4e-06	49.1	25
N.meningitidis_16S	SeqGr153078_1	1	100	26	0	0	116	141	1	26	4e-06	49.1	25
N.meningitidis_16S	SeqGr144409_1	1	100	26	0	0	86	111	68	93	4e-06	49.1	25
N.meningitidis_16S	SeqGr143042_1	1	100	26	0	0	86	111	64	89	4e-06	49.1	25
N.meningitidis_16S	SeqGr141717_3	3	100	26	0	0	85	110	1	26	4e-06	49.1	25
N.meningitidis_16S	SeqGr141444_1	1	100	26	0	0	86	111	67	92	4e-06	49.1	25
N.meningitidis_16S	SeqGr140336_1	1	100	26	0	0	85	110	73	98	4e-06	49.1	25
N.meningitidis_16S	SeqGr140190_1	1	100	26	0	0	86	111	75	100	4e-06	49.1	25
N.meningitidis_16S	SeqGr138344_1	1	100	26	0	0	85	110	40	65	4e-06	49.1	25
N.meningitidis_16S	SeqGr132380_1	1	96.55	29	1	0	112	140	1	29	4e-06	49.1	28
N.meningitidis_16S	SeqGr131352_1	1	100	26	0	0	114	139	1	26	4e-06	49.1	25
N.meningitidis_16S	SeqGr129916_1	1	100	26	0	0	116	141	1	26	4e-06	49.1	25
N.meningitidis_16S	SeqGr127050_1	1	100	26	0	0	86	111	64	89	4e-06	49.1	25
N.meningitidis_16S	SeqGr124953_1	1	100	26	0	0	85	110	29	54	4e-06	49.1	25
N.meningitidis_16S	SeqGr123785_1	1	100	26	0	0	86	111	64	89	4e-06	49.1	25
N.meningitidis_16S	SeqGr110533_1	1	100	26	0	0	86	111	64	89	4e-06	49.1	25
N.meningitidis_16S	SeqGr109984_1	1	100	26	0	0	117	142	1	26	4e-06	49.1	25
N.meningitidis_16S	SeqGr107020_1	1	100	26	0	0	86	111	65	90	4e-06	49.1	25
N.meningitidis_16S	SeqGr101965_1	1	100	26	0	0	86	111	12	37	4e-06	49.1	25
N.meningitidis_16S	SeqGr96434_1	1	100	26	0	0	85	110	9	34	4e-06	49.1	25
N.meningitidis_16S	SeqGr94529_2	2	100	26	0	0	113	138	1	26	4e-06	49.1	25
N.meningitidis_16S	SeqGr88993_3	3	100	26	0	0	116	141	1	26	4e-06	49.1	25
N.meningitidis_16S	SeqGr88723_4	4	100	26	0	0	114	139	1	26	4e-06	49.1	25
N.meningitidis_16S	SeqGr84708_3	3	100	26	0	0	115	140	1	26	4e-06	49.1	25
N.meningitidis_16S	SeqGr82586_1	1	100	26	0	0	85	110	17	42	4e-06	49.1	25
N.meningitidis_16S	SeqGr79979_1	1	100	26	0	0	113	138	1	26	4e-06	49.1	25
N.meningitidis_16S	SeqGr74865_1	1	100	26	0	0	84	109	10	35	4e-06	49.1	25
N.meningitidis_16S	SeqGr71580_1	1	100	26	0	0	86	111	64	89	4e-06	49.1	25
N.meningitidis_16S	SeqGr66679_1	1	100	26	0	0	86	111	64	89	4e-06	49.1	25
N.meningitidis_16S	SeqGr64624_1	1	100	26	0	0	86	111	64	89	4e-06	49.1	25
N.meningitidis_16S	SeqGr57579_1	1	100	26	0	0	86	111	64	89	4e-06	49.1	25
N.meningitidis_16S	SeqGr57260_3	3	100	26	0	0	116	141	1	26	4e-06	49.1	25
N.meningitidis_16S	SeqGr56443_1	1	100	26	0	0	113	138	1	26	4e-06	49.1	25
N.meningitidis_16S	SeqGr53976_1	1	100	26	0	0	86	111	64	89	4e-06	49.1	25
N.meningitidis_16S	SeqGr50161_1	1	100	26	0	0	86	111	55	80	4e-06	49.1	25
N.meningitidis_16S	SeqGr46734_1	1	100	26	0	0	86	111	64	89	4e-06	49.1	25
N.meningitidis_16S	SeqGr46523_1	1	100	26	0	0	86	111	64	89	4e-06	49.1	25
N.meningitidis_16S	SeqGr46352_1	1	100	26	0	0	86	111	1	26	4e-06	49.1	25
N.meningitidis_16S	SeqGr45738_1	1	100	26	0	0	86	111	63	88	4e-06	49.1	25
N.meningitidis_16S	SeqGr43968_1	1	93.75	32	2	0	11	42	2	33	4e-06	49.1	31
N.meningitidis_16S	SeqGr43523_1	1	100	26	0	0	86	111	64	89	4e-06	49.1	25
N.meningitidis_16S	SeqGr43403_8	8	100	26	0	0	115	140	1	26	4e-06	49.1	25
N.meningitidis_16S	SeqGr43387_1	1	100	26	0	0	86	111	64	89	4e-06	49.1	25
N.meningitidis_16S	SeqGr41519_4	4	100	26	0	0	115	140	1	26	4e-06	49.1	25
N.meningitidis_16S	SeqGr41130_1	1	100	26	0	0	86	111	64	89	4e-06	49.1	25
N.meningitidis_16S	SeqGr39383_1	1	89.47	38	4	0	1	38	60	97	4e-06	49.1	37
N.meningitidis_16S	SeqGr36970_1	1	100	26	0	0	86	111	64	89	4e-06	49.1	25
N.meningitidis_16S	SeqGr35468_1	1	100	26	0	0	86	111	64	89	4e-06	49.1	25
N.meningitidis_16S	SeqGr20426_6	6	100	26	0	0	114	139	1	26	4e-06	49.1	25
N.meningitidis_16S	SeqGr19648_1	1	100	26	0	0	112	137	1	26	4e-06	49.1	25
N.meningitidis_16S	SeqGr7675_1	1	100	26	0	0	86	111	64	89	4e-06	49.1	25
N.meningitidis_16S	SeqGr7102_22	22	100	26	0	0	116	141	1	26	4e-06	49.1	25
N.meningitidis_16S	SeqGr4239_4	4	100	26	0	0	112	137	1	26	4e-06	49.1	25
N.meningitidis_16S	SeqGr4088_16	16	100	26	0	0	113	138	1	26	4e-06	49.1	25
N.meningitidis_16S	SeqGr2778_1	1	100	26	0	0	86	111	64	89	4e-06	49.1	25
N.meningitidis_16S	SeqGr2394_1	1	100	26	0	0	86	111	64	89	4e-06	49.1	25
N.meningitidis_16S	SeqGr1128_142	142	100	26	0	0	116	141	1	26	4e-06	49.1	25

[truncated: 27 more sheets: Nmeningitidis_ALL, Banthracis739, Mpneumoniae953, Lmonocytogenes238, Lmonocytogenes239, Lmoncytogenes240, Lmonocytogenes241, Lmonocytogenes_ALL, Llactis913, Linterrogans245, Linterrogans246, Linterrogans247, Linterrogans248, Linterrogans249, Linterrogans250, Linterrogans251, Linterrogans252, Linterrogans_ALL, Dvulgaris256, Ddeserti284 …]
